# Supplementary material for: NGS-based reverse genetic screen for common embryonic lethal mutations compromising fertility in livestock
Source: PubMed Central journal article supplement — Genome Res. 2016 Oct;26(10):1333–41. doi: 10.1101/gr.207076.116 (PMC5052051; doi:10.1101/gr.207076.116), 2016-10
Supplement: supp_gr.207076.116_Supplemental_Fig_S1.pdf [file supp_gr.207076.116_Supplemental_Fig_S1.pdf]

**A.**

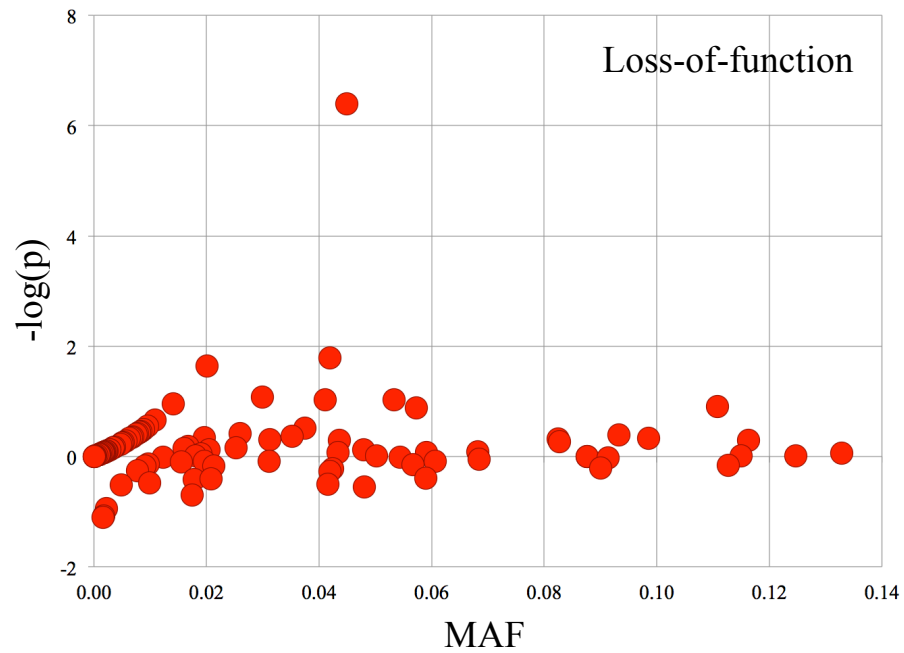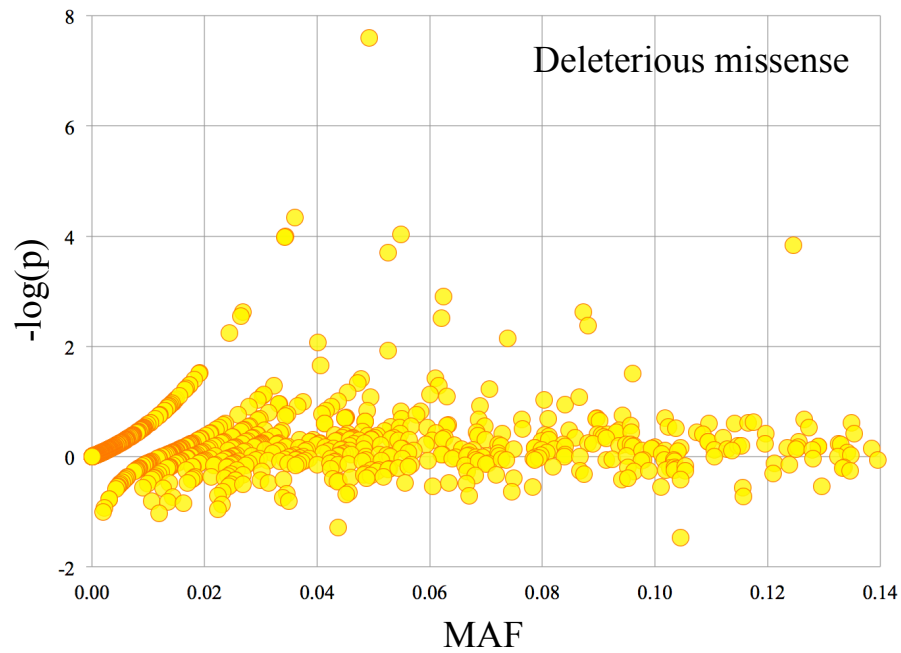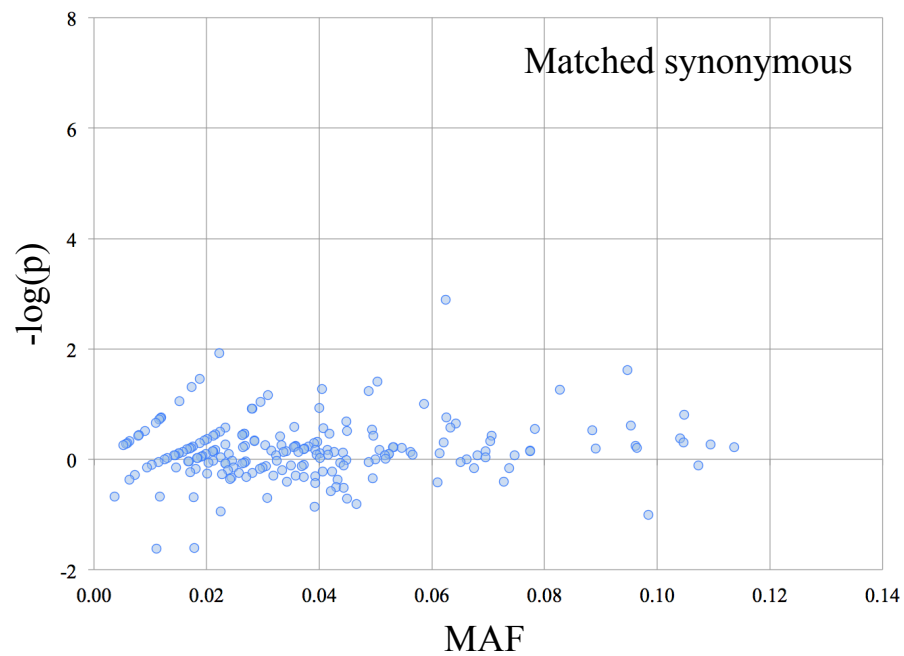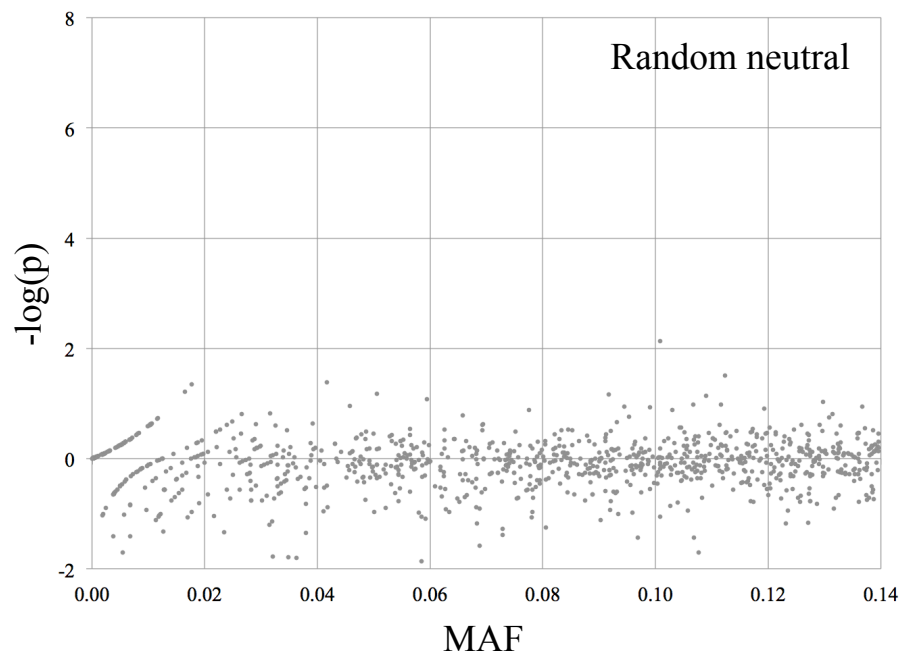

**B.**

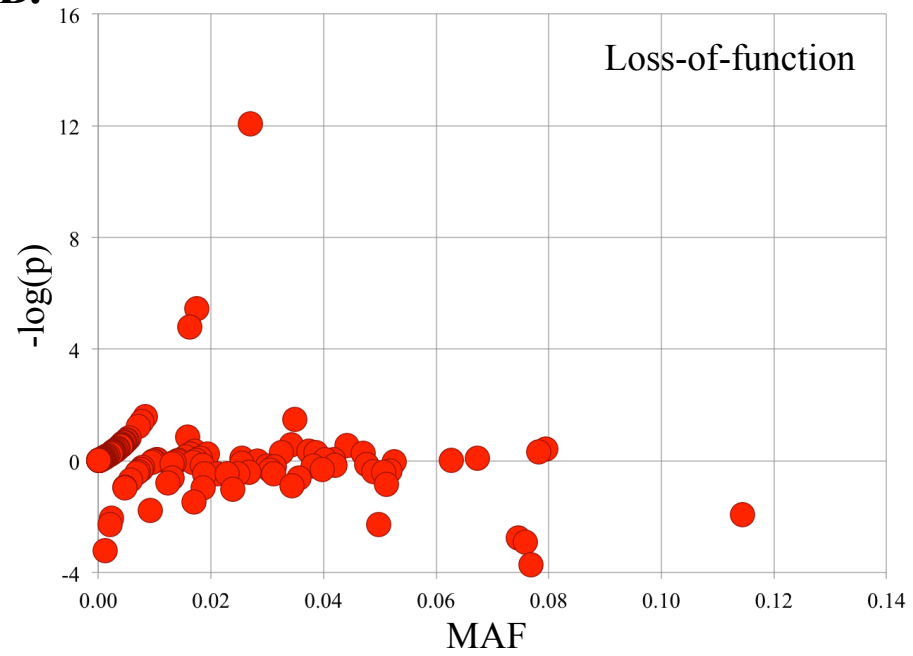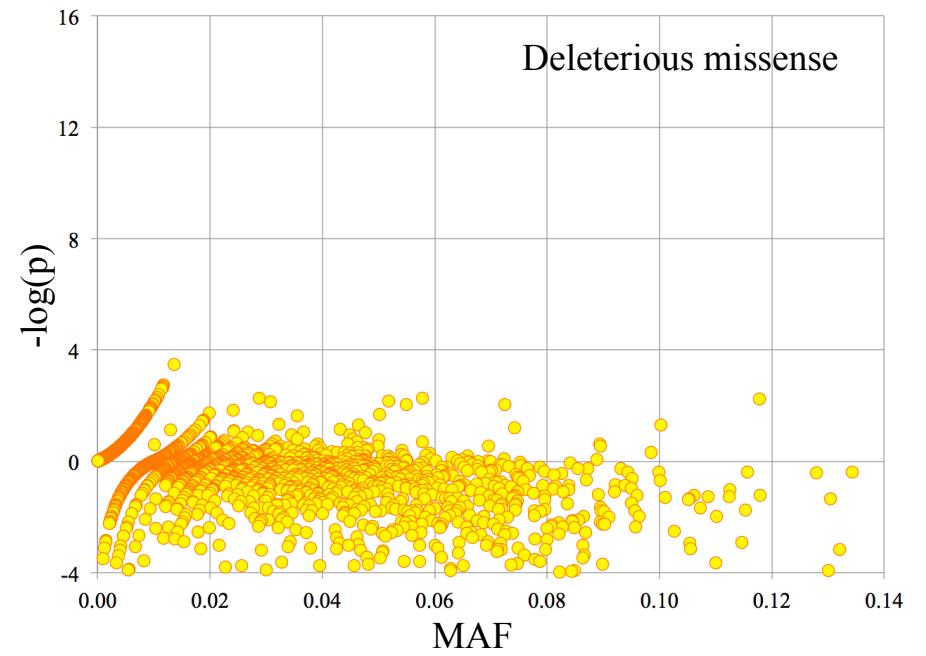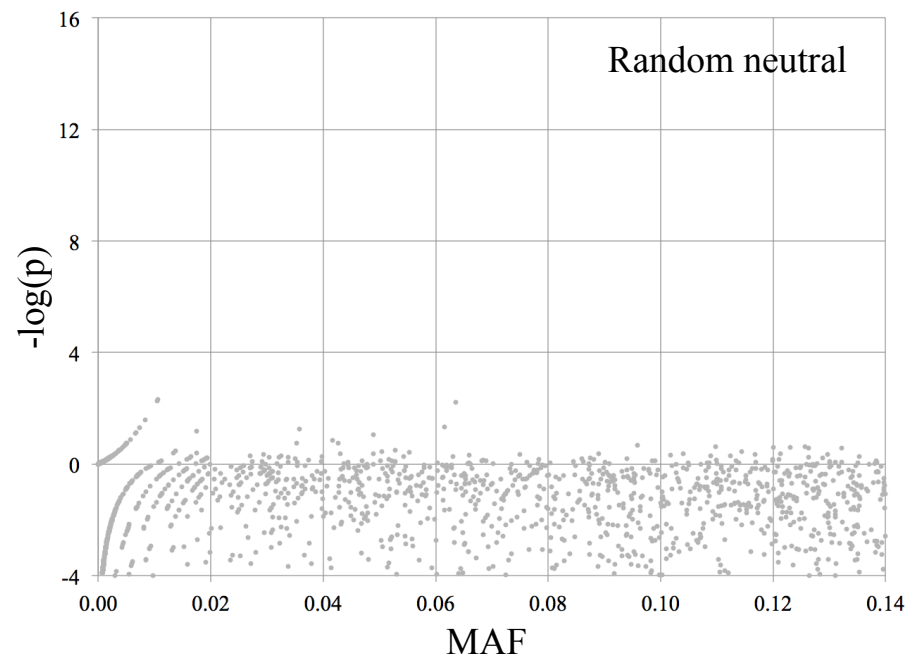

**Supplemental Figure S1** : Statistical significance ( $-\log p$ : Y-axis) of the depletion (positive values) or excess (negative values) in homozygotes shown separately for loss-of-function (red; defined as frame-shift, splice-site and stop-gain variants), missense (yellow), matched synonymous (blue), random neutral (small grey) variants ordered by minor allele frequency (MAF: X-axis), based on the genotyping of 6,385 healthy BBC (**A**) and 35,219 healthy NZDC (**B**) animals. For NZDC (**B**), MAF were computed across breeds (NZ Holstein-Friesian, NZ Jersey and NZ cross-bred), explaining the differences with the within breed MAF reported in Table 2, and the high proportion of variants with negative  $-\log(p)$  values.
