# Supplementary material for: NGS-based reverse genetic screen for common embryonic lethal mutations compromising fertility in livestock
Source: PubMed Central journal article supplement — Genome Res. 2016 Oct;26(10):1333–41. doi: 10.1101/gr.207076.116 (PMC5052051; doi:10.1101/gr.207076.116), 2016-10
Supplement: supp_gr.207076.116_Supplemental_Fig_S2.pdf [file supp_gr.207076.116_Supplemental_Fig_S2.pdf]

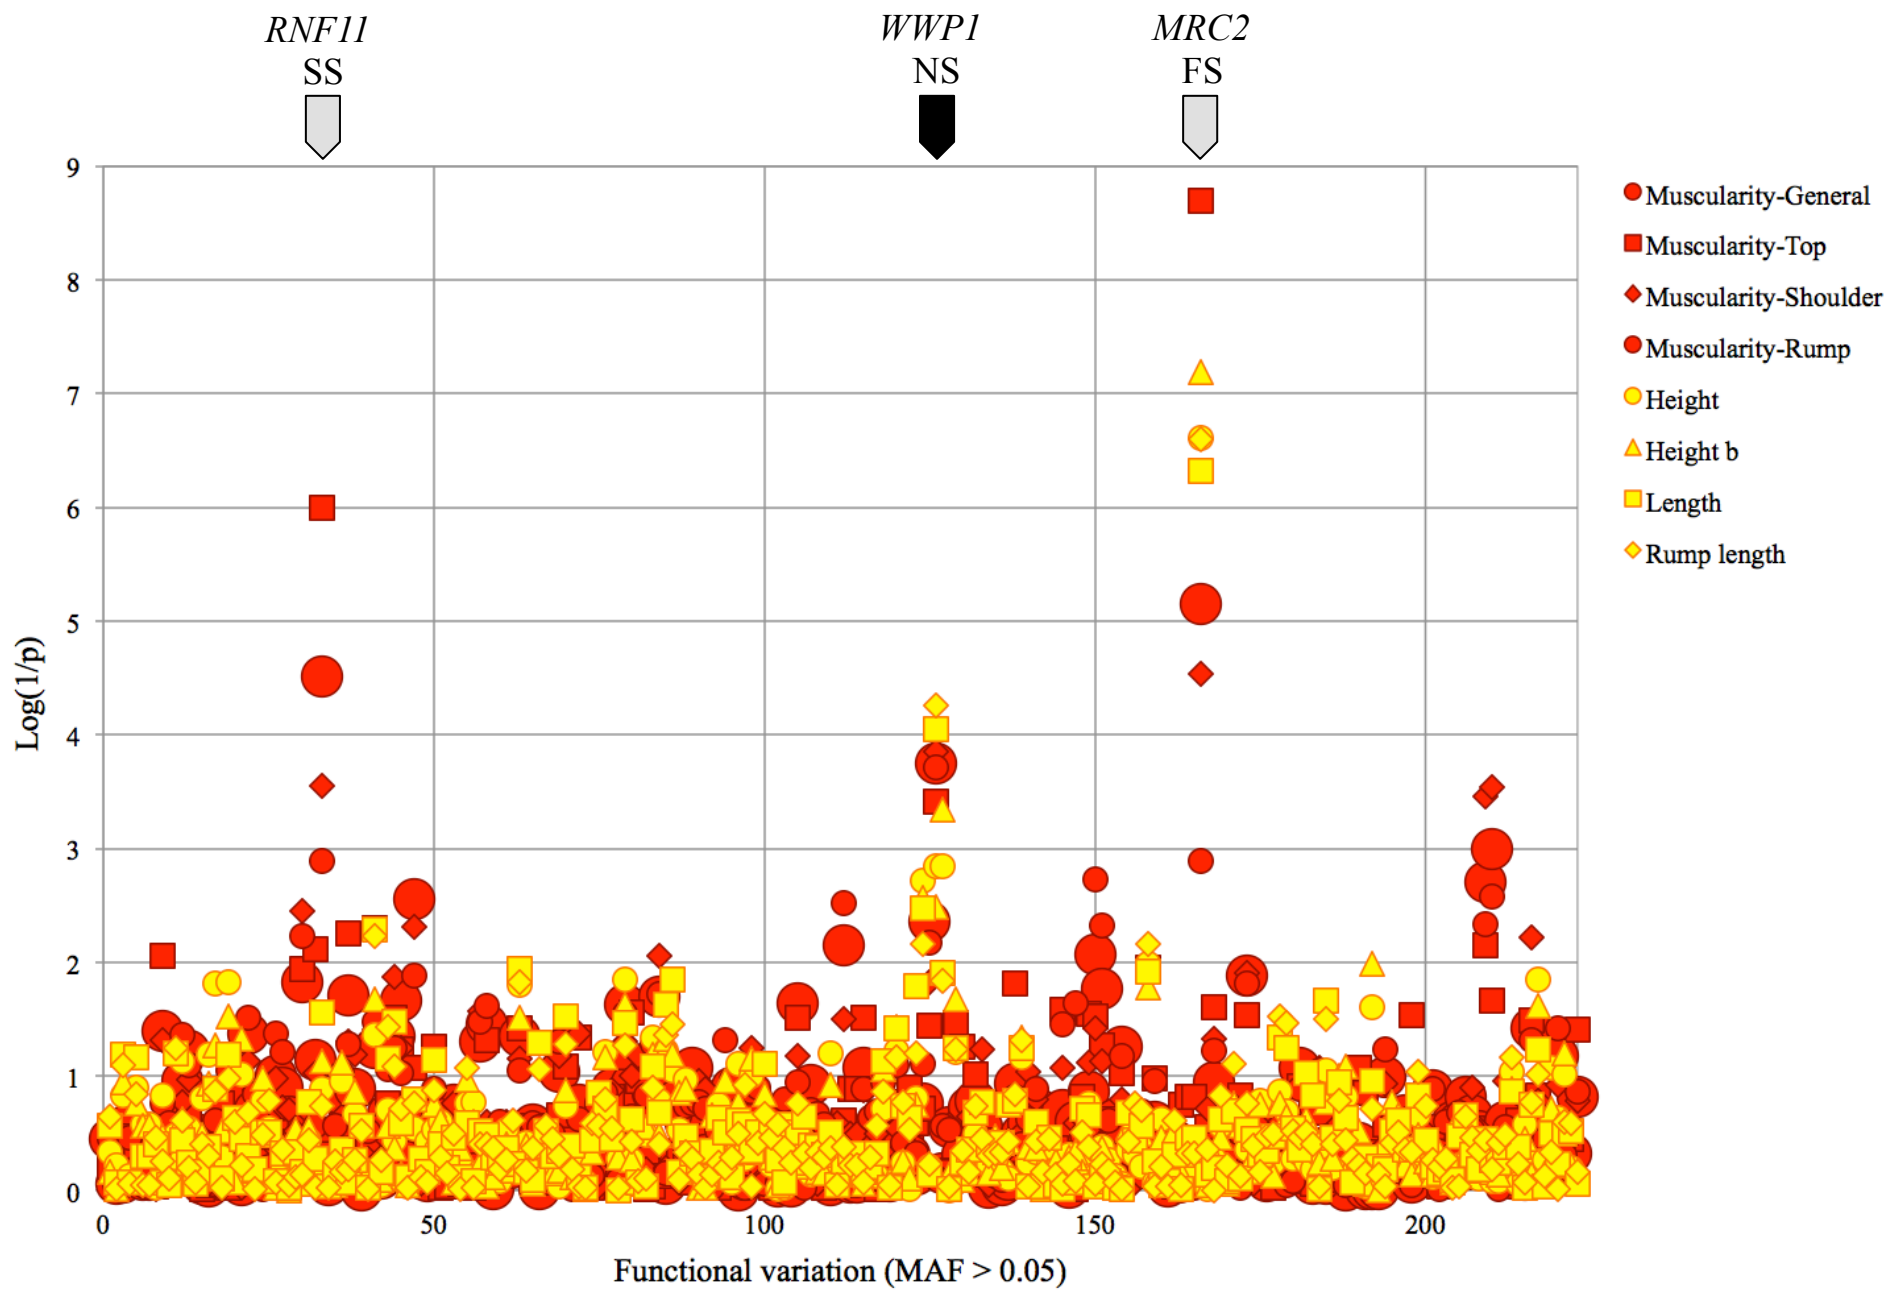

**Supplemental Figure S2:** GWAS conducted in 580 BBC bulls using breeding values for eight traits pertaining to muscularity and stature and genotypes for 223 LoF and missense variants (MAF>5%) sorted according to their genomic position. The two strongest signals correspond to the previously identified frame-shift (FS) *MRC2*<sup>1</sup> and splice-site (SS) *RNF11*<sup>2</sup> mutations, causing Crooked tail Syndrome and Growth Stunting, respectively. The third signal corresponds to the newly identified R844Q non-synonymous (NS) mutation in the *WWP1* gene. The statistical model used was as in Druet et al.<sup>3</sup>.

1. Fasquelle et al. Balancing selection of a frame-shift mutation in the *MRC2* gene accounts for the outbreak of the Crooked Tail Syndrome in Belgian Blue Cattle. *PLoS Genetics* 5: e1000666 (2009).
2. Sartelet et al. A splice site variant in the bovine *RNF11* gene compromises growth and regulation of the inflammatory response. *PLoS Genetics* 8: e1002581 (2012).
3. Druet et al. Selection in action: dissecting the molecular underpinnings of the increasing muscle mass of Belgian Blue Cattle. *BMC Genomics* 15: 796 (2014).
