# Supplementary material for: NGS-based reverse genetic screen for common embryonic lethal mutations compromising fertility in livestock
Source: HighWire-hosted journal article supplement (doi:10.1101/gr.207076.116), 2016-09-19
Supplement: Supplemental_Table_S1.xlsx [file Supplemental_Table_S1.xlsx]

## Sheet: BBC_coding_SNPs
BBC coding SNPs
Chromosome	Position	Reference allele	Alternative allele	Transcript_ID, Gene_ID	Amino acide change	Annotation
chr1	70226	C	T	ENSBTAT00000052762, ENSBTAG00000039257	R->H	missense
chr1	70600	T	C	ENSBTAT00000052762, ENSBTAG00000039257	H->R	missense
chr1	70675	T	C	ENSBTAT00000052762, ENSBTAG00000039257	N->S	missense
chr1	70715	G	A	ENSBTAT00000052762, ENSBTAG00000039257	R->*	stop-gain
chr1	70826	A	T	ENSBTAT00000052762, ENSBTAG00000039257	F->I	missense
chr1	124921	T	C	ENSBTAT00000002299, ENSBTAG00000001753	T->A	missense
chr1	179024	C	T	ENSBTAT00000002299, ENSBTAG00000001753	A->A	synonymous
chr1	179119	C	T	ENSBTAT00000002299, ENSBTAG00000001753	V->M	missense
chr1	179388	C	A	ENSBTAT00000002299, ENSBTAG00000001753	R->L	missense
chr1	179694	A	G	ENSBTAT00000002299, ENSBTAG00000001753	L->P	missense
chr1	264526	T	A	ENSBTAT00000007283, ENSBTAG00000005540	R->S	missense
chr1	264803	T	A	ENSBTAT00000007283, ENSBTAG00000005540	K->M	missense
chr1	264831	T	A	ENSBTAT00000007283, ENSBTAG00000005540	K->*	stop-gain
chr1	355093	T	C	ENSBTAT00000037243, ENSBTAG00000020035	Y->Y	synonymous
chr1	355093	T	C	NM_001034679, RCAN1	Y->Y	synonymous
chr1	357843	G	A	ENSBTAT00000037243, ENSBTAG00000020035	Q->Q	synonymous
chr1	357843	G	A	NM_001034679, RCAN1	Q->Q	synonymous
chr1	407146	T	C	ENSBTAT00000001530, ENSBTAG00000001150	A->A	synonymous
chr1	407146	T	C	NM_001077977, KCNE1	A->A	synonymous
chr1	407202	T	C	ENSBTAT00000001530, ENSBTAG00000001150	M->T	missense
chr1	407202	T	C	NM_001077977, KCNE1	M->T	missense
chr1	407227	G	A	ENSBTAT00000001530, ENSBTAG00000001150	P->P	synonymous
chr1	407227	G	A	NM_001077977, KCNE1	P->P	synonymous
chr1	407239	C	T	ENSBTAT00000001530, ENSBTAG00000001150	D->D	synonymous
chr1	407239	C	T	NM_001077977, KCNE1	D->D	synonymous
chr1	422252	G	A	ENSBTAT00000037244, ENSBTAG00000026259	C->Y	missense
chr1	422257	G	C	ENSBTAT00000037244, ENSBTAG00000026259	D->H	missense
chr1	460354	T	C	ENSBTAT00000018387, ENSBTAG00000013841	K->R	missense
chr1	460354	T	C	NM_001077124, MGC134427	K->R	missense
chr1	460375	G	T	ENSBTAT00000018387, ENSBTAG00000013841	A->E	missense
chr1	460375	G	T	NM_001077124, MGC134427	A->E	missense
chr1	460409	C	T	ENSBTAT00000018387, ENSBTAG00000013841	A->T	missense
chr1	460409	C	T	NM_001077124, MGC134427	A->T	missense
chr1	460554	T	G	ENSBTAT00000018387, ENSBTAG00000013841	T->T	synonymous
chr1	460554	T	G	NM_001077124, MGC134427	T->T	synonymous
chr1	460661	A	G	ENSBTAT00000018387, ENSBTAG00000013841	L->L	synonymous
chr1	460661	A	G	NM_001077124, MGC134427	L->L	synonymous
chr1	466250	T	C	ENSBTAT00000015319, ENSBTAG00000011528	K->K	synonymous
chr1	466250	T	C	NM_001114516, SMIM11	K->K	synonymous
chr1	466306	A	G	ENSBTAT00000015319, ENSBTAG00000011528	L->L	synonymous
chr1	466306	A	G	NM_001114516, SMIM11	L->L	synonymous
chr1	485206	C	T	ENSBTAT00000037245, ENSBTAG00000026260	R->H	missense
chr1	485206	C	T	NM_001077084, KCNE2	R->H	missense
chr1	559873	A	G	ENSBTAT00000064418, ENSBTAG00000045984	Q->R	missense
chr1	709892	A	G	NM_174607, SLC5A3	H->H	synonymous
chr1	709976	C	A	NM_174607, SLC5A3	E->D	missense
chr1	710093	C	T	NM_174607, SLC5A3	A->A	synonymous
chr1	710498	G	A	NM_174607, SLC5A3	I->I	synonymous
chr1	927309	G	A	ENSBTAT00000024326, ENSBTAG00000018278	K->K	synonymous
chr1	927309	G	A	NM_174244, ATP5O	K->K	synonymous
chr1	929460	G	A	ENSBTAT00000024326, ENSBTAG00000018278	A->T	missense
chr1	929460	G	A	NM_174244, ATP5O	A->T	missense
chr1	929522	G	A	ENSBTAT00000024326, ENSBTAG00000018278	K->K	synonymous
chr1	929522	G	A	NM_174244, ATP5O	K->K	synonymous
chr1	929525	A	G	ENSBTAT00000024326, ENSBTAG00000018278	L->L	synonymous
chr1	929525	A	G	NM_174244, ATP5O	L->L	synonymous
chr1	948299	A	G	ENSBTAT00000029333, ENSBTAG00000021997	C->C	synonymous
chr1	950374	G	A	ENSBTAT00000029333, ENSBTAG00000021997	I->I	synonymous
chr1	950774	C	A	ENSBTAT00000029333, ENSBTAG00000021997	A->A	synonymous
chr1	951873	C	T	ENSBTAT00000029333, ENSBTAG00000021997	E->E	synonymous
chr1	954066	T	C	ENSBTAT00000029333, ENSBTAG00000021997	N->S	missense
chr1	958050	T	C	ENSBTAT00000029333, ENSBTAG00000021997	S->S	synonymous
chr1	958055	A	G	ENSBTAT00000029333, ENSBTAG00000021997	L->L	synonymous
chr1	958125	A	G	ENSBTAT00000029333, ENSBTAG00000021997	N->N	synonymous
chr1	958149	C	T	ENSBTAT00000029333, ENSBTAG00000021997	A->A	synonymous
chr1	966481	C	A	ENSBTAT00000029333, ENSBTAG00000021997	A->A	synonymous
chr1	975072	T	C	ENSBTAT00000029333, ENSBTAG00000021997	R->R	synonymous
chr1	998829	G	A	ENSBTAT00000029333, ENSBTAG00000021997	T->M	missense
chr1	998829	G	A	ENSBTAT00000065213, ENSBTAG00000021997	T->M	missense
chr1	1000947	T	C	ENSBTAT00000029333, ENSBTAG00000021997	T->T	synonymous
chr1	1000947	T	C	ENSBTAT00000065213, ENSBTAG00000021997	T->T	synonymous
chr1	1000956	C	T	ENSBTAT00000029333, ENSBTAG00000021997	P->P	synonymous
chr1	1000956	C	T	ENSBTAT00000065213, ENSBTAG00000021997	P->P	synonymous
chr1	1000983	T	C	ENSBTAT00000029333, ENSBTAG00000021997	T->T	synonymous
chr1	1000983	T	C	ENSBTAT00000065213, ENSBTAG00000021997	T->T	synonymous
chr1	1004483	T	C	ENSBTAT00000029333, ENSBTAG00000021997	K->K	synonymous
chr1	1004483	T	C	ENSBTAT00000065213, ENSBTAG00000021997	K->K	synonymous
chr1	1004522	C	T	ENSBTAT00000029333, ENSBTAG00000021997	Q->Q	synonymous
chr1	1004522	C	T	ENSBTAT00000065213, ENSBTAG00000021997	Q->Q	synonymous
chr1	1004561	C	T	ENSBTAT00000029333, ENSBTAG00000021997	A->A	synonymous
chr1	1004561	C	T	ENSBTAT00000065213, ENSBTAG00000021997	A->A	synonymous
chr1	1004562	G	A	ENSBTAT00000029333, ENSBTAG00000021997	A->V	missense
chr1	1004562	G	A	ENSBTAT00000065213, ENSBTAG00000021997	A->V	missense
chr1	1004564	G	A	ENSBTAT00000029333, ENSBTAG00000021997	I->I	synonymous
chr1	1004564	G	A	ENSBTAT00000065213, ENSBTAG00000021997	I->I	synonymous
chr1	1016577	G	A	ENSBTAT00000029333, ENSBTAG00000021997	D->D	synonymous
chr1	1016577	G	A	ENSBTAT00000065213, ENSBTAG00000021997	D->D	synonymous
chr1	1016637	T	C	ENSBTAT00000029333, ENSBTAG00000021997	A->A	synonymous
chr1	1016637	T	C	ENSBTAT00000065213, ENSBTAG00000021997	A->A	synonymous
chr1	1022608	A	G	ENSBTAT00000029333, ENSBTAG00000021997	C->R	missense
chr1	1022608	A	G	ENSBTAT00000065213, ENSBTAG00000021997	C->R	missense
chr1	1071700	C	T	ENSBTAT00000029333, ENSBTAG00000021997	K->K	synonymous
chr1	1071700	C	T	ENSBTAT00000065213, ENSBTAG00000021997	K->K	synonymous
chr1	1089073	T	C	ENSBTAT00000029333, ENSBTAG00000021997	I->V	missense
chr1	1089073	T	C	ENSBTAT00000065213, ENSBTAG00000021997	I->V	missense
chr1	1089173	T	C	ENSBTAT00000029333, ENSBTAG00000021997	V->V	synonymous
chr1	1089173	T	C	ENSBTAT00000065213, ENSBTAG00000021997	V->V	synonymous
chr1	1111267	T	C	ENSBTAT00000029333, ENSBTAG00000021997	E->G	missense
chr1	1111267	T	C	ENSBTAT00000065213, ENSBTAG00000021997	E->G	missense
chr1	1114143	G	A	ENSBTAT00000029333, ENSBTAG00000021997	P->P	synonymous
chr1	1114143	G	A	ENSBTAT00000065213, ENSBTAG00000021997	P->P	synonymous
chr1	1223900	G	T	ENSBTAT00000049671, ENSBTAG00000035175	G->W	missense
chr1	1223900	G	T	ENSBTAT00000049667, ENSBTAG00000035175	R->L	missense
chr1	1223900	G	T	NM_001083445, DONSON	R->L	missense
chr1	1224188	G	A	ENSBTAT00000049671, ENSBTAG00000035175	R->K	missense
chr1	1225753	C	T	ENSBTAT00000049667, ENSBTAG00000035175	L->L	synonymous
chr1	1225753	C	T	ENSBTAT00000049671, ENSBTAG00000035175	L->L	synonymous
chr1	1225753	C	T	NM_001083445, DONSON	L->L	synonymous
chr1	1226934	T	C	ENSBTAT00000049667, ENSBTAG00000035175	H->H	synonymous
chr1	1226934	T	C	ENSBTAT00000049671, ENSBTAG00000035175	H->H	synonymous
chr1	1226934	T	C	NM_001083445, DONSON	H->H	synonymous
chr1	1228277	G	T	ENSBTAT00000049667, ENSBTAG00000035175	D->Y	missense
chr1	1228277	G	T	ENSBTAT00000049671, ENSBTAG00000035175	D->Y	missense
chr1	1228277	G	T	NM_001083445, DONSON	D->Y	missense
chr1	1231574	C	G	ENSBTAT00000049667, ENSBTAG00000035175	S->C	missense
chr1	1231574	C	G	ENSBTAT00000049671, ENSBTAG00000035175	S->C	missense
chr1	1231574	C	G	NM_001083445, DONSON	S->C	missense
chr1	1235585	G	A	ENSBTAT00000011175, ENSBTAG00000008482	S->S	synonymous
chr1	1235585	G	A	NM_001083694, SON	S->S	synonymous
chr1	1253984	A	G	ENSBTAT00000011175, ENSBTAG00000008482	S->S	synonymous
chr1	1253984	A	G	NM_001083694, SON	S->S	synonymous
chr1	1254284	C	T	ENSBTAT00000011175, ENSBTAG00000008482	P->P	synonymous
chr1	1254284	C	T	NM_001083694, SON	P->P	synonymous
chr1	1254533	G	A	ENSBTAT00000011175, ENSBTAG00000008482	G->G	synonymous
chr1	1254533	G	A	NM_001083694, SON	G->G	synonymous
chr1	1254885	G	A	ENSBTAT00000011175, ENSBTAG00000008482	A->V	missense
chr1	1254885	G	A	NM_001083694, SON	A->V	missense
chr1	1254918	G	A	ENSBTAT00000011175, ENSBTAG00000008482	P->L	missense
chr1	1254918	G	A	NM_001083694, SON	P->L	missense
chr1	1255146	A	G	ENSBTAT00000011175, ENSBTAG00000008482	V->A	missense
chr1	1255146	A	G	NM_001083694, SON	V->A	missense
chr1	1255177	C	G	ENSBTAT00000011175, ENSBTAG00000008482	V->L	missense
chr1	1255177	C	G	NM_001083694, SON	V->L	missense
chr1	1255477	T	C	ENSBTAT00000011175, ENSBTAG00000008482	I->V	missense
chr1	1255477	T	C	NM_001083694, SON	I->V	missense
chr1	1256174	A	C	ENSBTAT00000011175, ENSBTAG00000008482	S->S	synonymous
chr1	1256174	A	C	NM_001083694, SON	S->S	synonymous
chr1	1256422	C	T	ENSBTAT00000011175, ENSBTAG00000008482	A->T	missense
chr1	1256422	C	T	NM_001083694, SON	A->T	missense
chr1	1258523	C	T	ENSBTAT00000011175, ENSBTAG00000008482	L->L	synonymous
chr1	1258523	C	T	NM_001083694, SON	L->L	synonymous
chr1	1258941	G	A	ENSBTAT00000011175, ENSBTAG00000008482	P->L	missense
chr1	1258941	G	A	NM_001083694, SON	P->L	missense
chr1	1259003	C	T	ENSBTAT00000011175, ENSBTAG00000008482	T->T	synonymous
chr1	1259003	C	T	NM_001083694, SON	T->T	synonymous
chr1	1274831	C	T	ENSBTAT00000012108, ENSBTAG00000009188	F->F	synonymous
chr1	1274831	C	T	NM_001040473, GART	F->F	synonymous
chr1	1276674	A	G	ENSBTAT00000012108, ENSBTAG00000009188	P->P	synonymous
chr1	1276674	A	G	NM_001040473, GART	P->P	synonymous
chr1	1277474	G	A	ENSBTAT00000012108, ENSBTAG00000009188	D->N	missense
chr1	1277474	G	A	NM_001040473, GART	D->N	missense
chr1	1280573	G	T	ENSBTAT00000012108, ENSBTAG00000009188	A->S	missense
chr1	1280573	G	T	NM_001040473, GART	A->S	missense
chr1	1283152	T	C	ENSBTAT00000012108, ENSBTAG00000009188	G->G	synonymous
chr1	1283152	T	C	NM_001040473, GART	G->G	synonymous
chr1	1287657	A	G	ENSBTAT00000012108, ENSBTAG00000009188	K->E	missense
chr1	1287657	A	G	NM_001040473, GART	K->E	missense
chr1	1288846	A	G	ENSBTAT00000012108, ENSBTAG00000009188	P->P	synonymous
chr1	1288846	A	G	NM_001040473, GART	P->P	synonymous
chr1	1289881	A	G	ENSBTAT00000012108, ENSBTAG00000009188	S->S	synonymous
chr1	1289881	A	G	NM_001040473, GART	S->S	synonymous
chr1	1289971	G	C	ENSBTAT00000012108, ENSBTAG00000009188	G->G	synonymous
chr1	1289971	G	C	NM_001040473, GART	G->G	synonymous
chr1	1308538	G	C	ENSBTAT00000012106, ENSBTAG00000009187	T->T	synonymous
chr1	1308624	T	G	ENSBTAT00000012106, ENSBTAG00000009187	V->G	missense
chr1	1309122	G	A	ENSBTAT00000012106, ENSBTAG00000009187	R->Q	missense
chr1	1309357	A	G	ENSBTAT00000012106, ENSBTAG00000009187	A->A	synonymous
chr1	1309516	T	C	ENSBTAT00000012106, ENSBTAG00000009187	D->D	synonymous
chr1	1309528	A	G	ENSBTAT00000012106, ENSBTAG00000009187	E->E	synonymous
chr1	1309537	A	G	ENSBTAT00000012106, ENSBTAG00000009187	R->R	synonymous
chr1	1309550	T	A	ENSBTAT00000012106, ENSBTAG00000009187	Y->N	missense
chr1	1309551	A	G	ENSBTAT00000012106, ENSBTAG00000009187	Y->C	missense
chr1	1309569	T	C	ENSBTAT00000012106, ENSBTAG00000009187	I->T	missense
chr1	1309583	A	G	ENSBTAT00000012106, ENSBTAG00000009187	N->D	missense
chr1	1309597	T	A	ENSBTAT00000012106, ENSBTAG00000009187	N->K	missense
chr1	1343061	A	G	ENSBTAT00000001660, ENSBTAG00000001258	I->V	missense
chr1	1343061	A	G	NM_001034786, TMEM50B	I->V	missense
chr1	1346502	T	C	ENSBTAT00000001660, ENSBTAG00000001258	N->N	synonymous
chr1	1346502	T	C	NM_001034786, TMEM50B	N->N	synonymous
chr1	1376843	G	A	ENSBTAT00000017147, ENSBTAG00000012899	T->M	missense
chr1	1376880	T	A	ENSBTAT00000017147, ENSBTAG00000012899	T->S	missense
chr1	1376884	T	C	ENSBTAT00000017147, ENSBTAG00000012899	Q->Q	synonymous
chr1	1376932	A	G	ENSBTAT00000017147, ENSBTAG00000012899	S->S	synonymous
chr1	1376977	A	G	ENSBTAT00000017147, ENSBTAG00000012899	D->D	synonymous
chr1	1390505	T	C	ENSBTAT00000017147, ENSBTAG00000012899	R->G	missense
chr1	1471263	A	C	ENSBTAT00000029080, ENSBTAG00000021819	F->V	missense
chr1	1471263	A	C	NM_174552, IFNAR1	F->V	missense
chr1	1475148	G	A	ENSBTAT00000029080, ENSBTAG00000021819	S->S	synonymous
chr1	1475148	G	A	NM_174552, IFNAR1	S->S	synonymous
chr1	1480094	G	A	ENSBTAT00000029080, ENSBTAG00000021819	T->M	missense
chr1	1480094	G	A	NM_174552, IFNAR1	T->M	missense
chr1	1480240	C	T	ENSBTAT00000029080, ENSBTAG00000021819	V->I	missense
chr1	1480240	C	T	NM_174552, IFNAR1	V->I	missense
chr1	1482779	C	T	ENSBTAT00000029080, ENSBTAG00000021819	G->G	synonymous
chr1	1482779	C	T	NM_174552, IFNAR1	G->G	synonymous
chr1	1482803	C	T	ENSBTAT00000029080, ENSBTAG00000021819	T->T	synonymous
chr1	1482803	C	T	NM_174552, IFNAR1	T->T	synonymous
chr1	1564118	A	G	ENSBTAT00000025852, ENSBTAG00000019404	S->S	synonymous
chr1	1564118	A	G	NM_001076975, IL10RB	S->S	synonymous
chr1	1570144	C	T	ENSBTAT00000025852, ENSBTAG00000019404	P->P	synonymous
chr1	1570144	C	T	NM_001076975, IL10RB	P->P	synonymous
chr1	1577741	G	T	ENSBTAT00000025852, ENSBTAG00000019404	N->K	missense
chr1	1577741	G	T	NM_001076975, IL10RB	N->K	missense
chr1	1577769	C	T	ENSBTAT00000025852, ENSBTAG00000019404	R->Q	missense
chr1	1577769	C	T	NM_001076975, IL10RB	R->Q	missense
chr1	1577835	A	G	ENSBTAT00000025852, ENSBTAG00000019404	L->S	missense
chr1	1577835	A	G	NM_001076975, IL10RB	L->S	missense
chr1	1582897	T	C	ENSBTAT00000025852, ENSBTAG00000019404	Q->R	missense
chr1	1582897	T	C	NM_001076975, IL10RB	Q->R	missense
chr1	1582959	A	G	ENSBTAT00000025852, ENSBTAG00000019404	I->I	synonymous
chr1	1582959	A	G	NM_001076975, IL10RB	I->I	synonymous
chr1	1584650	C	T	ENSBTAT00000025852, ENSBTAG00000019404	L->L	synonymous
chr1	1584650	C	T	NM_001076975, IL10RB	L->L	synonymous
chr1	1591669	G	A	ENSBTAT00000025852, ENSBTAG00000019404	G->G	synonymous
chr1	1591669	G	A	NM_001076975, IL10RB	G->G	synonymous
chr1	1594284	C	T	ENSBTAT00000020239, ENSBTAG00000015212	E->K	missense
chr1	1594284	C	T	NM_174553, IFNAR2	E->K	missense
chr1	1594372	C	T	ENSBTAT00000020239, ENSBTAG00000015212	V->V	synonymous
chr1	1594372	C	T	NM_174553, IFNAR2	V->V	synonymous
chr1	1608032	A	G	ENSBTAT00000020239, ENSBTAG00000015212	V->A	missense
chr1	1608032	A	G	NM_174553, IFNAR2	V->A	missense
chr1	1608168	C	T	ENSBTAT00000020239, ENSBTAG00000015212	D->N	missense
chr1	1608168	C	T	NM_174553, IFNAR2	D->N	missense
chr1	1608175	G	C	ENSBTAT00000020239, ENSBTAG00000015212	V->V	synonymous
chr1	1608175	G	C	NM_174553, IFNAR2	V->V	synonymous
chr1	1611689	G	T	ENSBTAT00000020239, ENSBTAG00000015212	I->I	synonymous
chr1	1611689	G	T	NM_174553, IFNAR2	I->I	synonymous
chr1	1615121	T	A	ENSBTAT00000020239, ENSBTAG00000015212	M->L	missense
chr1	1615121	T	A	NM_174553, IFNAR2	M->L	missense
chr1	1776571	G	C	ENSBTAT00000054480, ENSBTAG00000037547	A->A	synonymous
chr1	1776571	G	C	NM_001206761, OLIG1	A->A	synonymous
chr1	1776970	G	A	ENSBTAT00000054480, ENSBTAG00000037547	H->H	synonymous
chr1	1776970	G	A	NM_001206761, OLIG1	H->H	synonymous
chr1	2047849	A	G	ENSBTAT00000061032, ENSBTAG00000043993	I->V	missense
chr1	2047849	A	G	NM_001163694, C1H21orf62	I->V	missense
chr1	2048097	G	A	ENSBTAT00000061032, ENSBTAG00000043993	K->K	synonymous
chr1	2048097	G	A	NM_001163694, C1H21orf62	K->K	synonymous
chr1	2048172	C	T	ENSBTAT00000061032, ENSBTAG00000043993	S->S	synonymous
chr1	2048172	C	T	NM_001163694, C1H21orf62	S->S	synonymous
chr1	2076954	A	G	ENSBTAT00000003986, ENSBTAG00000003064	T->T	synonymous
chr1	2076954	A	G	NM_001075689, GCFC1	T->T	synonymous
chr1	2077047	C	T	ENSBTAT00000003986, ENSBTAG00000003064	S->S	synonymous
chr1	2077047	C	T	NM_001075689, GCFC1	S->S	synonymous
chr1	2085310	A	G	ENSBTAT00000003986, ENSBTAG00000003064	T->T	synonymous
chr1	2085310	A	G	NM_001075689, GCFC1	T->T	synonymous
chr1	2094780	G	A	ENSBTAT00000003986, ENSBTAG00000003064	G->S	missense
chr1	2094780	G	A	NM_001075689, GCFC1	G->S	missense
chr1	2155063	A	G	ENSBTAT00000003984, ENSBTAG00000003063	S->G	missense
chr1	2155063	A	G	ENSBTAT00000003985, ENSBTAG00000003063	S->G	missense
chr1	2155063	A	G	NM_174468, SYNJ1	S->G	missense
chr1	2170759	A	G	ENSBTAT00000003984, ENSBTAG00000003063	P->P	synonymous
chr1	2170759	A	G	ENSBTAT00000003985, ENSBTAG00000003063	P->P	synonymous
chr1	2170759	A	G	NM_174468, SYNJ1	P->P	synonymous
chr1	2209470	T	C	ENSBTAT00000003977, ENSBTAG00000003059	S->S	synonymous
chr1	2209470	T	C	NM_001046407, C1H21orf59	S->S	synonymous
chr1	2214308	T	C	ENSBTAT00000003977, ENSBTAG00000003059	H->H	synonymous
chr1	2214308	T	C	NM_001046407, C1H21orf59	H->H	synonymous
chr1	2270727	G	T	ENSBTAT00000023019, ENSBTAG00000017310	G->G	synonymous
chr1	2270727	G	T	NM_001199027, EVA1C	G->G	synonymous
chr1	2283389	C	T	ENSBTAT00000023019, ENSBTAG00000017310	A->A	synonymous
chr1	2283389	C	T	NM_001199027, EVA1C	A->A	synonymous
chr1	2283401	C	T	ENSBTAT00000023019, ENSBTAG00000017310	S->S	synonymous
chr1	2283401	C	T	NM_001199027, EVA1C	S->S	synonymous
chr1	2296259	G	T	ENSBTAT00000023019, ENSBTAG00000017310	P->H	missense
chr1	2296259	G	T	NM_001199027, EVA1C	P->H	missense
chr1	2296372	G	A	ENSBTAT00000023019, ENSBTAG00000017310	H->H	synonymous
chr1	2296372	G	A	NM_001199027, EVA1C	H->H	synonymous
chr1	2359906	G	A	ENSBTAT00000023019, ENSBTAG00000017310	S->S	synonymous
chr1	2359906	G	A	NM_001199027, EVA1C	S->S	synonymous
chr1	2359942	G	A	ENSBTAT00000023019, ENSBTAG00000017310	L->L	synonymous
chr1	2359942	G	A	NM_001199027, EVA1C	L->L	synonymous
chr1	2386374	G	A	ENSBTAT00000016473, ENSBTAG00000012412	E->K	missense
chr1	2386374	G	A	NM_001205980, URB1	E->K	missense
chr1	2396140	A	G	ENSBTAT00000016473, ENSBTAG00000012412	E->E	synonymous
chr1	2396140	A	G	NM_001205980, URB1	E->E	synonymous
chr1	2397794	G	A	ENSBTAT00000016473, ENSBTAG00000012412	V->V	synonymous
chr1	2397794	G	A	NM_001205980, URB1	V->V	synonymous
chr1	2405215	C	G	ENSBTAT00000016473, ENSBTAG00000012412	I->M	missense
chr1	2405215	C	G	NM_001205980, URB1	I->M	missense
chr1	2407003	G	A	ENSBTAT00000016473, ENSBTAG00000012412	A->T	missense
chr1	2407003	G	A	NM_001205980, URB1	A->T	missense
chr1	2410819	C	G	ENSBTAT00000016473, ENSBTAG00000012412	H->Q	missense
chr1	2410819	C	G	NM_001205980, URB1	H->Q	missense
chr1	2410868	A	G	ENSBTAT00000016473, ENSBTAG00000012412	M->V	missense
chr1	2410868	A	G	NM_001205980, URB1	M->V	missense
chr1	2415018	A	C	ENSBTAT00000016473, ENSBTAG00000012412	P->P	synonymous
chr1	2415018	A	C	NM_001205980, URB1	P->P	synonymous
chr1	2415023	C	T	ENSBTAT00000016473, ENSBTAG00000012412	A->V	missense
chr1	2415023	C	T	NM_001205980, URB1	A->V	missense
chr1	2416670	T	C	ENSBTAT00000016473, ENSBTAG00000012412	M->T	missense
chr1	2416670	T	C	NM_001205980, URB1	M->T	missense
chr1	2416713	C	T	ENSBTAT00000016473, ENSBTAG00000012412	R->R	synonymous
chr1	2416713	C	T	NM_001205980, URB1	R->R	synonymous
chr1	2419709	C	T	ENSBTAT00000016473, ENSBTAG00000012412	T->T	synonymous
chr1	2419709	C	T	NM_001205980, URB1	T->T	synonymous
chr1	2419867	T	G	ENSBTAT00000016473, ENSBTAG00000012412	L->R	missense
chr1	2419867	T	G	NM_001205980, URB1	L->R	missense
chr1	2421824	C	G	ENSBTAT00000016473, ENSBTAG00000012412	D->E	missense
chr1	2421824	C	G	NM_001205980, URB1	D->E	missense
chr1	2421917	C	T	ENSBTAT00000016473, ENSBTAG00000012412	S->S	synonymous
chr1	2421917	C	T	NM_001205980, URB1	S->S	synonymous
chr1	2422866	C	T	ENSBTAT00000016473, ENSBTAG00000012412	R->W	missense
chr1	2422866	C	T	NM_001205980, URB1	R->W	missense
chr1	2422956	A	G	ENSBTAT00000016473, ENSBTAG00000012412	M->V	missense
chr1	2422956	A	G	NM_001205980, URB1	M->V	missense
chr1	2424473	A	G	ENSBTAT00000016473, ENSBTAG00000012412	Q->R	missense
chr1	2424473	A	G	NM_001205980, URB1	Q->R	missense
chr1	2424683	C	T	ENSBTAT00000016473, ENSBTAG00000012412	T->M	missense
chr1	2424683	C	T	NM_001205980, URB1	T->M	missense
chr1	2424824	C	T	ENSBTAT00000016473, ENSBTAG00000012412	P->L	missense
chr1	2424824	C	T	NM_001205980, URB1	P->L	missense
chr1	2424836	G	A	ENSBTAT00000016473, ENSBTAG00000012412	R->K	missense
chr1	2424836	G	A	NM_001205980, URB1	R->K	missense
chr1	2424846	T	C	ENSBTAT00000016473, ENSBTAG00000012412	T->T	synonymous
chr1	2424846	T	C	NM_001205980, URB1	T->T	synonymous
chr1	2424936	G	T	ENSBTAT00000016473, ENSBTAG00000012412	V->V	synonymous
chr1	2424936	G	T	NM_001205980, URB1	V->V	synonymous
chr1	2425177	C	A	ENSBTAT00000016473, ENSBTAG00000012412	R->R	synonymous
chr1	2425177	C	A	NM_001205980, URB1	R->R	synonymous
chr1	2426169	G	A	ENSBTAT00000016473, ENSBTAG00000012412	A->T	missense
chr1	2426169	G	A	NM_001205980, URB1	A->T	missense
chr1	2430476	C	T	ENSBTAT00000016473, ENSBTAG00000012412	T->T	synonymous
chr1	2430476	C	T	NM_001205980, URB1	T->T	synonymous
chr1	2432051	C	T	ENSBTAT00000016473, ENSBTAG00000012412	R->C	missense
chr1	2432051	C	T	NM_001205980, URB1	R->C	missense
chr1	2432099	C	A	ENSBTAT00000016473, ENSBTAG00000012412	Q->K	missense
chr1	2432099	C	A	NM_001205980, URB1	Q->K	missense
chr1	2436560	G	A	ENSBTAT00000016473, ENSBTAG00000012412	S->N	missense
chr1	2436560	G	A	NM_001205980, URB1	S->N	missense
chr1	2436571	G	C	ENSBTAT00000016473, ENSBTAG00000012412	A->P	missense
chr1	2436571	G	C	NM_001205980, URB1	A->P	missense
chr1	2437145	C	T	ENSBTAT00000016473, ENSBTAG00000012412	L->L	synonymous
chr1	2437145	C	T	NM_001205980, URB1	L->L	synonymous
chr1	2439309	G	A	ENSBTAT00000016473, ENSBTAG00000012412	L->L	synonymous
chr1	2439309	G	A	NM_001205980, URB1	L->L	synonymous
chr1	2439322	T	G	ENSBTAT00000016473, ENSBTAG00000012412	S->A->A	missense:MNP
chr1	2439322	T	G	NM_001205980, URB1	S->A->A	missense:MNP
chr1	2439324	G	T	ENSBTAT00000016473, ENSBTAG00000012412	S->S	synonymous
chr1	2439324	G	T	NM_001205980, URB1	S->S	synonymous
chr1	2439366	A	G	ENSBTAT00000016473, ENSBTAG00000012412	S->S	synonymous
chr1	2439366	A	G	NM_001205980, URB1	S->S	synonymous
chr1	2439387	T	C	ENSBTAT00000016473, ENSBTAG00000012412	V->V	synonymous
chr1	2439387	T	C	NM_001205980, URB1	V->V	synonymous
chr1	2439414	T	C	ENSBTAT00000016473, ENSBTAG00000012412	R->R	synonymous
chr1	2439414	T	C	NM_001205980, URB1	R->R	synonymous
chr1	2439469	C	G	ENSBTAT00000016473, ENSBTAG00000012412	P->A	missense
chr1	2439469	C	G	NM_001205980, URB1	P->A	missense
chr1	2439863	T	C	ENSBTAT00000016473, ENSBTAG00000012412	D->D	synonymous
chr1	2439863	T	C	NM_001205980, URB1	D->D	synonymous
chr1	2448578	G	A	ENSBTAT00000016473, ENSBTAG00000012412	A->A	synonymous
chr1	2448578	G	A	NM_001205980, URB1	A->A	synonymous
chr1	2448596	C	T	ENSBTAT00000016473, ENSBTAG00000012412	D->D	synonymous
chr1	2448596	C	T	NM_001205980, URB1	D->D	synonymous
chr1	2451087	G	C	ENSBTAT00000016473, ENSBTAG00000012412	K->N	missense
chr1	2451087	G	C	NM_001205980, URB1	K->N	missense
chr1	2452014	G	A	ENSBTAT00000016473, ENSBTAG00000012412	V->I	missense
chr1	2452014	G	A	NM_001205980, URB1	V->I	missense
chr1	2455161	C	A	ENSBTAT00000016473, ENSBTAG00000012412	N->K	missense
chr1	2455161	C	A	NM_001205980, URB1	N->K	missense
chr1	2455302	C	T	ENSBTAT00000016473, ENSBTAG00000012412	Y->Y	synonymous
chr1	2455302	C	T	NM_001205980, URB1	Y->Y	synonymous
chr1	2455320	G	A	ENSBTAT00000016473, ENSBTAG00000012412	T->T	synonymous
chr1	2455320	G	A	NM_001205980, URB1	T->T	synonymous
chr1	2456792	C	T	ENSBTAT00000016473, ENSBTAG00000012412	P->P	synonymous
chr1	2456792	C	T	NM_001205980, URB1	P->P	synonymous
chr1	2457684	C	T	ENSBTAT00000016473, ENSBTAG00000012412	L->L	synonymous
chr1	2457684	C	T	NM_001205980, URB1	L->L	synonymous
chr1	2457728	A	G	ENSBTAT00000016473, ENSBTAG00000012412	A->A	synonymous
chr1	2457728	A	G	NM_001205980, URB1	A->A	synonymous
chr1	2457729	G	A	ENSBTAT00000016473, ENSBTAG00000012412	G->S	missense
chr1	2457729	G	A	NM_001205980, URB1	G->S	missense
chr1	2457853	A	G	ENSBTAT00000016473, ENSBTAG00000012412	E->G	missense
chr1	2457853	A	G	NM_001205980, URB1	E->G	missense
chr1	2459252	C	T	ENSBTAT00000016473, ENSBTAG00000012412	T->I	missense
chr1	2459252	C	T	NM_001205980, URB1	T->I	missense
chr1	2466173	G	A	ENSBTAT00000032472, ENSBTAG00000023718	S->L	missense
chr1	2490314	G	A	ENSBTAT00000022106, ENSBTAG00000016619	C->Y	missense
chr1	2490314	G	A	NM_001098010, MIS18A	C->Y	missense
chr1	2490485	G	T	ENSBTAT00000022106, ENSBTAG00000016619	R->L	missense
chr1	2490485	G	T	NM_001098010, MIS18A	R->L	missense
chr1	2490580	G	A	ENSBTAT00000022106, ENSBTAG00000016619	A->T	missense
chr1	2490580	G	A	NM_001098010, MIS18A	A->T	missense
chr1	2781526	T	G	ENSBTAT00000027668, ENSBTAG00000020762	H->P	missense
chr1	2799647	T	C	ENSBTAT00000027668, ENSBTAG00000020762	I->V	missense
chr1	2870880	G	C	ENSBTAT00000027668, ENSBTAG00000020762	L->L	synonymous
chr1	2870886	G	A	ENSBTAT00000027668, ENSBTAG00000020762	T->T	synonymous
chr1	2870931	C	A	ENSBTAT00000027668, ENSBTAG00000020762	R->R	synonymous
chr1	2870946	A	G	ENSBTAT00000027668, ENSBTAG00000020762	V->V	synonymous
chr1	3072652	A	G	ENSBTAT00000025104, ENSBTAG00000018855	L->L	synonymous
chr1	3082169	A	G	ENSBTAT00000025104, ENSBTAG00000018855	T->A	missense
chr1	3082603	A	G	ENSBTAT00000025104, ENSBTAG00000018855	P->P	synonymous
chr1	3088519	T	C	ENSBTAT00000025104, ENSBTAG00000018855	D->D	synonymous
chr1	3096013	C	T	ENSBTAT00000025104, ENSBTAG00000018855	A->A	synonymous
chr1	3110718	T	C	ENSBTAT00000025104, ENSBTAG00000018855	G->G	synonymous
chr1	3110754	G	A	ENSBTAT00000025104, ENSBTAG00000018855	P->P	synonymous
chr1	3110838	G	T	ENSBTAT00000025104, ENSBTAG00000018855	P->P	synonymous
chr1	3110924	C	T	ENSBTAT00000025104, ENSBTAG00000018855	P->L	missense
chr1	3110961	T	G	ENSBTAT00000025104, ENSBTAG00000018855	P->P	synonymous
chr1	3564737	G	C	ENSBTAT00000023716, ENSBTAG00000017839	D->H	missense
chr1	3564737	G	C	ENSBTAT00000064124, ENSBTAG00000017839	D->H	missense
chr1	3564853	G	A	ENSBTAT00000023716, ENSBTAG00000017839	P->P	synonymous
chr1	3564853	G	A	ENSBTAT00000064124, ENSBTAG00000017839	P->P	synonymous
chr1	3581587	C	T	ENSBTAT00000023716, ENSBTAG00000017839	N->N	synonymous
chr1	3581587	C	T	ENSBTAT00000064124, ENSBTAG00000017839	N->N	synonymous
chr1	3581725	C	T	ENSBTAT00000023716, ENSBTAG00000017839	S->S	synonymous
chr1	3581725	C	T	ENSBTAT00000064124, ENSBTAG00000017839	S->S	synonymous
chr1	3581746	C	T	ENSBTAT00000023716, ENSBTAG00000017839	D->D	synonymous
chr1	3581746	C	T	ENSBTAT00000064124, ENSBTAG00000017839	D->D	synonymous
chr1	3581902	C	T	ENSBTAT00000023716, ENSBTAG00000017839	A->A	synonymous
chr1	3581902	C	T	ENSBTAT00000064124, ENSBTAG00000017839	A->A	synonymous
chr1	3588969	T	C	ENSBTAT00000023716, ENSBTAG00000017839	P->P	synonymous
chr1	3588969	T	C	ENSBTAT00000064124, ENSBTAG00000017839	P->P	synonymous
chr1	3589029	A	G	ENSBTAT00000023716, ENSBTAG00000017839	K->K	synonymous
chr1	3589029	A	G	ENSBTAT00000064124, ENSBTAG00000017839	K->K	synonymous
chr1	3603696	C	T	ENSBTAT00000023716, ENSBTAG00000017839	C->C	synonymous
chr1	3603696	C	T	ENSBTAT00000064124, ENSBTAG00000017839	C->C	synonymous
chr1	3603834	G	A	ENSBTAT00000023716, ENSBTAG00000017839	T->T	synonymous
chr1	3603834	G	A	ENSBTAT00000064124, ENSBTAG00000017839	T->T	synonymous
chr1	3615054	A	C	ENSBTAT00000023716, ENSBTAG00000017839	S->S	synonymous
chr1	3620694	C	T	ENSBTAT00000023716, ENSBTAG00000017839	V->V	synonymous
chr1	3644515	A	G	ENSBTAT00000023716, ENSBTAG00000017839	E->G	missense
chr1	3650208	C	T	ENSBTAT00000023716, ENSBTAG00000017839	A->V	missense
chr1	3650353	C	A	ENSBTAT00000023716, ENSBTAG00000017839	N->K	missense
chr1	3688121	G	A	ENSBTAT00000023716, ENSBTAG00000017839	L->L	synonymous
chr1	3715512	T	C	ENSBTAT00000023716, ENSBTAG00000017839	I->I	synonymous
chr1	3721485	G	A	ENSBTAT00000023716, ENSBTAG00000017839	G->E	missense
chr1	3721823	A	G	ENSBTAT00000023716, ENSBTAG00000017839	T->A	missense
chr1	3721873	C	T	ENSBTAT00000023716, ENSBTAG00000017839	V->V	synonymous
chr1	3972363	T	C	ENSBTAT00000049339, ENSBTAG00000034869	C->R	missense
chr1	3972363	T	C	NM_001080740, KRTAP11-1	C->R	missense
chr1	3972438	C	T	ENSBTAT00000049339, ENSBTAG00000034869	R->W	missense
chr1	3972438	C	T	NM_001080740, KRTAP11-1	R->W	missense
chr1	4036048	C	G	ENSBTAT00000066250, ENSBTAG00000046804	R->G	missense
chr1	4036062	C	T	ENSBTAT00000066250, ENSBTAG00000046804	C->C	synonymous
chr1	4059320	G	A	ENSBTAT00000021000, ENSBTAG00000015812	G->G	synonymous
chr1	4059332	C	T	ENSBTAT00000021000, ENSBTAG00000015812	Y->Y	synonymous
chr1	4257688	C	A	ENSBTAT00000061561, ENSBTAG00000044154	G->V	missense
chr1	4775275	T	A	ENSBTAT00000053288, ENSBTAG00000039602	F->I	missense
chr1	4775275	T	A	NM_001080350, KRTAP13-1	F->I	missense
chr1	4775608	C	G	ENSBTAT00000053288, ENSBTAG00000039602	R->G	missense
chr1	4775608	C	G	NM_001080350, KRTAP13-1	R->G	missense
chr1	4847014	C	T	ENSBTAT00000052636, ENSBTAG00000037933	R->C	missense
chr1	4847063	G	T	ENSBTAT00000052636, ENSBTAG00000037933	C->F	missense
chr1	4893501	C	A	ENSBTAT00000006318, ENSBTAG00000039597	T->T	synonymous
chr1	4893520	G	A	ENSBTAT00000006318, ENSBTAG00000039597	E->K	missense
chr1	4893554	G	A	ENSBTAT00000006318, ENSBTAG00000039597	C->Y	missense
chr1	4893695	A	G	ENSBTAT00000006318, ENSBTAG00000039597	Q->R	missense
chr1	4893748	C	T	ENSBTAT00000006318, ENSBTAG00000039597	P->S	missense
chr1	4893790	C	A	ENSBTAT00000006318, ENSBTAG00000039597	L->M	missense
chr1	4893797	G	A	ENSBTAT00000006318, ENSBTAG00000039597	C->Y	missense
chr1	4955651	T	C	ENSBTAT00000063306, ENSBTAG00000046384	S->S	synonymous
chr1	4955749	G	A	ENSBTAT00000063306, ENSBTAG00000046384	S->N	missense
chr1	4955871	A	G	ENSBTAT00000063306, ENSBTAG00000046384	I->V	missense
chr1	4955972	C	T	ENSBTAT00000063306, ENSBTAG00000046384	L->L	synonymous
chr1	4956018	A	T	ENSBTAT00000063306, ENSBTAG00000046384	S->C	missense
chr1	4956084	T	A	ENSBTAT00000063306, ENSBTAG00000046384	F->I	missense
chr1	5036027	C	T	ENSBTAT00000044994, ENSBTAG00000039820	A->V	missense
chr1	5036027	C	T	NM_001098096, CLDN8	A->V	missense
chr1	5036233	T	C	ENSBTAT00000044994, ENSBTAG00000039820	L->L	synonymous
chr1	5036233	T	C	NM_001098096, CLDN8	L->L	synonymous
chr1	5036248	G	T	ENSBTAT00000044994, ENSBTAG00000039820	A->S	missense
chr1	5036248	G	T	NM_001098096, CLDN8	A->S	missense
chr1	5036560	C	T	ENSBTAT00000044994, ENSBTAG00000039820	H->Y	missense
chr1	5036560	C	T	NM_001098096, CLDN8	H->Y	missense
chr1	5095915	C	A	ENSBTAT00000057398, ENSBTAG00000039255	L->L	synonymous
chr1	5096383	T	C	ENSBTAT00000057398, ENSBTAG00000039255	H->H	synonymous
chr1	5749907	C	T	ENSBTAT00000026817, ENSBTAG00000034854	S->S	synonymous
chr1	5749907	C	T	ENSBTAT00000026819, ENSBTAG00000034854	S->S	synonymous
chr1	5749907	C	T	NM_001102514, GRIK1	S->S	synonymous
chr1	5764307	G	A	ENSBTAT00000026817, ENSBTAG00000034854	S->S	synonymous
chr1	5764307	G	A	ENSBTAT00000026819, ENSBTAG00000034854	S->S	synonymous
chr1	5764307	G	A	NM_001102514, GRIK1	S->S	synonymous
chr1	5804471	C	T	ENSBTAT00000026817, ENSBTAG00000034854	I->I	synonymous
chr1	5804471	C	T	ENSBTAT00000026819, ENSBTAG00000034854	I->I	synonymous
chr1	5804471	C	T	NM_001102514, GRIK1	I->I	synonymous
chr1	5861522	C	G	ENSBTAT00000026817, ENSBTAG00000034854	L->L	synonymous
chr1	5861522	C	G	ENSBTAT00000026819, ENSBTAG00000034854	L->L	synonymous
chr1	5861522	C	G	NM_001102514, GRIK1	L->L	synonymous
chr1	5872553	G	A	ENSBTAT00000026817, ENSBTAG00000034854	A->A	synonymous
chr1	5872553	G	A	ENSBTAT00000026819, ENSBTAG00000034854	A->A	synonymous
chr1	5872553	G	A	NM_001102514, GRIK1	A->A	synonymous
chr1	5872562	G	A	ENSBTAT00000026817, ENSBTAG00000034854	L->L	synonymous
chr1	5872562	G	A	ENSBTAT00000026819, ENSBTAG00000034854	L->L	synonymous
chr1	5872562	G	A	NM_001102514, GRIK1	L->L	synonymous
chr1	5891460	G	A	ENSBTAT00000064697, ENSBTAG00000045873	A->V	missense
chr1	5900914	G	A	ENSBTAT00000026819, ENSBTAG00000034854	Q->Q	synonymous
chr1	6157681	C	G	ENSBTAT00000005416, ENSBTAG00000004139	G->R	missense
chr1	6157747	G	A	ENSBTAT00000005416, ENSBTAG00000004139	R->W	missense
chr1	6169303	A	G	ENSBTAT00000005416, ENSBTAG00000004139	V->A	missense
chr1	6169440	G	A	ENSBTAT00000005416, ENSBTAG00000004139	S->S	synonymous
chr1	6170050	A	T	ENSBTAT00000005416, ENSBTAG00000004139	V->E	missense
chr1	6174048	C	T	ENSBTAT00000005416, ENSBTAG00000004139	V->V	synonymous
chr1	6367404	C	T	ENSBTAT00000049195, ENSBTAG00000007444	T->T	synonymous
chr1	6480486	G	C	ENSBTAT00000018917, ENSBTAG00000014233	E->D	missense
chr1	6480486	G	C	NM_001033609, CCT8	E->D	missense
chr1	6485133	G	C	ENSBTAT00000018917, ENSBTAG00000014233	T->T	synonymous
chr1	6485133	G	C	NM_001033609, CCT8	T->T	synonymous
chr1	6491238	C	T	ENSBTAT00000026801, ENSBTAG00000020122	S->N	missense
chr1	6491238	C	T	NM_001076867, USP16	S->N	missense
chr1	6501192	A	G	ENSBTAT00000026801, ENSBTAG00000020122	D->D	synonymous
chr1	6501192	A	G	NM_001076867, USP16	D->D	synonymous
chr1	6530487	C	G	ENSBTAT00000026800, ENSBTAG00000020121	H->Q	missense
chr1	6530487	C	G	ENSBTAT00000065332, ENSBTAG00000020121	H->Q	missense
chr1	6530646	C	T	ENSBTAT00000026800, ENSBTAG00000020121	G->G	synonymous
chr1	6530646	C	T	ENSBTAT00000065332, ENSBTAG00000020121	G->G	synonymous
chr1	6532829	T	C	ENSBTAT00000026800, ENSBTAG00000020121	F->L	missense
chr1	6532829	T	C	ENSBTAT00000065332, ENSBTAG00000020121	F->L	missense
chr1	6546006	G	A	ENSBTAT00000032432, ENSBTAG00000000201	P->P	synonymous
chr1	6554502	G	A	ENSBTAT00000032432, ENSBTAG00000000201	P->P	synonymous
chr1	6554502	G	A	NM_001192509, LTN1	P->P	synonymous
chr1	6566224	T	C	ENSBTAT00000032432, ENSBTAG00000000201	A->A	synonymous
chr1	6566224	T	C	NM_001192509, LTN1	A->A	synonymous
chr1	6566440	C	T	ENSBTAT00000032432, ENSBTAG00000000201	S->S	synonymous
chr1	6566440	C	T	NM_001192509, LTN1	S->S	synonymous
chr1	6570130	A	G	ENSBTAT00000032432, ENSBTAG00000000201	A->A	synonymous
chr1	6570130	A	G	NM_001192509, LTN1	A->A	synonymous
chr1	6570283	T	C	ENSBTAT00000032432, ENSBTAG00000000201	L->L	synonymous
chr1	6570283	T	C	NM_001192509, LTN1	L->L	synonymous
chr1	6572800	T	G	ENSBTAT00000032432, ENSBTAG00000000201	V->V	synonymous
chr1	6572800	T	G	NM_001192509, LTN1	V->V	synonymous
chr1	6575288	C	T	ENSBTAT00000032432, ENSBTAG00000000201	T->M	missense
chr1	6575288	C	T	NM_001192509, LTN1	T->M	missense
chr1	6580070	T	C	ENSBTAT00000032432, ENSBTAG00000000201	V->A	missense
chr1	6580070	T	C	NM_001192509, LTN1	V->A	missense
chr1	6586438	C	T	ENSBTAT00000032432, ENSBTAG00000000201	T->I	missense
chr1	6586438	C	T	NM_001192509, LTN1	T->I	missense
chr1	6587228	C	T	ENSBTAT00000032432, ENSBTAG00000000201	L->F	missense
chr1	6587228	C	T	NM_001192509, LTN1	L->F	missense
chr1	6599122	A	G	ENSBTAT00000032432, ENSBTAG00000000201	N->S	missense
chr1	6599122	A	G	NM_001192509, LTN1	N->S	missense
chr1	6599207	C	G	ENSBTAT00000032432, ENSBTAG00000000201	L->L	synonymous
chr1	6599207	C	G	NM_001192509, LTN1	L->L	synonymous
chr1	6609333	T	C	ENSBTAT00000056346, ENSBTAG00000038433	S->S	synonymous
chr1	6609337	G	A	ENSBTAT00000056346, ENSBTAG00000038433	V->M	missense
chr1	6609521	G	A	ENSBTAT00000056346, ENSBTAG00000038433	S->N	missense
chr1	6630979	T	C	ENSBTAT00000001851, ENSBTAG00000001412	K->R	missense
chr1	6630979	T	C	NM_001083513, N6AMT1	K->R	missense
chr1	6632298	G	A	ENSBTAT00000001851, ENSBTAG00000001412	V->V	synonymous
chr1	6632298	G	A	NM_001083513, N6AMT1	V->V	synonymous
chr1	6635988	C	T	ENSBTAT00000001851, ENSBTAG00000001412	E->E	synonymous
chr1	6635988	C	T	NM_001083513, N6AMT1	E->E	synonymous
chr1	6643841	C	T	ENSBTAT00000001851, ENSBTAG00000001412	S->N	missense
chr1	6643841	C	T	NM_001083513, N6AMT1	S->N	missense
chr1	6643846	G	A	ENSBTAT00000001851, ENSBTAG00000001412	D->D	synonymous
chr1	6643846	G	A	NM_001083513, N6AMT1	D->D	synonymous
chr1	6643850	C	T	ENSBTAT00000001851, ENSBTAG00000001412	G->D	missense
chr1	6643850	C	T	NM_001083513, N6AMT1	G->D	missense
chr1	8328203	T	C	ENSBTAT00000056505, ENSBTAG00000040155	T->T	synonymous
chr1	8328287	T	C	ENSBTAT00000056505, ENSBTAG00000040155	T->T	synonymous
chr1	8811801	G	C	ENSBTAT00000000849, ENSBTAG00000000648	G->R	missense
chr1	8811801	G	C	NM_001166515, ADAMTS5	G->R	missense
chr1	8811929	T	C	ENSBTAT00000000849, ENSBTAG00000000648	R->R	synonymous
chr1	8811929	T	C	NM_001166515, ADAMTS5	R->R	synonymous
chr1	8812171	G	T	ENSBTAT00000000849, ENSBTAG00000000648	R->L	missense
chr1	8812171	G	T	NM_001166515, ADAMTS5	R->L	missense
chr1	8812229	A	C	ENSBTAT00000000849, ENSBTAG00000000648	A->A	synonymous
chr1	8812229	A	C	NM_001166515, ADAMTS5	A->A	synonymous
chr1	8812280	G	A	ENSBTAT00000000849, ENSBTAG00000000648	A->A	synonymous
chr1	8812280	G	A	NM_001166515, ADAMTS5	A->A	synonymous
chr1	8812336	C	A	ENSBTAT00000000849, ENSBTAG00000000648	A->E	missense
chr1	8812336	C	A	NM_001166515, ADAMTS5	A->E	missense
chr1	8812340	A	C	ENSBTAT00000000849, ENSBTAG00000000648	R->R	synonymous
chr1	8812340	A	C	NM_001166515, ADAMTS5	R->R	synonymous
chr1	8812886	G	T	ENSBTAT00000000849, ENSBTAG00000000648	A->A	synonymous
chr1	8812886	G	T	NM_001166515, ADAMTS5	A->A	synonymous
chr1	8847946	C	T	ENSBTAT00000000849, ENSBTAG00000000648	P->P	synonymous
chr1	8847946	C	T	NM_001166515, ADAMTS5	P->P	synonymous
chr1	8850109	A	G	ENSBTAT00000000849, ENSBTAG00000000648	P->P	synonymous
chr1	8850109	A	G	NM_001166515, ADAMTS5	P->P	synonymous
chr1	8850112	G	A	ENSBTAT00000000849, ENSBTAG00000000648	A->A	synonymous
chr1	8850112	G	A	NM_001166515, ADAMTS5	A->A	synonymous
chr1	8850133	T	C	ENSBTAT00000000849, ENSBTAG00000000648	Y->Y	synonymous
chr1	8850133	T	C	NM_001166515, ADAMTS5	Y->Y	synonymous
chr1	8850163	C	G	ENSBTAT00000000849, ENSBTAG00000000648	S->S	synonymous
chr1	8850163	C	G	NM_001166515, ADAMTS5	S->S	synonymous
chr1	8853168	G	A	ENSBTAT00000000849, ENSBTAG00000000648	G->S	missense
chr1	8853168	G	A	NM_001166515, ADAMTS5	G->S	missense
chr1	8853245	C	T	ENSBTAT00000000849, ENSBTAG00000000648	V->V	synonymous
chr1	8853245	C	T	NM_001166515, ADAMTS5	V->V	synonymous
chr1	8861529	G	A	ENSBTAT00000000849, ENSBTAG00000000648	R->Q	missense
chr1	8861529	G	A	NM_001166515, ADAMTS5	R->Q	missense
chr1	8956244	G	C	ENSBTAT00000000944, ENSBTAG00000000706	G->G	synonymous
chr1	8956244	G	C	NM_001101080, ADAMTS1	G->G	synonymous
chr1	8956297	C	G	ENSBTAT00000000944, ENSBTAG00000000706	P->R	missense
chr1	8956297	C	G	NM_001101080, ADAMTS1	P->R	missense
chr1	8958261	C	G	ENSBTAT00000000944, ENSBTAG00000000706	R->R	synonymous
chr1	8958261	C	G	NM_001101080, ADAMTS1	R->R	synonymous
chr1	8958950	T	C	ENSBTAT00000000944, ENSBTAG00000000706	-	splice-site
chr1	8958950	T	C	NM_001101080, ADAMTS1	-	splice-site
chr1	8959417	A	G	ENSBTAT00000000944, ENSBTAG00000000706	A->A	synonymous
chr1	8959417	A	G	NM_001101080, ADAMTS1	A->A	synonymous
chr1	8961932	T	C	ENSBTAT00000000944, ENSBTAG00000000706	S->S	synonymous
chr1	8961932	T	C	NM_001101080, ADAMTS1	S->S	synonymous
chr1	8962690	C	T	ENSBTAT00000000944, ENSBTAG00000000706	N->N	synonymous
chr1	8962690	C	T	NM_001101080, ADAMTS1	N->N	synonymous
chr1	9242733	G	A	ENSBTAT00000049039, ENSBTAG00000005742	P->P	synonymous
chr1	9242763	G	T	ENSBTAT00000049039, ENSBTAG00000005742	P->P	synonymous
chr1	9675980	C	T	ENSBTAT00000049004, ENSBTAG00000017753	D->D	synonymous
chr1	9675980	C	T	NM_001076796, APP	D->D	synonymous
chr1	9676001	G	A	ENSBTAT00000049004, ENSBTAG00000017753	A->A	synonymous
chr1	9676001	G	A	NM_001076796, APP	A->A	synonymous
chr1	9676058	C	T	ENSBTAT00000049004, ENSBTAG00000017753	N->N	synonymous
chr1	9676058	C	T	NM_001076796, APP	N->N	synonymous
chr1	9735824	T	C	ENSBTAT00000049004, ENSBTAG00000017753	S->S	synonymous
chr1	9735824	T	C	NM_001076796, APP	S->S	synonymous
chr1	9735848	G	A	ENSBTAT00000049004, ENSBTAG00000017753	K->K	synonymous
chr1	9735848	G	A	NM_001076796, APP	K->K	synonymous
chr1	9735893	C	T	ENSBTAT00000049004, ENSBTAG00000017753	H->H	synonymous
chr1	9735893	C	T	NM_001076796, APP	H->H	synonymous
chr1	9777660	A	T	ENSBTAT00000049004, ENSBTAG00000017753	Y->F	missense
chr1	9777660	A	T	NM_001076796, APP	Y->F	missense
chr1	9811844	T	C	ENSBTAT00000049004, ENSBTAG00000017753	R->R	synonymous
chr1	9811844	T	C	NM_001076796, APP	R->R	synonymous
chr1	9846174	C	T	ENSBTAT00000049004, ENSBTAG00000017753	L->L	synonymous
chr1	9846174	C	T	NM_001076796, APP	L->L	synonymous
chr1	9889246	G	A	ENSBTAT00000049004, ENSBTAG00000017753	V->M	missense
chr1	9889246	G	A	NM_001076796, APP	V->M	missense
chr1	9889321	G	A	ENSBTAT00000049004, ENSBTAG00000017753	V->M	missense
chr1	9889321	G	A	NM_001076796, APP	V->M	missense
chr1	9889326	C	T	ENSBTAT00000049004, ENSBTAG00000017753	P->P	synonymous
chr1	9889326	C	T	NM_001076796, APP	P->P	synonymous
chr1	9908019	C	T	ENSBTAT00000049004, ENSBTAG00000017753	D->D	synonymous
chr1	9908019	C	T	NM_001076796, APP	D->D	synonymous
chr1	10042961	C	G	ENSBTAT00000025345, ENSBTAG00000019043	P->P	synonymous
chr1	10042961	C	G	NM_001075437, GABPA	P->P	synonymous
chr1	10076192	C	T	ENSBTAT00000032427, ENSBTAG00000000605	T->M	missense
chr1	10076192	C	T	ENSBTAT00000066011, ENSBTAG00000000605	T->M	missense
chr1	10076192	C	T	NM_174717, ATP5J	T->M	missense
chr1	10099129	T	A	ENSBTAT00000000795, ENSBTAG00000000603	Q->H	missense
chr1	10099129	T	A	NM_001083736, JAM2	Q->H	missense
chr1	10201994	C	G	ENSBTAT00000026038, ENSBTAG00000019542	V->V	synonymous
chr1	10201994	C	G	NM_001080730, MRPL39	V->V	synonymous
chr1	10215468	C	A	ENSBTAT00000026038, ENSBTAG00000019542	R->R	synonymous
chr1	10215468	C	A	NM_001080730, MRPL39	R->R	synonymous
chr1	14801336	C	T	ENSBTAT00000034421, ENSBTAG00000003301	A->A	synonymous
chr1	14968501	G	C	ENSBTAT00000034421, ENSBTAG00000003301	L->L	synonymous
chr1	15011948	C	T	ENSBTAT00000034421, ENSBTAG00000003301	S->N	missense
chr1	15026522	A	G	ENSBTAT00000034421, ENSBTAG00000003301	Y->H	missense
chr1	18062599	C	T	ENSBTAT00000000788, ENSBTAG00000000597	S->S	synonymous
chr1	18062599	C	T	ENSBTAT00000064206, ENSBTAG00000000597	S->S	synonymous
chr1	18062599	C	T	NM_174439, TMPRSS15	S->S	synonymous
chr1	18073037	C	A	ENSBTAT00000000788, ENSBTAG00000000597	S->Y	missense
chr1	18073037	C	A	NM_174439, TMPRSS15	S->Y	missense
chr1	18094978	G	T	ENSBTAT00000000788, ENSBTAG00000000597	A->S	missense
chr1	18094978	G	T	ENSBTAT00000064206, ENSBTAG00000000597	A->S	missense
chr1	18094978	G	T	NM_174439, TMPRSS15	A->S	missense
chr1	18094978	G	A	ENSBTAT00000000788, ENSBTAG00000000597	A->T	missense
chr1	18094978	G	A	ENSBTAT00000064206, ENSBTAG00000000597	A->T	missense
chr1	18094978	G	A	NM_174439, TMPRSS15	A->T	missense
chr1	18107114	G	A	ENSBTAT00000000788, ENSBTAG00000000597	D->N	missense
chr1	18107114	G	A	ENSBTAT00000064206, ENSBTAG00000000597	D->N	missense
chr1	18107114	G	A	NM_174439, TMPRSS15	D->N	missense
chr1	18116424	G	A	ENSBTAT00000000788, ENSBTAG00000000597	Q->Q	synonymous
chr1	18116424	G	A	ENSBTAT00000064206, ENSBTAG00000000597	Q->Q	synonymous
chr1	18116424	G	A	NM_174439, TMPRSS15	Q->Q	synonymous
chr1	18153183	C	A	ENSBTAT00000000788, ENSBTAG00000000597	I->I	synonymous
chr1	18153183	C	A	ENSBTAT00000064206, ENSBTAG00000000597	I->I	synonymous
chr1	18153183	C	A	NM_174439, TMPRSS15	I->I	synonymous
chr1	18167066	T	A	ENSBTAT00000000788, ENSBTAG00000000597	I->K	missense
chr1	18167066	T	A	ENSBTAT00000064206, ENSBTAG00000000597	I->K	missense
chr1	18167066	T	A	NM_174439, TMPRSS15	I->K	missense
chr1	18171678	C	T	ENSBTAT00000000788, ENSBTAG00000000597	L->L	synonymous
chr1	18171678	C	T	ENSBTAT00000064206, ENSBTAG00000000597	L->L	synonymous
chr1	18171678	C	T	NM_174439, TMPRSS15	L->L	synonymous
chr1	18201899	T	C	ENSBTAT00000000788, ENSBTAG00000000597	Y->Y	synonymous
chr1	18201899	T	C	ENSBTAT00000064206, ENSBTAG00000000597	Y->Y	synonymous
chr1	18201899	T	C	NM_174439, TMPRSS15	Y->Y	synonymous
chr1	18206515	G	A	ENSBTAT00000000788, ENSBTAG00000000597	T->T	synonymous
chr1	18206515	G	A	ENSBTAT00000064206, ENSBTAG00000000597	T->T	synonymous
chr1	18206515	G	A	NM_174439, TMPRSS15	T->T	synonymous
chr1	18206569	G	C	ENSBTAT00000000788, ENSBTAG00000000597	V->V	synonymous
chr1	18206569	G	C	ENSBTAT00000064206, ENSBTAG00000000597	V->V	synonymous
chr1	18206569	G	C	NM_174439, TMPRSS15	V->V	synonymous
chr1	18720716	C	A	ENSBTAT00000001832, ENSBTAG00000001395	I->I	synonymous
chr1	18720716	C	A	NM_001037617, C1H21orf91	I->I	synonymous
chr1	18748189	C	T	ENSBTAT00000001832, ENSBTAG00000001395	H->H	synonymous
chr1	18748189	C	T	NM_001037617, C1H21orf91	H->H	synonymous
chr1	18902920	G	C	ENSBTAT00000064919, ENSBTAG00000047943	S->C	missense
chr1	18903163	T	C	ENSBTAT00000064919, ENSBTAG00000047943	M->V	missense
chr1	18903236	C	T	ENSBTAT00000064919, ENSBTAG00000047943	E->K	missense
chr1	18903459	T	C	ENSBTAT00000064919, ENSBTAG00000047943	Y->C->R	missense:MNP
chr1	18903460	A	G	ENSBTAT00000064919, ENSBTAG00000047943	Y->H->R	missense:MNP
chr1	18903544	T	A	ENSBTAT00000064919, ENSBTAG00000047943	K->*	stop-gain
chr1	18903611	C	T	ENSBTAT00000064919, ENSBTAG00000047943	W->*	stop-gain
chr1	18904540	T	C	ENSBTAT00000064919, ENSBTAG00000047943	H->R	missense
chr1	18913086	T	C	ENSBTAT00000024895, ENSBTAG00000018704	I->I	synonymous
chr1	18913086	T	C	NM_001034722, BTG3	I->I	synonymous
chr1	18913111	A	C	ENSBTAT00000024895, ENSBTAG00000018704	R->R	synonymous
chr1	18913111	A	C	NM_001034722, BTG3	R->R	synonymous
chr1	18922899	G	A	ENSBTAT00000024895, ENSBTAG00000018704	P->P	synonymous
chr1	18922899	G	A	NM_001034722, BTG3	P->P	synonymous
chr1	18951609	C	T	ENSBTAT00000006400, ENSBTAG00000004869	E->E	synonymous
chr1	18951609	C	T	NM_174298, CXADR	E->E	synonymous
chr1	20742134	T	C	ENSBTAT00000025716, ENSBTAG00000019314	L->L	synonymous
chr1	20762485	G	A	ENSBTAT00000025716, ENSBTAG00000019314	P->L	missense
chr1	20792484	G	A	ENSBTAT00000025716, ENSBTAG00000019314	A->V	missense
chr1	20798814	C	T	ENSBTAT00000025716, ENSBTAG00000019314	-	splice-site
chr1	21695128	T	C	ENSBTAT00000065805, ENSBTAG00000047293	F->S	missense
chr1	21695432	G	A	ENSBTAT00000065805, ENSBTAG00000047293	T->T	synonymous
chr1	21695955	G	A	ENSBTAT00000065805, ENSBTAG00000047293	V->I	missense
chr1	21696054	G	A	ENSBTAT00000065805, ENSBTAG00000047293	A->T	missense
chr1	21696251	T	C	ENSBTAT00000065805, ENSBTAG00000047293	D->D	synonymous
chr1	21696374	C	G	ENSBTAT00000065805, ENSBTAG00000047293	N->K	missense
chr1	22158802	C	A	ENSBTAT00000003394, ENSBTAG00000002623	R->R	synonymous
chr1	22158802	C	A	NM_001035404, SAMSN1	R->R	synonymous
chr1	22161610	C	T	ENSBTAT00000003394, ENSBTAG00000002623	L->L	synonymous
chr1	22161610	C	T	NM_001035404, SAMSN1	L->L	synonymous
chr1	22161664	C	A	ENSBTAT00000003394, ENSBTAG00000002623	T->T	synonymous
chr1	22161664	C	A	NM_001035404, SAMSN1	T->T	synonymous
chr1	22298995	C	T	ENSBTAT00000017155, ENSBTAG00000012908	Y->Y	synonymous
chr1	22298995	C	T	NM_001038505, HSPA13	Y->Y	synonymous
chr1	22299582	A	G	ENSBTAT00000017155, ENSBTAG00000012908	N->S	missense
chr1	22299582	A	G	NM_001038505, HSPA13	N->S	missense
chr1	22456740	T	G	ENSBTAT00000048660, ENSBTAG00000034347	R->R	synonymous
chr1	22456740	T	G	NM_001040567, RBM11	R->R	synonymous
chr1	22456787	C	T	ENSBTAT00000048660, ENSBTAG00000034347	S->N	missense
chr1	22456787	C	T	NM_001040567, RBM11	S->N	missense
chr1	22456810	G	A	ENSBTAT00000048660, ENSBTAG00000034347	D->D	synonymous
chr1	22456810	G	A	NM_001040567, RBM11	D->D	synonymous
chr1	22456828	C	T	ENSBTAT00000048660, ENSBTAG00000034347	R->R	synonymous
chr1	22456828	C	T	NM_001040567, RBM11	R->R	synonymous
chr1	22456888	A	G	ENSBTAT00000048660, ENSBTAG00000034347	Y->Y	synonymous
chr1	22456888	A	G	NM_001040567, RBM11	Y->Y	synonymous
chr1	22457002	G	A	ENSBTAT00000048660, ENSBTAG00000034347	Y->Y	synonymous
chr1	22457002	G	A	NM_001040567, RBM11	Y->Y	synonymous
chr1	22497191	G	A	ENSBTAT00000053236, ENSBTAG00000038512	P->P	synonymous
chr1	22497191	G	A	NM_001105006, LIPI	P->P	synonymous
chr1	22497283	A	G	ENSBTAT00000053236, ENSBTAG00000038512	K->R	missense
chr1	22497283	A	G	NM_001105006, LIPI	K->R	missense
chr1	22497475	G	A	ENSBTAT00000053236, ENSBTAG00000038512	R->Q	missense
chr1	22497475	G	A	NM_001105006, LIPI	R->Q	missense
chr1	23995781	G	A	ENSBTAT00000064983, ENSBTAG00000046755	E->E	synonymous
chr1	23995883	A	G	ENSBTAT00000064983, ENSBTAG00000046755	P->P	synonymous
chr1	24439778	A	G	ENSBTAT00000048830, ENSBTAG00000010462	M->V	missense
chr1	24482687	C	T	ENSBTAT00000048830, ENSBTAG00000010462	N->N	synonymous
chr1	24500301	C	T	ENSBTAT00000048830, ENSBTAG00000010462	V->V	synonymous
chr1	24538146	G	A	ENSBTAT00000048830, ENSBTAG00000010462	P->P	synonymous
chr1	24538295	G	A	ENSBTAT00000048830, ENSBTAG00000010462	S->N	missense
chr1	24538296	T	C	ENSBTAT00000048830, ENSBTAG00000010462	S->S	synonymous
chr1	24538416	T	C	ENSBTAT00000048830, ENSBTAG00000010462	-	splice-site
chr1	24558181	T	C	ENSBTAT00000048830, ENSBTAG00000010462	V->V	synonymous
chr1	24558218	G	T	ENSBTAT00000048830, ENSBTAG00000010462	A->S	missense
chr1	24563017	A	G	ENSBTAT00000048830, ENSBTAG00000010462	P->P	synonymous
chr1	25628330	T	C	ENSBTAT00000048615, ENSBTAG00000009851	N->S	missense
chr1	25628330	T	C	ENSBTAT00000061264, ENSBTAG00000009851	N->S	missense
chr1	25628330	T	C	NM_001192888, ROBO1	N->S	missense
chr1	25641618	G	A	ENSBTAT00000048615, ENSBTAG00000009851	V->V	synonymous
chr1	25641618	G	A	ENSBTAT00000061264, ENSBTAG00000009851	V->V	synonymous
chr1	25641618	G	A	NM_001192888, ROBO1	V->V	synonymous
chr1	25641762	G	A	ENSBTAT00000048615, ENSBTAG00000009851	Y->Y	synonymous
chr1	25641762	G	A	ENSBTAT00000061264, ENSBTAG00000009851	Y->Y	synonymous
chr1	25641762	G	A	NM_001192888, ROBO1	Y->Y	synonymous
chr1	25663122	C	T	ENSBTAT00000048615, ENSBTAG00000009851	T->T	synonymous
chr1	25663122	C	T	ENSBTAT00000061264, ENSBTAG00000009851	T->T	synonymous
chr1	25663122	C	T	NM_001192888, ROBO1	T->T	synonymous
chr1	25663197	G	A	ENSBTAT00000048615, ENSBTAG00000009851	A->A	synonymous
chr1	25663197	G	A	ENSBTAT00000061264, ENSBTAG00000009851	A->A	synonymous
chr1	25663197	G	A	NM_001192888, ROBO1	A->A	synonymous
chr1	25675973	A	G	ENSBTAT00000048615, ENSBTAG00000009851	Y->Y	synonymous
chr1	25675973	A	G	ENSBTAT00000061264, ENSBTAG00000009851	Y->Y	synonymous
chr1	25675973	A	G	NM_001192888, ROBO1	Y->Y	synonymous
chr1	25680251	T	C	ENSBTAT00000048615, ENSBTAG00000009851	Q->Q	synonymous
chr1	25680251	T	C	ENSBTAT00000061264, ENSBTAG00000009851	Q->Q	synonymous
chr1	25680251	T	C	NM_001192888, ROBO1	Q->Q	synonymous
chr1	25683767	C	T	ENSBTAT00000048615, ENSBTAG00000009851	E->E	synonymous
chr1	25683767	C	T	ENSBTAT00000061264, ENSBTAG00000009851	E->E	synonymous
chr1	25683767	C	T	NM_001192888, ROBO1	E->E	synonymous
chr1	25683818	A	G	ENSBTAT00000048615, ENSBTAG00000009851	L->L	synonymous
chr1	25683818	A	G	ENSBTAT00000061264, ENSBTAG00000009851	L->L	synonymous
chr1	25683818	A	G	NM_001192888, ROBO1	L->L	synonymous
chr1	25684982	A	C	ENSBTAT00000048615, ENSBTAG00000009851	V->G	missense
chr1	25684982	A	C	ENSBTAT00000061264, ENSBTAG00000009851	V->G	missense
chr1	25684982	A	C	NM_001192888, ROBO1	V->G	missense
chr1	25686011	G	C	ENSBTAT00000048615, ENSBTAG00000009851	Q->E	missense
chr1	25686011	G	C	ENSBTAT00000061264, ENSBTAG00000009851	Q->E	missense
chr1	25686011	G	C	NM_001192888, ROBO1	Q->E	missense
chr1	25692336	C	T	ENSBTAT00000048615, ENSBTAG00000009851	T->T	synonymous
chr1	25692336	C	T	ENSBTAT00000061264, ENSBTAG00000009851	T->T	synonymous
chr1	25692336	C	T	NM_001192888, ROBO1	T->T	synonymous
chr1	25709881	T	C	ENSBTAT00000048615, ENSBTAG00000009851	E->E	synonymous
chr1	25709881	T	C	ENSBTAT00000061264, ENSBTAG00000009851	E->E	synonymous
chr1	25709881	T	C	NM_001192888, ROBO1	E->E	synonymous
chr1	25709928	G	A	ENSBTAT00000048615, ENSBTAG00000009851	R->C	missense
chr1	25709928	G	A	ENSBTAT00000061264, ENSBTAG00000009851	R->C	missense
chr1	25709928	G	A	NM_001192888, ROBO1	R->C	missense
chr1	25738191	A	T	ENSBTAT00000048615, ENSBTAG00000009851	A->A	synonymous
chr1	25738191	A	T	ENSBTAT00000061264, ENSBTAG00000009851	A->A	synonymous
chr1	25738191	A	T	NM_001192888, ROBO1	A->A	synonymous
chr1	25738290	T	C	ENSBTAT00000048615, ENSBTAG00000009851	R->R	synonymous
chr1	25738290	T	C	ENSBTAT00000061264, ENSBTAG00000009851	R->R	synonymous
chr1	25738290	T	C	NM_001192888, ROBO1	R->R	synonymous
chr1	25740765	C	T	ENSBTAT00000048615, ENSBTAG00000009851	R->K	missense
chr1	25740765	C	T	ENSBTAT00000061264, ENSBTAG00000009851	R->K	missense
chr1	25740765	C	T	NM_001192888, ROBO1	R->K	missense
chr1	26210255	G	A	ENSBTAT00000061264, ENSBTAG00000009851	S->S	synonymous
chr1	26210255	G	A	NM_001192888, ROBO1	S->S	synonymous
chr1	26210477	C	A	ENSBTAT00000061264, ENSBTAG00000009851	S->S	synonymous
chr1	28611886	C	T	ENSBTAT00000011007, ENSBTAG00000008359	A->A	synonymous
chr1	28611949	G	T	ENSBTAT00000011007, ENSBTAG00000008359	S->S	synonymous
chr1	28611962	T	G	ENSBTAT00000011007, ENSBTAG00000008359	F->V	missense
chr1	28612077	T	G	ENSBTAT00000011007, ENSBTAG00000008359	L->W	missense
chr1	28612141	G	A	ENSBTAT00000011007, ENSBTAG00000008359	L->L	synonymous
chr1	28612150	A	G	ENSBTAT00000011007, ENSBTAG00000008359	G->G	synonymous
chr1	28612224	G	A	ENSBTAT00000011007, ENSBTAG00000008359	R->Q	missense
chr1	28667779	G	A	ENSBTAT00000050765, ENSBTAG00000036262	Y->Y	synonymous
chr1	28667779	G	A	NM_001122729, GBE1	Y->Y	synonymous
chr1	28763106	T	A	ENSBTAT00000050765, ENSBTAG00000036262	G->G	synonymous
chr1	28763106	T	A	NM_001122729, GBE1	G->G	synonymous
chr1	28809475	G	C	ENSBTAT00000050765, ENSBTAG00000036262	P->R	missense
chr1	28809475	G	C	NM_001122729, GBE1	P->R	missense
chr1	28809543	C	G	ENSBTAT00000050765, ENSBTAG00000036262	A->A	synonymous
chr1	28809543	C	G	NM_001122729, GBE1	A->A	synonymous
chr1	28833217	C	T	ENSBTAT00000050765, ENSBTAG00000036262	-	splice-site
chr1	28833957	C	T	ENSBTAT00000050765, ENSBTAG00000036262	-	splice-site
chr1	28853935	G	A	ENSBTAT00000050765, ENSBTAG00000036262	S->L	missense
chr1	30300874	C	T	ENSBTAT00000065610, ENSBTAG00000046383	L->L	synonymous
chr1	30300893	C	G	ENSBTAT00000065610, ENSBTAG00000046383	A->G	missense
chr1	30301094	A	G	ENSBTAT00000065610, ENSBTAG00000046383	H->R	missense
chr1	30301100	T	C	ENSBTAT00000065610, ENSBTAG00000046383	I->T	missense
chr1	30301111	G	A	ENSBTAT00000065610, ENSBTAG00000046383	G->R	missense
chr1	30301136	C	A	ENSBTAT00000065610, ENSBTAG00000046383	P->H	missense
chr1	30301153	C	G	ENSBTAT00000065610, ENSBTAG00000046383	Q->E	missense
chr1	30301173	G	A	ENSBTAT00000065610, ENSBTAG00000046383	E->E	synonymous
chr1	30301225	G	C	ENSBTAT00000065610, ENSBTAG00000046383	E->Q->Q	missense:MNP
chr1	30301227	A	G	ENSBTAT00000065610, ENSBTAG00000046383	E->E	synonymous
chr1	30301231	G	A	ENSBTAT00000065610, ENSBTAG00000046383	A->T	missense
chr1	30301234	C	T	ENSBTAT00000065610, ENSBTAG00000046383	P->S	missense
chr1	30301260	T	C	ENSBTAT00000065610, ENSBTAG00000046383	I->I	synonymous
chr1	30301261	G	A	ENSBTAT00000065610, ENSBTAG00000046383	A->T	missense
chr1	30301267	G	A	ENSBTAT00000065610, ENSBTAG00000046383	V->I->M	missense:MNP
chr1	30301269	T	G	ENSBTAT00000065610, ENSBTAG00000046383	V->V	synonymous
chr1	30301273	A	T	ENSBTAT00000065610, ENSBTAG00000046383	T->S->F	missense:MNP
chr1	30301274	C	T	ENSBTAT00000065610, ENSBTAG00000046383	T->I->F	missense:MNP
chr1	30301275	A	T	ENSBTAT00000065610, ENSBTAG00000046383	T->T	synonymous
chr1	30301278	C	G	ENSBTAT00000065610, ENSBTAG00000046383	D->E	missense
chr1	30301319	G	A	ENSBTAT00000065610, ENSBTAG00000046383	R->H	missense
chr1	30301619	A	T	ENSBTAT00000065610, ENSBTAG00000046383	Y->F	missense
chr1	30301621	T	G	ENSBTAT00000065610, ENSBTAG00000046383	S->A->D	missense:MNP
chr1	30301622	C	A	ENSBTAT00000065610, ENSBTAG00000046383	S->Y->D	missense:MNP
chr1	30301640	G	C	ENSBTAT00000065610, ENSBTAG00000046383	S->T	missense
chr1	30301690	T	G	ENSBTAT00000065610, ENSBTAG00000046383	F->V	missense
chr1	30301699	A	T	ENSBTAT00000065610, ENSBTAG00000046383	I->F	missense
chr1	30301705	C	T	ENSBTAT00000065610, ENSBTAG00000046383	H->Y	missense
chr1	30301742	A	C	ENSBTAT00000065610, ENSBTAG00000046383	H->P	missense
chr1	30301744	G	A	ENSBTAT00000065610, ENSBTAG00000046383	V->I	missense
chr1	30301763	G	C	ENSBTAT00000065610, ENSBTAG00000046383	C->S	missense
chr1	30301765	A	G	ENSBTAT00000065610, ENSBTAG00000046383	I->V	missense
chr1	30301766	T	C	ENSBTAT00000065610, ENSBTAG00000046383	I->T	missense
chr1	30301775	G	A	ENSBTAT00000065610, ENSBTAG00000046383	G->D	missense
chr1	30301776	C	T	ENSBTAT00000065610, ENSBTAG00000046383	G->G	synonymous
chr1	30301777	G	A	ENSBTAT00000065610, ENSBTAG00000046383	G->R	missense
chr1	30301783	T	C	ENSBTAT00000065610, ENSBTAG00000046383	C->R	missense
chr1	30301791	C	T	ENSBTAT00000065610, ENSBTAG00000046383	T->T	synonymous
chr1	30301808	C	T	ENSBTAT00000065610, ENSBTAG00000046383	P->L	missense
chr1	30301826	C	T	ENSBTAT00000065610, ENSBTAG00000046383	A->V	missense
chr1	30301846	G	A	ENSBTAT00000065610, ENSBTAG00000046383	G->S->S	missense:MNP
chr1	30301848	T	C	ENSBTAT00000065610, ENSBTAG00000046383	G->G	synonymous
chr1	30301849	G	A	ENSBTAT00000065610, ENSBTAG00000046383	A->T	missense
chr1	30301856	A	T	ENSBTAT00000065610, ENSBTAG00000046383	H->L	missense
chr1	30301856	A	G	ENSBTAT00000065610, ENSBTAG00000046383	H->R	missense
chr1	30301858	A	G	ENSBTAT00000065610, ENSBTAG00000046383	N->D	missense
chr1	30301860	C	A	ENSBTAT00000065610, ENSBTAG00000046383	N->K	missense
chr1	30301860	C	T	ENSBTAT00000065610, ENSBTAG00000046383	N->N	synonymous
chr1	30301861	A	G	ENSBTAT00000065610, ENSBTAG00000046383	N->D	missense
chr1	30301862	A	T	ENSBTAT00000065610, ENSBTAG00000046383	N->I	missense
chr1	30301878	T	G	ENSBTAT00000065610, ENSBTAG00000046383	S->S	synonymous
chr1	30304744	T	C	ENSBTAT00000065610, ENSBTAG00000046383	V->A	missense
chr1	30304829	G	A	ENSBTAT00000065610, ENSBTAG00000046383	P->P	synonymous
chr1	33285885	C	T	ENSBTAT00000012150, ENSBTAG00000009219	L->L	synonymous
chr1	33509030	T	C	ENSBTAT00000012150, ENSBTAG00000009219	L->L	synonymous
chr1	33509088	G	A	ENSBTAT00000012150, ENSBTAG00000009219	R->Q	missense
chr1	33509095	C	T	ENSBTAT00000012150, ENSBTAG00000009219	D->D	synonymous
chr1	33509110	T	C	ENSBTAT00000012150, ENSBTAG00000009219	G->G	synonymous
chr1	33561848	C	G	ENSBTAT00000012150, ENSBTAG00000009219	T->S	missense
chr1	34683650	A	C	ENSBTAT00000037060, ENSBTAG00000026156	I->R	missense
chr1	34683854	G	A	ENSBTAT00000037060, ENSBTAG00000026156	A->V	missense
chr1	34683854	G	A	NM_001191130, VGLL3	A->V	missense
chr1	34684137	T	C	ENSBTAT00000037060, ENSBTAG00000026156	T->A	missense
chr1	34684137	T	C	NM_001191130, VGLL3	T->A	missense
chr1	34996161	G	A	ENSBTAT00000010436, ENSBTAG00000007939	E->E	synonymous
chr1	34996161	G	A	NM_001035472, CHMP2B	E->E	synonymous
chr1	35009083	C	T	ENSBTAT00000012033, ENSBTAG00000009128	L->L	synonymous
chr1	35009083	C	T	ENSBTAT00000056643, ENSBTAG00000009128	L->L	synonymous
chr1	35009083	C	T	NM_174579, POU1F1	L->L	synonymous
chr1	35009240	G	T	ENSBTAT00000012033, ENSBTAG00000009128	A->D	missense
chr1	35009240	G	T	ENSBTAT00000056643, ENSBTAG00000009128	A->D	missense
chr1	35009240	G	T	NM_174579, POU1F1	A->D	missense
chr1	35013856	T	C	ENSBTAT00000012033, ENSBTAG00000009128	S->S	synonymous
chr1	35013856	T	C	ENSBTAT00000056643, ENSBTAG00000009128	S->S	synonymous
chr1	35013856	T	C	NM_174579, POU1F1	S->S	synonymous
chr1	35013897	A	G	ENSBTAT00000012033, ENSBTAG00000009128	L->L	synonymous
chr1	35013897	A	G	ENSBTAT00000056643, ENSBTAG00000009128	L->L	synonymous
chr1	35013897	A	G	NM_174579, POU1F1	L->L	synonymous
chr1	35017793	T	C	ENSBTAT00000012033, ENSBTAG00000009128	P->P	synonymous
chr1	35021020	C	T	ENSBTAT00000012033, ENSBTAG00000009128	S->S	synonymous
chr1	35021020	C	T	ENSBTAT00000056643, ENSBTAG00000009128	S->S	synonymous
chr1	35021020	C	T	NM_174579, POU1F1	S->S	synonymous
chr1	35603246	G	A	ENSBTAT00000052346, ENSBTAG00000039151	A->A	synonymous
chr1	35603246	G	A	NM_001206605, HTR1F	A->A	synonymous
chr1	35603324	T	A	ENSBTAT00000052346, ENSBTAG00000039151	G->G	synonymous
chr1	35603324	T	A	NM_001206605, HTR1F	G->G	synonymous
chr1	35603657	A	G	ENSBTAT00000052346, ENSBTAG00000039151	K->K	synonymous
chr1	35603657	A	G	NM_001206605, HTR1F	K->K	synonymous
chr1	35603666	G	A	ENSBTAT00000052346, ENSBTAG00000039151	K->K	synonymous
chr1	35603666	G	A	NM_001206605, HTR1F	K->K	synonymous
chr1	35603682	T	C	ENSBTAT00000052346, ENSBTAG00000039151	Y->H	missense
chr1	35603682	T	C	NM_001206605, HTR1F	Y->H	missense
chr1	35603780	G	A	ENSBTAT00000052346, ENSBTAG00000039151	P->P	synonymous
chr1	35603780	G	A	NM_001206605, HTR1F	P->P	synonymous
chr1	35603802	T	G	ENSBTAT00000052346, ENSBTAG00000039151	S->A	missense
chr1	35603802	T	G	NM_001206605, HTR1F	S->A	missense
chr1	35603901	G	A	ENSBTAT00000052346, ENSBTAG00000039151	G->S	missense
chr1	35603901	G	A	NM_001206605, HTR1F	G->S	missense
chr1	35660823	C	T	ENSBTAT00000032410, ENSBTAG00000023675	D->D	synonymous
chr1	35741383	C	G	ENSBTAT00000032410, ENSBTAG00000023675	Q->E	missense
chr1	35742414	T	C	ENSBTAT00000032410, ENSBTAG00000023675	H->H	synonymous
chr1	35758691	G	C	ENSBTAT00000010480, ENSBTAG00000007970	V->V	synonymous
chr1	35758691	G	C	NM_001206451, C1H3orf38	V->V	synonymous
chr1	36089555	T	C	ENSBTAT00000064629, ENSBTAG00000045590	I->T	missense
chr1	36089630	C	T	ENSBTAT00000064629, ENSBTAG00000045590	T->M	missense
chr1	36089875	T	G	ENSBTAT00000064629, ENSBTAG00000045590	S->A	missense
chr1	36090064	T	C	ENSBTAT00000064629, ENSBTAG00000045590	C->R->H	missense:MNP
chr1	36090065	G	A	ENSBTAT00000064629, ENSBTAG00000045590	C->Y->H	missense:MNP
chr1	37046602	G	A	ENSBTAT00000008955, ENSBTAG00000006811	G->D	missense
chr1	37046602	G	A	NM_001206113, EPHA3	G->D	missense
chr1	37046636	C	T	ENSBTAT00000008955, ENSBTAG00000006811	T->T	synonymous
chr1	37046636	C	T	NM_001206113, EPHA3	T->T	synonymous
chr1	37046654	C	T	ENSBTAT00000008955, ENSBTAG00000006811	T->T	synonymous
chr1	37046654	C	T	NM_001206113, EPHA3	T->T	synonymous
chr1	37071611	C	T	ENSBTAT00000008955, ENSBTAG00000006811	G->G	synonymous
chr1	37071611	C	T	NM_001206113, EPHA3	G->G	synonymous
chr1	37101849	G	A	ENSBTAT00000008955, ENSBTAG00000006811	A->A	synonymous
chr1	37101849	G	A	NM_001206113, EPHA3	A->A	synonymous
chr1	37808442	T	C	ENSBTAT00000032377, ENSBTAG00000023652	I->V	missense
chr1	37808442	T	C	NM_174438, PROS1	I->V	missense
chr1	37808456	C	G	ENSBTAT00000032377, ENSBTAG00000023652	G->A	missense
chr1	37808456	C	G	NM_174438, PROS1	G->A	missense
chr1	37824068	A	G	ENSBTAT00000032377, ENSBTAG00000023652	T->T	synonymous
chr1	37824068	A	G	NM_174438, PROS1	T->T	synonymous
chr1	37824101	A	G	ENSBTAT00000032377, ENSBTAG00000023652	V->V	synonymous
chr1	37824101	A	G	NM_174438, PROS1	V->V	synonymous
chr1	37838909	G	A	ENSBTAT00000032377, ENSBTAG00000023652	S->S	synonymous
chr1	37838909	G	A	NM_174438, PROS1	S->S	synonymous
chr1	37866892	G	C	ENSBTAT00000032377, ENSBTAG00000023652	T->T	synonymous
chr1	37866892	G	C	NM_174438, PROS1	T->T	synonymous
chr1	37890600	C	A	ENSBTAT00000006796, ENSBTAG00000005155	I->I	synonymous
chr1	37915619	C	T	ENSBTAT00000006804, ENSBTAG00000005162	A->T	missense
chr1	37915619	C	T	NM_001075672, STX19	A->T	missense
chr1	37937365	G	A	ENSBTAT00000006796, ENSBTAG00000005155	V->I	missense
chr1	37970651	C	T	ENSBTAT00000020876, ENSBTAG00000015728	Y->Y	synonymous
chr1	37970651	C	T	NM_001076001, NSUN3	Y->Y	synonymous
chr1	37979384	G	A	ENSBTAT00000020876, ENSBTAG00000015728	G->D	missense
chr1	37979384	G	A	NM_001076001, NSUN3	G->D	missense
chr1	40608744	C	T	ENSBTAT00000061591, ENSBTAG00000044111	P->S	missense
chr1	40608862	G	A	ENSBTAT00000061591, ENSBTAG00000044111	R->H	missense
chr1	40608924	A	T	ENSBTAT00000061591, ENSBTAG00000044111	R->W->S	missense:MNP
chr1	40608925	G	C	ENSBTAT00000061591, ENSBTAG00000044111	R->T->S	missense:MNP
chr1	40608934	C	A	ENSBTAT00000061591, ENSBTAG00000044111	T->K	missense
chr1	40701924	A	T	ENSBTAT00000061591, ENSBTAG00000044111	T->S	missense
chr1	40816120	C	T	ENSBTAT00000061591, ENSBTAG00000044111	T->T	synonymous
chr1	40996614	T	C	ENSBTAT00000061591, ENSBTAG00000044111	H->H	synonymous
chr1	41068439	A	G	ENSBTAT00000061591, ENSBTAG00000044111	N->S	missense
chr1	41278634	G	A	ENSBTAT00000061591, ENSBTAG00000044111	R->K	missense
chr1	41278652	G	A	ENSBTAT00000061591, ENSBTAG00000044111	R->Q	missense
chr1	41317166	C	T	ENSBTAT00000061591, ENSBTAG00000044111	T->T	synonymous
chr1	41608399	C	A	ENSBTAT00000061591, ENSBTAG00000044111	R->R	synonymous
chr1	41643965	G	A	ENSBTAT00000013306, ENSBTAG00000010091	L->L	synonymous
chr1	41643965	G	A	NM_001075782, ARL6	L->L	synonymous
chr1	41657287	A	G	ENSBTAT00000013306, ENSBTAG00000010091	K->R	missense
chr1	41657287	A	G	NM_001075782, ARL6	K->R	missense
chr1	41700199	C	T	ENSBTAT00000063463, ENSBTAG00000047147	P->S	missense
chr1	41745908	T	C	ENSBTAT00000063463, ENSBTAG00000047147	S->S	synonymous
chr1	41745955	T	G	ENSBTAT00000063463, ENSBTAG00000047147	F->C	missense
chr1	41753538	A	G	ENSBTAT00000063463, ENSBTAG00000047147	K->K	synonymous
chr1	41753634	C	G	ENSBTAT00000063463, ENSBTAG00000047147	S->S	synonymous
chr1	41754041	G	T	ENSBTAT00000063463, ENSBTAG00000047147	C->F	missense
chr1	41754144	A	G	ENSBTAT00000063463, ENSBTAG00000047147	G->G	synonymous
chr1	41754173	C	T	ENSBTAT00000063463, ENSBTAG00000047147	A->V	missense
chr1	41754458	C	A	ENSBTAT00000063463, ENSBTAG00000047147	P->Q	missense
chr1	41754493	G	A	ENSBTAT00000063463, ENSBTAG00000047147	A->T	missense
chr1	41754558	T	A	ENSBTAT00000063463, ENSBTAG00000047147	L->L	synonymous
chr1	41754736	T	C	ENSBTAT00000063463, ENSBTAG00000047147	S->P	missense
chr1	41754861	G	A	ENSBTAT00000063463, ENSBTAG00000047147	M->I	missense
chr1	41754955	C	T	ENSBTAT00000063463, ENSBTAG00000047147	P->S	missense
chr1	41755139	T	C	ENSBTAT00000063463, ENSBTAG00000047147	V->A	missense
chr1	41755249	T	C	ENSBTAT00000063463, ENSBTAG00000047147	F->L	missense
chr1	41755600	T	C	ENSBTAT00000063463, ENSBTAG00000047147	Y->H	missense
chr1	41755636	C	A	ENSBTAT00000063463, ENSBTAG00000047147	R->S	missense
chr1	41755993	C	T	ENSBTAT00000063463, ENSBTAG00000047147	P->S	missense
chr1	41756066	A	G	ENSBTAT00000063463, ENSBTAG00000047147	Y->C	missense
chr1	41756244	A	G	ENSBTAT00000063463, ENSBTAG00000047147	V->V	synonymous
chr1	41756294	C	T	ENSBTAT00000063463, ENSBTAG00000047147	A->V	missense
chr1	41756440	G	A	ENSBTAT00000063463, ENSBTAG00000047147	A->T	missense
chr1	41756531	G	A	ENSBTAT00000063463, ENSBTAG00000047147	S->N	missense
chr1	41756662	A	G	ENSBTAT00000063463, ENSBTAG00000047147	K->E	missense
chr1	41756715	A	T	ENSBTAT00000063463, ENSBTAG00000047147	K->N	missense
chr1	41756774	A	G	ENSBTAT00000063463, ENSBTAG00000047147	Q->R	missense
chr1	41756790	C	T	ENSBTAT00000063463, ENSBTAG00000047147	A->A	synonymous
chr1	41756905	T	C	ENSBTAT00000063463, ENSBTAG00000047147	L->L	synonymous
chr1	41758657	G	A	ENSBTAT00000032404, ENSBTAG00000008346	V->I	missense
chr1	41758833	C	T	ENSBTAT00000032404, ENSBTAG00000008346	D->D	synonymous
chr1	41758980	A	G	ENSBTAT00000032404, ENSBTAG00000008346	E->E	synonymous
chr1	41759051	A	C	ENSBTAT00000032404, ENSBTAG00000008346	Q->P	missense
chr1	41762409	C	A	ENSBTAT00000032404, ENSBTAG00000008346	R->S	missense
chr1	41768691	G	T	ENSBTAT00000032404, ENSBTAG00000008346	V->F	missense
chr1	41831717	G	A	ENSBTAT00000020656, ENSBTAG00000015546	T->T	synonymous
chr1	41831717	G	A	NM_001015675, MINA	T->T	synonymous
chr1	41845875	G	A	ENSBTAT00000020656, ENSBTAG00000015546	I->I	synonymous
chr1	41845875	G	A	NM_001015675, MINA	I->I	synonymous
chr1	41870291	A	G	ENSBTAT00000001857, ENSBTAG00000001416	M->T	missense
chr1	41870291	A	G	NM_001192519, GABRR3	M->T	missense
chr1	41870408	T	A	ENSBTAT00000001857, ENSBTAG00000001416	D->V->L	missense:MNP
chr1	41870408	T	A	NM_001192519, GABRR3	D->V->L	missense:MNP
chr1	41870409	C	G	ENSBTAT00000001857, ENSBTAG00000001416	D->H->L	missense:MNP
chr1	41870409	C	G	NM_001192519, GABRR3	D->H->L	missense:MNP
chr1	41870420	C	T	ENSBTAT00000001857, ENSBTAG00000001416	S->N	missense
chr1	41870420	C	T	NM_001192519, GABRR3	S->N	missense
chr1	41870434	G	T	ENSBTAT00000001857, ENSBTAG00000001416	G->G	synonymous
chr1	41870434	G	T	NM_001192519, GABRR3	G->G	synonymous
chr1	41890660	G	A	ENSBTAT00000001857, ENSBTAG00000001416	S->S	synonymous
chr1	41890660	G	A	NM_001192519, GABRR3	S->S	synonymous
chr1	41906843	A	G	ENSBTAT00000001857, ENSBTAG00000001416	Y->Y	synonymous
chr1	41906843	A	G	NM_001192519, GABRR3	Y->Y	synonymous
chr1	41906851	G	A	ENSBTAT00000001857, ENSBTAG00000001416	L->L	synonymous
chr1	41906851	G	A	NM_001192519, GABRR3	L->L	synonymous
chr1	41906886	C	T	ENSBTAT00000001857, ENSBTAG00000001416	R->K	missense
chr1	41906886	C	T	NM_001192519, GABRR3	R->K	missense
chr1	41955593	G	A	ENSBTAT00000032401, ENSBTAG00000023668	G->E	missense
chr1	41955795	C	A	ENSBTAT00000032401, ENSBTAG00000023668	V->V	synonymous
chr1	41955837	C	T	ENSBTAT00000032401, ENSBTAG00000023668	C->C	synonymous
chr1	41956008	G	A	ENSBTAT00000032401, ENSBTAG00000023668	L->L	synonymous
chr1	41956119	C	T	ENSBTAT00000032401, ENSBTAG00000023668	D->D	synonymous
chr1	41956212	C	T	ENSBTAT00000032401, ENSBTAG00000023668	L->L	synonymous
chr1	41956221	A	C	ENSBTAT00000032401, ENSBTAG00000023668	I->I	synonymous
chr1	41956266	C	T	ENSBTAT00000032401, ENSBTAG00000023668	T->T	synonymous
chr1	41956370	C	A	ENSBTAT00000032401, ENSBTAG00000023668	S->*	stop-gain
chr1	41997957	A	G	ENSBTAT00000064175, ENSBTAG00000047095	M->V	missense
chr1	41997959	G	T	ENSBTAT00000064175, ENSBTAG00000047095	M->I	missense
chr1	41997985	T	C	ENSBTAT00000064175, ENSBTAG00000047095	M->T	missense
chr1	41998061	C	T	ENSBTAT00000064175, ENSBTAG00000047095	Y->Y	synonymous
chr1	41998214	A	G	ENSBTAT00000064175, ENSBTAG00000047095	L->L	synonymous
chr1	41998276	A	G	ENSBTAT00000064175, ENSBTAG00000047095	N->S	missense
chr1	41998427	C	T	ENSBTAT00000064175, ENSBTAG00000047095	A->A	synonymous
chr1	41998442	G	T	ENSBTAT00000064175, ENSBTAG00000047095	L->F	missense
chr1	41998568	G	A	ENSBTAT00000064175, ENSBTAG00000047095	A->A	synonymous
chr1	41998862	A	G	ENSBTAT00000064175, ENSBTAG00000047095	R->R	synonymous
chr1	41998867	T	A	ENSBTAT00000064175, ENSBTAG00000047095	I->K	missense
chr1	42095473	A	T	ENSBTAT00000008047, ENSBTAG00000022908	I->F	missense
chr1	42095489	T	C	ENSBTAT00000008047, ENSBTAG00000022908	I->T	missense
chr1	42095536	A	G	ENSBTAT00000008047, ENSBTAG00000022908	I->V	missense
chr1	42095646	T	C	ENSBTAT00000008047, ENSBTAG00000022908	D->D	synonymous
chr1	42095848	A	G	ENSBTAT00000008047, ENSBTAG00000022908	N->D	missense
chr1	42095873	T	G	ENSBTAT00000008047, ENSBTAG00000022908	V->G	missense
chr1	42095937	G	A	ENSBTAT00000008047, ENSBTAG00000022908	T->T	synonymous
chr1	42096012	T	C	ENSBTAT00000008047, ENSBTAG00000022908	P->P	synonymous
chr1	42096035	C	T	ENSBTAT00000008047, ENSBTAG00000022908	S->F	missense
chr1	42096148	T	G	ENSBTAT00000008047, ENSBTAG00000022908	F->V	missense
chr1	42096339	A	G	ENSBTAT00000008047, ENSBTAG00000022908	L->L	synonymous
chr1	42119089	A	G	ENSBTAT00000018558, ENSBTAG00000027113	T->A	missense
chr1	42119091	G	A	ENSBTAT00000018558, ENSBTAG00000027113	T->T	synonymous
chr1	42119124	G	T	ENSBTAT00000018558, ENSBTAG00000027113	L->L	synonymous
chr1	42119136	A	G	ENSBTAT00000018558, ENSBTAG00000027113	I->M	missense
chr1	42119156	C	T	ENSBTAT00000018558, ENSBTAG00000027113	T->M	missense
chr1	42119177	T	C	ENSBTAT00000018558, ENSBTAG00000027113	V->A	missense
chr1	42119313	A	T	ENSBTAT00000018558, ENSBTAG00000027113	I->I	synonymous
chr1	42119326	T	G	ENSBTAT00000018558, ENSBTAG00000027113	C->G	missense
chr1	42119345	T	C	ENSBTAT00000018558, ENSBTAG00000027113	L->S	missense
chr1	42119355	C	T	ENSBTAT00000018558, ENSBTAG00000027113	V->V	synonymous
chr1	42119796	T	C	ENSBTAT00000018558, ENSBTAG00000027113	G->G	synonymous
chr1	42203188	T	A	ENSBTAT00000008053, ENSBTAG00000033437	V->E	missense
chr1	42203268	T	C	ENSBTAT00000008053, ENSBTAG00000033437	L->L	synonymous
chr1	42203398	G	C	ENSBTAT00000008053, ENSBTAG00000033437	W->S	missense
chr1	42203416	C	T	ENSBTAT00000008053, ENSBTAG00000033437	T->M	missense
chr1	42203592	A	G	ENSBTAT00000008053, ENSBTAG00000033437	T->A	missense
chr1	42203610	C	T	ENSBTAT00000008053, ENSBTAG00000033437	R->W	missense
chr1	42203823	G	A	ENSBTAT00000008053, ENSBTAG00000033437	V->I	missense
chr1	42203841	C	T	ENSBTAT00000008053, ENSBTAG00000033437	L->F	missense
chr1	42203913	C	T	ENSBTAT00000008053, ENSBTAG00000033437	H->Y	missense
chr1	42203940	A	G	ENSBTAT00000008053, ENSBTAG00000033437	R->G	missense
chr1	42308816	A	G	ENSBTAT00000065496, ENSBTAG00000047371	V->A	missense
chr1	42358224	T	C	ENSBTAT00000054123, ENSBTAG00000037820	M->T	missense
chr1	42358231	A	G	ENSBTAT00000054123, ENSBTAG00000037820	E->E	synonymous
chr1	42358320	C	T	ENSBTAT00000054123, ENSBTAG00000037820	T->I	missense
chr1	42358383	G	T	ENSBTAT00000054123, ENSBTAG00000037820	R->L	missense
chr1	42358414	G	T	ENSBTAT00000054123, ENSBTAG00000037820	G->G	synonymous
chr1	42358417	T	C	ENSBTAT00000054123, ENSBTAG00000037820	N->N	synonymous
chr1	42358421	G	A	ENSBTAT00000054123, ENSBTAG00000037820	A->T	missense
chr1	42358422	C	T	ENSBTAT00000054123, ENSBTAG00000037820	A->V	missense
chr1	42358437	G	A	ENSBTAT00000054123, ENSBTAG00000037820	C->Y	missense
chr1	42358504	C	T	ENSBTAT00000054123, ENSBTAG00000037820	L->L	synonymous
chr1	42358692	T	C	ENSBTAT00000054123, ENSBTAG00000037820	M->T	missense
chr1	42359000	G	A	ENSBTAT00000054123, ENSBTAG00000037820	V->I	missense
chr1	42359137	G	A	ENSBTAT00000054123, ENSBTAG00000037820	M->I	missense
chr1	42420126	G	A	ENSBTAT00000014524, ENSBTAG00000027782	G->S	missense
chr1	42452935	A	T	ENSBTAT00000027961, ENSBTAG00000020996	L->I	missense
chr1	42452935	A	T	NM_001206357, CLDND1	L->I	missense
chr1	42518717	G	A	ENSBTAT00000005398, ENSBTAG00000004124	R->C	missense
chr1	42518717	G	A	NM_001192393, CPOX	R->C	missense
chr1	42523931	G	A	ENSBTAT00000005398, ENSBTAG00000004124	L->L	synonymous
chr1	42523931	G	A	NM_001192393, CPOX	L->L	synonymous
chr1	42531106	C	A	ENSBTAT00000005398, ENSBTAG00000004124	A->A	synonymous
chr1	42531106	C	A	NM_001192393, CPOX	A->A	synonymous
chr1	42531181	C	G	ENSBTAT00000005398, ENSBTAG00000004124	A->A	synonymous
chr1	42531181	C	G	NM_001192393, CPOX	A->A	synonymous
chr1	42531250	G	A	ENSBTAT00000005398, ENSBTAG00000004124	R->R	synonymous
chr1	42531250	G	A	NM_001192393, CPOX	R->R	synonymous
chr1	42531352	A	G	ENSBTAT00000005398, ENSBTAG00000004124	C->C	synonymous
chr1	42531352	A	G	NM_001192393, CPOX	C->C	synonymous
chr1	42567036	T	C	ENSBTAT00000032398, ENSBTAG00000023666	Y->Y	synonymous
chr1	42567036	T	C	ENSBTAT00000064354, ENSBTAG00000023666	Y->Y	synonymous
chr1	42567046	A	G	ENSBTAT00000032398, ENSBTAG00000023666	I->V	missense
chr1	42567046	A	G	ENSBTAT00000064354, ENSBTAG00000023666	I->V	missense
chr1	42570066	G	A	ENSBTAT00000032398, ENSBTAG00000023666	R->R	synonymous
chr1	42570066	G	A	ENSBTAT00000064354, ENSBTAG00000023666	R->R	synonymous
chr1	42701574	G	A	ENSBTAT00000005868, ENSBTAG00000004471	K->K	synonymous
chr1	42701574	G	A	NM_001002883, ST3GAL6	K->K	synonymous
chr1	42701578	C	T	ENSBTAT00000005868, ENSBTAG00000004471	R->W	missense
chr1	42701578	C	T	NM_001002883, ST3GAL6	R->W	missense
chr1	42733166	G	A	ENSBTAT00000005868, ENSBTAG00000004471	P->P	synonymous
chr1	42733166	G	A	NM_001002883, ST3GAL6	P->P	synonymous
chr1	42737646	T	C	ENSBTAT00000005868, ENSBTAG00000004471	S->S	synonymous
chr1	42737646	T	C	NM_001002883, ST3GAL6	S->S	synonymous
chr1	42743955	C	T	ENSBTAT00000019822, ENSBTAG00000014889	E->K	missense
chr1	42743955	C	T	NM_001205911, DCBLD2	E->K	missense
chr1	42744175	G	A	ENSBTAT00000019822, ENSBTAG00000014889	T->T	synonymous
chr1	42744175	G	A	NM_001205911, DCBLD2	T->T	synonymous
chr1	42762328	C	T	ENSBTAT00000019822, ENSBTAG00000014889	M->I	missense
chr1	42762328	C	T	NM_001205911, DCBLD2	M->I	missense
chr1	42767019	C	T	ENSBTAT00000019822, ENSBTAG00000014889	V->M	missense
chr1	42767019	C	T	NM_001205911, DCBLD2	V->M	missense
chr1	42767463	T	C	ENSBTAT00000019822, ENSBTAG00000014889	I->V	missense
chr1	42767463	T	C	NM_001205911, DCBLD2	I->V	missense
chr1	42784052	A	G	ENSBTAT00000019822, ENSBTAG00000014889	H->H	synonymous
chr1	42784052	A	G	NM_001205911, DCBLD2	H->H	synonymous
chr1	42784130	A	G	ENSBTAT00000019822, ENSBTAG00000014889	C->C	synonymous
chr1	42784130	A	G	NM_001205911, DCBLD2	C->C	synonymous
chr1	42826045	C	A	NM_001205911, DCBLD2	S->I	missense
chr1	43709987	C	A	ENSBTAT00000018159, ENSBTAG00000013662	H->Q	missense
chr1	43709987	C	A	NM_001101176, COL8A1	H->Q	missense
chr1	43710017	A	G	ENSBTAT00000018159, ENSBTAG00000013662	L->L	synonymous
chr1	43710017	A	G	NM_001101176, COL8A1	L->L	synonymous
chr1	43710083	A	G	ENSBTAT00000018159, ENSBTAG00000013662	V->V	synonymous
chr1	43710083	A	G	NM_001101176, COL8A1	V->V	synonymous
chr1	43713039	T	C	ENSBTAT00000018159, ENSBTAG00000013662	G->G	synonymous
chr1	43713039	T	C	NM_001101176, COL8A1	G->G	synonymous
chr1	43714344	T	C	ENSBTAT00000018159, ENSBTAG00000013662	P->P	synonymous
chr1	43714344	T	C	NM_001101176, COL8A1	P->P	synonymous
chr1	43714480	G	A	ENSBTAT00000018159, ENSBTAG00000013662	G->S	missense
chr1	43714480	G	A	NM_001101176, COL8A1	G->S	missense
chr1	43730066	G	A	ENSBTAT00000018160, ENSBTAG00000013663	Q->Q	synonymous
chr1	43730066	G	A	NM_001038215, CMSS1	Q->Q	synonymous
chr1	43757547	C	T	ENSBTAT00000018161, ENSBTAG00000013664	R->H	missense
chr1	43758040	G	C	ENSBTAT00000018161, ENSBTAG00000013664	P->A	missense
chr1	43758684	C	T	ENSBTAT00000018161, ENSBTAG00000013664	R->H	missense
chr1	43759457	C	T	ENSBTAT00000018161, ENSBTAG00000013664	Q->Q	synonymous
chr1	43759529	T	C	ENSBTAT00000018161, ENSBTAG00000013664	K->K	synonymous
chr1	43760013	C	T	ENSBTAT00000018161, ENSBTAG00000013664	R->K	missense
chr1	44124239	A	G	ENSBTAT00000018160, ENSBTAG00000013663	N->S	missense
chr1	44124239	A	G	NM_001038215, CMSS1	N->S	missense
chr1	44140535	T	C	ENSBTAT00000018165, ENSBTAG00000013667	I->I	synonymous
chr1	44140535	T	C	NM_001038150, TMEM30C	I->I	synonymous
chr1	44199362	G	A	ENSBTAT00000032386, ENSBTAG00000015010	G->D	missense
chr1	44217502	A	G	ENSBTAT00000032386, ENSBTAG00000015010	N->S	missense
chr1	44228165	A	C	ENSBTAT00000032386, ENSBTAG00000015010	A->A	synonymous
chr1	44230697	C	T	ENSBTAT00000032386, ENSBTAG00000015010	D->D	synonymous
chr1	44232125	G	T	ENSBTAT00000032386, ENSBTAG00000015010	S->S	synonymous
chr1	44274183	C	T	ENSBTAT00000006347, ENSBTAG00000004833	S->L	missense
chr1	44274183	C	T	NM_001038133, NIT2	S->L	missense
chr1	44274748	T	C	ENSBTAT00000006347, ENSBTAG00000004833	F->F	synonymous
chr1	44274748	T	C	NM_001038133, NIT2	F->F	synonymous
chr1	44274754	G	A	ENSBTAT00000006347, ENSBTAG00000004833	E->E	synonymous
chr1	44274754	G	A	NM_001038133, NIT2	E->E	synonymous
chr1	44280575	G	A	ENSBTAT00000006347, ENSBTAG00000004833	V->M	missense
chr1	44280575	G	A	NM_001038133, NIT2	V->M	missense
chr1	44331501	A	G	ENSBTAT00000019001, ENSBTAG00000014302	A->A	synonymous
chr1	44331501	A	G	NM_001075328, TOMM70A	A->A	synonymous
chr1	44370135	C	T	ENSBTAT00000048786, ENSBTAG00000034442	L->L	synonymous
chr1	44370135	C	T	ENSBTAT00000064152, ENSBTAG00000034442	L->L	synonymous
chr1	44370135	C	T	NM_001205535, LNP1	L->L	synonymous
chr1	44450111	T	C	ENSBTAT00000017716, ENSBTAG00000013321	S->S	synonymous
chr1	44450111	T	C	NM_001105624, LOC529036	S->S	synonymous
chr1	44464498	C	T	ENSBTAT00000017716, ENSBTAG00000013321	N->N	synonymous
chr1	44464498	C	T	NM_001105624, LOC529036	N->N	synonymous
chr1	44464520	A	G	ENSBTAT00000017716, ENSBTAG00000013321	M->V	missense
chr1	44464520	A	G	NM_001105624, LOC529036	M->V	missense
chr1	44464615	C	T	ENSBTAT00000017716, ENSBTAG00000013321	T->T	synonymous
chr1	44464615	C	T	NM_001105624, LOC529036	T->T	synonymous
chr1	44464616	C	T	ENSBTAT00000017716, ENSBTAG00000013321	R->W	missense
chr1	44464616	C	T	NM_001105624, LOC529036	R->W	missense
chr1	44647741	C	G	ENSBTAT00000061194, ENSBTAG00000013806	G->R	missense
chr1	44647741	C	G	NM_001206608, EFHB	G->R	missense
chr1	44647744	C	T	ENSBTAT00000061194, ENSBTAG00000013806	D->N	missense
chr1	44647744	C	T	NM_001206608, EFHB	D->N	missense
chr1	44647884	G	A	ENSBTAT00000061194, ENSBTAG00000013806	S->L	missense
chr1	44647884	G	A	NM_001206608, EFHB	S->L	missense
chr1	44652857	G	A	ENSBTAT00000061194, ENSBTAG00000013806	P->S	missense
chr1	44652857	G	A	NM_001206608, EFHB	P->S	missense
chr1	44657432	T	C	ENSBTAT00000061194, ENSBTAG00000013806	K->R	missense
chr1	44657432	T	C	NM_001206608, EFHB	K->R	missense
chr1	44670588	A	C	ENSBTAT00000061194, ENSBTAG00000013806	F->C	missense
chr1	44670588	A	C	NM_001206608, EFHB	F->C	missense
chr1	44670604	A	G	ENSBTAT00000061194, ENSBTAG00000013806	Y->H	missense
chr1	44670604	A	G	NM_001206608, EFHB	Y->H	missense
chr1	44712132	C	T	ENSBTAT00000061194, ENSBTAG00000013806	G->E	missense
chr1	44712132	C	T	NM_001206608, EFHB	G->E	missense
chr1	44712213	A	G	ENSBTAT00000061194, ENSBTAG00000013806	M->T	missense
chr1	44712213	A	G	NM_001206608, EFHB	M->T	missense
chr1	44712252	A	G	ENSBTAT00000061194, ENSBTAG00000013806	L->P	missense
chr1	44712252	A	G	NM_001206608, EFHB	L->P	missense
chr1	44712299	C	G	ENSBTAT00000061194, ENSBTAG00000013806	R->S	missense
chr1	44712299	C	G	NM_001206608, EFHB	R->S	missense
chr1	44712520	A	G	ENSBTAT00000061194, ENSBTAG00000013806	L->L	synonymous
chr1	44712520	A	G	NM_001206608, EFHB	L->L	synonymous
chr1	44712874	G	C	NM_001206608, EFHB	L->V	missense
chr1	44712946	C	T	ENSBTAT00000061194, ENSBTAG00000013806	G->R	missense
chr1	44712946	C	T	NM_001206608, EFHB	G->R	missense
chr1	44747569	C	T	ENSBTAT00000064563, ENSBTAG00000046385	G->G	synonymous
chr1	44747569	C	T	NM_001076186, RAB5A	G->G	synonymous
chr1	44747578	C	T	ENSBTAT00000064563, ENSBTAG00000046385	A->A	synonymous
chr1	44747578	C	T	NM_001076186, RAB5A	A->A	synonymous
chr1	44755760	C	G	ENSBTAT00000005303, ENSBTAG00000004061	E->D	missense
chr1	44755898	T	C	ENSBTAT00000005303, ENSBTAG00000004061	T->T	synonymous
chr1	44755960	T	C	ENSBTAT00000005303, ENSBTAG00000004061	I->V	missense
chr1	44769802	C	T	ENSBTAT00000005303, ENSBTAG00000004061	V->M	missense
chr1	44769802	C	T	ENSBTAT00000065926, ENSBTAG00000004061	V->M	missense
chr1	44770665	C	T	ENSBTAT00000005303, ENSBTAG00000004061	-	splice-site
chr1	44770665	C	T	ENSBTAT00000065926, ENSBTAG00000004061	-	splice-site
chr1	44881000	A	G	ENSBTAT00000000994, ENSBTAG00000000746	I->V	missense
chr1	44881053	T	C	ENSBTAT00000000994, ENSBTAG00000000746	P->P	synonymous
chr1	44913915	G	A	ENSBTAT00000000994, ENSBTAG00000000746	D->N	missense
chr1	44922422	G	A	ENSBTAT00000000994, ENSBTAG00000000746	P->P	synonymous
chr1	44949225	C	T	ENSBTAT00000000999, ENSBTAG00000000752	T->T	synonymous
chr1	44949225	C	T	ENSBTAT00000001001, ENSBTAG00000000752	T->T	synonymous
chr1	44949225	C	T	NM_001081617, SGOL1	T->T	synonymous
chr1	44949271	C	T	ENSBTAT00000000999, ENSBTAG00000000752	R->H	missense
chr1	44949271	C	T	ENSBTAT00000001001, ENSBTAG00000000752	R->H	missense
chr1	44949271	C	T	NM_001081617, SGOL1	R->H	missense
chr1	44949329	T	C	ENSBTAT00000000999, ENSBTAG00000000752	T->A	missense
chr1	44949329	T	C	ENSBTAT00000001001, ENSBTAG00000000752	T->A	missense
chr1	44949329	T	C	NM_001081617, SGOL1	T->A	missense
chr1	44956629	C	T	ENSBTAT00000000999, ENSBTAG00000000752	T->T	synonymous
chr1	44956629	C	T	ENSBTAT00000001001, ENSBTAG00000000752	T->T	synonymous
chr1	44956629	C	T	NM_001081617, SGOL1	T->T	synonymous
chr1	44956977	C	T	ENSBTAT00000000999, ENSBTAG00000000752	A->A	synonymous
chr1	44956977	C	T	ENSBTAT00000001001, ENSBTAG00000000752	A->A	synonymous
chr1	44956977	C	T	NM_001081617, SGOL1	A->A	synonymous
chr1	44957068	T	C	ENSBTAT00000000999, ENSBTAG00000000752	Q->R	missense
chr1	44957068	T	C	ENSBTAT00000001001, ENSBTAG00000000752	Q->R	missense
chr1	44957068	T	C	NM_001081617, SGOL1	Q->R	missense
chr1	44957180	T	C	ENSBTAT00000000999, ENSBTAG00000000752	R->G	missense
chr1	44957180	T	C	ENSBTAT00000001001, ENSBTAG00000000752	R->G	missense
chr1	44957180	T	C	NM_001081617, SGOL1	R->G	missense
chr1	44957210	A	G	ENSBTAT00000000999, ENSBTAG00000000752	S->P	missense
chr1	44957210	A	G	ENSBTAT00000001001, ENSBTAG00000000752	S->P	missense
chr1	44957210	A	G	NM_001081617, SGOL1	S->P	missense
chr1	44957285	G	A	ENSBTAT00000000999, ENSBTAG00000000752	R->C	missense
chr1	44957285	G	A	ENSBTAT00000001001, ENSBTAG00000000752	R->C	missense
chr1	44957285	G	A	NM_001081617, SGOL1	R->C	missense
chr1	44963173	A	G	ENSBTAT00000001001, ENSBTAG00000000752	N->N	synonymous
chr1	44963908	G	A	ENSBTAT00000000999, ENSBTAG00000000752	A->V	missense
chr1	44963908	G	A	ENSBTAT00000001001, ENSBTAG00000000752	A->V	missense
chr1	44963908	G	A	NM_001081617, SGOL1	A->V	missense
chr1	45021294	G	A	ENSBTAT00000002795, ENSBTAG00000004538	P->P	synonymous
chr1	45021322	A	G	ENSBTAT00000002795, ENSBTAG00000004538	R->G	missense
chr1	45022211	A	T	ENSBTAT00000002795, ENSBTAG00000004538	P->P	synonymous
chr1	45028357	T	C	ENSBTAT00000002795, ENSBTAG00000004538	F->S	missense
chr1	45028440	G	A	ENSBTAT00000002795, ENSBTAG00000004538	G->R	missense
chr1	45029346	A	G	ENSBTAT00000002795, ENSBTAG00000004538	E->G	missense
chr1	45029660	A	G	ENSBTAT00000002795, ENSBTAG00000004538	S->G->D	missense:MNP
chr1	45029661	G	A	ENSBTAT00000002795, ENSBTAG00000004538	S->N->D	missense:MNP
chr1	45029699	A	G	ENSBTAT00000002795, ENSBTAG00000004538	I->V	missense
chr1	45031728	T	C	ENSBTAT00000002795, ENSBTAG00000004538	D->D	synonymous
chr1	45031848	C	T	ENSBTAT00000002795, ENSBTAG00000004538	L->L	synonymous
chr1	45031867	A	C	ENSBTAT00000002795, ENSBTAG00000004538	S->R	missense
chr1	45031889	G	C	ENSBTAT00000002795, ENSBTAG00000004538	G->A	missense
chr1	45033890	C	T	ENSBTAT00000002795, ENSBTAG00000004538	A->V	missense
chr1	45033900	G	A	ENSBTAT00000002795, ENSBTAG00000004538	V->V	synonymous
chr1	45033918	A	G	ENSBTAT00000002795, ENSBTAG00000004538	E->E	synonymous
chr1	45033942	G	A	ENSBTAT00000002795, ENSBTAG00000004538	P->P	synonymous
chr1	45074824	C	T	ENSBTAT00000005967, ENSBTAG00000004538	T->M	missense
chr1	45074824	C	T	NM_001101948, ZNF596	T->M	missense
chr1	45076083	G	T	ENSBTAT00000005967, ENSBTAG00000004538	V->L	missense
chr1	45076083	G	T	NM_001101948, ZNF596	V->L	missense
chr1	45077719	T	A	ENSBTAT00000005967, ENSBTAG00000004538	S->R	missense
chr1	45077719	T	A	NM_001101948, ZNF596	S->R	missense
chr1	45077853	G	T	ENSBTAT00000005967, ENSBTAG00000004538	G->V	missense
chr1	45077853	G	T	NM_001101948, ZNF596	G->V	missense
chr1	45078078	G	A	ENSBTAT00000002795, ENSBTAG00000004538	R->K	missense
chr1	45078078	G	A	ENSBTAT00000005967, ENSBTAG00000004538	R->K	missense
chr1	45078078	G	A	NM_001101948, ZNF596	R->K	missense
chr1	45078689	A	C	ENSBTAT00000005967, ENSBTAG00000004538	K->T	missense
chr1	45078689	A	C	NM_001101948, ZNF596	K->T	missense
chr1	45091055	G	A	ENSBTAT00000064904, ENSBTAG00000047076	M->I	missense
chr1	45091121	A	C	ENSBTAT00000064904, ENSBTAG00000047076	R->R	synonymous
chr1	45091221	C	G	ENSBTAT00000064904, ENSBTAG00000047076	R->G	missense
chr1	45366519	C	T	ENSBTAT00000005845, ENSBTAG00000004459	N->N	synonymous
chr1	45366519	C	T	NM_001075405, TMEM45A	N->N	synonymous
chr1	45366552	C	T	ENSBTAT00000005845, ENSBTAG00000004459	F->F	synonymous
chr1	45366552	C	T	NM_001075405, TMEM45A	F->F	synonymous
chr1	45370084	G	A	ENSBTAT00000005845, ENSBTAG00000004459	V->V	synonymous
chr1	45370084	G	A	NM_001075405, TMEM45A	V->V	synonymous
chr1	45415345	C	G	ENSBTAT00000016106, ENSBTAG00000012140	G->G	synonymous
chr1	45415345	C	G	NM_001083702, GPR128	G->G	synonymous
chr1	45415388	G	A	ENSBTAT00000016106, ENSBTAG00000012140	V->M	missense
chr1	45415388	G	A	NM_001083702, GPR128	V->M	missense
chr1	45436747	G	C	ENSBTAT00000016106, ENSBTAG00000012140	E->Q	missense
chr1	45436747	G	C	NM_001083702, GPR128	E->Q	missense
chr1	45440446	A	G	ENSBTAT00000016106, ENSBTAG00000012140	S->G	missense
chr1	45440446	A	G	NM_001083702, GPR128	S->G	missense
chr1	45445032	A	G	ENSBTAT00000016106, ENSBTAG00000012140	T->A	missense
chr1	45445032	A	G	NM_001083702, GPR128	T->A	missense
chr1	45449708	A	G	ENSBTAT00000016106, ENSBTAG00000012140	V->V	synonymous
chr1	45449708	A	G	NM_001083702, GPR128	V->V	synonymous
chr1	45449863	G	A	ENSBTAT00000016106, ENSBTAG00000012140	R->H	missense
chr1	45449863	G	A	NM_001083702, GPR128	R->H	missense
chr1	45462572	G	A	ENSBTAT00000016106, ENSBTAG00000012140	L->L	synonymous
chr1	45462572	G	A	NM_001083702, GPR128	L->L	synonymous
chr1	45462676	G	A	ENSBTAT00000016106, ENSBTAG00000012140	S->N	missense
chr1	45462676	G	A	NM_001083702, GPR128	S->N	missense
chr1	45468131	C	T	ENSBTAT00000016106, ENSBTAG00000012140	V->V	synonymous
chr1	45468131	C	T	NM_001083702, GPR128	V->V	synonymous
chr1	45468140	G	A	ENSBTAT00000016106, ENSBTAG00000012140	L->L	synonymous
chr1	45468140	G	A	NM_001083702, GPR128	L->L	synonymous
chr1	45470319	A	C	ENSBTAT00000016106, ENSBTAG00000012140	L->F	missense
chr1	45470319	A	C	NM_001083702, GPR128	L->F	missense
chr1	45503046	A	G	ENSBTAT00000004503, ENSBTAG00000016363	Q->Q	synonymous
chr1	45503046	A	G	NM_001192976, TFG	Q->Q	synonymous
chr1	45507180	G	A	NM_001192976, TFG	R->H	missense
chr1	45507180	G	A	ENSBTAT00000004503, ENSBTAG00000016363	A->A	synonymous
chr1	45520599	C	T	ENSBTAT00000004503, ENSBTAG00000016363	F->F	synonymous
chr1	45520599	C	T	NM_001192976, TFG	F->F	synonymous
chr1	45558093	C	T	ENSBTAT00000021766, ENSBTAG00000048157	V->V	synonymous
chr1	45558144	A	G	ENSBTAT00000021766, ENSBTAG00000048157	N->N	synonymous
chr1	45566915	T	C	ENSBTAT00000021766, ENSBTAG00000048157	E->E	synonymous
chr1	45572444	A	T	ENSBTAT00000021766, ENSBTAG00000048157	G->G	synonymous
chr1	45596407	T	C	ENSBTAT00000021766, ENSBTAG00000048157	E->G	missense
chr1	45596421	G	C	ENSBTAT00000021766, ENSBTAG00000048157	D->E	missense
chr1	45600688	G	A	ENSBTAT00000021766, ENSBTAG00000048157	P->P	synonymous
chr1	45613724	C	T	ENSBTAT00000021766, ENSBTAG00000048157	A->T	missense
chr1	45615061	G	A	ENSBTAT00000021766, ENSBTAG00000048157	T->T	synonymous
chr1	45619644	A	C	ENSBTAT00000021766, ENSBTAG00000048157	A->A	synonymous
chr1	45620361	C	T	ENSBTAT00000021766, ENSBTAG00000048157	V->I	missense
chr1	45633462	T	A	ENSBTAT00000021766, ENSBTAG00000048157	E->V	missense
chr1	45636985	T	C	ENSBTAT00000021766, ENSBTAG00000048157	K->E	missense
chr1	45637060	T	C	ENSBTAT00000021766, ENSBTAG00000048157	T->A	missense
chr1	45639267	G	C	ENSBTAT00000021766, ENSBTAG00000048157	T->S	missense
chr1	45640316	T	C	ENSBTAT00000021766, ENSBTAG00000048157	L->L	synonymous
chr1	45668461	T	C	ENSBTAT00000057490, ENSBTAG00000026836	I->V	missense
chr1	45676970	A	G	ENSBTAT00000057490, ENSBTAG00000026836	I->I	synonymous
chr1	45687560	G	A	ENSBTAT00000057490, ENSBTAG00000026836	Y->Y	synonymous
chr1	46091270	G	C	ENSBTAT00000020801, ENSBTAG00000015662	L->L	synonymous
chr1	46102678	A	G	ENSBTAT00000020801, ENSBTAG00000015662	S->S	synonymous
chr1	46103547	A	C	ENSBTAT00000020801, ENSBTAG00000015662	S->A	missense
chr1	46104533	A	G	ENSBTAT00000020801, ENSBTAG00000015662	V->A	missense
chr1	46128315	C	T	ENSBTAT00000020801, ENSBTAG00000015662	D->N	missense
chr1	46154658	C	G	ENSBTAT00000020801, ENSBTAG00000015662	E->Q	missense
chr1	46160716	T	C	ENSBTAT00000020801, ENSBTAG00000015662	K->R	missense
chr1	46175198	T	C	ENSBTAT00000022522, ENSBTAG00000016932	H->R	missense
chr1	46175198	T	C	NM_001101888, SENP7	H->R	missense
chr1	46196373	A	G	ENSBTAT00000022522, ENSBTAG00000016932	D->D	synonymous
chr1	46196373	A	G	NM_001101888, SENP7	D->D	synonymous
chr1	46197951	T	A	ENSBTAT00000022522, ENSBTAG00000016932	T->T	synonymous
chr1	46197951	T	A	NM_001101888, SENP7	T->T	synonymous
chr1	46201803	G	T	ENSBTAT00000022522, ENSBTAG00000016932	F->L	missense
chr1	46201803	G	T	NM_001101888, SENP7	F->L	missense
chr1	46212364	T	G	ENSBTAT00000022522, ENSBTAG00000016932	E->A	missense
chr1	46212364	T	G	NM_001101888, SENP7	E->A	missense
chr1	46215277	C	A	ENSBTAT00000022522, ENSBTAG00000016932	Q->H	missense
chr1	46215277	C	A	NM_001101888, SENP7	Q->H	missense
chr1	46217357	C	T	ENSBTAT00000022522, ENSBTAG00000016932	G->E	missense
chr1	46217357	C	T	NM_001101888, SENP7	G->E	missense
chr1	46253036	C	A	ENSBTAT00000022522, ENSBTAG00000016932	T->T	synonymous
chr1	46253036	C	A	NM_001101888, SENP7	T->T	synonymous
chr1	46290125	C	T	ENSBTAT00000022522, ENSBTAG00000016932	S->N	missense
chr1	46290125	C	T	NM_001101888, SENP7	S->N	missense
chr1	46290187	C	T	ENSBTAT00000022522, ENSBTAG00000016932	T->T	synonymous
chr1	46290187	C	T	NM_001101888, SENP7	T->T	synonymous
chr1	46323016	A	G	ENSBTAT00000054699, ENSBTAG00000018731	H->R	missense
chr1	46323047	T	C	ENSBTAT00000054699, ENSBTAG00000018731	H->H	synonymous
chr1	46323197	G	T	ENSBTAT00000054699, ENSBTAG00000018731	Q->H	missense
chr1	46323250	A	G	ENSBTAT00000054699, ENSBTAG00000018731	K->R	missense
chr1	46323609	G	A	ENSBTAT00000054699, ENSBTAG00000018731	V->I	missense
chr1	46339510	G	C	ENSBTAT00000033093, ENSBTAG00000024027	S->R	missense
chr1	46339510	G	C	NM_001046323, TRMT10C	S->R	missense
chr1	46340367	C	G	ENSBTAT00000033093, ENSBTAG00000024027	A->P	missense
chr1	46340367	C	G	NM_001046323, TRMT10C	A->P	missense
chr1	46340389	G	A	ENSBTAT00000033093, ENSBTAG00000024027	S->S	synonymous
chr1	46340389	G	A	NM_001046323, TRMT10C	S->S	synonymous
chr1	46382885	G	A	ENSBTAT00000017903, ENSBTAG00000013460	L->F	missense
chr1	46382885	G	A	NM_001205556, ZBTB11	L->F	missense
chr1	46387537	C	T	ENSBTAT00000017903, ENSBTAG00000013460	K->K	synonymous
chr1	46387537	C	T	NM_001205556, ZBTB11	K->K	synonymous
chr1	46392858	G	A	ENSBTAT00000017903, ENSBTAG00000013460	T->I	missense
chr1	46392858	G	A	NM_001205556, ZBTB11	T->I	missense
chr1	46393008	A	G	ENSBTAT00000017903, ENSBTAG00000013460	L->P	missense
chr1	46393008	A	G	NM_001205556, ZBTB11	L->P	missense
chr1	46400829	C	T	ENSBTAT00000017903, ENSBTAG00000013460	R->R	synonymous
chr1	46400829	C	T	NM_001205556, ZBTB11	R->R	synonymous
chr1	46411769	G	A	ENSBTAT00000017903, ENSBTAG00000013460	H->H	synonymous
chr1	46411769	G	A	NM_001205556, ZBTB11	H->H	synonymous
chr1	46411802	G	T	ENSBTAT00000017903, ENSBTAG00000013460	G->G	synonymous
chr1	46411802	G	T	NM_001205556, ZBTB11	G->G	synonymous
chr1	46411996	C	G	ENSBTAT00000017903, ENSBTAG00000013460	E->Q	missense
chr1	46411996	C	G	NM_001205556, ZBTB11	E->Q	missense
chr1	46445260	C	A	ENSBTAT00000017907, ENSBTAG00000013464	P->Q	missense
chr1	46445260	C	A	NM_001192424, CEP97	P->Q	missense
chr1	46451090	A	C	ENSBTAT00000017907, ENSBTAG00000013464	K->N	missense
chr1	46451090	A	C	NM_001192424, CEP97	K->N	missense
chr1	46451529	G	A	ENSBTAT00000017907, ENSBTAG00000013464	V->I	missense
chr1	46451529	G	A	NM_001192424, CEP97	V->I	missense
chr1	46451543	C	T	ENSBTAT00000017907, ENSBTAG00000013464	S->S	synonymous
chr1	46451543	C	T	NM_001192424, CEP97	S->S	synonymous
chr1	46498130	A	G	ENSBTAT00000017908, ENSBTAG00000013465	K->R	missense
chr1	46498130	A	G	NM_001081529, NXPE3	K->R	missense
chr1	46543504	T	C	ENSBTAT00000014591, ENSBTAG00000010987	I->I	synonymous
chr1	46543504	T	C	ENSBTAT00000047710, ENSBTAG00000010987	I->I	synonymous
chr1	46543504	T	C	NM_174726, NFKBIZ	I->I	synonymous
chr1	46546949	C	T	ENSBTAT00000014591, ENSBTAG00000010987	P->S	missense
chr1	46546949	C	T	ENSBTAT00000047710, ENSBTAG00000010987	P->S	missense
chr1	46546949	C	T	NM_174726, NFKBIZ	P->S	missense
chr1	46546952	G	T	ENSBTAT00000014591, ENSBTAG00000010987	A->S	missense
chr1	46546952	G	T	ENSBTAT00000047710, ENSBTAG00000010987	A->S	missense
chr1	46546952	G	T	NM_174726, NFKBIZ	A->S	missense
chr1	46548587	G	A	ENSBTAT00000014591, ENSBTAG00000010987	A->A	synonymous
chr1	46548587	G	A	ENSBTAT00000047710, ENSBTAG00000010987	A->A	synonymous
chr1	46548587	G	A	NM_174726, NFKBIZ	A->A	synonymous
chr1	46549128	G	C	ENSBTAT00000014591, ENSBTAG00000010987	V->V	synonymous
chr1	46549128	G	C	ENSBTAT00000047710, ENSBTAG00000010987	V->V	synonymous
chr1	46549128	G	C	NM_174726, NFKBIZ	V->V	synonymous
chr1	46549761	G	A	ENSBTAT00000014591, ENSBTAG00000010987	V->I	missense
chr1	46549761	G	A	ENSBTAT00000047710, ENSBTAG00000010987	V->I	missense
chr1	46549761	G	A	NM_174726, NFKBIZ	V->I	missense
chr1	47006834	C	T	ENSBTAT00000025650, ENSBTAG00000024806	G->G	synonymous
chr1	47006973	A	T	ENSBTAT00000025650, ENSBTAG00000024806	K->*	stop-gain
chr1	47062638	G	A	ENSBTAT00000065922, ENSBTAG00000047093	L->L	synonymous
chr1	47062806	G	C	ENSBTAT00000065922, ENSBTAG00000047093	L->V	missense
chr1	47063114	G	A	ENSBTAT00000065922, ENSBTAG00000047093	A->V	missense
chr1	47063147	A	G	ENSBTAT00000065922, ENSBTAG00000047093	L->S	missense
chr1	47063223	G	T	ENSBTAT00000065922, ENSBTAG00000047093	P->T	missense
chr1	47063740	C	T	ENSBTAT00000065922, ENSBTAG00000047093	R->H	missense
chr1	47277748	C	T	ENSBTAT00000004776, ENSBTAG00000003666	S->S	synonymous
chr1	47290023	C	A	ENSBTAT00000004776, ENSBTAG00000003666	Q->K	missense
chr1	47291516	G	A	ENSBTAT00000004776, ENSBTAG00000003666	R->Q	missense
chr1	50503111	G	A	ENSBTAT00000000097, ENSBTAG00000000088	S->S	synonymous
chr1	50503111	G	A	NM_174238, ALCAM	S->S	synonymous
chr1	50504868	A	G	ENSBTAT00000000097, ENSBTAG00000000088	N->D	missense
chr1	50504868	A	G	NM_174238, ALCAM	N->D	missense
chr1	50504914	G	A	ENSBTAT00000000097, ENSBTAG00000000088	G->E	missense
chr1	50504914	G	A	NM_174238, ALCAM	G->E	missense
chr1	50531458	T	C	ENSBTAT00000000097, ENSBTAG00000000088	S->S	synonymous
chr1	50531458	T	C	NM_174238, ALCAM	S->S	synonymous
chr1	50534503	C	A	ENSBTAT00000000097, ENSBTAG00000000088	A->D	missense
chr1	50534503	C	A	NM_174238, ALCAM	A->D	missense
chr1	50682457	G	A	ENSBTAT00000017358, ENSBTAG00000013057	N->N	synonymous
chr1	50682457	G	A	ENSBTAT00000062945, ENSBTAG00000013057	N->N	synonymous
chr1	50682457	G	A	NM_001205923, CBLB	N->N	synonymous
chr1	50732049	A	G	ENSBTAT00000017358, ENSBTAG00000013057	D->D	synonymous
chr1	50732049	A	G	ENSBTAT00000062945, ENSBTAG00000013057	D->D	synonymous
chr1	50732049	A	G	NM_001205923, CBLB	D->D	synonymous
chr1	50880047	A	G	ENSBTAT00000017358, ENSBTAG00000013057	I->I	synonymous
chr1	50880047	A	G	NM_001205923, CBLB	I->I	synonymous
chr1	52364059	A	G	ENSBTAT00000063186, ENSBTAG00000046313	E->E	synonymous
chr1	52364059	A	G	NM_001105490, CCDC54	E->E	synonymous
chr1	53116710	T	C	ENSBTAT00000004664, ENSBTAG00000003585	I->V	missense
chr1	53116710	T	C	ENSBTAT00000055450, ENSBTAG00000003585	I->V	missense
chr1	53116710	T	C	NM_174708, CD47	I->V	missense
chr1	53363929	T	C	ENSBTAT00000007606, ENSBTAG00000005787	V->V	synonymous
chr1	53363929	T	C	NM_001105403, IFT57	V->V	synonymous
chr1	53368660	T	C	ENSBTAT00000007606, ENSBTAG00000005787	N->D	missense
chr1	53368660	T	C	NM_001105403, IFT57	N->D	missense
chr1	53368760	C	G	ENSBTAT00000007606, ENSBTAG00000005787	A->A	synonymous
chr1	53368760	C	G	NM_001105403, IFT57	A->A	synonymous
chr1	53512374	G	A	ENSBTAT00000024479, ENSBTAG00000018397	W->*	stop-gain
chr1	53512448	T	A	ENSBTAT00000024479, ENSBTAG00000018397	V->E	missense
chr1	53512540	G	A	ENSBTAT00000024479, ENSBTAG00000018397	V->I	missense
chr1	53520607	T	C	ENSBTAT00000024479, ENSBTAG00000018397	N->N	synonymous
chr1	53520749	C	G	ENSBTAT00000024479, ENSBTAG00000018397	L->V	missense
chr1	53520943	G	A	ENSBTAT00000024479, ENSBTAG00000018397	A->T	missense
chr1	53530605	T	C	ENSBTAT00000032372, ENSBTAG00000018399	A->A	synonymous
chr1	53538525	G	T	ENSBTAT00000032372, ENSBTAG00000018399	L->I	missense
chr1	53547550	A	G	ENSBTAT00000032372, ENSBTAG00000018399	S->S	synonymous
chr1	53548110	G	A	ENSBTAT00000032372, ENSBTAG00000018399	S->L	missense
chr1	53548131	C	T	ENSBTAT00000032372, ENSBTAG00000018399	C->Y	missense
chr1	53560330	C	T	ENSBTAT00000032372, ENSBTAG00000018399	Q->Q	synonymous
chr1	53579772	C	T	ENSBTAT00000032372, ENSBTAG00000018399	R->Q	missense
chr1	53579789	C	T	ENSBTAT00000032372, ENSBTAG00000018399	A->A	synonymous
chr1	53590190	A	G	ENSBTAT00000032372, ENSBTAG00000018399	M->T	missense
chr1	53590416	T	C	ENSBTAT00000032372, ENSBTAG00000018399	I->V	missense
chr1	53590488	G	A	ENSBTAT00000032372, ENSBTAG00000018399	L->F	missense
chr1	53596373	G	C	ENSBTAT00000032372, ENSBTAG00000018399	D->E	missense
chr1	53598190	C	T	ENSBTAT00000032372, ENSBTAG00000018399	T->T	synonymous
chr1	53598208	T	C	ENSBTAT00000032372, ENSBTAG00000018399	L->L	synonymous
chr1	53598336	G	T	ENSBTAT00000032372, ENSBTAG00000018399	L->M	missense
chr1	53599542	C	T	ENSBTAT00000032372, ENSBTAG00000018399	A->A	synonymous
chr1	53599550	C	T	ENSBTAT00000032372, ENSBTAG00000018399	V->I	missense
chr1	53610493	C	T	ENSBTAT00000032372, ENSBTAG00000018399	L->L	synonymous
chr1	53612697	C	A	ENSBTAT00000032372, ENSBTAG00000018399	G->V	missense
chr1	53629689	T	C	ENSBTAT00000032372, ENSBTAG00000018399	Q->Q	synonymous
chr1	53636458	T	C	ENSBTAT00000032372, ENSBTAG00000018399	I->V	missense
chr1	53636475	C	T	ENSBTAT00000032372, ENSBTAG00000018399	G->D	missense
chr1	53654820	C	T	ENSBTAT00000032372, ENSBTAG00000018399	S->N	missense
chr1	53687467	A	G	ENSBTAT00000032372, ENSBTAG00000018399	A->A	synonymous
chr1	53753687	C	T	ENSBTAT00000022784, ENSBTAG00000017140	Q->Q	synonymous
chr1	53753687	C	T	NM_001103284, KIAA1524	Q->Q	synonymous
chr1	53768386	T	C	ENSBTAT00000008099, ENSBTAG00000006158	S->S	synonymous
chr1	53768386	T	C	NM_001076092, DZIP3	S->S	synonymous
chr1	53854090	G	A	ENSBTAT00000008099, ENSBTAG00000006158	C->Y	missense
chr1	53854090	G	A	NM_001076092, DZIP3	C->Y	missense
chr1	53855896	A	G	ENSBTAT00000008099, ENSBTAG00000006158	E->G	missense
chr1	53855896	A	G	NM_001076092, DZIP3	E->G	missense
chr1	53856167	C	G	ENSBTAT00000008099, ENSBTAG00000006158	I->M	missense
chr1	53856167	C	G	NM_001076092, DZIP3	I->M	missense
chr1	54023030	C	T	ENSBTAT00000034536, ENSBTAG00000000183	S->S	synonymous
chr1	54023030	C	T	NM_001163943, TRAT1	S->S	synonymous
chr1	54032498	C	T	ENSBTAT00000034536, ENSBTAG00000000183	A->V	missense
chr1	54032498	C	T	NM_001163943, TRAT1	A->V	missense
chr1	54034661	T	C	ENSBTAT00000034536, ENSBTAG00000000183	V->A	missense
chr1	54034661	T	C	NM_001163943, TRAT1	V->A	missense
chr1	54041195	G	A	ENSBTAT00000034536, ENSBTAG00000000183	R->R	synonymous
chr1	54041195	G	A	NM_001163943, TRAT1	R->R	synonymous
chr1	54041205	A	T	ENSBTAT00000034536, ENSBTAG00000000183	T->S	missense
chr1	54041205	A	T	NM_001163943, TRAT1	T->S	missense
chr1	54041300	C	A	ENSBTAT00000034536, ENSBTAG00000000183	S->R	missense
chr1	54041300	C	A	NM_001163943, TRAT1	S->R	missense
chr1	54041300	C	T	ENSBTAT00000034536, ENSBTAG00000000183	S->S	synonymous
chr1	54041300	C	T	NM_001163943, TRAT1	S->S	synonymous
chr1	54041404	G	A	ENSBTAT00000034536, ENSBTAG00000000183	*->*	synonymous
chr1	54041404	G	A	NM_001163943, TRAT1	*->*	synonymous
chr1	54143297	A	C	ENSBTAT00000052196, ENSBTAG00000015475	L->R	missense
chr1	54143299	C	T	ENSBTAT00000052196, ENSBTAG00000015475	Q->Q	synonymous
chr1	54143398	A	G	ENSBTAT00000052196, ENSBTAG00000015475	N->N	synonymous
chr1	54143404	T	C	ENSBTAT00000052196, ENSBTAG00000015475	V->V	synonymous
chr1	54152340	T	C	ENSBTAT00000052196, ENSBTAG00000015475	E->E	synonymous
chr1	54153852	A	T	ENSBTAT00000052196, ENSBTAG00000015475	L->L	synonymous
chr1	54153870	C	T	ENSBTAT00000052196, ENSBTAG00000015475	Q->Q	synonymous
chr1	54185575	A	G	ENSBTAT00000052196, ENSBTAG00000015475	I->T	missense
chr1	54190912	C	A	ENSBTAT00000052196, ENSBTAG00000015475	W->L	missense
chr1	54206653	T	C	ENSBTAT00000052196, ENSBTAG00000015475	Q->Q	synonymous
chr1	54279080	G	A	ENSBTAT00000052196, ENSBTAG00000015475	Y->Y	synonymous
chr1	54296928	A	G	ENSBTAT00000052196, ENSBTAG00000015475	L->L	synonymous
chr1	54481566	A	G	ENSBTAT00000027264, ENSBTAG00000020460	C->R	missense
chr1	54481566	A	G	ENSBTAT00000057339, ENSBTAG00000020460	C->R	missense
chr1	54481566	A	G	NM_001206470, DPPA2	C->R	missense
chr1	54481582	T	C	ENSBTAT00000027264, ENSBTAG00000020460	L->L	synonymous
chr1	54481582	T	C	ENSBTAT00000057339, ENSBTAG00000020460	L->L	synonymous
chr1	54481582	T	C	NM_001206470, DPPA2	L->L	synonymous
chr1	54484260	G	A	ENSBTAT00000027264, ENSBTAG00000020460	D->D	synonymous
chr1	54484260	G	A	ENSBTAT00000057339, ENSBTAG00000020460	D->D	synonymous
chr1	54484260	G	A	NM_001206470, DPPA2	D->D	synonymous
chr1	54487469	G	T	ENSBTAT00000027264, ENSBTAG00000020460	S->Y	missense
chr1	54487469	G	T	ENSBTAT00000057339, ENSBTAG00000020460	S->Y	missense
chr1	54487469	G	T	NM_001206470, DPPA2	S->Y	missense
chr1	54489770	G	T	ENSBTAT00000057339, ENSBTAG00000020460	S->*	stop-gain
chr1	54489818	T	C	ENSBTAT00000057339, ENSBTAG00000020460	Q->R	missense
chr1	54490090	G	A	ENSBTAT00000027264, ENSBTAG00000020460	S->S	synonymous
chr1	54490090	G	A	NM_001206470, DPPA2	S->S	synonymous
chr1	54490823	C	T	ENSBTAT00000027264, ENSBTAG00000020460	-	splice-site
chr1	54511342	T	C	ENSBTAT00000052895, ENSBTAG00000038103	V->V	synonymous
chr1	54511342	T	C	ENSBTAT00000055391, ENSBTAG00000038103	V->V	synonymous
chr1	54511342	T	C	ENSBTAT00000056336, ENSBTAG00000038103	V->V	synonymous
chr1	54511342	T	C	NM_001206481, DPPA4	V->V	synonymous
chr1	54514541	C	T	ENSBTAT00000052895, ENSBTAG00000038103	S->S	synonymous
chr1	54514541	C	T	ENSBTAT00000055391, ENSBTAG00000038103	S->S	synonymous
chr1	54514541	C	T	ENSBTAT00000056336, ENSBTAG00000038103	S->S	synonymous
chr1	54514541	C	T	NM_001206481, DPPA4	S->S	synonymous
chr1	54514670	C	G	ENSBTAT00000052895, ENSBTAG00000038103	P->P	synonymous
chr1	54514670	C	G	ENSBTAT00000055391, ENSBTAG00000038103	P->P	synonymous
chr1	54514670	C	G	ENSBTAT00000056336, ENSBTAG00000038103	P->P	synonymous
chr1	54514670	C	G	NM_001206481, DPPA4	P->P	synonymous
chr1	54514677	C	G	ENSBTAT00000052895, ENSBTAG00000038103	R->P	missense
chr1	54514677	C	G	ENSBTAT00000055391, ENSBTAG00000038103	R->P	missense
chr1	54514677	C	G	ENSBTAT00000056336, ENSBTAG00000038103	R->P	missense
chr1	54514677	C	G	NM_001206481, DPPA4	R->P	missense
chr1	54514763	G	C	ENSBTAT00000052895, ENSBTAG00000038103	S->S	synonymous
chr1	54514763	G	C	ENSBTAT00000055391, ENSBTAG00000038103	S->S	synonymous
chr1	54514763	G	C	ENSBTAT00000056336, ENSBTAG00000038103	S->S	synonymous
chr1	54514763	G	C	NM_001206481, DPPA4	S->S	synonymous
chr1	54515140	T	C	ENSBTAT00000052895, ENSBTAG00000038103	L->L	synonymous
chr1	54515140	T	C	ENSBTAT00000055391, ENSBTAG00000038103	L->L	synonymous
chr1	54515140	T	C	ENSBTAT00000056336, ENSBTAG00000038103	L->L	synonymous
chr1	54515140	T	C	NM_001206481, DPPA4	L->L	synonymous
chr1	54515229	C	G	ENSBTAT00000052895, ENSBTAG00000038103	G->R	missense
chr1	54515229	C	G	ENSBTAT00000056336, ENSBTAG00000038103	G->R	missense
chr1	54515229	C	G	NM_001206481, DPPA4	G->R	missense
chr1	54516334	G	A	ENSBTAT00000052895, ENSBTAG00000038103	N->N	synonymous
chr1	54516334	G	A	ENSBTAT00000056336, ENSBTAG00000038103	N->N	synonymous
chr1	54516334	G	A	NM_001206481, DPPA4	N->N	synonymous
chr1	54516361	T	C	ENSBTAT00000052895, ENSBTAG00000038103	G->G	synonymous
chr1	54516361	T	C	ENSBTAT00000056336, ENSBTAG00000038103	G->G	synonymous
chr1	54516361	T	C	NM_001206481, DPPA4	G->G	synonymous
chr1	54516476	T	C	ENSBTAT00000056336, ENSBTAG00000038103	N->S	missense
chr1	54516476	T	C	NM_001206481, DPPA4	N->S	missense
chr1	54516555	C	G	ENSBTAT00000056336, ENSBTAG00000038103	R->P	missense
chr1	54649772	G	A	ENSBTAT00000020266, ENSBTAG00000022275	P->L	missense
chr1	54649859	C	A	ENSBTAT00000020266, ENSBTAG00000022275	S->I	missense
chr1	54650204	G	C	ENSBTAT00000020266, ENSBTAG00000022275	P->R	missense
chr1	54650236	A	G	ENSBTAT00000020266, ENSBTAG00000022275	P->P	synonymous
chr1	54650247	C	T	ENSBTAT00000020266, ENSBTAG00000022275	G->S	missense
chr1	55802262	A	C	ENSBTAT00000066238, ENSBTAG00000045855	Y->D	missense
chr1	56028500	T	G	ENSBTAT00000065920, ENSBTAG00000045820	L->F	missense
chr1	56028558	C	T	ENSBTAT00000065920, ENSBTAG00000045820	S->N	missense
chr1	56165086	G	A	ENSBTAT00000056200, ENSBTAG00000038651	S->L	missense
chr1	56165248	C	T	ENSBTAT00000056200, ENSBTAG00000038651	R->Q	missense
chr1	56165802	C	T	ENSBTAT00000056200, ENSBTAG00000038651	G->D	missense
chr1	56165861	T	C	ENSBTAT00000056200, ENSBTAG00000038651	V->V	synonymous
chr1	56165867	A	C	ENSBTAT00000056200, ENSBTAG00000038651	N->K	missense
chr1	56360886	G	A	ENSBTAT00000032332, ENSBTAG00000013769	V->I	missense
chr1	56378105	C	T	ENSBTAT00000032332, ENSBTAG00000013769	R->C	missense
chr1	56378233	G	A	ENSBTAT00000032332, ENSBTAG00000013769	Q->Q	synonymous
chr1	56724630	C	T	ENSBTAT00000019209, ENSBTAG00000014441	A->V->V	missense:MNP
chr1	56724630	C	T	NM_001035072, CD96	A->V->V	missense:MNP
chr1	56724631	A	G	ENSBTAT00000019209, ENSBTAG00000014441	A->A	synonymous
chr1	56724631	A	G	NM_001035072, CD96	A->A	synonymous
chr1	56724792	G	C	ENSBTAT00000019209, ENSBTAG00000014441	S->T	missense
chr1	56724792	G	C	NM_001035072, CD96	S->T	missense
chr1	56736565	G	A	ENSBTAT00000019209, ENSBTAG00000014441	E->E	synonymous
chr1	56736565	G	A	NM_001035072, CD96	E->E	synonymous
chr1	56759677	G	A	ENSBTAT00000063209, ENSBTAG00000046637	G->G	synonymous
chr1	56759869	C	G	ENSBTAT00000063209, ENSBTAG00000046637	G->G	synonymous
chr1	56759893	A	G	ENSBTAT00000063209, ENSBTAG00000046637	D->D	synonymous
chr1	56766766	T	C	ENSBTAT00000019209, ENSBTAG00000014441	V->A	missense
chr1	56766766	T	C	NM_001035072, CD96	V->A	missense
chr1	56801016	C	T	ENSBTAT00000019209, ENSBTAG00000014441	P->L	missense
chr1	56801016	C	T	NM_001035072, CD96	P->L	missense
chr1	56801613	C	T	ENSBTAT00000019209, ENSBTAG00000014441	D->D	synonymous
chr1	56801613	C	T	NM_001035072, CD96	D->D	synonymous
chr1	56812508	G	A	ENSBTAT00000019209, ENSBTAG00000014441	T->T	synonymous
chr1	56812508	G	A	NM_001035072, CD96	T->T	synonymous
chr1	56816605	C	T	ENSBTAT00000019209, ENSBTAG00000014441	L->L	synonymous
chr1	56816605	C	T	NM_001035072, CD96	L->L	synonymous
chr1	56816618	G	A	ENSBTAT00000019209, ENSBTAG00000014441	V->I	missense
chr1	56816618	G	A	NM_001035072, CD96	V->I	missense
chr1	56844529	A	G	ENSBTAT00000016779, ENSBTAG00000012646	K->K	synonymous
chr1	56844568	T	C	ENSBTAT00000016779, ENSBTAG00000012646	L->L	synonymous
chr1	56878604	C	G	ENSBTAT00000016779, ENSBTAG00000012646	S->S	synonymous
chr1	56878745	C	T	ENSBTAT00000016779, ENSBTAG00000012646	H->H	synonymous
chr1	56878948	A	G	ENSBTAT00000016779, ENSBTAG00000012646	Q->R	missense
chr1	56878969	A	G	ENSBTAT00000016779, ENSBTAG00000012646	Y->C	missense
chr1	56894431	C	T	ENSBTAT00000016779, ENSBTAG00000012646	L->L	synonymous
chr1	56894465	C	T	ENSBTAT00000016779, ENSBTAG00000012646	A->V	missense
chr1	57055801	G	A	ENSBTAT00000001599, ENSBTAG00000001209	S->N	missense
chr1	57055801	G	A	NM_001206308, PHLDB2	S->N	missense
chr1	57055845	G	C	ENSBTAT00000001599, ENSBTAG00000001209	A->P	missense
chr1	57055845	G	C	NM_001206308, PHLDB2	A->P	missense
chr1	57078433	C	T	ENSBTAT00000001599, ENSBTAG00000001209	S->S	synonymous
chr1	57078433	C	T	NM_001206308, PHLDB2	S->S	synonymous
chr1	57109151	A	G	ENSBTAT00000001599, ENSBTAG00000001209	H->R	missense
chr1	57109151	A	G	NM_001206308, PHLDB2	H->R	missense
chr1	57140521	G	A	ENSBTAT00000001599, ENSBTAG00000001209	T->T	synonymous
chr1	57140521	G	A	NM_001206308, PHLDB2	T->T	synonymous
chr1	57145517	T	C	ENSBTAT00000001599, ENSBTAG00000001209	V->V	synonymous
chr1	57145517	T	C	NM_001206308, PHLDB2	V->V	synonymous
chr1	57145520	C	A	ENSBTAT00000001599, ENSBTAG00000001209	I->I	synonymous
chr1	57145520	C	A	NM_001206308, PHLDB2	I->I	synonymous
chr1	57156379	C	T	ENSBTAT00000006038, ENSBTAG00000004601	P->S	missense
chr1	57156379	C	T	NM_001015606, ABHD10	P->S	missense
chr1	57168731	T	C	ENSBTAT00000006038, ENSBTAG00000004601	V->V	synonymous
chr1	57168731	T	C	NM_001015606, ABHD10	V->V	synonymous
chr1	57168755	T	C	ENSBTAT00000006038, ENSBTAG00000004601	C->C	synonymous
chr1	57168755	T	C	NM_001015606, ABHD10	C->C	synonymous
chr1	57180085	A	G	ENSBTAT00000006033, ENSBTAG00000004599	S->S	synonymous
chr1	57180085	A	G	NM_001034499, TAGLN3	S->S	synonymous
chr1	57180115	A	G	ENSBTAT00000006033, ENSBTAG00000004599	E->E	synonymous
chr1	57180115	A	G	NM_001034499, TAGLN3	E->E	synonymous
chr1	57190572	A	G	ENSBTAT00000006033, ENSBTAG00000004599	A->A	synonymous
chr1	57190572	A	G	NM_001034499, TAGLN3	A->A	synonymous
chr1	57191999	C	T	ENSBTAT00000006033, ENSBTAG00000004599	S->S	synonymous
chr1	57191999	C	T	NM_001034499, TAGLN3	S->S	synonymous
chr1	57192095	C	T	ENSBTAT00000006033, ENSBTAG00000004599	P->P	synonymous
chr1	57192095	C	T	NM_001034499, TAGLN3	P->P	synonymous
chr1	57228030	A	C	ENSBTAT00000020053, ENSBTAG00000015065	R->R	synonymous
chr1	57228030	A	C	NM_001205892, TMPRSS7	R->R	synonymous
chr1	57232408	T	G	ENSBTAT00000020053, ENSBTAG00000015065	S->A	missense
chr1	57232408	T	G	NM_001205892, TMPRSS7	S->A	missense
chr1	57233712	C	G	ENSBTAT00000020053, ENSBTAG00000015065	V->V	synonymous
chr1	57233712	C	G	NM_001205892, TMPRSS7	V->V	synonymous
chr1	57236270	C	T	ENSBTAT00000020053, ENSBTAG00000015065	T->I	missense
chr1	57236270	C	T	NM_001205892, TMPRSS7	T->I	missense
chr1	57237933	T	C	ENSBTAT00000020053, ENSBTAG00000015065	W->R	missense
chr1	57237933	T	C	NM_001205892, TMPRSS7	W->R	missense
chr1	57248627	C	G	ENSBTAT00000020053, ENSBTAG00000015065	D->E	missense
chr1	57248627	C	G	NM_001205892, TMPRSS7	D->E	missense
chr1	57253115	C	T	ENSBTAT00000020053, ENSBTAG00000015065	I->I	synonymous
chr1	57253115	C	T	NM_001205892, TMPRSS7	I->I	synonymous
chr1	57255084	C	T	ENSBTAT00000020053, ENSBTAG00000015065	S->S	synonymous
chr1	57255084	C	T	NM_001205892, TMPRSS7	S->S	synonymous
chr1	57257637	C	T	ENSBTAT00000020053, ENSBTAG00000015065	F->F	synonymous
chr1	57257637	C	T	NM_001205892, TMPRSS7	F->F	synonymous
chr1	57257643	G	A	ENSBTAT00000020053, ENSBTAG00000015065	Q->Q	synonymous
chr1	57257643	G	A	NM_001205892, TMPRSS7	Q->Q	synonymous
chr1	57257664	C	T	ENSBTAT00000020053, ENSBTAG00000015065	D->D	synonymous
chr1	57257664	C	T	NM_001205892, TMPRSS7	D->D	synonymous
chr1	57257711	G	A	ENSBTAT00000020053, ENSBTAG00000015065	R->H	missense
chr1	57257711	G	A	NM_001205892, TMPRSS7	R->H	missense
chr1	57260111	T	C	ENSBTAT00000020053, ENSBTAG00000015065	F->S	missense
chr1	57260111	T	C	NM_001205892, TMPRSS7	F->S	missense
chr1	57264591	G	A	ENSBTAT00000020053, ENSBTAG00000015065	S->S	synonymous
chr1	57264591	G	A	NM_001205892, TMPRSS7	S->S	synonymous
chr1	57264624	G	A	ENSBTAT00000020053, ENSBTAG00000015065	K->K	synonymous
chr1	57264624	G	A	NM_001205892, TMPRSS7	K->K	synonymous
chr1	57268683	G	C	ENSBTAT00000020053, ENSBTAG00000015065	K->N	missense
chr1	57268683	G	C	NM_001205892, TMPRSS7	K->N	missense
chr1	57268810	C	G	ENSBTAT00000020053, ENSBTAG00000015065	L->V	missense
chr1	57268810	C	G	NM_001205892, TMPRSS7	L->V	missense
chr1	57279705	C	T	ENSBTAT00000022018, ENSBTAG00000016554	P->L	missense
chr1	57279738	C	T	ENSBTAT00000022018, ENSBTAG00000016554	S->L	missense
chr1	57312114	C	T	ENSBTAT00000022018, ENSBTAG00000016554	H->H	synonymous
chr1	57312114	C	T	ENSBTAT00000057589, ENSBTAG00000016554	H->H	synonymous
chr1	57314811	C	T	ENSBTAT00000022018, ENSBTAG00000016554	G->G	synonymous
chr1	57314811	C	T	ENSBTAT00000057589, ENSBTAG00000016554	G->G	synonymous
chr1	57314892	C	T	ENSBTAT00000022018, ENSBTAG00000016554	Y->Y	synonymous
chr1	57314892	C	T	ENSBTAT00000057589, ENSBTAG00000016554	Y->Y	synonymous
chr1	57314919	C	G	ENSBTAT00000057589, ENSBTAG00000016554	H->Q	missense
chr1	57327031	C	A	ENSBTAT00000022023, ENSBTAG00000016556	T->T	synonymous
chr1	57327031	C	A	NM_001191208, GCET2	T->T	synonymous
chr1	57327188	T	C	ENSBTAT00000022023, ENSBTAG00000016556	E->G	missense
chr1	57327188	T	C	NM_001191208, GCET2	E->G	missense
chr1	57334353	T	C	ENSBTAT00000022023, ENSBTAG00000016556	P->P	synonymous
chr1	57334353	T	C	NM_001191208, GCET2	P->P	synonymous
chr1	57334368	C	T	ENSBTAT00000022023, ENSBTAG00000016556	A->A	synonymous
chr1	57334368	C	T	NM_001191208, GCET2	A->A	synonymous
chr1	57363641	C	T	ENSBTAT00000061361, ENSBTAG00000019332	L->L	synonymous
chr1	57370531	A	G	ENSBTAT00000061361, ENSBTAG00000019332	Y->Y	synonymous
chr1	57372528	A	G	ENSBTAT00000061361, ENSBTAG00000019332	D->D	synonymous
chr1	57389670	T	G	ENSBTAT00000061361, ENSBTAG00000019332	L->L	synonymous
chr1	57398384	T	C	ENSBTAT00000061361, ENSBTAG00000019332	T->T	synonymous
chr1	57402292	G	T	ENSBTAT00000061361, ENSBTAG00000019332	I->I	synonymous
chr1	57402298	G	A	ENSBTAT00000061361, ENSBTAG00000019332	S->S	synonymous
chr1	57407016	T	C	ENSBTAT00000061361, ENSBTAG00000019332	I->V	missense
chr1	57421292	G	A	ENSBTAT00000061361, ENSBTAG00000019332	P->P	synonymous
chr1	57421316	G	A	ENSBTAT00000061361, ENSBTAG00000019332	V->V	synonymous
chr1	57423510	T	A	ENSBTAT00000061361, ENSBTAG00000019332	N->Y	missense
chr1	57438420	G	A	ENSBTAT00000061361, ENSBTAG00000019332	N->N	synonymous
chr1	57501848	A	G	ENSBTAT00000061361, ENSBTAG00000019332	N->N	synonymous
chr1	57583743	G	A	ENSBTAT00000027169, ENSBTAG00000033319	V->I	missense
chr1	57583743	G	A	NM_001034620, CD200	V->I	missense
chr1	57672646	C	T	ENSBTAT00000015755, ENSBTAG00000011871	T->T	synonymous
chr1	57672661	T	C	ENSBTAT00000015755, ENSBTAG00000011871	V->V	synonymous
chr1	57672765	C	T	ENSBTAT00000015755, ENSBTAG00000011871	G->R	missense
chr1	57788024	T	C	ENSBTAT00000011977, ENSBTAG00000009085	V->A	missense
chr1	57788024	T	C	NM_001076025, SLC35A5	V->A	missense
chr1	57788027	C	G	ENSBTAT00000011977, ENSBTAG00000009085	S->W	missense
chr1	57788027	C	G	NM_001076025, SLC35A5	S->W	missense
chr1	57803462	G	A	ENSBTAT00000011977, ENSBTAG00000009085	G->R	missense
chr1	57803462	G	A	NM_001076025, SLC35A5	G->R	missense
chr1	57803881	C	T	ENSBTAT00000011977, ENSBTAG00000009085	S->S	synonymous
chr1	57803881	C	T	NM_001076025, SLC35A5	S->S	synonymous
chr1	57804055	G	A	ENSBTAT00000011977, ENSBTAG00000009085	T->T	synonymous
chr1	57804055	G	A	NM_001076025, SLC35A5	T->T	synonymous
chr1	57804151	T	C	ENSBTAT00000011977, ENSBTAG00000009085	N->N	synonymous
chr1	57804151	T	C	NM_001076025, SLC35A5	N->N	synonymous
chr1	57820194	A	G	ENSBTAT00000014293, ENSBTAG00000010793	C->C	synonymous
chr1	57820194	A	G	NM_001098982, CCDC80	C->C	synonymous
chr1	57820392	A	G	ENSBTAT00000014293, ENSBTAG00000010793	A->A	synonymous
chr1	57820392	A	G	NM_001098982, CCDC80	A->A	synonymous
chr1	57821186	C	T	ENSBTAT00000014293, ENSBTAG00000010793	G->E	missense
chr1	57821186	C	T	NM_001098982, CCDC80	G->E	missense
chr1	57833404	G	C	ENSBTAT00000014293, ENSBTAG00000010793	V->V	synonymous
chr1	57833404	G	C	NM_001098982, CCDC80	V->V	synonymous
chr1	57853107	G	A	ENSBTAT00000014293, ENSBTAG00000010793	G->G	synonymous
chr1	57853107	G	A	NM_001098982, CCDC80	G->G	synonymous
chr1	57853226	T	A	ENSBTAT00000014293, ENSBTAG00000010793	R->W	missense
chr1	57853226	T	A	NM_001098982, CCDC80	R->W	missense
chr1	57853690	C	T	ENSBTAT00000014293, ENSBTAG00000010793	R->K	missense
chr1	57853690	C	T	NM_001098982, CCDC80	R->K	missense
chr1	57854094	C	A	ENSBTAT00000014293, ENSBTAG00000010793	P->P	synonymous
chr1	57854094	C	A	NM_001098982, CCDC80	P->P	synonymous
chr1	57854363	C	G	ENSBTAT00000014293, ENSBTAG00000010793	V->L	missense
chr1	57854363	C	G	NM_001098982, CCDC80	V->L	missense
chr1	58015565	C	G	ENSBTAT00000056936, ENSBTAG00000040144	*->S	stop-loss
chr1	58015624	G	A	ENSBTAT00000056936, ENSBTAG00000040144	N->N	synonymous
chr1	58028289	C	T	ENSBTAT00000056936, ENSBTAG00000040144	G->S	missense
chr1	58028329	C	T	ENSBTAT00000056936, ENSBTAG00000040144	E->E	synonymous
chr1	58028365	T	C	ENSBTAT00000056936, ENSBTAG00000040144	A->A	synonymous
chr1	58028583	C	T	ENSBTAT00000056936, ENSBTAG00000040144	S->N	missense
chr1	58028590	T	C	ENSBTAT00000056936, ENSBTAG00000040144	I->V	missense
chr1	58028607	T	A	ENSBTAT00000056936, ENSBTAG00000040144	N->I	missense
chr1	58028690	G	A	ENSBTAT00000056936, ENSBTAG00000040144	T->T	synonymous
chr1	58028747	T	C	ENSBTAT00000056936, ENSBTAG00000040144	P->P	synonymous
chr1	58087270	G	C	ENSBTAT00000001635, ENSBTAG00000001235	Q->E	missense
chr1	58087270	G	C	NM_001099374, CD200R1L	Q->E	missense
chr1	58091493	G	A	ENSBTAT00000001635, ENSBTAG00000001235	S->F	missense
chr1	58091493	G	A	NM_001099374, CD200R1L	S->F	missense
chr1	58091553	C	T	ENSBTAT00000001635, ENSBTAG00000001235	S->N	missense
chr1	58091553	C	T	NM_001099374, CD200R1L	S->N	missense
chr1	58091554	T	C	ENSBTAT00000001635, ENSBTAG00000001235	S->G	missense
chr1	58091554	T	C	NM_001099374, CD200R1L	S->G	missense
chr1	58091567	T	A	ENSBTAT00000001635, ENSBTAG00000001235	T->T	synonymous
chr1	58091567	T	A	NM_001099374, CD200R1L	T->T	synonymous
chr1	58091570	G	A	ENSBTAT00000001635, ENSBTAG00000001235	S->S	synonymous
chr1	58091570	G	A	NM_001099374, CD200R1L	S->S	synonymous
chr1	58091578	C	T	ENSBTAT00000001635, ENSBTAG00000001235	V->I	missense
chr1	58091578	C	T	NM_001099374, CD200R1L	V->I	missense
chr1	58091591	G	A	ENSBTAT00000001635, ENSBTAG00000001235	D->D	synonymous
chr1	58091591	G	A	NM_001099374, CD200R1L	D->D	synonymous
chr1	58091592	T	C	ENSBTAT00000001635, ENSBTAG00000001235	D->G->G	missense:MNP
chr1	58091592	T	C	NM_001099374, CD200R1L	D->G->G	missense:MNP
chr1	58091606	T	C	ENSBTAT00000001635, ENSBTAG00000001235	G->G	synonymous
chr1	58091606	T	C	NM_001099374, CD200R1L	G->G	synonymous
chr1	58091607	C	T	ENSBTAT00000001635, ENSBTAG00000001235	G->E->E	missense:MNP
chr1	58091607	C	T	NM_001099374, CD200R1L	G->E->E	missense:MNP
chr1	58091720	T	C	ENSBTAT00000001635, ENSBTAG00000001235	P->P	synonymous
chr1	58091720	T	C	NM_001099374, CD200R1L	P->P	synonymous
chr1	58091952	C	T	ENSBTAT00000001635, ENSBTAG00000001235	A->T	missense
chr1	58091952	C	T	NM_001099374, CD200R1L	A->T	missense
chr1	58092042	C	T	ENSBTAT00000001635, ENSBTAG00000001235	G->R	missense
chr1	58092042	C	T	NM_001099374, CD200R1L	G->R	missense
chr1	58092051	G	A	ENSBTAT00000001635, ENSBTAG00000001235	P->S	missense
chr1	58092051	G	A	NM_001099374, CD200R1L	P->S	missense
chr1	58092095	C	T	ENSBTAT00000001635, ENSBTAG00000001235	S->N	missense
chr1	58092095	C	T	NM_001099374, CD200R1L	S->N	missense
chr1	58092135	T	C	ENSBTAT00000001635, ENSBTAG00000001235	T->A	missense
chr1	58092135	T	C	NM_001099374, CD200R1L	T->A	missense
chr1	58092137	T	G	ENSBTAT00000001635, ENSBTAG00000001235	D->A	missense
chr1	58092137	T	G	NM_001099374, CD200R1L	D->A	missense
chr1	58104365	G	A	ENSBTAT00000001635, ENSBTAG00000001235	H->Y	missense
chr1	58104365	G	A	NM_001099374, CD200R1L	H->Y	missense
chr1	58104425	C	T	ENSBTAT00000001635, ENSBTAG00000001235	A->T	missense
chr1	58104425	C	T	NM_001099374, CD200R1L	A->T	missense
chr1	58152890	G	A	ENSBTAT00000032325, ENSBTAG00000006534	V->M	missense
chr1	58152890	G	A	NM_001075828, GTPBP8	V->M	missense
chr1	58170618	G	C	ENSBTAT00000007523, ENSBTAG00000005723	Q->E	missense
chr1	58170777	A	T	ENSBTAT00000007523, ENSBTAG00000005723	L->I	missense
chr1	58173198	G	C	ENSBTAT00000007523, ENSBTAG00000005723	T->S	missense
chr1	58176127	T	A	ENSBTAT00000007523, ENSBTAG00000005723	S->S	synonymous
chr1	58185741	C	G	ENSBTAT00000007523, ENSBTAG00000005723	T->T	synonymous
chr1	58428088	C	T	ENSBTAT00000018474, ENSBTAG00000013909	A->A	synonymous
chr1	58428088	C	T	NM_001206219, BOC	A->A	synonymous
chr1	58428892	C	A	ENSBTAT00000018474, ENSBTAG00000013909	P->H	missense
chr1	58428892	C	A	NM_001206219, BOC	P->H	missense
chr1	58428983	T	C	ENSBTAT00000018474, ENSBTAG00000013909	V->V	synonymous
chr1	58428983	T	C	NM_001206219, BOC	V->V	synonymous
chr1	58452876	G	A	ENSBTAT00000018474, ENSBTAG00000013909	S->S	synonymous
chr1	58452876	G	A	NM_001206219, BOC	S->S	synonymous
chr1	58452937	G	T	ENSBTAT00000018474, ENSBTAG00000013909	V->L	missense
chr1	58452937	G	T	NM_001206219, BOC	V->L	missense
chr1	58458153	C	T	ENSBTAT00000018474, ENSBTAG00000013909	R->W	missense
chr1	58458153	C	T	NM_001206219, BOC	R->W	missense
chr1	58458582	C	T	ENSBTAT00000018474, ENSBTAG00000013909	S->S	synonymous
chr1	58458582	C	T	NM_001206219, BOC	S->S	synonymous
chr1	58461913	C	T	ENSBTAT00000018474, ENSBTAG00000013909	I->I	synonymous
chr1	58461913	C	T	NM_001206219, BOC	I->I	synonymous
chr1	58461946	A	G	ENSBTAT00000018474, ENSBTAG00000013909	Q->Q	synonymous
chr1	58461946	A	G	NM_001206219, BOC	Q->Q	synonymous
chr1	58462866	G	A	ENSBTAT00000018474, ENSBTAG00000013909	V->M	missense
chr1	58462866	G	A	NM_001206219, BOC	V->M	missense
chr1	58463664	C	T	ENSBTAT00000018474, ENSBTAG00000013909	P->L	missense
chr1	58463664	C	T	NM_001206219, BOC	P->L	missense
chr1	58463767	G	C	ENSBTAT00000018474, ENSBTAG00000013909	T->T	synonymous
chr1	58463767	G	C	NM_001206219, BOC	T->T	synonymous
chr1	58464738	C	T	ENSBTAT00000018474, ENSBTAG00000013909	P->P	synonymous
chr1	58464738	C	T	NM_001206219, BOC	P->P	synonymous
chr1	58469436	C	T	ENSBTAT00000063957, ENSBTAG00000013920	G->D	missense
chr1	58479744	C	T	ENSBTAT00000063957, ENSBTAG00000013920	L->L	synonymous
chr1	58500479	T	C	ENSBTAT00000063957, ENSBTAG00000013920	K->K	synonymous
chr1	58507279	G	A	ENSBTAT00000063957, ENSBTAG00000013920	S->L	missense
chr1	58514029	G	A	ENSBTAT00000063957, ENSBTAG00000013920	S->S	synonymous
chr1	58517170	C	T	ENSBTAT00000063957, ENSBTAG00000013920	L->L	synonymous
chr1	58517226	G	A	ENSBTAT00000063957, ENSBTAG00000013920	R->C	missense
chr1	58522092	T	G	ENSBTAT00000018490, ENSBTAG00000013920	G->G	synonymous
chr1	58522092	T	G	ENSBTAT00000063957, ENSBTAG00000013920	G->G	synonymous
chr1	58522204	A	G	ENSBTAT00000018490, ENSBTAG00000013920	F->S	missense
chr1	58522871	T	C	ENSBTAT00000018490, ENSBTAG00000013920	T->A	missense
chr1	58522920	C	A	ENSBTAT00000018490, ENSBTAG00000013920	L->F	missense
chr1	58541159	T	C	ENSBTAT00000018490, ENSBTAG00000013920	K->K	synonymous
chr1	58541248	C	A	ENSBTAT00000018490, ENSBTAG00000013920	A->S	missense
chr1	58544994	T	C	ENSBTAT00000018490, ENSBTAG00000013920	S->S	synonymous
chr1	58545833	G	A	ENSBTAT00000018490, ENSBTAG00000013920	S->L	missense
chr1	58552376	A	G	ENSBTAT00000018490, ENSBTAG00000013920	I->T	missense
chr1	58553797	T	C	ENSBTAT00000018490, ENSBTAG00000013920	N->S	missense
chr1	58560166	C	T	ENSBTAT00000018490, ENSBTAG00000013920	E->E	synonymous
chr1	58561954	T	A	ENSBTAT00000018490, ENSBTAG00000013920	G->G	synonymous
chr1	58562131	G	A	ENSBTAT00000018490, ENSBTAG00000013920	Y->Y	synonymous
chr1	58563889	T	C	ENSBTAT00000018490, ENSBTAG00000013920	R->R	synonymous
chr1	58566295	G	A	ENSBTAT00000018490, ENSBTAG00000013920	T->T	synonymous
chr1	58571802	C	T	ENSBTAT00000018490, ENSBTAG00000013920	R->H	missense
chr1	58575428	G	A	ENSBTAT00000018490, ENSBTAG00000013920	T->I	missense
chr1	58587114	C	T	ENSBTAT00000057527, ENSBTAG00000013937	R->H	missense
chr1	58587114	C	T	NM_001038117, SPICE1	R->H	missense
chr1	58593684	T	C	ENSBTAT00000057527, ENSBTAG00000013937	Q->R	missense
chr1	58593684	T	C	NM_001038117, SPICE1	Q->R	missense
chr1	58593687	G	A	ENSBTAT00000057527, ENSBTAG00000013937	S->F	missense
chr1	58593687	G	A	NM_001038117, SPICE1	S->F	missense
chr1	58593817	C	T	ENSBTAT00000057527, ENSBTAG00000013937	A->T	missense
chr1	58593817	C	T	NM_001038117, SPICE1	A->T	missense
chr1	58601840	T	C	ENSBTAT00000057527, ENSBTAG00000013937	R->R	synonymous
chr1	58601840	T	C	NM_001038117, SPICE1	R->R	synonymous
chr1	58606018	A	G	ENSBTAT00000057527, ENSBTAG00000013937	G->G	synonymous
chr1	58606018	A	G	NM_001038117, SPICE1	G->G	synonymous
chr1	58621249	T	G	ENSBTAT00000057527, ENSBTAG00000013937	K->Q	missense
chr1	58621249	T	G	NM_001038117, SPICE1	K->Q	missense
chr1	58621549	T	C	ENSBTAT00000057527, ENSBTAG00000013937	D->G	missense
chr1	58621549	T	C	NM_001038117, SPICE1	D->G	missense
chr1	58621626	A	G	ENSBTAT00000057527, ENSBTAG00000013937	L->L	synonymous
chr1	58621626	A	G	NM_001038117, SPICE1	L->L	synonymous
chr1	58662740	A	G	NM_001205633, SIDT1	V->V	synonymous
chr1	58662807	C	G	NM_001205633, SIDT1	Q->E	missense
chr1	58662813	G	A	NM_001205633, SIDT1	D->N	missense
chr1	58706629	G	A	ENSBTAT00000017678, ENSBTAG00000013292	E->K	missense
chr1	58706629	G	A	NM_001205633, SIDT1	E->K	missense
chr1	58726930	A	T	ENSBTAT00000017678, ENSBTAG00000013292	Y->F	missense
chr1	58726930	A	T	NM_001205633, SIDT1	Y->F	missense
chr1	58744080	C	A	ENSBTAT00000017678, ENSBTAG00000013292	T->T	synonymous
chr1	58745096	C	T	ENSBTAT00000017678, ENSBTAG00000013292	P->S	missense
chr1	58745111	G	A	ENSBTAT00000017678, ENSBTAG00000013292	V->I	missense
chr1	58750854	T	C	ENSBTAT00000017678, ENSBTAG00000013292	N->N	synonymous
chr1	58750854	T	C	NM_001205633, SIDT1	N->N	synonymous
chr1	58750911	A	T	ENSBTAT00000017678, ENSBTAG00000013292	G->G	synonymous
chr1	58750911	A	T	NM_001205633, SIDT1	G->G	synonymous
chr1	58752436	C	T	ENSBTAT00000017678, ENSBTAG00000013292	L->L	synonymous
chr1	58752436	C	T	NM_001205633, SIDT1	L->L	synonymous
chr1	58756004	A	G	ENSBTAT00000065266, ENSBTAG00000013292	K->R	missense
chr1	58756029	C	T	ENSBTAT00000065266, ENSBTAG00000013292	G->G	synonymous
chr1	58756030	A	G	ENSBTAT00000065266, ENSBTAG00000013292	I->V->V	missense:MNP
chr1	58756032	A	T	ENSBTAT00000065266, ENSBTAG00000013292	I->I	synonymous
chr1	58756047	C	T	ENSBTAT00000065266, ENSBTAG00000013292	P->P	synonymous
chr1	58756078	A	C	ENSBTAT00000065266, ENSBTAG00000013292	I->L	missense
chr1	58756271	A	G	ENSBTAT00000065266, ENSBTAG00000013292	Y->C	missense
chr1	58756314	T	C	ENSBTAT00000017678, ENSBTAG00000013292	A->A	synonymous
chr1	58756314	T	C	ENSBTAT00000065266, ENSBTAG00000013292	A->A	synonymous
chr1	58756314	T	C	NM_001205633, SIDT1	A->A	synonymous
chr1	58756374	C	T	ENSBTAT00000017678, ENSBTAG00000013292	Y->Y	synonymous
chr1	58756374	C	T	ENSBTAT00000065266, ENSBTAG00000013292	Y->Y	synonymous
chr1	58756374	C	T	NM_001205633, SIDT1	Y->Y	synonymous
chr1	58757076	A	G	ENSBTAT00000017678, ENSBTAG00000013292	M->V	missense
chr1	58757076	A	G	ENSBTAT00000065266, ENSBTAG00000013292	M->V	missense
chr1	58757076	A	G	NM_001205633, SIDT1	M->V	missense
chr1	58761479	G	A	ENSBTAT00000017678, ENSBTAG00000013292	R->Q	missense
chr1	58761479	G	A	ENSBTAT00000065266, ENSBTAG00000013292	R->Q	missense
chr1	58761479	G	A	NM_001205633, SIDT1	R->Q	missense
chr1	58768744	G	A	ENSBTAT00000017678, ENSBTAG00000013292	R->Q	missense
chr1	58768744	G	A	ENSBTAT00000065266, ENSBTAG00000013292	R->Q	missense
chr1	58768744	G	A	NM_001205633, SIDT1	R->Q	missense
chr1	58768751	G	A	ENSBTAT00000017678, ENSBTAG00000013292	R->R	synonymous
chr1	58768751	G	A	ENSBTAT00000065266, ENSBTAG00000013292	R->R	synonymous
chr1	58768751	G	A	NM_001205633, SIDT1	R->R	synonymous
chr1	58768979	G	A	ENSBTAT00000017678, ENSBTAG00000013292	V->V	synonymous
chr1	58768979	G	A	ENSBTAT00000065266, ENSBTAG00000013292	V->V	synonymous
chr1	58768979	G	A	NM_001205633, SIDT1	V->V	synonymous
chr1	58771716	A	G	ENSBTAT00000017678, ENSBTAG00000013292	L->L	synonymous
chr1	58771716	A	G	ENSBTAT00000065266, ENSBTAG00000013292	L->L	synonymous
chr1	58771716	A	G	NM_001205633, SIDT1	L->L	synonymous
chr1	58771738	C	A	ENSBTAT00000017678, ENSBTAG00000013292	R->R	synonymous
chr1	58771738	C	A	ENSBTAT00000065266, ENSBTAG00000013292	R->R	synonymous
chr1	58771738	C	A	NM_001205633, SIDT1	R->R	synonymous
chr1	58791229	C	T	ENSBTAT00000027966, ENSBTAG00000021000	L->L	synonymous
chr1	58791418	T	C	ENSBTAT00000027966, ENSBTAG00000021000	T->T	synonymous
chr1	58791571	G	A	ENSBTAT00000027966, ENSBTAG00000021000	F->F	synonymous
chr1	58792012	C	G	ENSBTAT00000027966, ENSBTAG00000021000	P->P	synonymous
chr1	58792032	C	T	ENSBTAT00000027966, ENSBTAG00000021000	V->I	missense
chr1	58793058	C	G	ENSBTAT00000027966, ENSBTAG00000021000	A->P	missense
chr1	58793684	T	C	ENSBTAT00000027966, ENSBTAG00000021000	N->S	missense
chr1	58793915	T	C	ENSBTAT00000027966, ENSBTAG00000021000	D->G	missense
chr1	58793931	T	C	ENSBTAT00000027966, ENSBTAG00000021000	I->V	missense
chr1	58793984	C	T	ENSBTAT00000027966, ENSBTAG00000021000	S->N	missense
chr1	58794860	T	C	ENSBTAT00000027966, ENSBTAG00000021000	Q->R	missense
chr1	58795353	A	G	ENSBTAT00000027966, ENSBTAG00000021000	L->L	synonymous
chr1	58795666	C	T	ENSBTAT00000027966, ENSBTAG00000021000	P->P	synonymous
chr1	58795699	T	C	ENSBTAT00000027966, ENSBTAG00000021000	G->G	synonymous
chr1	58795888	A	G	ENSBTAT00000027966, ENSBTAG00000021000	N->N	synonymous
chr1	58796290	C	T	ENSBTAT00000027966, ENSBTAG00000021000	M->I	missense
chr1	58796307	C	A	ENSBTAT00000027966, ENSBTAG00000021000	A->S	missense
chr1	58796835	T	G	ENSBTAT00000027966, ENSBTAG00000021000	I->L	missense
chr1	58851173	T	C	ENSBTAT00000031069, ENSBTAG00000007784	A->A	synonymous
chr1	58851173	T	C	NM_001075750, NAA50	A->A	synonymous
chr1	58927918	C	G	ENSBTAT00000055158, ENSBTAG00000002703	A->A	synonymous
chr1	58927918	C	G	NM_174504, ATP6V1A	A->A	synonymous
chr1	58932982	A	G	ENSBTAT00000055158, ENSBTAG00000002703	K->K	synonymous
chr1	58932982	A	G	NM_174504, ATP6V1A	K->K	synonymous
chr1	58933046	T	C	ENSBTAT00000055158, ENSBTAG00000002703	L->L	synonymous
chr1	58933046	T	C	NM_174504, ATP6V1A	L->L	synonymous
chr1	59004895	T	C	ENSBTAT00000065613, ENSBTAG00000004971	L->P	missense
chr1	59026474	G	C	ENSBTAT00000065613, ENSBTAG00000004971	G->R	missense
chr1	59026541	G	A	ENSBTAT00000006545, ENSBTAG00000004971	R->Q	missense
chr1	59026541	G	A	ENSBTAT00000065613, ENSBTAG00000004971	R->Q	missense
chr1	59026541	G	A	NM_001103229, GRAMD1C	R->Q	missense
chr1	59034174	G	T	ENSBTAT00000006545, ENSBTAG00000004971	W->C	missense
chr1	59034174	G	T	ENSBTAT00000065613, ENSBTAG00000004971	W->C	missense
chr1	59034174	G	T	NM_001103229, GRAMD1C	W->C	missense
chr1	59034279	G	A	ENSBTAT00000006545, ENSBTAG00000004971	E->E	synonymous
chr1	59034279	G	A	ENSBTAT00000065613, ENSBTAG00000004971	E->E	synonymous
chr1	59034279	G	A	NM_001103229, GRAMD1C	E->E	synonymous
chr1	59056893	T	C	ENSBTAT00000006545, ENSBTAG00000004971	S->S	synonymous
chr1	59056893	T	C	ENSBTAT00000065613, ENSBTAG00000004971	S->S	synonymous
chr1	59056893	T	C	NM_001103229, GRAMD1C	S->S	synonymous
chr1	59057422	G	A	ENSBTAT00000006545, ENSBTAG00000004971	R->H	missense
chr1	59057422	G	A	ENSBTAT00000065613, ENSBTAG00000004971	R->H	missense
chr1	59057422	G	A	NM_001103229, GRAMD1C	R->H	missense
chr1	59071974	G	A	ENSBTAT00000006547, ENSBTAG00000004974	T->T	synonymous
chr1	59071974	G	A	NM_001192314, ZDHHC23	T->T	synonymous
chr1	59082304	T	G	ENSBTAT00000006550, ENSBTAG00000004975	A->A	synonymous
chr1	59094807	G	A	ENSBTAT00000006550, ENSBTAG00000004975	I->I	synonymous
chr1	59121072	C	T	ENSBTAT00000006550, ENSBTAG00000004975	A->A	synonymous
chr1	59122017	C	T	ENSBTAT00000006550, ENSBTAG00000004975	R->Q	missense
chr1	59122103	A	C	ENSBTAT00000006550, ENSBTAG00000004975	L->L	synonymous
chr1	59160893	C	T	ENSBTAT00000006550, ENSBTAG00000004975	R->K	missense
chr1	59171781	A	G	ENSBTAT00000006550, ENSBTAG00000004975	L->P	missense
chr1	59171850	T	C	ENSBTAT00000006550, ENSBTAG00000004975	Q->R	missense
[truncated: 209,380+ more rows]

## Sheet: BBC_indels
BBC indels
Chromosome	Position	Reference allele	Alternative allele	Transcript_ID, Gene_ID	Amino acide change	Annotation
chr1	1110914	*	+A	ENSBTAT00000065213, ENSBTAG00000021997	INS	FRAME_SHIFT
chr1	1110914	*	+A	ENSBTAT00000029333, ENSBTAG00000021997	INS	FRAME_SHIFT
chr1	1309564	*	+A	ENSBTAT00000012106, DNAJC28	INS	FRAME_SHIFT
chr1	3972342	*	-GACCACTGTCAGGA	ENSBTAT00000049339, Q05B46_BOVIN	DEL	FRAME_SHIFT
chr1	6529861	*	-A	ENSBTAT00000065332, RWDD2B	DEL	FRAME_SHIFT
chr1	9249225	*	+A	ENSBTAT00000049039, CYYR1	INS	FRAME_SHIFT
chr1	30301126	*	-GC	ENSBTAT00000065610, ENSBTAG00000046383	DEL	FRAME_SHIFT
chr1	30301129	*	+GG	ENSBTAT00000065610, ENSBTAG00000046383	INS	FRAME_SHIFT
chr1	41956060	*	-AATAC	ENSBTAT00000032401, ENSBTAG00000023668	DEL	FRAME_SHIFT
chr1	41998635	*	+A	ENSBTAT00000064175, OR5AC2	INS	FRAME_SHIFT
chr1	42309426	*	-AACA	ENSBTAT00000065496, ENSBTAG00000047371	DEL	FRAME_SHIFT
chr1	42358521	*	-A	ENSBTAT00000054123, ENSBTAG00000037820	DEL	FRAME_SHIFT
chr1	44948897	*	+T	ENSBTAT00000001001, SGOL1	INS	FRAME_SHIFT
chr1	44948897	*	+T	ENSBTAT00000000999, SGOL1	INS	FRAME_SHIFT
chr1	45078662	*	-GA	ENSBTAT00000002795, A6QNW2_BOVIN	DEL	FRAME_SHIFT
chr1	45507142	*	+A	ENSBTAT00000004503, ENSBTAG00000016363	INS	FRAME_SHIFT
chr1	47063516	*	-GGAGGGACCT	ENSBTAT00000065922, ENSBTAG00000047093	DEL	FRAME_SHIFT
chr1	53530599	*	-CT	ENSBTAT00000032372, MYH15	DEL	FRAME_SHIFT
chr1	53771758	*	+A	ENSBTAT00000008099, Q17R11_BOVIN	INS	FRAME_SHIFT
chr1	54512679	*	-TTTTTTT	ENSBTAT00000055391, ENSBTAG00000038103	DEL	FRAME_SHIFT
chr1	58028252	*	+C	ENSBTAT00000056936, ENSBTAG00000040144	INS	FRAME_SHIFT
chr1	58571768	*	+ATCATCTTGAAATGAACTTGAACTTCATT	ENSBTAT00000018490, WDR52	INS	FRAME_SHIFT
chr1	65944981	*	+G	ENSBTAT00000061425, B8YB76_BOVIN	INS	FRAME_SHIFT
chr1	66600463	*	-AGCAG	ENSBTAT00000002501, POLQ	DEL	FRAME_SHIFT
chr1	68611308	*	-T	ENSBTAT00000019385, MYLK	DEL	FRAME_SHIFT
chr1	68910778	*	+AG	ENSBTAT00000054897, A6H6Y2_BOVIN	INS	FRAME_SHIFT
chr1	69394429	*	-G	ENSBTAT00000038922, ENSBTAG00000046935	DEL	FRAME_SHIFT
chr1	71844950	*	-AT	ENSBTAT00000063541, PIGX	DEL	FRAME_SHIFT
chr1	72024906	*	+C	ENSBTAT00000015483, PIGZ	INS	FRAME_SHIFT
chr1	72024911	*	-CACTCTTGAGTGGGAAGCGG	ENSBTAT00000015483, PIGZ	DEL	FRAME_SHIFT
chr1	72025532	*	+G	ENSBTAT00000015483, PIGZ	INS	FRAME_SHIFT
chr1	72025561	*	+G	ENSBTAT00000015483, PIGZ	INS	FRAME_SHIFT
chr1	81107173	*	-T	ENSBTAT00000053071, KNG1	DEL	FRAME_SHIFT
chr1	81107173	*	-T	ENSBTAT00000006755, KNG1	DEL	FRAME_SHIFT
chr1	81107177	*	-TGGTT	ENSBTAT00000053071, KNG1	DEL	FRAME_SHIFT
chr1	81107177	*	-TGGTT	ENSBTAT00000006755, KNG1	DEL	FRAME_SHIFT
chr1	81674969	*	+A	ENSBTAT00000006711, DGKG	INS	FRAME_SHIFT
chr1	83479899	*	-G	ENSBTAT00000032213, EIF4G1	DEL	FRAME_SHIFT
chr1	83609382	*	+GC	ENSBTAT00000025757, DVL3	INS	FRAME_SHIFT
chr1	88532067	*	-A	ENSBTAT00000012168, PK3CA_BOVIN	DEL	FRAME_SHIFT
chr1	98232896	*	-CA	ENSBTAT00000024261, SAMD7	DEL	FRAME_SHIFT
chr1	98236862	*	+TATTTCTCTT	ENSBTAT00000054751, SAMD7	INS	FRAME_SHIFT
chr1	98319435	*	-AA	ENSBTAT00000014128, LRRC31	DEL	FRAME_SHIFT
chr1	104146875	*	+T	ENSBTAT00000024367, E1BHJ0_BOVIN	INS	FRAME_SHIFT
chr1	105172388	*	-C	ENSBTAT00000039021, ENSBTAG00000027213	DEL	FRAME_SHIFT
chr1	110023879	*	+AC	ENSBTAT00000063226, ENSBTAG00000047570	INS	FRAME_SHIFT
chr1	110023883	*	+CGCCCCA	ENSBTAT00000063226, ENSBTAG00000047570	INS	FRAME_SHIFT
chr1	110025661	*	-G	ENSBTAT00000063226, ENSBTAG00000047570	DEL	FRAME_SHIFT
chr1	110026176	*	-CTCAAATT	ENSBTAT00000063226, ENSBTAG00000047570	DEL	FRAME_SHIFT
chr1	112539576	*	+CATC	ENSBTAT00000012673, GPRC6A	INS	FRAME_SHIFT
chr1	112558121	*	+GGAT	ENSBTAT00000012673, GPRC6A	INS	FRAME_SHIFT
chr1	113594601	*	-TA	ENSBTAT00000015298, ENSBTAG00000024623	DEL	FRAME_SHIFT
chr1	113594603	*	-TT	ENSBTAT00000015298, ENSBTAG00000024623	DEL	FRAME_SHIFT
chr1	116252950	*	-T	ENSBTAT00000005998, MBNL1	DEL	FRAME_SHIFT
chr1	116252973	*	-T	ENSBTAT00000005998, MBNL1	DEL	FRAME_SHIFT
chr1	116252976	*	-T	ENSBTAT00000005998, MBNL1	DEL	FRAME_SHIFT
chr1	116252982	*	-A	ENSBTAT00000005998, MBNL1	DEL	FRAME_SHIFT
chr1	116253010	*	-T	ENSBTAT00000005998, MBNL1	DEL	FRAME_SHIFT
chr1	117579734	*	+T	ENSBTAT00000010239, MED12L	INS	FRAME_SHIFT
chr1	117622740	*	+ACATAAATTTATAC	ENSBTAT00000010239, MED12L	INS	FRAME_SHIFT
chr1	117622744	*	-T	ENSBTAT00000010239, MED12L	DEL	FRAME_SHIFT
chr1	117879564	*	-T	ENSBTAT00000010239, MED12L	DEL	FRAME_SHIFT
chr1	118391024	*	+T	ENSBTAT00000001756, FAM194A	INS	FRAME_SHIFT
chr1	119945281	*	-C	ENSBTAT00000003112, HPS3	DEL	FRAME_SHIFT
chr1	119958887	*	+TAAAGTGAATGAT	ENSBTAT00000003112, HPS3	INS	FRAME_SHIFT
chr1	119962236	*	-T	ENSBTAT00000025515, ENSBTAG00000048150	DEL	FRAME_SHIFT
chr1	126941055	*	+T	ENSBTAT00000012063, U2SURP	INS	FRAME_SHIFT
chr1	126941055	*	+TT	ENSBTAT00000012063, U2SURP	INS	FRAME_SHIFT
chr1	135882736	*	-T	ENSBTAT00000009235, CEP63	DEL	FRAME_SHIFT
chr1	140443874	*	+C	ENSBTAT00000050188, ENSBTAG00000035701	INS	FRAME_SHIFT
chr1	140443899	*	-G	ENSBTAT00000050188, ENSBTAG00000035701	DEL	FRAME_SHIFT
chr1	140444138	*	-TA	ENSBTAT00000050188, ENSBTAG00000035701	DEL	FRAME_SHIFT
chr1	143368353	*	-GGCAGGAGGGCTGGCAGAACCT	ENSBTAT00000064310, ENSBTAG00000045771	DEL	FRAME_SHIFT
chr1	143862146	*	-C	ENSBTAT00000043589, UMODL1	DEL	FRAME_SHIFT
chr1	143862157	*	+G	ENSBTAT00000043589, UMODL1	INS	FRAME_SHIFT
chr1	143862205	*	+A	ENSBTAT00000043589, UMODL1	INS	FRAME_SHIFT
chr1	147058340	*	-TTTT	ENSBTAT00000043357, SLC19A1	DEL	FRAME_SHIFT
chr1	147058344	*	+GCGC	ENSBTAT00000043357, SLC19A1	INS	FRAME_SHIFT
chr1	147709544	*	-C	ENSBTAT00000004104, YBEY	DEL	FRAME_SHIFT
chr1	150064523	*	-CA	ENSBTAT00000031838, CBR1	DEL	FRAME_SHIFT
chr1	150064529	*	+CA	ENSBTAT00000031838, CBR1	INS	FRAME_SHIFT
chr2	4333329	*	+T	ENSBTAT00000007163, UGGT1	INS	FRAME_SHIFT
chr2	5345447	*	-G	ENSBTAT00000049425, F1MLQ1_BOVIN	DEL	FRAME_SHIFT
chr2	6218379	*	-ATGAACACTCC	ENSBTAT00000015674, GDF8_BOVIN	DEL	FRAME_SHIFT
chr2	7797009	*	-C	ENSBTAT00000009398, Q32L51_BOVIN	DEL	FRAME_SHIFT
chr2	10615791	*	-T	ENSBTAT00000013129, ENSBTAG00000003645	DEL	FRAME_SHIFT
chr2	10615791	*	-T	ENSBTAT00000047870, ENSBTAG00000003645	DEL	FRAME_SHIFT
chr2	10706607	*	+T	ENSBTAT00000013129, ENSBTAG00000003645	INS	FRAME_SHIFT
chr2	10706607	*	+T	ENSBTAT00000047870, ENSBTAG00000003645	INS	FRAME_SHIFT
chr2	10706611	*	+T	ENSBTAT00000013129, ENSBTAG00000003645	INS	FRAME_SHIFT
chr2	10706611	*	+T	ENSBTAT00000047870, ENSBTAG00000003645	INS	FRAME_SHIFT
chr2	10706624	*	+C	ENSBTAT00000013129, ENSBTAG00000003645	INS	FRAME_SHIFT
chr2	10706624	*	+C	ENSBTAT00000047870, ENSBTAG00000003645	INS	FRAME_SHIFT
chr2	10706630	*	+T	ENSBTAT00000013129, ENSBTAG00000003645	INS	FRAME_SHIFT
chr2	10706630	*	+T	ENSBTAT00000047870, ENSBTAG00000003645	INS	FRAME_SHIFT
chr2	14623641	*	+AA	ENSBTAT00000060951, PPP1R1C	INS	FRAME_SHIFT
chr2	15673884	*	+C	ENSBTAT00000061641, UBE2E3	INS	FRAME_SHIFT
chr2	16882488	*	+A	ENSBTAT00000028962, CWC22	INS	FRAME_SHIFT
chr2	18175906	*	-A	ENSBTAT00000061449, ENSBTAG00000026986	DEL	FRAME_SHIFT
chr2	19705914	*	-G	ENSBTAT00000028757, ENSBTAG00000021580	DEL	FRAME_SHIFT
chr2	23974881	*	-T	ENSBTAT00000061074, RAPGEF4	DEL	FRAME_SHIFT
chr2	25154818	*	-CTTGGTATTTTCAGTC	ENSBTAT00000021849, METTL8	DEL	FRAME_SHIFT
chr2	31630707	*	+A	ENSBTAT00000007231, ENSBTAG00000005501	INS	FRAME_SHIFT
chr2	31688791	*	-CTCCCTTCCCCCTCCTCCCGTG	ENSBTAT00000063852, ENSBTAG00000047880	DEL	FRAME_SHIFT
chr2	31688815	*	-CTCGCCCCTTCCCTCTCCTCCCGTGGCTGCCT	ENSBTAT00000063852, ENSBTAG00000047880	DEL	FRAME_SHIFT
chr2	31688841	*	+C	ENSBTAT00000063852, ENSBTAG00000047880	INS	FRAME_SHIFT
chr2	31688843	*	+TCCCCCTTCCCCCTCCCCCCGTG	ENSBTAT00000063852, ENSBTAG00000047880	INS	FRAME_SHIFT
chr2	34661553	*	-AAAT	ENSBTAT00000020366, SLC4A10	DEL	FRAME_SHIFT
chr2	38785209	*	+G	ENSBTAT00000017162, ERMIN_BOVIN	INS	FRAME_SHIFT
chr2	46745845	*	+G	ENSBTAT00000064259, LYPD6	INS	FRAME_SHIFT
chr2	46745848	*	-A	ENSBTAT00000064259, LYPD6	DEL	FRAME_SHIFT
chr2	49400588	*	-ACATTTGGCCT	ENSBTAT00000055186, ENSBTAG00000046032	DEL	FRAME_SHIFT
chr2	49736035	*	-CGTCCTCTTCCTTGGCCTCGGCCT	ENSBTAT00000016418, ENSBTAG00000012376	DEL	FRAME_SHIFT
chr2	59143391	*	-AATACTC	ENSBTAT00000002130, ENSBTAG00000001627	DEL	FRAME_SHIFT
chr2	59143639	*	-T	ENSBTAT00000002130, ENSBTAG00000001627	DEL	FRAME_SHIFT
chr2	59878729	*	+G	ENSBTAT00000061537, THSD7B	INS	FRAME_SHIFT
chr2	59878729	*	+G	ENSBTAT00000064636, THSD7B	INS	FRAME_SHIFT
chr2	74649137	*	+T	ENSBTAT00000045258, ENSBTAG00000031918	INS	FRAME_SHIFT
chr2	77076090	*	-T	ENSBTAT00000045240, CNTNAP5	DEL	FRAME_SHIFT
chr2	77076100	*	-A	ENSBTAT00000045240, CNTNAP5	DEL	FRAME_SHIFT
chr2	79926773	*	+T	ENSBTAT00000061553, B0JYL6_BOVIN	INS	FRAME_SHIFT
chr2	85001870	*	-A	ENSBTAT00000038364, DNAH7	DEL	FRAME_SHIFT
chr2	85259297	*	+T	ENSBTAT00000038307, HECW2	INS	FRAME_SHIFT
chr2	85259297	*	+T	ENSBTAT00000063835, HECW2	INS	FRAME_SHIFT
chr2	85259297	*	+TT	ENSBTAT00000038307, HECW2	INS	FRAME_SHIFT
chr2	85259297	*	+TT	ENSBTAT00000063835, HECW2	INS	FRAME_SHIFT
chr2	85764072	*	+AG	ENSBTAT00000010228, GTF3C3	INS	FRAME_SHIFT
chr2	85982785	*	+TTAGTGGGGTTCTAGGAAAAGAAAGCAAATGTAGATGCTGTCGACATCATGGGCTGCACAGC	ENSBTAT00000029218, ANKRD44	INS	FRAME_SHIFT
chr2	89583881	*	-A	ENSBTAT00000012827, AOX1	DEL	FRAME_SHIFT
chr2	89587048	*	-C	ENSBTAT00000012827, AOX1	DEL	FRAME_SHIFT
chr2	90461684	*	+T	ENSBTAT00000055126, ALS2CR11	INS	FRAME_SHIFT
chr2	90461683	*	-T	ENSBTAT00000055126, ALS2CR11	DEL	FRAME_SHIFT
chr2	95046258	*	+GACATGCCTTCTAATAAAGGAATCTTTGAAGAAGGCATGTCAGTTTTACTCAGGTTGACTACTGGAATCTCTTTCTAAATTTGCAGTGAATCCAGTAGTCAACCTGAGTAAAACG	ENSBTAT00000044119, ZDBF2	INS	FRAME_SHIFT
chr2	95049493	*	+T	ENSBTAT00000044119, ZDBF2	INS	FRAME_SHIFT
chr2	95049510	*	+T	ENSBTAT00000044119, ZDBF2	INS	FRAME_SHIFT
chr2	95049543	*	+T	ENSBTAT00000044119, ZDBF2	INS	FRAME_SHIFT
chr2	99683566	*	+AC	ENSBTAT00000061483, ERBB4	INS	FRAME_SHIFT
chr2	99746559	*	-CAGAA	ENSBTAT00000061483, ERBB4	DEL	FRAME_SHIFT
chr2	105167174	*	-G	ENSBTAT00000005013, SMARCAL1	DEL	FRAME_SHIFT
chr2	108190906	*	-C	ENSBTAT00000027364, ASIC4	DEL	FRAME_SHIFT
chr2	108217369	*	-G	ENSBTAT00000060992, Q0VC42_BOVIN	DEL	FRAME_SHIFT
chr2	111820374	*	-AGAG	ENSBTAT00000006990, F1MKZ5_BOVIN	DEL	FRAME_SHIFT
chr2	111872664	*	+A	ENSBTAT00000022939, ACSL3	INS	FRAME_SHIFT
chr2	119718414	*	+T	ENSBTAT00000052796, Q8MI09_BOVIN	INS	FRAME_SHIFT
chr2	119990235	*	-AGCTGCT	ENSBTAT00000051973, B3GNT7	DEL	FRAME_SHIFT
chr2	120278479	*	-TA	ENSBTAT00000019953, PGAM4	DEL	FRAME_SHIFT
chr2	120910158	*	-CA	ENSBTAT00000005937, F1N6T5_BOVIN	DEL	FRAME_SHIFT
chr2	120910161	*	+GG	ENSBTAT00000005937, F1N6T5_BOVIN	INS	FRAME_SHIFT
chr2	120911738	*	-C	ENSBTAT00000005937, F1N6T5_BOVIN	DEL	FRAME_SHIFT
chr2	120911741	*	+A	ENSBTAT00000005937, F1N6T5_BOVIN	INS	FRAME_SHIFT
chr2	121552817	*	-G	ENSBTAT00000010969, RNF19B	DEL	FRAME_SHIFT
chr2	122033270	*	+C	ENSBTAT00000052158, ENSBTAG00000037902	INS	FRAME_SHIFT
chr2	122054579	*	-C	ENSBTAT00000066186, MARCKSL1	DEL	FRAME_SHIFT
chr2	122054579	*	-C	ENSBTAT00000066345, MARCKSL1	DEL	FRAME_SHIFT
chr2	122503868	*	+C	ENSBTAT00000038011, BAI2	INS	FRAME_SHIFT
chr2	122504005	*	+G	ENSBTAT00000038011, BAI2	INS	FRAME_SHIFT
chr2	122504010	*	+G	ENSBTAT00000038011, BAI2	INS	FRAME_SHIFT
chr2	122504018	*	+G	ENSBTAT00000038011, BAI2	INS	FRAME_SHIFT
chr2	122756595	*	-C	ENSBTAT00000056771, ENSBTAG00000039994	DEL	FRAME_SHIFT
chr2	125228865	*	+AA	ENSBTAT00000004157, OPRD1	INS	FRAME_SHIFT
chr2	125228865	*	+A	ENSBTAT00000004157, OPRD1	INS	FRAME_SHIFT
chr2	125600948	*	-G	ENSBTAT00000004790, ENSBTAG00000003676	DEL	FRAME_SHIFT
chr2	125829845	*	+CTGAGCAATGGGGAAC	ENSBTAT00000013110, ENSBTAG00000009937	INS	FRAME_SHIFT
chr2	125829845	*	+CTGAGCAATGGGGAAC	ENSBTAT00000046159, ENSBTAG00000009937	INS	FRAME_SHIFT
chr2	126518308	*	-AAAA	ENSBTAT00000013549, MAP3K6	DEL	FRAME_SHIFT
chr2	126518312	*	+CTTC	ENSBTAT00000013549, MAP3K6	INS	FRAME_SHIFT
chr2	127569049	*	-C	ENSBTAT00000001982, PDIK1L	DEL	FRAME_SHIFT
chr2	127664539	*	-GC	ENSBTAT00000008330, A6QR03_BOVIN	DEL	FRAME_SHIFT
chr2	127922318	*	+A	ENSBTAT00000061594, MAN1C1	INS	FRAME_SHIFT
chr2	127922319	*	-GAGG	ENSBTAT00000061594, MAN1C1	DEL	FRAME_SHIFT
chr2	127922326	*	+CTGTG	ENSBTAT00000061594, MAN1C1	INS	FRAME_SHIFT
chr2	129743758	*	+T	ENSBTAT00000063789, A6QPU3_BOVIN	INS	FRAME_SHIFT
chr2	129744088	*	-GGTTT	ENSBTAT00000063789, A6QPU3_BOVIN	DEL	FRAME_SHIFT
chr2	129744677	*	-TCTG	ENSBTAT00000063789, A6QPU3_BOVIN	DEL	FRAME_SHIFT
chr2	129744677	*	-TCTG	ENSBTAT00000037847, A6QPU3_BOVIN	DEL	FRAME_SHIFT
chr2	129793050	*	-TG	ENSBTAT00000027850, RL11_BOVIN	DEL	FRAME_SHIFT
chr2	133182004	*	-CC	ENSBTAT00000032588, Q5W1N9_BOVIN	DEL	FRAME_SHIFT
chr2	133182009	*	+TG	ENSBTAT00000032588, Q5W1N9_BOVIN	INS	FRAME_SHIFT
chr2	133933843	*	+GCGAGCAGCGCCATCACTGCCCGCTTCTCCCTTCCTGGGGCATCGGGAGGCCCCGGGCACC	ENSBTAT00000018143, PQLC2	INS	FRAME_SHIFT
chr2	133933843	*	+GCGAGCAGCGCCATCACTGCCCGCTTCTCCCTTCGGGGCGTCGGGAGGCCCCGGGCACC	ENSBTAT00000018143, PQLC2	INS	FRAME_SHIFT
chr2	136282047	*	-TTTT	ENSBTAT00000017662, SPATA21	DEL	FRAME_SHIFT
chr2	136282049	*	-TT	ENSBTAT00000017662, SPATA21	DEL	FRAME_SHIFT
chr2	136282051	*	+T	ENSBTAT00000017662, SPATA21	INS	FRAME_SHIFT
chr3	95220	*	-AA	ENSBTAT00000008123, ENSBTAG00000003249	DEL	FRAME_SHIFT
chr3	96117	*	-GT	ENSBTAT00000008123, ENSBTAG00000003249	DEL	FRAME_SHIFT
chr3	2374258	*	-ATTTA	ENSBTAT00000030463, ENSBTAG00000022504	DEL	FRAME_SHIFT
chr3	7541178	*	+A	ENSBTAT00000065802, ENSBTAG00000046175	INS	FRAME_SHIFT
chr3	7541443	*	-CAAA	ENSBTAT00000065802, ENSBTAG00000046175	DEL	FRAME_SHIFT
chr3	7542446	*	-T	ENSBTAT00000065802, ENSBTAG00000046175	DEL	FRAME_SHIFT
chr3	7849898	*	-TC	ENSBTAT00000028997, DUSP12	DEL	FRAME_SHIFT
chr3	7930046	*	+G	ENSBTAT00000029116, FCGR2_BOVIN	INS	FRAME_SHIFT
chr3	8626526	*	+TG	ENSBTAT00000064812, ENSBTAG00000027775	INS	FRAME_SHIFT
chr3	8626530	*	-GC	ENSBTAT00000064812, ENSBTAG00000027775	DEL	FRAME_SHIFT
chr3	8944724	*	+G	ENSBTAT00000007838, ENSBTAG00000024849	INS	FRAME_SHIFT
chr3	8952156	*	+G	ENSBTAT00000007838, ENSBTAG00000024849	INS	FRAME_SHIFT
chr3	9486661	*	-TG	ENSBTAT00000005672, COPA	DEL	FRAME_SHIFT
chr3	9486668	*	+CG	ENSBTAT00000005672, COPA	INS	FRAME_SHIFT
chr3	9486679	*	-CCACC	ENSBTAT00000005672, COPA	DEL	FRAME_SHIFT
chr3	9486686	*	+G	ENSBTAT00000005672, COPA	INS	FRAME_SHIFT
chr3	9486687	*	+TTGA	ENSBTAT00000005672, COPA	INS	FRAME_SHIFT
chr3	9875046	*	-GG	ENSBTAT00000001940, IGSF9	DEL	FRAME_SHIFT
chr3	9875049	*	-T	ENSBTAT00000001940, IGSF9	DEL	FRAME_SHIFT
chr3	10462575	*	+AA	ENSBTAT00000054562, ENSBTAG00000020765	INS	FRAME_SHIFT
chr3	10576801	*	+A	ENSBTAT00000030496, ENSBTAG00000022528	INS	FRAME_SHIFT
chr3	10852759	*	-A	ENSBTAT00000015297, MNDA	DEL	FRAME_SHIFT
chr3	10852760	*	+A	ENSBTAT00000015297, MNDA	INS	FRAME_SHIFT
chr3	10852758	*	-AA	ENSBTAT00000015297, MNDA	DEL	FRAME_SHIFT
chr3	11239429	*	+TA	ENSBTAT00000052741, ENSBTAG00000039653	INS	FRAME_SHIFT
chr3	11239431	*	-CC	ENSBTAT00000052741, ENSBTAG00000039653	DEL	FRAME_SHIFT
chr3	11239522	*	-AT	ENSBTAT00000052741, ENSBTAG00000039653	DEL	FRAME_SHIFT
chr3	11239525	*	+CT	ENSBTAT00000052741, ENSBTAG00000039653	INS	FRAME_SHIFT
chr3	11240003	*	+GGAA	ENSBTAT00000052741, ENSBTAG00000039653	INS	FRAME_SHIFT
chr3	11320732	*	+GAAAGTTTAA	ENSBTAT00000054833, ENSBTAG00000038669	INS	FRAME_SHIFT
chr3	11483267	*	-GCAAG	ENSBTAT00000023641, OR10R2	DEL	FRAME_SHIFT
chr3	11485865	*	+T	ENSBTAT00000023641, OR10R2	INS	FRAME_SHIFT
chr3	11848755	*	+CAGATCAGATCAGATCAGTCGCTCAGTCATGTCCAACTCTTTGCGACCCCATGAATCGCAGCACGCCA	ENSBTAT00000013155, Q1L1H6_BOVIN	INS	FRAME_SHIFT
chr3	11849986	*	-AT	ENSBTAT00000013155, Q1L1H6_BOVIN	DEL	FRAME_SHIFT
chr3	11849989	*	-A	ENSBTAT00000013155, Q1L1H6_BOVIN	DEL	FRAME_SHIFT
chr3	11994913	*	-C	ENSBTAT00000009739, A6QQB1_BOVIN	DEL	FRAME_SHIFT
chr3	12111101	*	-C	ENSBTAT00000053853, ENSBTAG00000047988	DEL	FRAME_SHIFT
chr3	12314585	*	+C	ENSBTAT00000007626, KIRREL	INS	FRAME_SHIFT
chr3	12900926	*	-A	ENSBTAT00000024922, FCRL5	DEL	FRAME_SHIFT
chr3	14286883	*	+G	ENSBTAT00000033914, GPTC4_BOVIN	INS	FRAME_SHIFT
chr3	14286886	*	+AA	ENSBTAT00000033914, GPTC4_BOVIN	INS	FRAME_SHIFT
chr3	14814706	*	+A	ENSBTAT00000047947, SSR2	INS	FRAME_SHIFT
chr3	14814708	*	+A	ENSBTAT00000047947, SSR2	INS	FRAME_SHIFT
chr3	14985736	*	+A	ENSBTAT00000065433, YY1AP1	INS	FRAME_SHIFT
chr3	14986899	*	+G	ENSBTAT00000065433, YY1AP1	INS	FRAME_SHIFT
chr3	14986899	*	+G	ENSBTAT00000065367, YY1AP1	INS	FRAME_SHIFT
chr3	14987489	*	+TG	ENSBTAT00000065367, YY1AP1	INS	FRAME_SHIFT
chr3	14990434	*	-A	ENSBTAT00000065367, YY1AP1	DEL	FRAME_SHIFT
chr3	15350208	*	-A	ENSBTAT00000005172, E1BGA4_BOVIN	DEL	FRAME_SHIFT
chr3	15575940	*	-G	ENSBTAT00000026958, F1N163_BOVIN	DEL	FRAME_SHIFT
chr3	16080181	*	+G	ENSBTAT00000009889, UBE2Q1	INS	FRAME_SHIFT
chr3	18382355	*	-G	ENSBTAT00000015611, FLG2	DEL	FRAME_SHIFT
chr3	18627219	*	-TGAAGATGAGCAGACC	ENSBTAT00000056701, RPTN	DEL	FRAME_SHIFT
chr3	18627237	*	-TCAGAGACGAGACAGGCAAACCCACA	ENSBTAT00000056701, RPTN	DEL	FRAME_SHIFT
chr3	18895886	*	-T	ENSBTAT00000046523, THEM4	DEL	FRAME_SHIFT
chr3	20464847	*	+G	ENSBTAT00000022237, ANP32E	INS	FRAME_SHIFT
chr3	20770306	*	-C	ENSBTAT00000045062, Q2QJG7_BOVIN	DEL	FRAME_SHIFT
chr3	21661221	*	+TA	ENSBTAT00000010691, RNF115	INS	FRAME_SHIFT
chr3	22111676	*	+T	ENSBTAT00000003141, BCL9	INS	FRAME_SHIFT
chr3	22512793	*	+A	ENSBTAT00000027762, CHD1L	INS	FRAME_SHIFT
chr3	22768762	*	-TC	ENSBTAT00000030871, ENSBTAG00000021104	DEL	FRAME_SHIFT
chr3	27770669	*	-A	ENSBTAT00000007608, VANGL1	DEL	FRAME_SHIFT
chr3	27770674	*	-G	ENSBTAT00000007608, VANGL1	DEL	FRAME_SHIFT
chr3	28447126	*	-T	ENSBTAT00000030769, SYCP1	DEL	FRAME_SHIFT
chr3	31983248	*	+G	ENSBTAT00000049273, ADORA3	INS	FRAME_SHIFT
chr3	32077777	*	+ACACTCAGCTCTATTCTGGTGAGATCGTCAGA	ENSBTAT00000049303, ENSBTAG00000034841	INS	FRAME_SHIFT
chr3	32152576	*	-T	ENSBTAT00000057237, ENSBTAG00000023535	DEL	FRAME_SHIFT
chr3	32152577	*	-TG	ENSBTAT00000057237, ENSBTAG00000023535	DEL	FRAME_SHIFT
chr3	32152577	*	+A	ENSBTAT00000057237, ENSBTAG00000023535	INS	FRAME_SHIFT
chr3	34230597	*	-C	ENSBTAT00000025035, MYBPHL	DEL	FRAME_SHIFT
chr3	34353119	*	+G	ENSBTAT00000001511, KIAA1324	INS	FRAME_SHIFT
chr3	34493138	*	-T	ENSBTAT00000065823, WDR47	DEL	FRAME_SHIFT
chr3	34673710	*	+ATGACGG	ENSBTAT00000009644, AKNAD1	INS	FRAME_SHIFT
chr3	34877703	*	+A	ENSBTAT00000007157, FAM102B	INS	FRAME_SHIFT
chr3	51446251	*	-T	ENSBTAT00000040291, BTBD8	DEL	FRAME_SHIFT
chr3	54058615	*	-GT	ENSBTAT00000054358, ENSBTAG00000014857	DEL	FRAME_SHIFT
chr3	54267677	*	+A	ENSBTAT00000020043, Q0IID3_BOVIN	INS	FRAME_SHIFT
chr3	54364720	*	-C	ENSBTAT00000056911, ENSBTAG00000038938	DEL	FRAME_SHIFT
chr3	54369297	*	+A	ENSBTAT00000056911, ENSBTAG00000038938	INS	FRAME_SHIFT
chr3	54369299	*	+G	ENSBTAT00000056911, ENSBTAG00000038938	INS	FRAME_SHIFT
chr3	54369301	*	+GG	ENSBTAT00000056911, ENSBTAG00000038938	INS	FRAME_SHIFT
chr3	54445912	*	+AG	ENSBTAT00000036150, ENSBTAG00000025621	INS	FRAME_SHIFT
chr3	54600721	*	+T	ENSBTAT00000056121, ENSBTAG00000037634	INS	FRAME_SHIFT
chr3	54604984	*	-C	ENSBTAT00000056121, ENSBTAG00000037634	DEL	FRAME_SHIFT
chr3	54678314	*	+A	ENSBTAT00000006940, A6QPV3_BOVIN	INS	FRAME_SHIFT
chr3	54804686	*	+T	ENSBTAT00000033527, ENSBTAG00000024272	INS	FRAME_SHIFT
chr3	54946823	*	-C	ENSBTAT00000019081, ENSBTAG00000002416	DEL	FRAME_SHIFT
chr3	61240623	*	-AG	ENSBTAT00000044005, ENSBTAG00000031088	DEL	FRAME_SHIFT
chr3	66755616	*	-AAATTCTCGAAGGG	ENSBTAT00000043998, ENSBTAG00000031082	DEL	FRAME_SHIFT
chr3	66755632	*	-C	ENSBTAT00000043998, ENSBTAG00000031082	DEL	FRAME_SHIFT
chr3	66975005	*	+A	ENSBTAT00000011751, FUBP1	INS	FRAME_SHIFT
chr3	66975086	*	+T	ENSBTAT00000011751, FUBP1	INS	FRAME_SHIFT
chr3	66975094	*	+T	ENSBTAT00000011751, FUBP1	INS	FRAME_SHIFT
chr3	75083168	*	-CA	ENSBTAT00000063885, B0JYP8_BOVIN	DEL	FRAME_SHIFT
chr3	75083170	*	+CA	ENSBTAT00000063885, B0JYP8_BOVIN	INS	FRAME_SHIFT
chr3	77108568	*	+A	ENSBTAT00000040383, DEPDC1	INS	FRAME_SHIFT
chr3	83665394	*	-C	ENSBTAT00000027254, USP1	DEL	FRAME_SHIFT
chr3	83946078	*	-AC	ENSBTAT00000063864, ENSBTAG00000045912	DEL	FRAME_SHIFT
chr3	86420636	*	-CCTC	ENSBTAT00000056737, ENSBTAG00000038085	DEL	FRAME_SHIFT
chr3	86420636	*	-CCTC	ENSBTAT00000051914, ENSBTAG00000038085	DEL	FRAME_SHIFT
chr3	86609741	*	+C	ENSBTAT00000000323, E1BFL1_BOVIN	INS	FRAME_SHIFT
chr3	86637505	*	+CA	ENSBTAT00000000323, E1BFL1_BOVIN	INS	FRAME_SHIFT
chr3	86637506	*	-GG	ENSBTAT00000000323, E1BFL1_BOVIN	DEL	FRAME_SHIFT
chr3	92411930	*	+G	ENSBTAT00000014192, SSBP3	INS	FRAME_SHIFT
chr3	92411935	*	-TGAA	ENSBTAT00000014192, SSBP3	DEL	FRAME_SHIFT
chr3	98705030	*	+T	ENSBTAT00000064734, ENSBTAG00000030553	INS	FRAME_SHIFT
chr3	99428644	*	-T	ENSBTAT00000063136, FOXD2	DEL	FRAME_SHIFT
chr3	99428648	*	-A	ENSBTAT00000063136, FOXD2	DEL	FRAME_SHIFT
chr3	99428691	*	+G	ENSBTAT00000063136, FOXD2	INS	FRAME_SHIFT
chr3	99925977	*	+TC	ENSBTAT00000000280, CYP4A22	INS	FRAME_SHIFT
chr3	99925978	*	+CC	ENSBTAT00000000280, CYP4A22	INS	FRAME_SHIFT
chr3	99926045	*	+C	ENSBTAT00000017936, CYP4A22	INS	FRAME_SHIFT
chr3	99926045	*	+C	ENSBTAT00000000280, CYP4A22	INS	FRAME_SHIFT
chr3	101176184	*	-G	ENSBTAT00000043074, CCDC163P	DEL	FRAME_SHIFT
chr3	101329731	*	+GG	ENSBTAT00000014928, MUTYH	INS	FRAME_SHIFT
chr3	101329733	*	-TTTA	ENSBTAT00000014928, MUTYH	DEL	FRAME_SHIFT
chr3	101329739	*	+CA	ENSBTAT00000014928, MUTYH	INS	FRAME_SHIFT
chr3	102575917	*	+G	ENSBTAT00000006784, ENSBTAG00000005143	INS	FRAME_SHIFT
chr3	103159533	*	-G	ENSBTAT00000042908, HYI	DEL	FRAME_SHIFT
chr3	103500363	*	-AA	ENSBTAT00000005245, ENSBTAG00000030386	DEL	FRAME_SHIFT
chr3	103500369	*	+GT	ENSBTAT00000005245, ENSBTAG00000030386	INS	FRAME_SHIFT
chr3	105414754	*	-T	ENSBTAT00000033274, FOXO6	DEL	FRAME_SHIFT
chr3	112891449	*	-C	ENSBTAT00000007609, CSMD2	DEL	FRAME_SHIFT
chr3	117591518	*	-GAGGAAAGAA	ENSBTAT00000000837, MLPH	DEL	FRAME_SHIFT
chr3	117884058	*	+C	ENSBTAT00000014122, RBM44	INS	FRAME_SHIFT
chr3	119208163	*	+GTCCTCCAGGTGT	ENSBTAT00000063251, ENSBTAG00000045515	INS	FRAME_SHIFT
chr3	119208178	*	+CCTCCAGGGGCGC	ENSBTAT00000063251, ENSBTAG00000045515	INS	FRAME_SHIFT
chr3	119208332	*	+TCCTCCAGGTGCG	ENSBTAT00000063251, ENSBTAG00000045515	INS	FRAME_SHIFT
chr3	119709071	*	+T	ENSBTAT00000063408, ENSBTAG00000045833	INS	FRAME_SHIFT
chr3	120005534	*	+CA	ENSBTAT00000056882, ENSBTAG00000040217	INS	FRAME_SHIFT
chr3	120005536	*	-TT	ENSBTAT00000056882, ENSBTAG00000040217	DEL	FRAME_SHIFT
chr3	120908813	*	-C	ENSBTAT00000005656, HDLBP	DEL	FRAME_SHIFT
chr4	5369768	*	-AA	ENSBTAT00000001965, ENSBTAG00000001502	DEL	FRAME_SHIFT
chr4	7096965	*	-CTGCTCAG	ENSBTAT00000034269, ABCA13	DEL	FRAME_SHIFT
chr4	7096965	*	-CTGCTCAG	ENSBTAT00000061018, ABCA13	DEL	FRAME_SHIFT
chr4	7640796	*	+A	ENSBTAT00000010721, SUN3	INS	FRAME_SHIFT
chr4	9534942	*	-T	ENSBTAT00000061475, ANKIB1	DEL	FRAME_SHIFT
chr4	10303025	*	+ATATGCTTAT	ENSBTAT00000061545, SAMD9	INS	FRAME_SHIFT
chr4	10306360	*	+CG	ENSBTAT00000061545, SAMD9	INS	FRAME_SHIFT
chr4	10306362	*	+T	ENSBTAT00000061545, SAMD9	INS	FRAME_SHIFT
chr4	10306367	*	-C	ENSBTAT00000061545, SAMD9	DEL	FRAME_SHIFT
chr4	10306371	*	-TC	ENSBTAT00000061545, SAMD9	DEL	FRAME_SHIFT
chr4	13589212	*	-G	ENSBTAT00000050149, ENSBTAG00000035660	DEL	FRAME_SHIFT
chr4	13589445	*	-G	ENSBTAT00000050149, ENSBTAG00000035660	DEL	FRAME_SHIFT
chr4	26540792	*	-CCGTACTTTGTGAATC	ENSBTAT00000048167, F1MBV2_BOVIN	DEL	FRAME_SHIFT
chr4	29596475	*	-GCCCCCCGACACGCCAGGGGCCTGGAACACCGAGTAGTCGTTTGCGAAGGGAGAGCTCGAGGCG	ENSBTAT00000003368, SP8	DEL	FRAME_SHIFT
chr4	32577542	*	-GCCGATGCTGCAGTCAAACAGAATGG	ENSBTAT00000047541, ENSBTAG00000015666	DEL	FRAME_SHIFT
chr4	32617882	*	+A	ENSBTAT00000047541, ENSBTAG00000015666	INS	FRAME_SHIFT
chr4	32617973	*	-AT	ENSBTAT00000047541, ENSBTAG00000015666	DEL	FRAME_SHIFT
chr4	32623242	*	-TTTG	ENSBTAT00000047541, ENSBTAG00000015666	DEL	FRAME_SHIFT
chr4	32623282	*	-AAAAC	ENSBTAT00000047541, ENSBTAG00000015666	DEL	FRAME_SHIFT
chr4	32623286	*	-C	ENSBTAT00000047541, ENSBTAG00000015666	DEL	FRAME_SHIFT
chr4	32623290	*	-AC	ENSBTAT00000047541, ENSBTAG00000015666	DEL	FRAME_SHIFT
chr4	32646474	*	-TTTT	ENSBTAT00000047541, ENSBTAG00000015666	DEL	FRAME_SHIFT
chr4	32646478	*	+T	ENSBTAT00000047541, ENSBTAG00000015666	INS	FRAME_SHIFT
chr4	32646477	*	-T	ENSBTAT00000047541, ENSBTAG00000015666	DEL	FRAME_SHIFT
chr4	37834282	*	-AG	ENSBTAT00000033801, PCLO	DEL	FRAME_SHIFT
chr4	40542063	*	-TAAC	ENSBTAT00000018902, CD36	DEL	FRAME_SHIFT
chr4	40802131	*	+T	ENSBTAT00000011395, GNAT3	INS	FRAME_SHIFT
chr4	43384459	*	-G	ENSBTAT00000028781, E1BED6_BOVIN	DEL	FRAME_SHIFT
chr4	49389000	*	-T	ENSBTAT00000047111, LAMB4	DEL	FRAME_SHIFT
chr4	49452997	*	+TG	ENSBTAT00000047111, LAMB4	INS	FRAME_SHIFT
chr4	49452997	*	+TG	ENSBTAT00000047110, LAMB4	INS	FRAME_SHIFT
chr4	49452998	*	-CA	ENSBTAT00000047111, LAMB4	DEL	FRAME_SHIFT
chr4	49452998	*	-CA	ENSBTAT00000047110, LAMB4	DEL	FRAME_SHIFT
chr4	49469330	*	+T	ENSBTAT00000047111, LAMB4	INS	FRAME_SHIFT
chr4	49469330	*	+T	ENSBTAT00000047110, LAMB4	INS	FRAME_SHIFT
chr4	51936210	*	-G	ENSBTAT00000008102, Q9BE46_BOVIN	DEL	FRAME_SHIFT
chr4	54903904	*	+A	ENSBTAT00000008851, PPP1R3A	INS	FRAME_SHIFT
chr4	54904215	*	+A	ENSBTAT00000008851, PPP1R3A	INS	FRAME_SHIFT
chr4	56547781	*	+A	ENSBTAT00000033734, ENSBTAG00000024361	INS	FRAME_SHIFT
chr4	56547781	*	+AA	ENSBTAT00000033734, ENSBTAG00000024361	INS	FRAME_SHIFT
chr4	60018364	*	+A	ENSBTAT00000064361, ENSBTAG00000046491	INS	FRAME_SHIFT
chr4	60018450	*	+GAGAGAAGTG	ENSBTAT00000064361, ENSBTAG00000046491	INS	FRAME_SHIFT
chr4	60018451	*	+CCCTA	ENSBTAT00000064361, ENSBTAG00000046491	INS	FRAME_SHIFT
chr4	60019082	*	-C	ENSBTAT00000064361, ENSBTAG00000046491	DEL	FRAME_SHIFT
chr4	69332709	*	-A	ENSBTAT00000055090, A7Z086_BOVIN	DEL	FRAME_SHIFT
chr4	71515599	*	-AG	ENSBTAT00000065471, ENSBTAG00000046586	DEL	FRAME_SHIFT
chr4	72736597	*	+A	ENSBTAT00000009397, ENSBTAG00000007136	INS	FRAME_SHIFT
chr4	72836856	*	-C	ENSBTAT00000030838, STEAP4	DEL	FRAME_SHIFT
chr4	73610697	*	-G	ENSBTAT00000020986, ENSBTAG00000015800	DEL	FRAME_SHIFT
chr4	73611031	*	-A	ENSBTAT00000020986, ENSBTAG00000015800	DEL	FRAME_SHIFT
chr4	83316194	*	-TCTA	ENSBTAT00000052995, ENSBTAG00000000144	DEL	FRAME_SHIFT
chr4	83316224	*	+GA	ENSBTAT00000052995, ENSBTAG00000000144	INS	FRAME_SHIFT
chr4	83316223	*	-A	ENSBTAT00000052995, ENSBTAG00000000144	DEL	FRAME_SHIFT
chr4	83316228	*	-CG	ENSBTAT00000052995, ENSBTAG00000000144	DEL	FRAME_SHIFT
chr4	83316249	*	+T	ENSBTAT00000052995, ENSBTAG00000000144	INS	FRAME_SHIFT
chr4	83316260	*	+CC	ENSBTAT00000052995, ENSBTAG00000000144	INS	FRAME_SHIFT
chr4	83316263	*	-C	ENSBTAT00000052995, ENSBTAG00000000144	DEL	FRAME_SHIFT
chr4	83316266	*	-T	ENSBTAT00000052995, ENSBTAG00000000144	DEL	FRAME_SHIFT
chr4	83451352	*	-G	ENSBTAT00000056695, ENSBTAG00000002859	DEL	FRAME_SHIFT
chr4	83451392	*	-GTGATTCT	ENSBTAT00000056695, ENSBTAG00000002859	DEL	FRAME_SHIFT
chr4	87360128	*	+AT	ENSBTAT00000016090, AASS	INS	FRAME_SHIFT
chr4	92643814	*	+AT	ENSBTAT00000045264, F1MYE7_BOVIN	INS	FRAME_SHIFT
chr4	96039030	*	+GA	ENSBTAT00000013799, PODXL	INS	FRAME_SHIFT
chr4	96039031	*	-TT	ENSBTAT00000013799, PODXL	DEL	FRAME_SHIFT
chr4	104304777	*	-AACGCCG	ENSBTAT00000026934, F1N133_BOVIN	DEL	FRAME_SHIFT
chr4	105888036	*	+T	ENSBTAT00000024537, Q2ABC3_BOVIN	INS	FRAME_SHIFT
chr4	106151583	*	-GT	ENSBTAT00000065670, MGAM	DEL	FRAME_SHIFT
chr4	106151587	*	+AA	ENSBTAT00000065670, MGAM	INS	FRAME_SHIFT
chr4	106460053	*	-C	ENSBTAT00000031673, Q32L73_BOVIN	DEL	FRAME_SHIFT
chr4	106460169	*	-A	ENSBTAT00000031673, Q32L73_BOVIN	DEL	FRAME_SHIFT
chr4	106465232	*	-GC	ENSBTAT00000017687, Q32L73_BOVIN	DEL	FRAME_SHIFT
chr4	106465232	*	-GC	ENSBTAT00000023763, Q32L73_BOVIN	DEL	FRAME_SHIFT
chr4	106465235	*	+TG	ENSBTAT00000017687, Q32L73_BOVIN	INS	FRAME_SHIFT
chr4	106465235	*	+TG	ENSBTAT00000023763, Q32L73_BOVIN	INS	FRAME_SHIFT
chr4	106465255	*	-G	ENSBTAT00000017687, Q32L73_BOVIN	DEL	FRAME_SHIFT
chr4	106465255	*	-G	ENSBTAT00000023763, Q32L73_BOVIN	DEL	FRAME_SHIFT
chr4	106465505	*	-T	ENSBTAT00000017687, Q32L73_BOVIN	DEL	FRAME_SHIFT
chr4	106465505	*	-T	ENSBTAT00000023763, Q32L73_BOVIN	DEL	FRAME_SHIFT
chr4	106473179	*	+G	ENSBTAT00000065554, ENSBTAG00000046164	INS	FRAME_SHIFT
chr4	106481367	*	+T	ENSBTAT00000023762, ENSBTAG00000045978	INS	FRAME_SHIFT
chr4	106481374	*	-A	ENSBTAT00000023762, ENSBTAG00000045978	DEL	FRAME_SHIFT
chr4	106495787	*	-AG	ENSBTAT00000065452, ENSBTAG00000031232	DEL	FRAME_SHIFT
chr4	106495798	*	+TC	ENSBTAT00000065452, ENSBTAG00000031232	INS	FRAME_SHIFT
chr4	106527882	*	-G	ENSBTAT00000053546, ENSBTAG00000040388	DEL	FRAME_SHIFT
chr4	106536808	*	-CG	ENSBTAT00000055640, ENSBTAG00000038960	DEL	FRAME_SHIFT
chr4	106536811	*	+AA	ENSBTAT00000055640, ENSBTAG00000038960	INS	FRAME_SHIFT
chr4	106541693	*	-A	ENSBTAT00000052905, ENSBTAG00000038307	DEL	FRAME_SHIFT
chr4	106541784	*	-G	ENSBTAT00000052905, ENSBTAG00000038307	DEL	FRAME_SHIFT
chr4	106543722	*	+GG	ENSBTAT00000065195, ENSBTAG00000048189	INS	FRAME_SHIFT
chr4	106543724	*	-TT	ENSBTAT00000065195, ENSBTAG00000048189	DEL	FRAME_SHIFT
chr4	106626026	*	-GGAAAGGACT	ENSBTAT00000033472, ENSBTAG00000024242	DEL	FRAME_SHIFT
chr4	106639310	*	-AG	ENSBTAT00000053668, ENSBTAG00000038605	DEL	FRAME_SHIFT
chr4	106877929	*	-G	ENSBTAT00000049021, LOC509513	DEL	FRAME_SHIFT
chr4	106898395	*	+T	ENSBTAT00000065443, LOC509513	INS	FRAME_SHIFT
chr4	107660750	*	-G	ENSBTAT00000056572, E1BAN6_BOVIN	DEL	FRAME_SHIFT
chr4	108450019	*	-AT	ENSBTAT00000002373, ARHGEF5	DEL	FRAME_SHIFT
chr4	108450022	*	+CA	ENSBTAT00000002373, ARHGEF5	INS	FRAME_SHIFT
chr4	113085969	*	-TGTGACAGTT	ENSBTAT00000027249, ZNF282	DEL	FRAME_SHIFT
chr4	113085969	*	-TGTGACAGTT	ENSBTAT00000064183, ZNF282	DEL	FRAME_SHIFT
chr4	113145304	*	+AGGAATATTTC	ENSBTAT00000003175, ZNF783	INS	FRAME_SHIFT
chr4	113149552	*	-GG	ENSBTAT00000003175, ZNF783	DEL	FRAME_SHIFT
chr4	113438373	*	+CACCGCAGCCCTTG	ENSBTAT00000043975, ENSBTAG00000008542	INS	FRAME_SHIFT
chr4	113486896	*	-TA	ENSBTAT00000043975, ENSBTAG00000008542	DEL	FRAME_SHIFT
chr4	113486900	*	-A	ENSBTAT00000043975, ENSBTAG00000008542	DEL	FRAME_SHIFT
chr4	113486935	*	-C	ENSBTAT00000043975, ENSBTAG00000008542	DEL	FRAME_SHIFT
chr4	113486943	*	-A	ENSBTAT00000043975, ENSBTAG00000008542	DEL	FRAME_SHIFT
chr4	113678825	*	-CCATC	ENSBTAT00000019150, GIMAP8	DEL	FRAME_SHIFT
chr4	113696705	*	-CATGG	ENSBTAT00000065457, GIMAP8	DEL	FRAME_SHIFT
chr4	113696705	*	-CATGG	ENSBTAT00000019150, GIMAP8	DEL	FRAME_SHIFT
chr4	113696726	*	-T	ENSBTAT00000065457, GIMAP8	DEL	FRAME_SHIFT
chr4	113696726	*	-T	ENSBTAT00000019150, GIMAP8	DEL	FRAME_SHIFT
chr4	113696772	*	-G	ENSBTAT00000019150, GIMAP8	DEL	FRAME_SHIFT
chr4	113867793	*	+C	ENSBTAT00000034773, Q1RMI4_BOVIN	INS	FRAME_SHIFT
chr4	113867798	*	-C	ENSBTAT00000034773, Q1RMI4_BOVIN	DEL	FRAME_SHIFT
chr4	113868195	*	+T	ENSBTAT00000034773, Q1RMI4_BOVIN	INS	FRAME_SHIFT
chr4	114116261	*	+CGGAG	ENSBTAT00000055206, ENSBTAG00000037510	INS	FRAME_SHIFT
chr4	114116270	*	+CTGGCCA	ENSBTAT00000055206, ENSBTAG00000037510	INS	FRAME_SHIFT
chr4	114394496	*	-A	ENSBTAT00000043813, ENSBTAG00000012031	DEL	FRAME_SHIFT
chr4	114733667	*	+AGTA	ENSBTAT00000008180, WDR86	INS	FRAME_SHIFT
chr4	114733668	*	-TTT	ENSBTAT00000008180, WDR86	DEL	FRAME_SHIFT
chr4	115267318	*	+C	ENSBTAT00000064511, GALNTL5	INS	FRAME_SHIFT
chr4	115267356	*	+C	ENSBTAT00000064511, GALNTL5	INS	FRAME_SHIFT
chr4	115267368	*	+T	ENSBTAT00000064511, GALNTL5	INS	FRAME_SHIFT
chr4	115395396	*	+C	ENSBTAT00000028347, ENSBTAG00000024199	INS	FRAME_SHIFT
chr4	117838851	*	+GC	ENSBTAT00000064484, PAXI1_BOVIN	INS	FRAME_SHIFT
chr4	118003001	*	-AAAAA	ENSBTAT00000028648, EN2	DEL	FRAME_SHIFT
chr4	118931439	*	+AGATCCAGACCCAGGTAGGCATGCCAGGCCGGCCCTGCAGCGGGCGGGGAGGGGACGGGGTGAGCAGGGC	ENSBTAT00000027101, RNF32	INS	FRAME_SHIFT
chr4	118931439	*	+AGATCCAGACCCAGGTAGGCATGCCAGGCCGGCCCTGCAGCGGGCGGGGAGGGGACAGGGTGAGCAGGGC	ENSBTAT00000027101, RNF32	INS	FRAME_SHIFT
chr4	118977753	*	+A	ENSBTAT00000043570, LMBR1	INS	FRAME_SHIFT
chr4	119288992	*	-G	ENSBTAT00000010553, UBE3C	DEL	FRAME_SHIFT
chr4	120306121	*	-T	ENSBTAT00000043608, A6QP60_BOVIN	DEL	FRAME_SHIFT
chr4	120306163	*	+C	ENSBTAT00000043608, A6QP60_BOVIN	INS	FRAME_SHIFT
chr4	120306446	*	+CCGCCCGACCCAC	ENSBTAT00000043608, A6QP60_BOVIN	INS	FRAME_SHIFT
chr5	4771389	*	-AT	ENSBTAT00000049807, CAPS2	DEL	FRAME_SHIFT
chr5	4922446	*	-GGAGGAGGTAGAGGAGGGGGAGGT	ENSBTAT00000025642, GLIPR1L2	DEL	FRAME_SHIFT
chr5	5813708	*	+A	ENSBTAT00000057299, BBS10	INS	FRAME_SHIFT
chr5	5813743	*	+A	ENSBTAT00000057299, BBS10	INS	FRAME_SHIFT
chr5	5813752	*	+A	ENSBTAT00000057299, BBS10	INS	FRAME_SHIFT
chr5	5813753	*	+T	ENSBTAT00000057299, BBS10	INS	FRAME_SHIFT
chr5	10074660	*	+A	ENSBTAT00000048152, PTPRQ	INS	FRAME_SHIFT
chr5	10074690	*	+T	ENSBTAT00000048152, PTPRQ	INS	FRAME_SHIFT
chr5	11972803	*	-A	ENSBTAT00000050784, TAP26_BOVIN	DEL	FRAME_SHIFT
chr5	18377559	*	-T	ENSBTAT00000065938, SCF_BOVIN	DEL	FRAME_SHIFT
chr5	22806706	*	-T	ENSBTAT00000047703, EEA1	DEL	FRAME_SHIFT
chr5	27281852	*	-G	ENSBTAT00000016839, K2C79_BOVIN	DEL	FRAME_SHIFT
chr5	27311210	*	-A	ENSBTAT00000065713, KRT3	DEL	FRAME_SHIFT
chr5	27311212	*	-CTGGTGGCTTTGGAGGA	ENSBTAT00000065713, KRT3	DEL	FRAME_SHIFT
chr5	27316222	*	-CGGCGGCGGCAGCGGC	ENSBTAT00000065713, KRT3	DEL	FRAME_SHIFT
chr5	27316231	*	-CAGCGGC	ENSBTAT00000065713, KRT3	DEL	FRAME_SHIFT
chr5	27316239	*	-TCAGCGGCTTCGGCGGCGGC	ENSBTAT00000065713, KRT3	DEL	FRAME_SHIFT
chr5	27316239	*	-TCGGCGGCGGCAGCGGCTTCGGCGGCGGC	ENSBTAT00000065713, KRT3	DEL	FRAME_SHIFT
chr5	27362515	*	+G	ENSBTAT00000040353, ENSBTAG00000027974	INS	FRAME_SHIFT
chr5	27807355	*	-CC	ENSBTAT00000046856, ENSBTAG00000013756	DEL	FRAME_SHIFT
chr5	27807359	*	-GTAC	ENSBTAT00000046856, ENSBTAG00000013756	DEL	FRAME_SHIFT
chr5	27807360	*	-TACA	ENSBTAT00000046856, ENSBTAG00000013756	DEL	FRAME_SHIFT
chr5	27825325	*	-T	ENSBTAT00000038457, F1N566_BOVIN	DEL	FRAME_SHIFT
chr5	28525427	*	-A	ENSBTAT00000032006, RPL36	DEL	FRAME_SHIFT
chr5	30053538	*	+AAGT	ENSBTAT00000016988, RACGAP1	INS	FRAME_SHIFT
chr5	30882685	*	-T	ENSBTAT00000061378, LMBR1L	DEL	FRAME_SHIFT
chr5	31606479	*	-TT	ENSBTAT00000022484, ENSBTAG00000016905	DEL	FRAME_SHIFT
chr5	32264007	*	+GCCCAGATCC	ENSBTAT00000046004, ENSBTAG00000032429	INS	FRAME_SHIFT
chr5	32363688	*	+G	ENSBTAT00000045915, SENP1	INS	FRAME_SHIFT
chr5	33113747	*	+CTGC	ENSBTAT00000053872, ENSBTAG00000038027	INS	FRAME_SHIFT
chr5	38386227	*	-A	ENSBTAT00000011340, PRICKLE1	DEL	FRAME_SHIFT
chr5	38674656	*	+A	ENSBTAT00000064422, YAF2	INS	FRAME_SHIFT
chr5	38674697	*	-T	ENSBTAT00000020002, YAF2	DEL	FRAME_SHIFT
chr5	38674697	*	-T	ENSBTAT00000064422, YAF2	DEL	FRAME_SHIFT
chr5	43134806	*	-AA	ENSBTAT00000020345, PTPRB	DEL	FRAME_SHIFT
chr5	43134808	*	+A	ENSBTAT00000020345, PTPRB	INS	FRAME_SHIFT
chr5	44047922	*	-C	ENSBTAT00000003810, BEST3	DEL	FRAME_SHIFT
chr5	44656506	*	-ATCCA	ENSBTAT00000017351, F1MC59_BOVIN	DEL	FRAME_SHIFT
chr5	45669687	*	+T	ENSBTAT00000026305, MDM1	INS	FRAME_SHIFT
chr5	46333905	*	+GG	ENSBTAT00000009545, DYRK2	INS	FRAME_SHIFT
chr5	46333906	*	-CT	ENSBTAT00000009545, DYRK2	DEL	FRAME_SHIFT
chr5	47901644	*	-G	ENSBTAT00000002597, CL031_BOVIN	DEL	FRAME_SHIFT
chr5	49740600	*	-TT	ENSBTAT00000017932, C12orf66	DEL	FRAME_SHIFT
chr5	56340196	*	+AGGGTGCCCT	ENSBTAT00000025401, E1B7M7_BOVIN	INS	FRAME_SHIFT
chr5	57968269	*	-GA	ENSBTAT00000038127, ENSBTAG00000021621	DEL	FRAME_SHIFT
chr5	57968273	*	+TG	ENSBTAT00000038127, ENSBTAG00000021621	INS	FRAME_SHIFT
chr5	58067824	*	-A	ENSBTAT00000028146, ENSBTAG00000021122	DEL	FRAME_SHIFT
chr5	58067978	*	+A	ENSBTAT00000028146, ENSBTAG00000021122	INS	FRAME_SHIFT
chr5	58752005	*	-AT	ENSBTAT00000056424, ENSBTAG00000026030	DEL	FRAME_SHIFT
chr5	58849628	*	-TT	ENSBTAT00000008284, OR6C76	DEL	FRAME_SHIFT
chr5	59061990	*	-T	ENSBTAT00000065594, E1BHV0_BOVIN	DEL	FRAME_SHIFT
chr5	59518505	*	-CCTTTCT	ENSBTAT00000044016, ENSBTAG00000031099	DEL	FRAME_SHIFT
chr5	59531805	*	-A	ENSBTAT00000044015, ENSBTAG00000046446	DEL	FRAME_SHIFT
chr5	59619295	*	-C	ENSBTAT00000008283, F1N6X1_BOVIN	DEL	FRAME_SHIFT
chr5	59672904	*	-GCTT	ENSBTAT00000065497, ENSBTAG00000047619	DEL	FRAME_SHIFT
chr5	59684280	*	-GCTT	ENSBTAT00000053953, F1MJ86_BOVIN	DEL	FRAME_SHIFT
chr5	59684280	*	-GCTT	ENSBTAT00000054033, F1MJ86_BOVIN	DEL	FRAME_SHIFT
chr5	60099505	*	-AATG	ENSBTAT00000054757, ENSBTAG00000046761	DEL	FRAME_SHIFT
chr5	61293191	*	+AAGGAATGCCTGTAATTCTGACTACAGTCAGAATT	ENSBTAT00000043356, C12orf55	INS	FRAME_SHIFT
chr5	64517252	*	-C	ENSBTAT00000018384, ACTR6	DEL	FRAME_SHIFT
chr5	66360361	*	-T	ENSBTAT00000017294, A1Z2Z3_BOVIN	DEL	FRAME_SHIFT
chr5	70597669	*	-TT	ENSBTAT00000013386, MTERFD3	DEL	FRAME_SHIFT
chr5	74227741	*	+G	ENSBTAT00000011742, APOL6	INS	FRAME_SHIFT
chr5	74228681	*	+G	ENSBTAT00000011742, APOL6	INS	FRAME_SHIFT
chr5	74228682	*	+GTGTGTGTGTG	ENSBTAT00000011742, APOL6	INS	FRAME_SHIFT
chr5	74228682	*	+GTGTGTGTGTGTGTGTGTGTGTGTG	ENSBTAT00000011742, APOL6	INS	FRAME_SHIFT
chr5	74228682	*	-TG	ENSBTAT00000011742, APOL6	DEL	FRAME_SHIFT
chr5	74686550	*	+TGCAC	ENSBTAT00000056456, LOC515697	INS	FRAME_SHIFT
chr5	74686553	*	-TAATT	ENSBTAT00000056456, LOC515697	DEL	FRAME_SHIFT
chr5	74686619	*	-AT	ENSBTAT00000056456, LOC515697	DEL	FRAME_SHIFT
chr5	74686622	*	+CC	ENSBTAT00000056456, LOC515697	INS	FRAME_SHIFT
chr5	74984936	*	+G	ENSBTAT00000044682, A6QQR3_BOVIN	INS	FRAME_SHIFT
chr5	80523194	*	+TCCCTCCCTCCTTCCT	ENSBTAT00000007060, OVCH1	INS	FRAME_SHIFT
chr5	80523194	*	+TCCCTCCCTCCTTCCT	ENSBTAT00000063566, OVCH1	INS	FRAME_SHIFT
chr5	80528194	*	+TATGGCATCTGGCATTTAGCATTTGAAAGAT	ENSBTAT00000007060, OVCH1	INS	FRAME_SHIFT
chr5	80528586	*	+A	ENSBTAT00000063566, OVCH1	INS	FRAME_SHIFT
chr5	80528586	*	+AA	ENSBTAT00000063566, OVCH1	INS	FRAME_SHIFT
chr5	80528587	*	+C	ENSBTAT00000063566, OVCH1	INS	FRAME_SHIFT
chr5	80528596	*	-GATAGGAAG	ENSBTAT00000063566, OVCH1	DEL	FRAME_SHIFT
chr5	80529583	*	-G	ENSBTAT00000063566, OVCH1	DEL	FRAME_SHIFT
chr5	80529585	*	+CA	ENSBTAT00000063566, OVCH1	INS	FRAME_SHIFT
chr5	99065732	*	-T	ENSBTAT00000043009, Q2ABB3_BOVIN	DEL	FRAME_SHIFT
chr5	99603735	*	+AACACCAGGGAGT	ENSBTAT00000006472, ENSBTAG00000046268	INS	FRAME_SHIFT
chr5	99755072	*	+TT	ENSBTAT00000055632, ENSBTAG00000033671	INS	FRAME_SHIFT
chr5	99755072	*	+T	ENSBTAT00000055632, ENSBTAG00000033671	INS	FRAME_SHIFT
chr5	99778944	*	+C	ENSBTAT00000018811, A3R3B5_BOVIN	INS	FRAME_SHIFT
chr5	99826146	*	+TT	ENSBTAT00000031648, A8E4Q0_BOVIN	INS	FRAME_SHIFT
chr5	99826146	*	+T	ENSBTAT00000031648, A8E4Q0_BOVIN	INS	FRAME_SHIFT
chr5	100048902	*	-A	ENSBTAT00000006469, KLRK1	DEL	FRAME_SHIFT
chr5	100479663	*	-TT	ENSBTAT00000064255, CLEC2A	DEL	FRAME_SHIFT
chr5	100479664	*	-T	ENSBTAT00000064255, CLEC2A	DEL	FRAME_SHIFT
chr5	100479665	*	+T	ENSBTAT00000064255, CLEC2A	INS	FRAME_SHIFT
chr5	100777828	*	+T	ENSBTAT00000052038, A6QQ73_BOVIN	INS	FRAME_SHIFT
chr5	101134978	*	+A	ENSBTAT00000037844, OVOS2	INS	FRAME_SHIFT
chr5	101232141	*	+A	ENSBTAT00000037743, ENSBTAG00000038461	INS	FRAME_SHIFT
chr5	101232141	*	+A	ENSBTAT00000055332, ENSBTAG00000038461	INS	FRAME_SHIFT
chr5	101240236	*	-A	ENSBTAT00000037743, ENSBTAG00000038461	DEL	FRAME_SHIFT
chr5	101240236	*	-A	ENSBTAT00000055332, ENSBTAG00000038461	DEL	FRAME_SHIFT
chr5	101260750	*	-T	ENSBTAT00000037743, ENSBTAG00000038461	DEL	FRAME_SHIFT
chr5	101260750	*	-T	ENSBTAT00000055332, ENSBTAG00000038461	DEL	FRAME_SHIFT
chr5	101522458	*	+TG	ENSBTAT00000037825, A2ML1	INS	FRAME_SHIFT
chr5	101522462	*	-AG	ENSBTAT00000037825, A2ML1	DEL	FRAME_SHIFT
chr5	102350542	*	-C	ENSBTAT00000057422, ENSBTAG00000039847	DEL	FRAME_SHIFT
chr5	102350542	*	-C	ENSBTAT00000028129, ENSBTAG00000039847	DEL	FRAME_SHIFT
chr5	102400789	*	+C	ENSBTAT00000055624, ENSBTAG00000039817	INS	FRAME_SHIFT
chr5	102507479	*	-G	ENSBTAT00000065821, ENSBTAG00000039380	DEL	FRAME_SHIFT
chr5	102901187	*	+CTGTTCAGGTCAT	ENSBTAT00000052602, ENSBTAG00000048175	INS	FRAME_SHIFT
chr5	102901439	*	-C	ENSBTAT00000052602, ENSBTAG00000048175	DEL	FRAME_SHIFT
chr5	102960721	*	+G	ENSBTAT00000052854, ENSBTAG00000024318	INS	FRAME_SHIFT
chr5	102960721	*	+G	ENSBTAT00000051899, ENSBTAG00000024318	INS	FRAME_SHIFT
chr5	102973450	*	+G	ENSBTAT00000056251, ENSBTAG00000030371	INS	FRAME_SHIFT
chr5	102974126	*	-CACCA	ENSBTAT00000056251, ENSBTAG00000030371	DEL	FRAME_SHIFT
chr5	102974809	*	-GAGA	ENSBTAT00000056251, ENSBTAG00000030371	DEL	FRAME_SHIFT
chr5	102974815	*	-TAGACTT	ENSBTAT00000056251, ENSBTAG00000030371	DEL	FRAME_SHIFT
chr5	103045262	*	-G	ENSBTAT00000052627, ENSBTAG00000045768	DEL	FRAME_SHIFT
chr5	103279476	*	+TC	ENSBTAT00000055707, ENSBTAG00000039256	INS	FRAME_SHIFT
chr5	103287740	*	+G	ENSBTAT00000055707, ENSBTAG00000039256	INS	FRAME_SHIFT
chr5	103288167	*	+A	ENSBTAT00000055707, ENSBTAG00000039256	INS	FRAME_SHIFT
chr5	103613471	*	-T	ENSBTAT00000010685, RET5_BOVIN	DEL	FRAME_SHIFT
chr5	103979538	*	-GGACAGGGCA	ENSBTAT00000037738, LEPREL2	DEL	FRAME_SHIFT
chr5	103988361	*	+G	ENSBTAT00000004678, Q0VD40_BOVIN	INS	FRAME_SHIFT
chr5	104142012	*	+GGCCC	ENSBTAT00000022702, A9X431_BOVIN	INS	FRAME_SHIFT
chr5	104142013	*	+G	ENSBTAT00000022702, A9X431_BOVIN	INS	FRAME_SHIFT
chr5	107397133	*	+A	ENSBTAT00000021101, FOXM1	INS	FRAME_SHIFT
chr5	107397321	*	+G	ENSBTAT00000021101, FOXM1	INS	FRAME_SHIFT
chr5	107486043	*	-AGG	ENSBTAT00000009329, DDX11	DEL	FRAME_SHIFT
chr5	107599348	*	+CCCGC	ENSBTAT00000025372, IQSEC3	INS	FRAME_SHIFT
chr5	107749756	*	+T	ENSBTAT00000026400, ENSBTAG00000023274	INS	FRAME_SHIFT
chr5	108079939	*	-G	ENSBTAT00000006875, WNK1	DEL	FRAME_SHIFT
chr5	108079941	*	-CGCCG	ENSBTAT00000006875, WNK1	DEL	FRAME_SHIFT
chr5	108079945	*	-G	ENSBTAT00000006875, WNK1	DEL	FRAME_SHIFT
chr5	108079947	*	-CG	ENSBTAT00000006875, WNK1	DEL	FRAME_SHIFT
chr5	111578409	*	-AT	ENSBTAT00000065257, CACNA1I	DEL	FRAME_SHIFT
chr5	111601471	*	+GAGT	ENSBTAT00000063975, CACNA1I	INS	FRAME_SHIFT
chr5	111601471	*	+GAGT	ENSBTAT00000066280, CACNA1I	INS	FRAME_SHIFT
chr5	111601471	*	+GAGT	ENSBTAT00000065257, CACNA1I	INS	FRAME_SHIFT
chr5	111898300	*	-C	ENSBTAT00000018933, FAM83F	DEL	FRAME_SHIFT
chr5	113285319	*	+TT	ENSBTAT00000028212, MEI1	INS	FRAME_SHIFT
chr5	113285319	*	+T	ENSBTAT00000028212, MEI1	INS	FRAME_SHIFT
chr5	113841865	*	+G	ENSBTAT00000065960, ENSBTAG00000046721	INS	FRAME_SHIFT
chr5	113842031	*	-G	ENSBTAT00000065960, ENSBTAG00000046721	DEL	FRAME_SHIFT
chr5	115056186	*	+G	ENSBTAT00000066219, ENSBTAG00000045746	INS	FRAME_SHIFT
chr5	115067397	*	-A	ENSBTAT00000062982, PNPLA5	DEL	FRAME_SHIFT
chr5	115067397	*	-A	ENSBTAT00000008237, PNPLA5	DEL	FRAME_SHIFT
chr5	116556668	*	+A	ENSBTAT00000004671, RIBC2_BOVIN	INS	FRAME_SHIFT
chr5	117711234	*	-A	ENSBTAT00000010610, PKDREJ	DEL	FRAME_SHIFT
chr5	117711234	*	-A	ENSBTAT00000062977, PKDREJ	DEL	FRAME_SHIFT
chr5	117711240	*	+TTTTT	ENSBTAT00000010610, PKDREJ	INS	FRAME_SHIFT
chr5	117711240	*	+TTTTT	ENSBTAT00000062977, PKDREJ	INS	FRAME_SHIFT
chr5	117711245	*	-C	ENSBTAT00000010610, PKDREJ	DEL	FRAME_SHIFT
chr5	117711245	*	-C	ENSBTAT00000062977, PKDREJ	DEL	FRAME_SHIFT
chr5	119677170	*	-CGCAGAAGTGTTTTCCC	ENSBTAT00000037486, ENSBTAG00000026385	DEL	FRAME_SHIFT
chr5	119677190	*	-AAAAAGTGGTCGCGGTGCTTGAAGAAGTGGTAGTCGGTTGGCG	ENSBTAT00000037486, ENSBTAG00000026385	DEL	FRAME_SHIFT
chr5	119677324	*	+CT	ENSBTAT00000037486, ENSBTAG00000026385	INS	FRAME_SHIFT
chr5	119678047	*	+C	ENSBTAT00000037486, ENSBTAG00000026385	INS	FRAME_SHIFT
chr5	119971495	*	+A	ENSBTAT00000028448, SBF1	INS	FRAME_SHIFT
chr5	119984861	*	+GT	ENSBTAT00000028448, SBF1	INS	FRAME_SHIFT
chr5	119984862	*	-AT	ENSBTAT00000028448, SBF1	DEL	FRAME_SHIFT
chr5	119984935	*	-T	ENSBTAT00000028448, SBF1	DEL	FRAME_SHIFT
chr5	120020019	*	-TTTTT	ENSBTAT00000052338, LMF2	DEL	FRAME_SHIFT
chr5	120020024	*	+AGCAG	ENSBTAT00000052338, LMF2	INS	FRAME_SHIFT
chr5	120131276	*	+GT	ENSBTAT00000021360, MAPK8IP2	INS	FRAME_SHIFT
chr5	120858340	*	-C	ENSBTAT00000065149, BRD1	DEL	FRAME_SHIFT
chr5	120858362	*	+C	ENSBTAT00000065149, BRD1	INS	FRAME_SHIFT
chr5	120858366	*	+T	ENSBTAT00000065149, BRD1	INS	FRAME_SHIFT
chr5	120858399	*	-C	ENSBTAT00000065149, BRD1	DEL	FRAME_SHIFT
chr5	120858400	*	-G	ENSBTAT00000065149, BRD1	DEL	FRAME_SHIFT
chr6	13392542	*	+TGTGTGTGTG	ENSBTAT00000003097, ANK2	INS	FRAME_SHIFT
chr6	13392542	*	+TGTGTGTG	ENSBTAT00000003097, ANK2	INS	FRAME_SHIFT
chr6	13412063	*	+G	ENSBTAT00000063504, ANK2	INS	FRAME_SHIFT
chr6	14292198	*	-T	ENSBTAT00000013457, ALPK1	DEL	FRAME_SHIFT
chr6	16982631	*	+AGGCA	ENSBTAT00000048781, SEC24B	INS	FRAME_SHIFT
chr6	16982634	*	+TACACTA	ENSBTAT00000048781, SEC24B	INS	FRAME_SHIFT
chr6	20763424	*	-A	ENSBTAT00000063870, ENSBTAG00000008797	DEL	FRAME_SHIFT
chr6	20763477	*	-TTGGT	ENSBTAT00000063870, ENSBTAG00000008797	DEL	FRAME_SHIFT
chr6	26691638	*	-CACCAAGA	ENSBTAT00000024022, ENSBTAG00000034514	DEL	FRAME_SHIFT
chr6	37728436	*	-CGGGACGCGGGGGGT	ENSBTAT00000052811, A6QP00_BOVIN	DEL	FRAME_SHIFT
chr6	38844606	*	-T	ENSBTAT00000064559, LCORL	DEL	FRAME_SHIFT
chr6	43784579	*	-G	ENSBTAT00000027139, ENSBTAG00000020363	DEL	FRAME_SHIFT
chr6	43800779	*	-GGGTTTCCCCA	ENSBTAT00000027139, ENSBTAG00000020363	DEL	FRAME_SHIFT
chr6	62918763	*	+T	ENSBTAT00000014818, ATP8A1	INS	FRAME_SHIFT
chr6	67068221	*	+ACTTAAC	ENSBTAT00000053055, ENSBTAG00000039213	INS	FRAME_SHIFT
chr6	67935542	*	-T	ENSBTAT00000002847, F1N2B7_BOVIN	DEL	FRAME_SHIFT
chr6	67935543	*	+T	ENSBTAT00000002847, F1N2B7_BOVIN	INS	FRAME_SHIFT
chr6	85646132	*	+CT	ENSBTAT00000054325, TMPRSS11E	INS	FRAME_SHIFT
chr6	86054796	*	-A	ENSBTAT00000025005, E1BJK3_BOVIN	DEL	FRAME_SHIFT
chr6	88030131	*	+A	ENSBTAT00000021671, MOB1B	INS	FRAME_SHIFT
chr6	90400830	*	+AAGG	ENSBTAT00000015836, RASSF6	INS	FRAME_SHIFT
chr6	90996767	*	-A	ENSBTAT00000005295, EPGN	DEL	FRAME_SHIFT
chr6	90996766	*	-AA	ENSBTAT00000005295, EPGN	DEL	FRAME_SHIFT
chr6	92879117	*	+C	ENSBTAT00000014549, A6QQP4_BOVIN	INS	FRAME_SHIFT
chr6	93866723	*	-A	ENSBTAT00000065329, ENSBTAG00000048196	DEL	FRAME_SHIFT
chr6	94711665	*	-T	ENSBTAT00000060947, FRAS1	DEL	FRAME_SHIFT
chr6	94756467	*	+G	ENSBTAT00000060947, FRAS1	INS	FRAME_SHIFT
chr6	94973423	*	+A	ENSBTAT00000060947, FRAS1	INS	FRAME_SHIFT
chr6	101448601	*	+A	ENSBTAT00000017949, WDFY3	INS	FRAME_SHIFT
chr6	101448610	*	+G	ENSBTAT00000017949, WDFY3	INS	FRAME_SHIFT
chr6	101448610	*	+G	ENSBTAT00000061443, WDFY3	INS	FRAME_SHIFT
chr6	104348557	*	-AGAAGTCCT	ENSBTAT00000039467, ENSBTAG00000017829	DEL	FRAME_SHIFT
chr6	104444917	*	-A	ENSBTAT00000008532, ENSBTAG00000006508	DEL	FRAME_SHIFT
chr6	104447707	*	-GCAGATCCTCA	ENSBTAT00000008532, ENSBTAG00000006508	DEL	FRAME_SHIFT
chr6	107219036	*	-T	ENSBTAT00000000081, LRPAP1	DEL	FRAME_SHIFT
chr6	108858616	*	+C	ENSBTAT00000044721, MFSD7	INS	FRAME_SHIFT
chr6	113330479	*	+A	ENSBTAT00000001160, ENSBTAG00000000872	INS	FRAME_SHIFT
chr6	113330479	*	+AA	ENSBTAT00000001160, ENSBTAG00000000872	INS	FRAME_SHIFT
chr6	119012633	*	-C	ENSBTAT00000016537, AFAP1	DEL	FRAME_SHIFT
chr6	119012633	*	+GTAG	ENSBTAT00000016537, AFAP1	INS	FRAME_SHIFT
chr6	119012634	*	+ACTGTGATGGACGGGAGAGGTGAGAGTAAGGGTACAAGGAAGTCCTTTAT	ENSBTAT00000016537, AFAP1	INS	FRAME_SHIFT
chr7	972172	*	-TTTCCATTGTA	ENSBTAT00000064097, ENSBTAG00000047695	DEL	FRAME_SHIFT
chr7	1414844	*	+T	ENSBTAT00000063603, MGAT4B	INS	FRAME_SHIFT
chr7	1414844	*	+T	ENSBTAT00000049734, MGAT4B	INS	FRAME_SHIFT
chr7	2485789	*	-C	ENSBTAT00000056532, A4IFU5_BOVIN	DEL	FRAME_SHIFT
chr7	4357306	*	-G	ENSBTAT00000006074, COMP	DEL	FRAME_SHIFT
chr7	4569705	*	-T	ENSBTAT00000021634, Q05B91_BOVIN	DEL	FRAME_SHIFT
chr7	4878037	*	+T	ENSBTAT00000000218, KIAA1683	INS	FRAME_SHIFT
chr7	4878163	*	+A	ENSBTAT00000000218, KIAA1683	INS	FRAME_SHIFT
chr7	5656574	*	+GC	ENSBTAT00000066038, ENSBTAG00000045588	INS	FRAME_SHIFT
chr7	5656579	*	+C	ENSBTAT00000066038, ENSBTAG00000045588	INS	FRAME_SHIFT
chr7	5656582	*	+GG	ENSBTAT00000066038, ENSBTAG00000045588	INS	FRAME_SHIFT
chr7	5656583	*	-TT	ENSBTAT00000066038, ENSBTAG00000045588	DEL	FRAME_SHIFT
chr7	5656877	*	-CCCTCTA	ENSBTAT00000066038, ENSBTAG00000045588	DEL	FRAME_SHIFT
chr7	5656889	*	+AG	ENSBTAT00000066038, ENSBTAG00000045588	INS	FRAME_SHIFT
chr7	5656890	*	-CC	ENSBTAT00000066038, ENSBTAG00000045588	DEL	FRAME_SHIFT
chr7	5656894	*	-CC	ENSBTAT00000066038, ENSBTAG00000045588	DEL	FRAME_SHIFT
chr7	5656900	*	-CTTCCCCGCG	ENSBTAT00000066038, ENSBTAG00000045588	DEL	FRAME_SHIFT
chr7	5656918	*	-GGGTGTGG	ENSBTAT00000066038, ENSBTAG00000045588	DEL	FRAME_SHIFT
chr7	5656930	*	-GACCGCGG	ENSBTAT00000066038, ENSBTAG00000045588	DEL	FRAME_SHIFT
chr7	5656942	*	+AC	ENSBTAT00000066038, ENSBTAG00000045588	INS	FRAME_SHIFT
chr7	5656944	*	+CT	ENSBTAT00000066038, ENSBTAG00000045588	INS	FRAME_SHIFT
chr7	5929225	*	-A	ENSBTAT00000047333, Q0II23_BOVIN	DEL	FRAME_SHIFT
chr7	6169122	*	+G	ENSBTAT00000012281, NWD1	INS	FRAME_SHIFT
chr7	8068603	*	-GA	ENSBTAT00000024940, ENSBTAG00000033092	DEL	FRAME_SHIFT
chr7	8068606	*	+TC	ENSBTAT00000024940, ENSBTAG00000033092	INS	FRAME_SHIFT
chr7	8160746	*	+AT	ENSBTAT00000066035, ENSBTAG00000047215	INS	FRAME_SHIFT
chr7	8160748	*	-AA	ENSBTAT00000066035, ENSBTAG00000047215	DEL	FRAME_SHIFT
chr7	8160903	*	-T	ENSBTAT00000066035, ENSBTAG00000047215	DEL	FRAME_SHIFT
chr7	8901954	*	+C	ENSBTAT00000003242, BRD4	INS	FRAME_SHIFT
chr7	9020585	*	-T	ENSBTAT00000020206, ILVBL_BOVIN	DEL	FRAME_SHIFT
chr7	9496332	*	-G	ENSBTAT00000065633, ENSBTAG00000047888	DEL	FRAME_SHIFT
chr7	9556265	*	+T	ENSBTAT00000037393, ENSBTAG00000034909	INS	FRAME_SHIFT
chr7	9556279	*	-AA	ENSBTAT00000037393, ENSBTAG00000034909	DEL	FRAME_SHIFT
chr7	9577004	*	-T	ENSBTAT00000057506, ENSBTAG00000048056	DEL	FRAME_SHIFT
chr7	9714726	*	+T	ENSBTAT00000063607, ENSBTAG00000046423	INS	FRAME_SHIFT
chr7	9714726	*	+T	ENSBTAT00000066139, ENSBTAG00000046423	INS	FRAME_SHIFT
chr7	9714957	*	-T	ENSBTAT00000063607, ENSBTAG00000046423	DEL	FRAME_SHIFT
chr7	9714957	*	-T	ENSBTAT00000066139, ENSBTAG00000046423	DEL	FRAME_SHIFT
chr7	10151554	*	-A	ENSBTAT00000023985, ENSBTAG00000024397	DEL	FRAME_SHIFT
chr7	10454784	*	-C	ENSBTAT00000066183, ENSBTAG00000047817	DEL	FRAME_SHIFT
chr7	10556664	*	-A	ENSBTAT00000049823, ENSBTAG00000046513	DEL	FRAME_SHIFT
chr7	10907616	*	-A	ENSBTAT00000057113, ENSBTAG00000046958	DEL	FRAME_SHIFT
chr7	10907616	*	-A	ENSBTAT00000009854, ENSBTAG00000046958	DEL	FRAME_SHIFT
chr7	10939513	*	-C	ENSBTAT00000064809, ENSBTAG00000047696	DEL	FRAME_SHIFT
chr7	11791621	*	-C	ENSBTAT00000004588, ENSBTAG00000003528	DEL	FRAME_SHIFT
chr7	12251753	*	+T	ENSBTAT00000003821, EMR3	INS	FRAME_SHIFT
chr7	12727878	*	+G	ENSBTAT00000022526, ENSBTAG00000016936	INS	FRAME_SHIFT
chr7	12768990	*	-C	ENSBTAT00000036249, F1MEV7_BOVIN	DEL	FRAME_SHIFT
chr7	12929362	*	-A	ENSBTAT00000017226, CC130_BOVIN	DEL	FRAME_SHIFT
chr7	12929362	*	-A	ENSBTAT00000003269, CC130_BOVIN	DEL	FRAME_SHIFT
chr7	13785907	*	-C	ENSBTAT00000046003, Q0P5B6_BOVIN	DEL	FRAME_SHIFT
chr7	13785976	*	-A	ENSBTAT00000046003, Q0P5B6_BOVIN	DEL	FRAME_SHIFT
chr7	13880056	*	-C	ENSBTAT00000003818, BEST2	DEL	FRAME_SHIFT
chr7	13880061	*	+G	ENSBTAT00000003818, BEST2	INS	FRAME_SHIFT
chr7	13880065	*	+GGTCG	ENSBTAT00000003818, BEST2	INS	FRAME_SHIFT
chr7	13880073	*	-CCGAC	ENSBTAT00000003818, BEST2	DEL	FRAME_SHIFT
chr7	13880081	*	+G	ENSBTAT00000003818, BEST2	INS	FRAME_SHIFT
chr7	14355253	*	+CC	ENSBTAT00000065546, MUC16	INS	FRAME_SHIFT
chr7	14355253	*	+CC	ENSBTAT00000052074, MUC16	INS	FRAME_SHIFT
chr7	14355254	*	-TG	ENSBTAT00000065546, MUC16	DEL	FRAME_SHIFT
chr7	14355254	*	-TG	ENSBTAT00000052074, MUC16	DEL	FRAME_SHIFT
chr7	14528074	*	-GTCACTG	ENSBTAT00000049901, F1MU49_BOVIN	DEL	FRAME_SHIFT
chr7	14672344	*	-A	ENSBTAT00000054111, ENSBTAG00000039130	DEL	FRAME_SHIFT
chr7	14895615	*	-TGTGTGTCTGGAGGTTCACTAGCATCTTGGGG	ENSBTAT00000053935, ENSBTAG00000039809	DEL	FRAME_SHIFT
chr7	14970447	*	+T	ENSBTAT00000052566, ENSBTAG00000040482	INS	FRAME_SHIFT
chr7	15655483	*	+C	ENSBTAT00000064833, ENSBTAG00000047377	INS	FRAME_SHIFT
chr7	16382270	*	+A	ENSBTAT00000018818, ILF3	INS	FRAME_SHIFT
chr7	16593509	*	+T	ENSBTAT00000065916, C7H19orf52	INS	FRAME_SHIFT
chr7	16708894	*	+TC	ENSBTAT00000025598, SMCA4_BOVIN	INS	FRAME_SHIFT
chr7	16708983	*	-G	ENSBTAT00000025598, SMCA4_BOVIN	DEL	FRAME_SHIFT
chr7	17164646	*	-TT	ENSBTAT00000053199, ENSBTAG00000040153	DEL	FRAME_SHIFT
chr7	17545396	*	+T	ENSBTAT00000065966, ENSBTAG00000040507	INS	FRAME_SHIFT
chr7	17545398	*	-C	ENSBTAT00000065966, ENSBTAG00000040507	DEL	FRAME_SHIFT
chr7	17693227	*	-G	ENSBTAT00000015097, XAB2	DEL	FRAME_SHIFT
chr7	17905892	*	-TTTTTCTT	ENSBTAT00000063190, CTXN1	DEL	FRAME_SHIFT
chr7	17905900	*	+AGCACCAG	ENSBTAT00000063190, CTXN1	INS	FRAME_SHIFT
chr7	19209394	*	+T	ENSBTAT00000065068, ENSBTAG00000046865	INS	FRAME_SHIFT
chr7	19259126	*	-GGGGCGGGGGGGGG	ENSBTAT00000027991, KHSRP	DEL	FRAME_SHIFT
chr7	20549084	*	-AGGCTCACTCGACCCCTTCTA	ENSBTAT00000026593, TICAM1	DEL	FRAME_SHIFT
chr7	20835439	*	+CAAGGGGGCTGTCCAAACTGGCATGGACACCACCAAGACTGTCTTGACTGGCACCAAAGATGCTGTCTCCTCTGGGCTCACTGGAGCCATGGGT	ENSBTAT00000020833, PLIN4	INS	FRAME_SHIFT
chr7	20837223	*	-G	ENSBTAT00000020833, PLIN4	DEL	FRAME_SHIFT
chr7	21048055	*	+GCTCAGCCGC	ENSBTAT00000019653, ANKRD24	INS	FRAME_SHIFT
chr7	23580101	*	+GAAT	ENSBTAT00000044192, ENSBTAG00000031205	INS	FRAME_SHIFT
chr7	26837931	*	+T	ENSBTAT00000020360, FBN2	INS	FRAME_SHIFT
chr7	28414846	*	-CCTCT	ENSBTAT00000052423, E1BCJ4_BOVIN	DEL	FRAME_SHIFT
chr7	28414851	*	+GA	ENSBTAT00000052423, E1BCJ4_BOVIN	INS	FRAME_SHIFT
chr7	28422336	*	+C	ENSBTAT00000052423, E1BCJ4_BOVIN	INS	FRAME_SHIFT
chr7	33135858	*	-G	ENSBTAT00000053358, SRFBP1	DEL	FRAME_SHIFT
chr7	40288853	*	+C	ENSBTAT00000061163, GRK6	INS	FRAME_SHIFT
chr7	41445152	*	-TG	ENSBTAT00000064254, ENSBTAG00000046424	DEL	FRAME_SHIFT
chr7	41445155	*	+AA	ENSBTAT00000064254, ENSBTAG00000046424	INS	FRAME_SHIFT
chr7	41463174	*	-T	ENSBTAT00000025129, ENSBTAG00000024713	DEL	FRAME_SHIFT
chr7	41825314	*	+T	ENSBTAT00000020877, Q3ZCI2_BOVIN	INS	FRAME_SHIFT
chr7	42296710	*	-TC	ENSBTAT00000053857, OR2G2	DEL	FRAME_SHIFT
chr7	42313379	*	-C	ENSBTAT00000040257, OR2G3	DEL	FRAME_SHIFT
chr7	42505986	*	+A	ENSBTAT00000066001, OR14I1	INS	FRAME_SHIFT
chr7	42533548	*	-TG	ENSBTAT00000052793, ENSBTAG00000001761	DEL	FRAME_SHIFT
chr7	42533551	*	+AT	ENSBTAT00000052793, ENSBTAG00000001761	INS	FRAME_SHIFT
chr7	42868876	*	-CTCTTCTATGGCA	ENSBTAT00000001689, ENSBTAG00000027241	DEL	FRAME_SHIFT
chr7	42891261	*	+G	ENSBTAT00000064471, ENSBTAG00000045733	INS	FRAME_SHIFT
chr7	43156608	*	-C	ENSBTAT00000030772, OR2L13	DEL	FRAME_SHIFT
chr7	43706212	*	-C	ENSBTAT00000056993, ENSBTAG00000047415	DEL	FRAME_SHIFT
chr7	43706319	*	-AA	ENSBTAT00000056993, ENSBTAG00000047415	DEL	FRAME_SHIFT
chr7	43706322	*	+TA	ENSBTAT00000056993, ENSBTAG00000047415	INS	FRAME_SHIFT
chr7	43706965	*	+TG	ENSBTAT00000056993, ENSBTAG00000047415	INS	FRAME_SHIFT
chr7	43852381	*	+TGCGT	ENSBTAT00000043422, MGC148293	INS	FRAME_SHIFT
chr7	43852382	*	+G	ENSBTAT00000043422, MGC148293	INS	FRAME_SHIFT
chr7	44175040	*	+A	ENSBTAT00000055168, ENSBTAG00000009273	INS	FRAME_SHIFT
chr7	45287816	*	+CC	ENSBTAT00000015459, STK11	INS	FRAME_SHIFT
chr7	45296622	*	-GT	ENSBTAT00000035381, C19orf26	DEL	FRAME_SHIFT
chr7	45296624	*	+G	ENSBTAT00000035381, C19orf26	INS	FRAME_SHIFT
chr7	52363944	*	-T	ENSBTAT00000002962, TM173_BOVIN	DEL	FRAME_SHIFT
chr7	52715146	*	-T	ENSBTAT00000063968, NRG2	DEL	FRAME_SHIFT
chr7	52715146	*	-T	ENSBTAT00000014144, NRG2	DEL	FRAME_SHIFT
chr7	52715146	*	-T	ENSBTAT00000065759, NRG2	DEL	FRAME_SHIFT
chr7	53294379	*	-A	ENSBTAT00000065025, ENSBTAG00000010871	DEL	FRAME_SHIFT
chr7	53510262	*	-G	ENSBTAT00000007159, Q0P584_BOVIN	DEL	FRAME_SHIFT
chr7	54001709	*	+TT	ENSBTAT00000022499, ENSBTAG00000007350	INS	FRAME_SHIFT
chr7	54003202	*	-G	ENSBTAT00000022499, ENSBTAG00000007350	DEL	FRAME_SHIFT
chr7	54373322	*	-G	ENSBTAT00000023082, DIAPH1	DEL	FRAME_SHIFT
chr7	55040783	*	+A	ENSBTAT00000064077, ENSBTAG00000045651	INS	FRAME_SHIFT
chr7	62974722	*	-CTCA	ENSBTAT00000020493, ARHGEF37	DEL	FRAME_SHIFT
chr7	62974728	*	-G	ENSBTAT00000020493, ARHGEF37	DEL	FRAME_SHIFT
chr7	62974732	*	-AGGA	ENSBTAT00000020493, ARHGEF37	DEL	FRAME_SHIFT
chr7	65649362	*	+A	ENSBTAT00000014782, NMUR2_BOVIN	INS	FRAME_SHIFT
chr7	70708885	*	-C	ENSBTAT00000064478, ENSBTAG00000036102	DEL	FRAME_SHIFT
chr7	73779754	*	-G	ENSBTAT00000013651, PWWP2A	DEL	FRAME_SHIFT
chr7	77295654	*	+T	ENSBTAT00000019652, Q8SPR5_BOVIN	INS	FRAME_SHIFT
chr7	77295654	*	+TT	ENSBTAT00000019652, Q8SPR5_BOVIN	INS	FRAME_SHIFT
chr7	92872699	*	+CCCACCAGAGGCC	ENSBTAT00000011370, ENSBTAG00000046227	INS	FRAME_SHIFT
chr7	97331340	*	-AAAA	ENSBTAT00000026877, ARSK_BOVIN	DEL	FRAME_SHIFT
chr7	97430927	*	+GGTAAAATTGTTCC	ENSBTAT00000061559, RHOBTB3	INS	FRAME_SHIFT
chr7	105425399	*	-C	ENSBTAT00000063427, ENSBTAG00000046867	DEL	FRAME_SHIFT
chr7	105425479	*	-A	ENSBTAT00000063427, ENSBTAG00000046867	DEL	FRAME_SHIFT
chr7	111491417	*	+T	ENSBTAT00000042616, MAN2A1	INS	FRAME_SHIFT
chr7	111491429	*	+A	ENSBTAT00000042616, MAN2A1	INS	FRAME_SHIFT
chr7	111494447	*	-TTTT	ENSBTAT00000042616, MAN2A1	DEL	FRAME_SHIFT
chr7	111494451	*	+CCAG	ENSBTAT00000042616, MAN2A1	INS	FRAME_SHIFT
chr8	7101177	*	-AT	ENSBTAT00000050255, ENSBTAG00000035768	DEL	FRAME_SHIFT
chr8	7101180	*	+AC	ENSBTAT00000050255, ENSBTAG00000035768	INS	FRAME_SHIFT
chr8	7101562	*	+T	ENSBTAT00000050255, ENSBTAG00000035768	INS	FRAME_SHIFT
chr8	7101564	*	+GG	ENSBTAT00000050255, ENSBTAG00000035768	INS	FRAME_SHIFT
chr8	7102104	*	-GA	ENSBTAT00000050255, ENSBTAG00000035768	DEL	FRAME_SHIFT
chr8	7102108	*	+TG	ENSBTAT00000050255, ENSBTAG00000035768	INS	FRAME_SHIFT
chr8	7145659	*	-GA	ENSBTAT00000049418, ENSBTAG00000008678	DEL	FRAME_SHIFT
chr8	7145663	*	+TG	ENSBTAT00000049418, ENSBTAG00000008678	INS	FRAME_SHIFT
chr8	7161164	*	-AAAAT	ENSBTAT00000053102, ENSBTAG00000039873	DEL	FRAME_SHIFT
chr8	7161169	*	+GGTGC	ENSBTAT00000053102, ENSBTAG00000039873	INS	FRAME_SHIFT
chr8	8256163	*	-CCCC	ENSBTAT00000063176, ENSBTAG00000048007	DEL	FRAME_SHIFT
chr8	8256167	*	+C	ENSBTAT00000063176, ENSBTAG00000048007	INS	FRAME_SHIFT
chr8	8256167	*	+TG	ENSBTAT00000063176, ENSBTAG00000048007	INS	FRAME_SHIFT
chr8	8401513	*	+A	ENSBTAT00000065564, SOX7	INS	FRAME_SHIFT
chr8	10624903	*	-AGT	ENSBTAT00000015047, NUGGC	DEL	FRAME_SHIFT
chr8	16750751	*	-TCCTGAGGGTT	ENSBTAT00000008998, E1BJ91_BOVIN	DEL	FRAME_SHIFT
chr8	20452473	*	+TC	ENSBTAT00000065940, ELAVL2	INS	FRAME_SHIFT
chr8	22700875	*	+CA	ENSBTAT00000065214, E1BBJ1_BOVIN	INS	FRAME_SHIFT
chr8	22700876	*	-GG	ENSBTAT00000065214, E1BBJ1_BOVIN	DEL	FRAME_SHIFT
chr8	23232254	*	+AT	ENSBTAT00000064512, ENSBTAG00000045674	INS	FRAME_SHIFT
chr8	38691669	*	+A	ENSBTAT00000014821, Q2NL03_BOVIN	INS	FRAME_SHIFT
chr8	42043363	*	+T	ENSBTAT00000023770, KCNV2	INS	FRAME_SHIFT
chr8	48658369	*	-AT	ENSBTAT00000015339, GDA	DEL	FRAME_SHIFT
chr8	49500439	*	-C	ENSBTAT00000065032, ENSBTAG00000047442	DEL	FRAME_SHIFT
chr8	49516730	*	+A	ENSBTAT00000065032, ENSBTAG00000047442	INS	FRAME_SHIFT
chr8	49630650	*	-A	ENSBTAT00000021256, F1N650_BOVIN	DEL	FRAME_SHIFT
chr8	51427473	*	-A	ENSBTAT00000026242, NMRK1	DEL	FRAME_SHIFT
chr8	51427474	*	+A	ENSBTAT00000026242, NMRK1	INS	FRAME_SHIFT
chr8	52656514	*	-T	ENSBTAT00000036658, PCSK5	DEL	FRAME_SHIFT
chr8	52656515	*	+TT	ENSBTAT00000036658, PCSK5	INS	FRAME_SHIFT
chr8	52656515	*	+T	ENSBTAT00000036658, PCSK5	INS	FRAME_SHIFT
chr8	53045998	*	+TCAATATTTTGGAAGACTTAATGAAAGAGCCTGAACACTTTGTTTATGGTGTGTAAGGTGCCAACTCATGCTTCAGGGCATCTTCTTCCAAGGGAGGGACAACACCATAGACAAAGTGTTCAGGCTCTTTCATTAAGTCTTCC	ENSBTAT00000017205, A7Z048_BOVIN	INS	FRAME_SHIFT
chr8	53196340	*	+T	ENSBTAT00000017205, A7Z048_BOVIN	INS	FRAME_SHIFT
chr8	59762304	*	+G	ENSBTAT00000061353, PIGO	INS	FRAME_SHIFT
chr8	62330510	*	-A	ENSBTAT00000053555, RG9MTD3	DEL	FRAME_SHIFT
chr8	66162642	*	+G	ENSBTAT00000063361, ENSBTAG00000047647	INS	FRAME_SHIFT
chr8	70807079	*	-T	ENSBTAT00000050448, ENSBTAG00000035958	DEL	FRAME_SHIFT
chr8	70807335	*	-T	ENSBTAT00000050448, ENSBTAG00000035958	DEL	FRAME_SHIFT
chr8	70895217	*	-G	ENSBTAT00000045250, RHOBTB2	DEL	FRAME_SHIFT
chr8	70942311	*	-AGCT	ENSBTAT00000063116, LOC782274	DEL	FRAME_SHIFT
chr8	70943152	*	+C	ENSBTAT00000065559, LOC782274	INS	FRAME_SHIFT
chr8	70943999	*	-GC	ENSBTAT00000065559, LOC782274	DEL	FRAME_SHIFT
chr8	70944010	*	+TATATATA	ENSBTAT00000065559, LOC782274	INS	FRAME_SHIFT
chr8	71176601	*	-AGCT	ENSBTAT00000064909, ENSBTAG00000048226	DEL	FRAME_SHIFT
chr8	71184933	*	-CTAA	ENSBTAT00000045246, ENSBTAG00000046431	DEL	FRAME_SHIFT
chr8	71422318	*	+G	ENSBTAT00000061167, F1N7A1_BOVIN	INS	FRAME_SHIFT
chr8	71698460	*	+C	ENSBTAT00000018610, NKX2-6	INS	FRAME_SHIFT
chr8	72266784	*	-GT	ENSBTAT00000057360, ENSBTAG00000047207	DEL	FRAME_SHIFT
chr8	72568235	*	-T	ENSBTAT00000056180, ADAM7	DEL	FRAME_SHIFT
chr8	73797647	*	-GGGCTGCAGTACATG	ENSBTAT00000003573, ENSBTAG00000002756	DEL	FRAME_SHIFT
chr8	76029983	*	-C	ENSBTAT00000020003, ENSBTAG00000015027	DEL	FRAME_SHIFT
chr8	76030457	*	-CAGT	ENSBTAT00000020003, ENSBTAG00000015027	DEL	FRAME_SHIFT
chr8	77199609	*	+T	ENSBTAT00000015661, ENSBTAG00000005495	INS	FRAME_SHIFT
chr8	77452044	*	+A	ENSBTAT00000053776, ENSBTAG00000039021	INS	FRAME_SHIFT
chr8	83244288	*	+T	ENSBTAT00000053619, ENSBTAG00000031517	INS	FRAME_SHIFT
chr8	83244288	*	+C	ENSBTAT00000053619, ENSBTAG00000031517	INS	FRAME_SHIFT
chr8	83251340	*	-T	ENSBTAT00000044671, ENSBTAG00000031517	DEL	FRAME_SHIFT
chr8	84748638	*	-G	ENSBTAT00000015397, CDC14B	DEL	FRAME_SHIFT
chr8	85375162	*	-C	ENSBTAT00000024770, ENSBTAG00000018613	DEL	FRAME_SHIFT
chr8	85984790	*	-GCGGGTGCGGGCGGCGCGG	ENSBTAT00000060961, A1A4J5_BOVIN	DEL	FRAME_SHIFT
chr8	85984790	*	-GCGGGTGCGGGCGGCGCGG	ENSBTAT00000065526, A1A4J5_BOVIN	DEL	FRAME_SHIFT
chr8	88000515	*	+A	ENSBTAT00000063867, A7YSY7_BOVIN	INS	FRAME_SHIFT
chr8	88648067	*	-G	ENSBTAT00000065666, ENSBTAG00000046969	DEL	FRAME_SHIFT
chr8	95908765	*	+C	ENSBTAT00000000168, ENSBTAG00000016173	INS	FRAME_SHIFT
chr8	99850273	*	-G	ENSBTAT00000001176, ENSBTAG00000000885	DEL	FRAME_SHIFT
chr8	101894897	*	+A	ENSBTAT00000003558, MUSK	INS	FRAME_SHIFT
chr8	101894897	*	+A	ENSBTAT00000065708, MUSK	INS	FRAME_SHIFT
chr8	101894916	*	+A	ENSBTAT00000003558, MUSK	INS	FRAME_SHIFT
chr8	104116633	*	-AGCTTGCCTCTATTTCTGAGGGCTCCCCTTCCCTTCTCTGTGCGTCATCCTGGGGAGTGGGACAGCCCTGAGGAGAC	ENSBTAT00000006746, FKBP15	DEL	FRAME_SHIFT
chr8	105157417	*	+A	ENSBTAT00000001200, Q148M4_BOVIN	INS	FRAME_SHIFT
chr8	105168202	*	+T	ENSBTAT00000001200, Q148M4_BOVIN	INS	FRAME_SHIFT
chr8	109803007	*	-T	ENSBTAT00000065674, ENSBTAG00000046729	DEL	FRAME_SHIFT
chr8	109803006	*	-TT	ENSBTAT00000065674, ENSBTAG00000046729	DEL	FRAME_SHIFT
chr9	9816089	*	-AA	ENSBTAT00000061569, FAM135A	DEL	FRAME_SHIFT
chr9	20144665	*	-TG	ENSBTAT00000065549, BCKDHB	DEL	FRAME_SHIFT
chr9	23386130	*	-TGTCAATGCCC	ENSBTAT00000021159, RWDD2A	DEL	FRAME_SHIFT
chr9	29748962	*	+C	ENSBTAT00000026433, ENSBTAG00000011735	INS	FRAME_SHIFT
chr9	34534743	*	-T	ENSBTAT00000038028, SULT1C4	DEL	FRAME_SHIFT
chr9	34534743	*	+C	ENSBTAT00000038028, SULT1C4	INS	FRAME_SHIFT
chr9	41196299	*	-AGTG	ENSBTAT00000010714, MICAL1	DEL	FRAME_SHIFT
chr9	41329111	*	-C	ENSBTAT00000047340, ENSBTAG00000026637	DEL	FRAME_SHIFT
chr9	41378013	*	-T	ENSBTAT00000064270, C6orf183	DEL	FRAME_SHIFT
chr9	41756637	*	+AAAAAAA	ENSBTAT00000006360, ARMC2	INS	FRAME_SHIFT
chr9	42569010	*	+CAGGTGC	ENSBTAT00000032643, ENSBTAG00000023792	INS	FRAME_SHIFT
chr9	45543466	*	-G	ENSBTAT00000061356, LIN28B	DEL	FRAME_SHIFT
chr9	49838343	*	-G	ENSBTAT00000064018, ENSBTAG00000045624	DEL	FRAME_SHIFT
chr9	51048692	*	+A	ENSBTAT00000026293, SFRS18	INS	FRAME_SHIFT
chr9	52922672	*	+T	ENSBTAT00000022817, ENSBTAG00000017170	INS	FRAME_SHIFT
chr9	54750780	*	-A	ENSBTAT00000065639, ENSBTAG00000045583	DEL	FRAME_SHIFT
chr9	55111372	*	-A	ENSBTAT00000006614, MANEA	DEL	FRAME_SHIFT
chr9	57516799	*	-G	ENSBTAT00000004870, ENSBTAG00000003743	DEL	FRAME_SHIFT
chr9	57516799	*	-G	ENSBTAT00000055369, ENSBTAG00000003743	DEL	FRAME_SHIFT
chr9	57516814	*	-AC	ENSBTAT00000004870, ENSBTAG00000003743	DEL	FRAME_SHIFT
chr9	57516814	*	-AC	ENSBTAT00000055369, ENSBTAG00000003743	DEL	FRAME_SHIFT
chr9	57812612	*	-C	ENSBTAT00000039578, EPHA7	DEL	FRAME_SHIFT
chr9	61106508	*	-G	ENSBTAT00000056313, ENSBTAG00000047479	DEL	FRAME_SHIFT
chr9	61107087	*	-G	ENSBTAT00000056313, ENSBTAG00000047479	DEL	FRAME_SHIFT
chr9	61361062	*	+A	ENSBTAT00000002157, MDN1	INS	FRAME_SHIFT
chr9	64816773	*	+T	ENSBTAT00000054657, SNX14	INS	FRAME_SHIFT
chr9	64816773	*	+T	ENSBTAT00000031642, SNX14	INS	FRAME_SHIFT
chr9	71492927	*	+T	ENSBTAT00000064665, ENSBTAG00000046954	INS	FRAME_SHIFT
chr9	71658203	*	-C	ENSBTAT00000052087, ENSBTAG00000040489	DEL	FRAME_SHIFT
chr9	71939852	*	-G	ENSBTAT00000020271, SLC18B1	DEL	FRAME_SHIFT
chr9	75242613	*	-CAAT	ENSBTAT00000010261, Q58CR1_BOVIN	DEL	FRAME_SHIFT
chr9	85100923	*	+A	ENSBTAT00000063488, ADGB	INS	FRAME_SHIFT
chr9	85809849	*	+C	ENSBTAT00000064609, ENSBTAG00000047224	INS	FRAME_SHIFT
chr9	85951207	*	-C	ENSBTAT00000055373, A6QQ36_BOVIN	DEL	FRAME_SHIFT
chr9	85951244	*	+AT	ENSBTAT00000055373, A6QQ36_BOVIN	INS	FRAME_SHIFT
chr9	88245708	*	-AAAG	ENSBTAT00000053728, ENSBTAG00000038891	DEL	FRAME_SHIFT
chr9	88245717	*	-GAGCA	ENSBTAT00000053728, ENSBTAG00000038891	DEL	FRAME_SHIFT
chr9	88245723	*	+TTGC	ENSBTAT00000053728, ENSBTAG00000038891	INS	FRAME_SHIFT
chr9	88275202	*	+AC	ENSBTAT00000064751, ENSBTAG00000047902	INS	FRAME_SHIFT
chr9	88275301	*	-TG	ENSBTAT00000064751, ENSBTAG00000047902	DEL	FRAME_SHIFT
chr9	88308835	*	+G	ENSBTAT00000049047, ENSBTAG00000039875	INS	FRAME_SHIFT
chr9	88309284	*	-TG	ENSBTAT00000049047, ENSBTAG00000039875	DEL	FRAME_SHIFT
chr9	88309342	*	+C	ENSBTAT00000049047, ENSBTAG00000039875	INS	FRAME_SHIFT
chr9	88309348	*	-A	ENSBTAT00000049047, ENSBTAG00000039875	DEL	FRAME_SHIFT
chr9	88636132	*	-G	ENSBTAT00000066107, ENSBTAG00000048114	DEL	FRAME_SHIFT
chr9	92484620	*	+AGCCCTAGAAAGCAATAAAAATTCTCTTACAGGGATCACTGATTTCTCAGTGACGAAGAATAAAATTATTAATAATTTTATTCTTCGTCACTGAGAAATCAGTGAGCCCTGTAAATGA	ENSBTAT00000016838, ENSBTAG00000012674	INS	FRAME_SHIFT
chr9	93153454	*	-A	ENSBTAT00000013256, TIAM2	DEL	FRAME_SHIFT
chr9	93261901	*	+TA	ENSBTAT00000063680, CLDN20	INS	FRAME_SHIFT
chr9	95260269	*	+G	ENSBTAT00000061484, ARID1B	INS	FRAME_SHIFT
chr9	95260269	*	+G	ENSBTAT00000003537, ARID1B	INS	FRAME_SHIFT
chr9	95260345	*	+C	ENSBTAT00000061484, ARID1B	INS	FRAME_SHIFT
chr9	95260345	*	+C	ENSBTAT00000003537, ARID1B	INS	FRAME_SHIFT
chr9	95271588	*	-T	ENSBTAT00000003537, ARID1B	DEL	FRAME_SHIFT
chr9	95271589	*	+T	ENSBTAT00000003537, ARID1B	INS	FRAME_SHIFT
chr9	95271590	*	+G	ENSBTAT00000003537, ARID1B	INS	FRAME_SHIFT
chr9	95902640	*	-C	ENSBTAT00000066150, SNX9	DEL	FRAME_SHIFT
chr9	100280858	*	-C	ENSBTAT00000055048, ENSBTAG00000037598	DEL	FRAME_SHIFT
chr10	3586401	*	-TG	ENSBTAT00000001335, ENSBTAG00000023186	DEL	FRAME_SHIFT
chr10	3999252	*	+A	ENSBTAT00000002466, PGGT1B	INS	FRAME_SHIFT
chr10	5128695	*	-TTTTTTT	ENSBTAT00000049661, THOC3	DEL	FRAME_SHIFT
chr10	6983891	*	+AACTTGAA	ENSBTAT00000061288, ANKDD1B	INS	FRAME_SHIFT
chr10	9994032	*	-G	ENSBTAT00000036611, DMGDH	DEL	FRAME_SHIFT
chr10	9994032	*	-GT	ENSBTAT00000036611, DMGDH	DEL	FRAME_SHIFT
chr10	12100283	*	+C	ENSBTAT00000003651, CILP	INS	FRAME_SHIFT
chr10	12100338	*	-C	ENSBTAT00000003651, CILP	DEL	FRAME_SHIFT
chr10	12795264	*	-C	ENSBTAT00000036967, MEGF11	DEL	FRAME_SHIFT
chr10	14409513	*	+A	ENSBTAT00000000265, MAP2K5	INS	FRAME_SHIFT
chr10	15570480	*	+C	ENSBTAT00000063064, ENSBTAG00000045866	INS	FRAME_SHIFT
chr10	15570754	*	-A	ENSBTAT00000063064, ENSBTAG00000045866	DEL	FRAME_SHIFT
chr10	15570756	*	-ATGAGGAA	ENSBTAT00000063064, ENSBTAG00000045866	DEL	FRAME_SHIFT
chr10	19981003	*	+C	ENSBTAT00000023219, HCN4	INS	FRAME_SHIFT
chr10	20580244	*	+G	ENSBTAT00000014103, CBLN3	INS	FRAME_SHIFT
chr10	20736307	*	-GGT	ENSBTAT00000005119, F1MBB7_BOVIN	DEL	FRAME_SHIFT
chr10	20900849	*	+C	ENSBTAT00000002436, CPNE6_BOVIN	INS	FRAME_SHIFT
chr10	20905456	*	-G	ENSBTAT00000061091, LRRC16B	DEL	FRAME_SHIFT
chr10	22007820	*	+TC	ENSBTAT00000066332, OR6J1	INS	FRAME_SHIFT
chr10	22008448	*	+AT	ENSBTAT00000066332, OR6J1	INS	FRAME_SHIFT
chr10	22318730	*	-T	ENSBTAT00000057165, ENSBTAG00000039402	DEL	FRAME_SHIFT
chr10	22318729	*	-TT	ENSBTAT00000057165, ENSBTAG00000039402	DEL	FRAME_SHIFT
chr10	22318731	*	+T	ENSBTAT00000057165, ENSBTAG00000039402	INS	FRAME_SHIFT
chr10	22318741	*	-TTTTTTGATTTATTTA	ENSBTAT00000057165, ENSBTAG00000039402	DEL	FRAME_SHIFT
chr10	22631665	*	-A	ENSBTAT00000065701, ENSBTAG00000047258	DEL	FRAME_SHIFT
chr10	22631812	*	+T	ENSBTAT00000065701, ENSBTAG00000047258	INS	FRAME_SHIFT
chr10	22631827	*	-T	ENSBTAT00000065701, ENSBTAG00000047258	DEL	FRAME_SHIFT
chr10	22631890	*	+G	ENSBTAT00000065701, ENSBTAG00000047258	INS	FRAME_SHIFT
chr10	22674651	*	+T	ENSBTAT00000050719, ENSBTAG00000045758	INS	FRAME_SHIFT
chr10	22674658	*	+GA	ENSBTAT00000050719, ENSBTAG00000045758	INS	FRAME_SHIFT
chr10	22821826	*	-C	ENSBTAT00000064286, ENSBTAG00000047041	DEL	FRAME_SHIFT
chr10	23099549	*	+T	ENSBTAT00000053098, TRAV29DV5	INS	FRAME_SHIFT
chr10	23778845	*	-A	ENSBTAT00000065615, ENSBTAG00000047398	DEL	FRAME_SHIFT
chr10	23934284	*	+CC	ENSBTAT00000052239, ENSBTAG00000039807	INS	FRAME_SHIFT
chr10	23934286	*	-TA	ENSBTAT00000052239, ENSBTAG00000039807	DEL	FRAME_SHIFT
chr10	24007337	*	-G	ENSBTAT00000051943, ENSBTAG00000039038	DEL	FRAME_SHIFT
chr10	24008511	*	-ACTT	ENSBTAT00000051943, ENSBTAG00000039038	DEL	FRAME_SHIFT
chr10	24646669	*	-G	ENSBTAT00000064032, ENSBTAG00000046802	DEL	FRAME_SHIFT
chr10	25059941	*	-CT	ENSBTAT00000064546, TRAV18	DEL	FRAME_SHIFT
chr10	25090631	*	+G	ENSBTAT00000064415, ENSBTAG00000045883	INS	FRAME_SHIFT
chr10	25547644	*	+A	ENSBTAT00000008541, TRAV3	INS	FRAME_SHIFT
chr10	25547644	*	+AA	ENSBTAT00000008541, TRAV3	INS	FRAME_SHIFT
chr10	26059694	*	-GGATGACACGGCCACCGAGGCCC	ENSBTAT00000017829, ARHGEF40	DEL	FRAME_SHIFT
chr10	26320737	*	-C	ENSBTAT00000046671, F1MSQ0_BOVIN	DEL	FRAME_SHIFT
chr10	26681556	*	+ATATA	ENSBTAT00000051987, ENSBTAG00000037452	INS	FRAME_SHIFT
chr10	26681557	*	-TGCGT	ENSBTAT00000051987, ENSBTAG00000037452	DEL	FRAME_SHIFT
chr10	26902126	*	+G	ENSBTAT00000052513, ENSBTAG00000015983	INS	FRAME_SHIFT
chr10	26902127	*	+A	ENSBTAT00000052513, ENSBTAG00000015983	INS	FRAME_SHIFT
chr10	26932172	*	-C	ENSBTAT00000014647, ENSBTAG00000032799	DEL	FRAME_SHIFT
chr10	26963244	*	-AGACTAT	ENSBTAT00000008138, ENSBTAG00000006198	DEL	FRAME_SHIFT
chr10	27072126	*	+GA	ENSBTAT00000063795, ENSBTAG00000048109	INS	FRAME_SHIFT
chr10	27154162	*	+AG	ENSBTAT00000052198, ENSBTAG00000039416	INS	FRAME_SHIFT
chr10	27154165	*	-GC	ENSBTAT00000052198, ENSBTAG00000039416	DEL	FRAME_SHIFT
chr10	27154393	*	-G	ENSBTAT00000052198, ENSBTAG00000039416	DEL	FRAME_SHIFT
chr10	27190137	*	+A	ENSBTAT00000055011, ENSBTAG00000038672	INS	FRAME_SHIFT
chr10	27217115	*	-T	ENSBTAT00000054043, F1MIF7_BOVIN	DEL	FRAME_SHIFT
chr10	27277906	*	-AA	ENSBTAT00000039095, E1BMZ1_BOVIN	DEL	FRAME_SHIFT
chr10	27641799	*	-AT	ENSBTAT00000066089, ENSBTAG00000047984	DEL	FRAME_SHIFT
chr10	27641804	*	+TT	ENSBTAT00000066089, ENSBTAG00000047984	INS	FRAME_SHIFT
chr10	27827817	*	-ACTGTGACTTTCCTCGGGTCATGAA	ENSBTAT00000062963, ENSBTAG00000047566	DEL	FRAME_SHIFT
chr10	27828043	*	+ATGTATGT	ENSBTAT00000062963, ENSBTAG00000047566	INS	FRAME_SHIFT
chr10	27828139	*	+CATTTATA	ENSBTAT00000062963, ENSBTAG00000047566	INS	FRAME_SHIFT
chr10	27842996	*	-ACCCCCATGTATGTTCTATTGGCCA	ENSBTAT00000055146, F1MR72_BOVIN	DEL	FRAME_SHIFT
chr10	27989292	*	-TTTT	ENSBTAT00000004616, ENSBTAG00000003549	DEL	FRAME_SHIFT
chr10	27989296	*	+T	ENSBTAT00000004616, ENSBTAG00000003549	INS	FRAME_SHIFT
chr10	27989461	*	-A	ENSBTAT00000004616, ENSBTAG00000003549	DEL	FRAME_SHIFT
chr10	28137806	*	+A	ENSBTAT00000055778, ENSBTAG00000038083	INS	FRAME_SHIFT
chr10	28501281	*	+A	ENSBTAT00000008409, C15orf29	INS	FRAME_SHIFT
chr10	28981150	*	-TTTT	ENSBTAT00000036191, RYR3	DEL	FRAME_SHIFT
chr10	28981149	*	-TTTTT	ENSBTAT00000036191, RYR3	DEL	FRAME_SHIFT
chr10	28981154	*	+TT	ENSBTAT00000036191, RYR3	INS	FRAME_SHIFT
chr10	28981154	*	+T	ENSBTAT00000036191, RYR3	INS	FRAME_SHIFT
chr10	30457098	*	+C	ENSBTAT00000016895, AQR	INS	FRAME_SHIFT
chr10	36102866	*	-C	ENSBTAT00000000723, DISP2	DEL	FRAME_SHIFT
chr10	36102875	*	+G	ENSBTAT00000000723, DISP2	INS	FRAME_SHIFT
chr10	41944537	*	-G	ENSBTAT00000065865, ENSBTAG00000047222	DEL	FRAME_SHIFT
chr10	42696125	*	+ACTACTACCATGAATTTACATAACAGGCTAGAGAACAGAAGTAAGAAATAATGGGTGCTTCAGTACCACCCATATTATCT	ENSBTAT00000006480, A6QPV4_BOVIN	INS	FRAME_SHIFT
chr10	43113780	*	+T	ENSBTAT00000007299, SOS2	INS	FRAME_SHIFT
chr10	47456330	*	+CGGCA	ENSBTAT00000061376, TLN2	INS	FRAME_SHIFT
chr10	51570518	*	-GCGCCCC	ENSBTAT00000016444, FA63B_BOVIN	DEL	FRAME_SHIFT
chr10	51570527	*	-TCTCCCTCTGGAC	ENSBTAT00000016444, FA63B_BOVIN	DEL	FRAME_SHIFT
chr10	54832220	*	+CACACACA	ENSBTAT00000061599, PRTG	INS	FRAME_SHIFT
chr10	54832250	*	-CGCGCACA	ENSBTAT00000061599, PRTG	DEL	FRAME_SHIFT
chr10	54832256	*	-CACA	ENSBTAT00000061599, PRTG	DEL	FRAME_SHIFT
chr10	59587766	*	+T	ENSBTAT00000061383, AP4E1	INS	FRAME_SHIFT
chr10	59587767	*	+CT	ENSBTAT00000061383, AP4E1	INS	FRAME_SHIFT
chr10	59966936	*	-TTTTT	ENSBTAT00000015823, USP50	DEL	FRAME_SHIFT
chr10	59966941	*	+AACC	ENSBTAT00000015823, USP50	INS	FRAME_SHIFT
chr10	60203336	*	+T	ENSBTAT00000021019, ENSBTAG00000045591	INS	FRAME_SHIFT
chr10	61420563	*	-G	ENSBTAT00000065830, SECISBP2L	DEL	FRAME_SHIFT
chr10	61420564	*	-AA	ENSBTAT00000065830, SECISBP2L	DEL	FRAME_SHIFT
chr10	61420618	*	+T	ENSBTAT00000065830, SECISBP2L	INS	FRAME_SHIFT
chr10	61420617	*	-T	ENSBTAT00000065830, SECISBP2L	DEL	FRAME_SHIFT
chr10	61556892	*	+C	ENSBTAT00000006872, ENSBTAG00000005217	INS	FRAME_SHIFT
chr10	65355259	*	-CCCTGTAG	ENSBTAT00000039065, ENSBTAG00000027251	DEL	FRAME_SHIFT
chr10	65410095	*	-A	ENSBTAT00000021720, A4UQU4_BOVIN	DEL	FRAME_SHIFT
chr10	65656489	*	+GA	ENSBTAT00000052094, ENSBTAG00000038327	INS	FRAME_SHIFT
chr10	65657431	*	+G	ENSBTAT00000052094, ENSBTAG00000038327	INS	FRAME_SHIFT
chr10	66693216	*	-A	ENSBTAT00000064748, ENSBTAG00000047239	DEL	FRAME_SHIFT
chr10	69300282	*	-A	ENSBTAT00000052373, C10H14orf101	DEL	FRAME_SHIFT
chr10	70071405	*	-T	ENSBTAT00000043680, C14orf105	DEL	FRAME_SHIFT
chr10	70071404	*	-TT	ENSBTAT00000043680, C14orf105	DEL	FRAME_SHIFT
chr10	76488755	*	-TT	ENSBTAT00000029285, SYNE2	DEL	FRAME_SHIFT
chr10	77004191	*	-A	ENSBTAT00000065636, PPP1R36	DEL	FRAME_SHIFT
chr10	79627000	*	-C	ENSBTAT00000021623, A6QLP8_BOVIN	DEL	FRAME_SHIFT
chr10	83187460	*	+G	ENSBTAT00000012088, E1BLQ8_BOVIN	INS	FRAME_SHIFT
chr10	87345008	*	-T	ENSBTAT00000064073, ENSBTAG00000026909	DEL	FRAME_SHIFT
chr10	87345008	*	-T	ENSBTAT00000038502, ENSBTAG00000026909	DEL	FRAME_SHIFT
chr10	87345008	*	-T	ENSBTAT00000065413, ENSBTAG00000026909	DEL	FRAME_SHIFT
chr10	87345218	*	-GG	ENSBTAT00000064073, ENSBTAG00000026909	DEL	FRAME_SHIFT
chr10	87345218	*	-GG	ENSBTAT00000038502, ENSBTAG00000026909	DEL	FRAME_SHIFT
chr10	87345218	*	-GG	ENSBTAT00000065413, ENSBTAG00000026909	DEL	FRAME_SHIFT
chr10	87345221	*	-G	ENSBTAT00000064073, ENSBTAG00000026909	DEL	FRAME_SHIFT
chr10	87345221	*	-G	ENSBTAT00000038502, ENSBTAG00000026909	DEL	FRAME_SHIFT
chr10	87345221	*	-G	ENSBTAT00000065413, ENSBTAG00000026909	DEL	FRAME_SHIFT
chr10	87898379	*	-TC	ENSBTAT00000015901, ENSBTAG00000011985	DEL	FRAME_SHIFT
chr10	87898382	*	+TG	ENSBTAT00000015901, ENSBTAG00000011985	INS	FRAME_SHIFT
chr10	89603408	*	-T	ENSBTAT00000003503, GSTZ1	DEL	FRAME_SHIFT
chr10	93690652	*	+C	ENSBTAT00000061260, ENSBTAG00000025308	INS	FRAME_SHIFT
chr10	102147332	*	+G	ENSBTAT00000065076, FOXN3	INS	FRAME_SHIFT
chr10	102147332	*	+G	ENSBTAT00000064571, FOXN3	INS	FRAME_SHIFT
chr10	102147419	*	+A	ENSBTAT00000065076, FOXN3	INS	FRAME_SHIFT
chr10	102147419	*	+A	ENSBTAT00000064571, FOXN3	INS	FRAME_SHIFT
chr10	103309056	*	+GTGT	ENSBTAT00000064868, TTC7B	INS	FRAME_SHIFT
chr10	103309046	*	-GTGTGTGTGT	ENSBTAT00000064868, TTC7B	DEL	FRAME_SHIFT
chr10	103309054	*	-GT	ENSBTAT00000064868, TTC7B	DEL	FRAME_SHIFT
chr10	103309056	*	+GT	ENSBTAT00000064868, TTC7B	INS	FRAME_SHIFT
chr10	104002637	*	+G	ENSBTAT00000000465, EIF3J_BOVIN	INS	FRAME_SHIFT
chr11	91091	*	+T	ENSBTAT00000027514, ZC3H6	INS	FRAME_SHIFT
chr11	2526247	*	-G	ENSBTAT00000064181, ARI5A_BOVIN	DEL	FRAME_SHIFT
chr11	2526247	*	-G	ENSBTAT00000026200, ARI5A_BOVIN	DEL	FRAME_SHIFT
chr11	2785210	*	-GGCGAGGGGGG	ENSBTAT00000029225, SEMA4C	DEL	FRAME_SHIFT
chr11	2785226	*	+T	ENSBTAT00000029225, SEMA4C	INS	FRAME_SHIFT
chr11	3511040	*	+A	ENSBTAT00000048703, ENSBTAG00000034384	INS	FRAME_SHIFT
chr11	3511040	*	+A	ENSBTAT00000025796, ENSBTAG00000034384	INS	FRAME_SHIFT
chr11	3511050	*	+A	ENSBTAT00000048703, ENSBTAG00000034384	INS	FRAME_SHIFT
chr11	3511050	*	+A	ENSBTAT00000025796, ENSBTAG00000034384	INS	FRAME_SHIFT
chr11	3511050	*	+G	ENSBTAT00000048703, ENSBTAG00000034384	INS	FRAME_SHIFT
chr11	3511050	*	+G	ENSBTAT00000025796, ENSBTAG00000034384	INS	FRAME_SHIFT
chr11	3511062	*	+C	ENSBTAT00000048703, ENSBTAG00000034384	INS	FRAME_SHIFT
chr11	3511062	*	+C	ENSBTAT00000025796, ENSBTAG00000034384	INS	FRAME_SHIFT
chr11	4274265	*	-TATCCACTGCT	ENSBTAT00000063993, C2orf15	DEL	FRAME_SHIFT
chr11	4465357	*	+A	ENSBTAT00000034635, EIF5B	INS	FRAME_SHIFT
chr11	5434585	*	+TT	ENSBTAT00000064785, LONRF2	INS	FRAME_SHIFT
chr11	5434585	*	+TT	ENSBTAT00000064862, LONRF2	INS	FRAME_SHIFT
chr11	5434585	*	+TT	ENSBTAT00000005666, LONRF2	INS	FRAME_SHIFT
chr11	6613370	*	+GGTGAAGCTGGGTAAGTGTGATCTGATGCCCGCCGGGGTGCATCAGATCT	ENSBTAT00000006458, ENSBTAG00000013023	INS	FRAME_SHIFT
chr11	16159508	*	+T	ENSBTAT00000011270, FAM98A	INS	FRAME_SHIFT
chr11	18928531	*	+G	ENSBTAT00000011877, ENSBTAG00000009020	INS	FRAME_SHIFT
chr11	18928532	*	+CC	ENSBTAT00000011877, ENSBTAG00000009020	INS	FRAME_SHIFT
chr11	21300629	*	-AG	ENSBTAT00000022655, ARHGEF33	DEL	FRAME_SHIFT
chr11	25184812	*	+GGAGGGAGGGAGAGAGGGAGCCA	ENSBTAT00000005326, OXER1	INS	FRAME_SHIFT
chr11	25334942	*	-G	ENSBTAT00000019759, ENSBTAG00000014836	DEL	FRAME_SHIFT
chr11	27651110	*	-AAAAAAA	ENSBTAT00000066115, SRBD1	DEL	FRAME_SHIFT
chr11	30962762	*	-T	ENSBTAT00000038679, ENSBTAG00000027015	DEL	FRAME_SHIFT
chr11	36808640	*	-GAAG	ENSBTAT00000065075, TSPYL6	DEL	FRAME_SHIFT
chr11	44479331	*	+T	ENSBTAT00000066308, CCDC138	INS	FRAME_SHIFT
chr11	44479331	*	+T	ENSBTAT00000000181, CCDC138	INS	FRAME_SHIFT
chr11	46310178	*	+AAGAA	ENSBTAT00000045418, NT5DC4	INS	FRAME_SHIFT
chr11	46310180	*	-T	ENSBTAT00000045418, NT5DC4	DEL	FRAME_SHIFT
chr11	46767100	*	-TC	ENSBTAT00000025391, PSD4	DEL	FRAME_SHIFT
chr11	47050902	*	-T	ENSBTAT00000063143, E1BEQ3_BOVIN	DEL	FRAME_SHIFT
chr11	59987816	*	-A	ENSBTAT00000007921, F1N0A8_BOVIN	DEL	FRAME_SHIFT
chr11	59987816	*	-A	ENSBTAT00000064054, F1N0A8_BOVIN	DEL	FRAME_SHIFT
chr11	65503144	*	+CTGA	ENSBTAT00000065719, ENSBTAG00000046310	INS	FRAME_SHIFT
chr11	68688315	*	+C	ENSBTAT00000021091, CAPN14	INS	FRAME_SHIFT
chr11	68688322	*	-CTGCTGCGGAA	ENSBTAT00000021091, CAPN14	DEL	FRAME_SHIFT
chr11	72497862	*	+T	ENSBTAT00000009303, ABHD1_BOVIN	INS	FRAME_SHIFT
chr11	72527631	*	+T	ENSBTAT00000015052, KHK	INS	FRAME_SHIFT
chr11	72527631	*	+T	ENSBTAT00000053651, KHK	INS	FRAME_SHIFT
chr11	72527634	*	-T	ENSBTAT00000015052, KHK	DEL	FRAME_SHIFT
chr11	72527634	*	-T	ENSBTAT00000053651, KHK	DEL	FRAME_SHIFT
chr11	72570283	*	-C	ENSBTAT00000017831, CBPC5_BOVIN	DEL	FRAME_SHIFT
chr11	73186411	*	-GA	ENSBTAT00000023039, IR3IP_BOVIN	DEL	FRAME_SHIFT
chr11	73299777	*	+CC	ENSBTAT00000020013, FAM59B	INS	FRAME_SHIFT
chr11	73299777	*	+CC	ENSBTAT00000065242, FAM59B	INS	FRAME_SHIFT
chr11	74525224	*	-A	ENSBTAT00000064008, ENSBTAG00000015007	DEL	FRAME_SHIFT
chr11	75166023	*	-AT	ENSBTAT00000012179, ATAD2B	DEL	FRAME_SHIFT
chr11	75166047	*	-TGTGTG	ENSBTAT00000012179, ATAD2B	DEL	FRAME_SHIFT
chr11	78274111	*	-GCCGCCGC	ENSBTAT00000056229, O02784_BOVIN	DEL	FRAME_SHIFT
chr11	80970221	*	-T	ENSBTAT00000043571, GEN1	DEL	FRAME_SHIFT
chr11	86051305	*	+T	ENSBTAT00000043424, LPIN1	INS	FRAME_SHIFT
chr11	86187502	*	-C	ENSBTAT00000004808, NTSR2	DEL	FRAME_SHIFT
chr11	87637681	*	-T	ENSBTAT00000043676, Q1JQD6_BOVIN	DEL	FRAME_SHIFT
chr11	93639324	*	-GA	ENSBTAT00000053513, F1MPC7_BOVIN	DEL	FRAME_SHIFT
chr11	93639332	*	+T	ENSBTAT00000053513, F1MPC7_BOVIN	INS	FRAME_SHIFT
chr11	93646362	*	-A	ENSBTAT00000064828, ENSBTAG00000047728	DEL	FRAME_SHIFT
chr11	93646645	*	-C	ENSBTAT00000064828, ENSBTAG00000047728	DEL	FRAME_SHIFT
chr11	93670217	*	+TTGAGAGACATGCA	ENSBTAT00000063155, ENSBTAG00000046536	INS	FRAME_SHIFT
chr11	93692825	*	+T	ENSBTAT00000064216, ENSBTAG00000045545	INS	FRAME_SHIFT
chr11	93731211	*	-C	ENSBTAT00000054542, ENSBTAG00000038551	DEL	FRAME_SHIFT
chr11	93731784	*	-TC	ENSBTAT00000054542, ENSBTAG00000038551	DEL	FRAME_SHIFT
chr11	94931869	*	-G	ENSBTAT00000027932, F1MBI9_BOVIN	DEL	FRAME_SHIFT
chr11	96116601	*	+A	ENSBTAT00000057533, Q6KDN8_BOVIN	INS	FRAME_SHIFT
chr11	96116711	*	+C	ENSBTAT00000057533, Q6KDN8_BOVIN	INS	FRAME_SHIFT
chr11	96117636	*	-C	ENSBTAT00000057533, Q6KDN8_BOVIN	DEL	FRAME_SHIFT
chr11	98603156	*	+T	ENSBTAT00000043239, PIP5KL1	INS	FRAME_SHIFT
chr11	98793824	*	-G	ENSBTAT00000018806, E1B6Z6_BOVIN	DEL	FRAME_SHIFT
chr11	98895129	*	+G	ENSBTAT00000015044, ENSBTAG00000011317	INS	FRAME_SHIFT
chr11	99055937	*	-TTTG	ENSBTAT00000020325, ODF2	DEL	FRAME_SHIFT
chr11	99055942	*	+CGTG	ENSBTAT00000020325, ODF2	INS	FRAME_SHIFT
chr11	100051227	*	+A	ENSBTAT00000054390, ENSBTAG00000038183	INS	FRAME_SHIFT
chr11	101169697	*	+C	ENSBTAT00000023924, FIBCD1	INS	FRAME_SHIFT
chr11	101169702	*	+G	ENSBTAT00000023924, FIBCD1	INS	FRAME_SHIFT
chr11	101293930	*	+T	ENSBTAT00000023245, LAMC3	INS	FRAME_SHIFT
chr11	102417062	*	+CA	ENSBTAT00000042924, SETX	INS	FRAME_SHIFT
chr11	102417103	*	-G	ENSBTAT00000042924, SETX	DEL	FRAME_SHIFT
chr11	102494383	*	+AATGATAAAACAGTTAGGCCGG	ENSBTAT00000000236, ENSBTAG00000023697	INS	FRAME_SHIFT
chr11	102494383	*	+AATGATAAAACAGTTAGGCCAG	ENSBTAT00000000236, ENSBTAG00000023697	INS	FRAME_SHIFT
chr11	103286517	*	+G	ENSBTAT00000065847, ENSBTAG00000048091	INS	FRAME_SHIFT
chr11	103347840	*	+C	ENSBTAT00000008615, SOHLH1	INS	FRAME_SHIFT
chr11	103869522	*	+C	ENSBTAT00000025023, GPSM1	INS	FRAME_SHIFT
chr11	103875638	*	-C	ENSBTAT00000017114, DNLZ	DEL	FRAME_SHIFT
chr11	103887508	*	-CT	ENSBTAT00000000060, SNAPC4	DEL	FRAME_SHIFT
chr11	103887508	*	-CT	ENSBTAT00000042731, SNAPC4	DEL	FRAME_SHIFT
chr11	103892988	*	-AGGAGAGCCCACGCAGCAGCAGGGATCCCGCTCGCCACAGCTAA	ENSBTAT00000000060, SNAPC4	DEL	FRAME_SHIFT
chr11	103892988	*	-AGGAGAGCCCACGCAGCAGCAGGGATCCCGCTCGCCACAGCTAA	ENSBTAT00000042731, SNAPC4	DEL	FRAME_SHIFT
chr11	103914131	*	-G	ENSBTAT00000055628, SDCG3_BOVIN	DEL	FRAME_SHIFT
chr11	103917920	*	-GT	ENSBTAT00000001782, MPPA_BOVIN	DEL	FRAME_SHIFT
chr11	104134856	*	+T	ENSBTAT00000035230, AGPAT2	INS	FRAME_SHIFT
chr11	104310958	*	-G	ENSBTAT00000015357, MED22_BOVIN	DEL	FRAME_SHIFT
chr11	104319187	*	+G	ENSBTAT00000042893, SURF1	INS	FRAME_SHIFT
chr11	104378768	*	-ACACAC	ENSBTAT00000020085, ADAMTS13	DEL	FRAME_SHIFT
chr11	104378774	*	+AC	ENSBTAT00000020085, ADAMTS13	INS	FRAME_SHIFT
chr11	104378774	*	+ACAC	ENSBTAT00000020085, ADAMTS13	INS	FRAME_SHIFT
chr11	104378770	*	-ACAC	ENSBTAT00000020085, ADAMTS13	DEL	FRAME_SHIFT
chr11	105711142	*	+G	ENSBTAT00000066207, A6QP59_BOVIN	INS	FRAME_SHIFT
chr11	105711142	*	+G	ENSBTAT00000016076, A6QP59_BOVIN	INS	FRAME_SHIFT
chr11	105760705	*	-CCCGGCCAAGCTCCGCC	ENSBTAT00000032625, EXD3	DEL	FRAME_SHIFT
chr11	105866652	*	-TG	ENSBTAT00000063824, SLC34A3	DEL	FRAME_SHIFT
chr11	105875143	*	+G	ENSBTAT00000064095, CI169_BOVIN	INS	FRAME_SHIFT
chr11	105875145	*	+TG	ENSBTAT00000064095, CI169_BOVIN	INS	FRAME_SHIFT
chr11	105875149	*	-C	ENSBTAT00000064095, CI169_BOVIN	DEL	FRAME_SHIFT
chr11	105875155	*	-GG	ENSBTAT00000064095, CI169_BOVIN	DEL	FRAME_SHIFT
chr11	106188660	*	-A	ENSBTAT00000063714, ENTPD2	DEL	FRAME_SHIFT
chr11	106221740	*	+AG	ENSBTAT00000065373, ENSBTAG00000047254	INS	FRAME_SHIFT
chr11	106221740	*	+AG	ENSBTAT00000063417, ENSBTAG00000047254	INS	FRAME_SHIFT
chr11	106429340	*	+GGGGGCAAGCGTGAGGTGCTCGTCTT	ENSBTAT00000012632, LCN1	INS	FRAME_SHIFT
chr11	106430118	*	-C	ENSBTAT00000012632, LCN1	DEL	FRAME_SHIFT
chr11	106906514	*	+G	ENSBTAT00000063052, ENSBTAG00000047998	INS	FRAME_SHIFT
chr12	707907	*	-T	ENSBTAT00000040346, ENSBTAG00000035926	DEL	FRAME_SHIFT
chr12	11162144	*	+A	ENSBTAT00000002771, SUGT1_BOVIN	INS	FRAME_SHIFT
chr12	11565677	*	+A	ENSBTAT00000061596, NAA16	INS	FRAME_SHIFT
chr12	12027786	*	+A	ENSBTAT00000063788, KIAA0564	INS	FRAME_SHIFT
chr12	12027786	*	+A	ENSBTAT00000001508, KIAA0564	INS	FRAME_SHIFT
chr12	12027786	*	+AAAAA	ENSBTAT00000063788, KIAA0564	INS	FRAME_SHIFT
chr12	12027786	*	+AAAAA	ENSBTAT00000001508, KIAA0564	INS	FRAME_SHIFT
chr12	16373732	*	+AA	ENSBTAT00000064516, LRRC63	INS	FRAME_SHIFT
chr12	16373779	*	+G	ENSBTAT00000064516, LRRC63	INS	FRAME_SHIFT
chr12	20480311	*	+A	ENSBTAT00000026838, RNH2B_BOVIN	INS	FRAME_SHIFT
chr12	21757977	*	-T	ENSBTAT00000035777, ENSBTAG00000011654	DEL	FRAME_SHIFT
chr12	23269280	*	-CCGC	ENSBTAT00000014539, PROSER1	DEL	FRAME_SHIFT
chr12	23269286	*	-CGGGCCACTCC	ENSBTAT00000014539, PROSER1	DEL	FRAME_SHIFT
chr12	26329077	*	-ATAACTA	ENSBTAT00000061623, NBEA	DEL	FRAME_SHIFT
chr12	28811609	*	+CCACGTGGGT	ENSBTAT00000035734, FRY	INS	FRAME_SHIFT
chr12	33984560	*	-A	ENSBTAT00000061132, ATP8A2	DEL	FRAME_SHIFT
chr12	33990708	*	-GA	ENSBTAT00000026022, ATP8A2	DEL	FRAME_SHIFT
chr12	33990710	*	-AC	ENSBTAT00000026022, ATP8A2	DEL	FRAME_SHIFT
chr12	33990711	*	-C	ENSBTAT00000026022, ATP8A2	DEL	FRAME_SHIFT
chr12	39941265	*	-TT	ENSBTAT00000046828, ENSBTAG00000032984	DEL	FRAME_SHIFT
chr12	47782258	*	+G	ENSBTAT00000026496, BORA	INS	FRAME_SHIFT
chr12	51361445	*	-C	ENSBTAT00000046681, ENSBTAG00000032878	DEL	FRAME_SHIFT
chr12	72079057	*	-AC	ENSBTAT00000035486, ENSBTAG00000045751	DEL	FRAME_SHIFT
chr12	72079062	*	+CA	ENSBTAT00000035486, ENSBTAG00000045751	INS	FRAME_SHIFT
chr12	72177875	*	+A	ENSBTAT00000035486, ENSBTAG00000045751	INS	FRAME_SHIFT
chr12	72201293	*	-TA	ENSBTAT00000035486, ENSBTAG00000045751	DEL	FRAME_SHIFT
chr12	72617080	*	-T	ENSBTAT00000035476, ENSBTAG00000047181	DEL	FRAME_SHIFT
chr12	73617709	*	-A	ENSBTAT00000030481, ENSBTAG00000046041	DEL	FRAME_SHIFT
chr12	73938223	*	-T	ENSBTAT00000010182, ENSBTAG00000047764	DEL	FRAME_SHIFT
chr12	73957634	*	+TCTGG	ENSBTAT00000010182, ENSBTAG00000047764	INS	FRAME_SHIFT
chr12	73957634	*	+TATGG	ENSBTAT00000010182, ENSBTAG00000047764	INS	FRAME_SHIFT
chr12	73957635	*	-CC	ENSBTAT00000010182, ENSBTAG00000047764	DEL	FRAME_SHIFT
chr12	74967953	*	+CC	ENSBTAT00000035479, ENSBTAG00000023309	INS	FRAME_SHIFT
chr12	74967954	*	-TG	ENSBTAT00000035479, ENSBTAG00000023309	DEL	FRAME_SHIFT
chr12	75705117	*	+T	ENSBTAT00000035484, ENSBTAG00000039714	INS	FRAME_SHIFT
chr12	75719274	*	-A	ENSBTAT00000035484, ENSBTAG00000039714	DEL	FRAME_SHIFT
chr12	75821930	*	-C	ENSBTAT00000035484, ENSBTAG00000039714	DEL	FRAME_SHIFT
chr12	75821932	*	-C	ENSBTAT00000035484, ENSBTAG00000039714	DEL	FRAME_SHIFT
chr12	75845640	*	-A	ENSBTAT00000035484, ENSBTAG00000039714	DEL	FRAME_SHIFT
chr12	75845648	*	-TCTGG	ENSBTAT00000035484, ENSBTAG00000039714	DEL	FRAME_SHIFT
chr12	75845656	*	-CCTTTAA	ENSBTAT00000035484, ENSBTAG00000039714	DEL	FRAME_SHIFT
chr12	77119897	*	-TT	ENSBTAT00000005775, UGGT2	DEL	FRAME_SHIFT
chr12	88274144	*	-C	ENSBTAT00000024275, MYO16	DEL	FRAME_SHIFT
chr12	89140514	*	-G	ENSBTAT00000005916, COL4A2	DEL	FRAME_SHIFT
chr12	91026874	*	+A	ENSBTAT00000000065, RPL22	INS	FRAME_SHIFT
chr12	91155680	*	-CTCT	ENSBTAT00000052308, ENSBTAG00000023187	DEL	FRAME_SHIFT
chr13	216572	*	-A	ENSBTAT00000052204, OR4S2	DEL	FRAME_SHIFT
chr13	338477	*	-C	ENSBTAT00000034665, ENSBTAG00000024891	DEL	FRAME_SHIFT
chr13	423002	*	-ACC	ENSBTAT00000036333, ENSBTAG00000025720	DEL	FRAME_SHIFT
chr13	7647863	*	-AGCAGCAGCAGCAGCAGT	ENSBTAT00000026798, SEL1L2	DEL	FRAME_SHIFT
chr13	10977871	*	-AAG	ENSBTAT00000050711, ENSBTAG00000023169	DEL	FRAME_SHIFT
chr13	10978361	*	+CTCTGTGAGGACT	ENSBTAT00000050711, ENSBTAG00000023169	INS	FRAME_SHIFT
chr13	11163639	*	+G	ENSBTAT00000011189, ENSBTAG00000004354	INS	FRAME_SHIFT
chr13	11166740	*	+CA	ENSBTAT00000011189, ENSBTAG00000004354	INS	FRAME_SHIFT
chr13	11176710	*	+CTCAACT	ENSBTAT00000011189, ENSBTAG00000004354	INS	FRAME_SHIFT
chr13	11176711	*	-GG	ENSBTAT00000011189, ENSBTAG00000004354	DEL	FRAME_SHIFT
chr13	11177434	*	+A	ENSBTAT00000011189, ENSBTAG00000004354	INS	FRAME_SHIFT
chr13	11318261	*	-C	ENSBTAT00000031151, Q0V8G6_BOVIN	DEL	FRAME_SHIFT
chr13	11402529	*	-A	ENSBTAT00000008040, ENSBTAG00000040046	DEL	FRAME_SHIFT
chr13	11402530	*	+A	ENSBTAT00000008040, ENSBTAG00000040046	INS	FRAME_SHIFT
chr13	11429503	*	+A	ENSBTAT00000008040, ENSBTAG00000040046	INS	FRAME_SHIFT
chr13	11544100	*	-G	ENSBTAT00000056087, D3JEN6_BOVIN	DEL	FRAME_SHIFT
chr13	12831516	*	-CA	ENSBTAT00000025957, USP6NL	DEL	FRAME_SHIFT
chr13	12831519	*	-GCGC	ENSBTAT00000025957, USP6NL	DEL	FRAME_SHIFT
chr13	16392477	*	-TCTTCCT	ENSBTAT00000048699, ITIH5	DEL	FRAME_SHIFT
chr13	17745746	*	-C	ENSBTAT00000050712, ENSBTAG00000036222	DEL	FRAME_SHIFT
chr13	17745746	*	-C	ENSBTAT00000050251, ENSBTAG00000036222	DEL	FRAME_SHIFT
chr13	17764846	*	-GCTCACCGCACAC	ENSBTAT00000050251, ENSBTAG00000036222	DEL	FRAME_SHIFT
chr13	17768594	*	-A	ENSBTAT00000050251, ENSBTAG00000036222	DEL	FRAME_SHIFT
chr13	17776438	*	+AG	ENSBTAT00000050712, ENSBTAG00000036222	INS	FRAME_SHIFT
chr13	17776438	*	+AG	ENSBTAT00000050251, ENSBTAG00000036222	INS	FRAME_SHIFT
chr13	17879202	*	-TT	ENSBTAT00000048418, ENSBTAG00000034145	DEL	FRAME_SHIFT
chr13	17919519	*	+TATTTTTCTTCTTT	ENSBTAT00000022622, ANKRD26	INS	FRAME_SHIFT
chr13	17919519	*	+TATTTTTCTTCTTTTCTTTTTCTTCTTT	ENSBTAT00000022622, ANKRD26	INS	FRAME_SHIFT
chr13	23173417	*	-A	ENSBTAT00000061645, MLLT10	DEL	FRAME_SHIFT
chr13	24482164	*	-T	ENSBTAT00000062968, PTF1A	DEL	FRAME_SHIFT
chr13	28220553	*	+C	ENSBTAT00000064696, ENSBTAG00000047869	INS	FRAME_SHIFT
chr13	28222356	*	-AC	ENSBTAT00000064696, ENSBTAG00000047869	DEL	FRAME_SHIFT
chr13	29932275	*	+T	ENSBTAT00000063497, OLAH	INS	FRAME_SHIFT
chr13	30069634	*	-A	ENSBTAT00000032523, A7MB22_BOVIN	DEL	FRAME_SHIFT
chr13	31569291	*	-TC	ENSBTAT00000039417, CUBN	DEL	FRAME_SHIFT
chr13	31569297	*	+GT	ENSBTAT00000039417, CUBN	INS	FRAME_SHIFT
chr13	35341426	*	+G	ENSBTAT00000001595, K1462_BOVIN	INS	FRAME_SHIFT
chr13	38153210	*	-C	ENSBTAT00000011456, SLC6A9	DEL	FRAME_SHIFT
chr13	43836388	*	+G	ENSBTAT00000023853, ENSBTAG00000017938	INS	FRAME_SHIFT
chr13	44070511	*	+T	ENSBTAT00000024086, PGFS2_BOVIN	INS	FRAME_SHIFT
chr13	48579048	*	+C	ENSBTAT00000000073, LRRN4	INS	FRAME_SHIFT
chr13	52444067	*	+TGAGCCACTGTCCAAGTATCAGCATGGACAGTGGCTCATTACGGTGAGCAGC	ENSBTAT00000039338, SLC4A11	INS	FRAME_SHIFT
chr13	53929099	*	+ATGT	ENSBTAT00000027862, SIRPB1	INS	FRAME_SHIFT
chr13	53929102	*	-CTTT	ENSBTAT00000027862, SIRPB1	DEL	FRAME_SHIFT
chr13	53984921	*	-TG	ENSBTAT00000012873, SIRPB1	DEL	FRAME_SHIFT
chr13	53984925	*	+AC	ENSBTAT00000012873, SIRPB1	INS	FRAME_SHIFT
chr13	54009601	*	-CC	ENSBTAT00000015456, ENSBTAG00000011638	DEL	FRAME_SHIFT
chr13	54533969	*	+G	ENSBTAT00000052120, RTEL1	INS	FRAME_SHIFT
chr13	55046732	*	+T	ENSBTAT00000020676, OGFR	INS	FRAME_SHIFT
chr13	55046741	*	+G	ENSBTAT00000020676, OGFR	INS	FRAME_SHIFT
chr13	55046744	*	+T	ENSBTAT00000020676, OGFR	INS	FRAME_SHIFT
chr13	55046783	*	+A	ENSBTAT00000020676, OGFR	INS	FRAME_SHIFT
chr13	55451878	*	-C	ENSBTAT00000044837, E1BL67_BOVIN	DEL	FRAME_SHIFT
chr13	55451878	*	-C	ENSBTAT00000023135, E1BL67_BOVIN	DEL	FRAME_SHIFT
chr13	57186531	*	+A	ENSBTAT00000004704, A2I9A5_BOVIN	INS	FRAME_SHIFT
chr13	57861980	*	-T	ENSBTAT00000005773, SLMO2	DEL	FRAME_SHIFT
chr13	57862042	*	-C	ENSBTAT00000005773, SLMO2	DEL	FRAME_SHIFT
chr13	59075772	*	+C	ENSBTAT00000044681, PMEPA1	INS	FRAME_SHIFT
chr13	59075788	*	+C	ENSBTAT00000044681, PMEPA1	INS	FRAME_SHIFT
chr13	59075795	*	+C	ENSBTAT00000044681, PMEPA1	INS	FRAME_SHIFT
chr13	62929231	*	-G	ENSBTAT00000053654, BPIFB4	DEL	FRAME_SHIFT
chr13	63150712	*	-A	ENSBTAT00000015544, ENSBTAG00000011704	DEL	FRAME_SHIFT
chr13	63169693	*	-C	ENSBTAT00000026321, BPIFA2B	DEL	FRAME_SHIFT
chr13	70838666	*	+T	ENSBTAT00000061177, CHD6	INS	FRAME_SHIFT
chr13	72984533	*	+CTGTC	ENSBTAT00000014919, GTSFL_BOVIN	INS	FRAME_SHIFT
chr13	74460049	*	+C	ENSBTAT00000006835, Q3ZBQ3_BOVIN	INS	FRAME_SHIFT
chr13	74460049	*	+C	ENSBTAT00000063933, Q3ZBQ3_BOVIN	INS	FRAME_SHIFT
chr13	74497970	*	-TCTTAAGGATGGAGGG	ENSBTAT00000055067, WBP11	DEL	FRAME_SHIFT
chr13	74517393	*	-A	ENSBTAT00000064458, LOC100196900	DEL	FRAME_SHIFT
chr13	74802338	*	-CT	ENSBTAT00000019075, ENSBTAG00000038966	DEL	FRAME_SHIFT
chr13	75885699	*	-C	ENSBTAT00000055970, ENSBTAG00000027328	DEL	FRAME_SHIFT
chr13	75885699	*	-C	ENSBTAT00000039182, ENSBTAG00000027328	DEL	FRAME_SHIFT
chr13	75886412	*	+T	ENSBTAT00000039182, ENSBTAG00000027328	INS	FRAME_SHIFT
chr13	75886448	*	+T	ENSBTAT00000039182, ENSBTAG00000027328	INS	FRAME_SHIFT
chr13	75940350	*	+T	ENSBTAT00000065334, ENSBTAG00000009675	INS	FRAME_SHIFT
chr13	80429035	*	-T	ENSBTAT00000043163, ENSBTAG00000030564	DEL	FRAME_SHIFT
chr13	84229620	*	-C	ENSBTAT00000055828, ENSBTAG00000038057	DEL	FRAME_SHIFT
chr13	84230470	*	-A	ENSBTAT00000055828, ENSBTAG00000038057	DEL	FRAME_SHIFT
chr14	1839841	*	+T	ENSBTAT00000012942, ENSBTAG00000009816	INS	FRAME_SHIFT
chr14	2235631	*	-GGGC	ENSBTAT00000026467, MAPK15	DEL	FRAME_SHIFT
chr14	2774242	*	-T	ENSBTAT00000052145, ENSBTAG00000037824	DEL	FRAME_SHIFT
chr14	2774242	*	-T	ENSBTAT00000006034, ENSBTAG00000037824	DEL	FRAME_SHIFT
chr14	2774832	*	-A	ENSBTAT00000052145, ENSBTAG00000037824	DEL	FRAME_SHIFT
chr14	2774832	*	-A	ENSBTAT00000006034, ENSBTAG00000037824	DEL	FRAME_SHIFT
chr14	2775449	*	-C	ENSBTAT00000006034, ENSBTAG00000037824	DEL	FRAME_SHIFT
chr14	3563546	*	+TTCA	ENSBTAT00000065374, ENSBTAG00000046166	INS	FRAME_SHIFT
chr14	5266748	*	-GC	ENSBTAT00000065866, COL22A1	DEL	FRAME_SHIFT
chr14	5266748	*	-GC	ENSBTAT00000031507, COL22A1	DEL	FRAME_SHIFT
chr14	5266753	*	+CC	ENSBTAT00000065866, COL22A1	INS	FRAME_SHIFT
chr14	5266753	*	+CC	ENSBTAT00000031507, COL22A1	INS	FRAME_SHIFT
chr14	5329549	*	-A	ENSBTAT00000065866, COL22A1	DEL	FRAME_SHIFT
chr14	17498702	*	+C	ENSBTAT00000025707, FER1L6	INS	FRAME_SHIFT
chr14	17790851	*	-T	ENSBTAT00000007336, ANXA13	DEL	FRAME_SHIFT
chr14	21173251	*	-T	ENSBTAT00000054380, MCM4	DEL	FRAME_SHIFT
chr14	21174209	*	+TTCTTTGC	ENSBTAT00000054380, MCM4	INS	FRAME_SHIFT
chr14	21174211	*	+TTTG	ENSBTAT00000054380, MCM4	INS	FRAME_SHIFT
chr14	23995407	*	+A	ENSBTAT00000014879, RP1	INS	FRAME_SHIFT
chr14	23997821	*	-G	ENSBTAT00000014879, RP1	DEL	FRAME_SHIFT
chr14	28044889	*	-GTGGCCCCGAGCCTGC	ENSBTAT00000026607, CHD7	DEL	FRAME_SHIFT
chr14	32536025	*	+A	ENSBTAT00000054362, ENSBTAG00000040021	INS	FRAME_SHIFT
chr14	32895290	*	+T	ENSBTAT00000008802, VCPIP1	INS	FRAME_SHIFT
chr14	38761897	*	+T	ENSBTAT00000064930, ENSBTAG00000047607	INS	FRAME_SHIFT
chr14	38761892	*	-TTTTT	ENSBTAT00000064930, ENSBTAG00000047607	DEL	FRAME_SHIFT
chr14	38761890	*	-TTTTTTT	ENSBTAT00000064930, ENSBTAG00000047607	DEL	FRAME_SHIFT
chr14	38761906	*	+C	ENSBTAT00000064930, ENSBTAG00000047607	INS	FRAME_SHIFT
chr14	42270030	*	+T	ENSBTAT00000066279, ENSBTAG00000047355	INS	FRAME_SHIFT
chr14	45039174	*	+T	ENSBTAT00000046579, ENSBTAG00000032812	INS	FRAME_SHIFT
chr14	64301046	*	+TTAATGATAATAACTGCTATGTAGAAAATAAAGTACTGATAGTAATAAATAGGTAATTTTTGAAATCCTCTAGGCAATGAGGAAAT	ENSBTAT00000028262, UBR5	INS	FRAME_SHIFT
chr14	64302775	*	-T	ENSBTAT00000028262, UBR5	DEL	FRAME_SHIFT
chr14	68339217	*	+T	ENSBTAT00000024232, NIPAL2	INS	FRAME_SHIFT
chr14	77384388	*	-G	ENSBTAT00000065964, ENSBTAG00000048317	DEL	FRAME_SHIFT
chr14	78605511	*	+T	ENSBTAT00000040008, ENSBTAG00000032233	INS	FRAME_SHIFT
chr14	78605554	*	+C	ENSBTAT00000040008, ENSBTAG00000032233	INS	FRAME_SHIFT
chr14	79297713	*	+A	ENSBTAT00000003695, ENSBTAG00000002851	INS	FRAME_SHIFT
chr14	79819654	*	+T	ENSBTAT00000004335, LRRCC1	INS	FRAME_SHIFT
chr14	79819658	*	-C	ENSBTAT00000004335, LRRCC1	DEL	FRAME_SHIFT
chr14	83572987	*	+A	ENSBTAT00000061330, TAF2	INS	FRAME_SHIFT
chr14	84390702	*	-TC	ENSBTAT00000061037, SNTB1	DEL	FRAME_SHIFT
chr15	182772	*	+T	ENSBTAT00000064530, ENSBTAG00000046228	INS	FRAME_SHIFT
chr15	577870	*	-T	ENSBTAT00000056863, OR9G1	DEL	FRAME_SHIFT
chr15	968513	*	-G	ENSBTAT00000022357, ENSBTAG00000016807	DEL	FRAME_SHIFT
chr15	968626	*	-C	ENSBTAT00000022357, ENSBTAG00000016807	DEL	FRAME_SHIFT
chr15	969099	*	+G	ENSBTAT00000022357, ENSBTAG00000016807	INS	FRAME_SHIFT
chr15	1175331	*	-TGTGGCCATCTGTAAGCCCCTTCGATACATAACCCTCATGAGCCATCGAGTC	ENSBTAT00000014564, ENSBTAG00000047007	DEL	FRAME_SHIFT
chr15	1208638	*	+T	ENSBTAT00000029156, ENSBTAG00000036025	INS	FRAME_SHIFT
chr15	1296082	*	-C	ENSBTAT00000065327, ENSBTAG00000046387	DEL	FRAME_SHIFT
chr15	6026081	*	+TG	ENSBTAT00000013124, MMP10	INS	FRAME_SHIFT
chr15	7059187	*	-CC	ENSBTAT00000026683, KIAA1377	DEL	FRAME_SHIFT
chr15	7059190	*	-GG	ENSBTAT00000026683, KIAA1377	DEL	FRAME_SHIFT
chr15	8922452	*	+T	ENSBTAT00000049290, A1XED0_BOVIN	INS	FRAME_SHIFT
chr15	13611774	*	-AA	ENSBTAT00000049181, E1BM22_BOVIN	DEL	FRAME_SHIFT
chr15	18460299	*	+T	ENSBTAT00000010864, EXPH5	INS	FRAME_SHIFT
chr15	18461010	*	-CA	ENSBTAT00000010864, EXPH5	DEL	FRAME_SHIFT
chr15	18461013	*	+GG	ENSBTAT00000010864, EXPH5	INS	FRAME_SHIFT
chr15	20577974	*	-CA	ENSBTAT00000065668, ENSBTAG00000047384	DEL	FRAME_SHIFT
chr15	22697173	*	-T	ENSBTAT00000014176, F1N690_BOVIN	DEL	FRAME_SHIFT
chr15	31240028	*	+T	ENSBTAT00000012396, TRIM29	INS	FRAME_SHIFT
chr15	31240030	*	+C	ENSBTAT00000012396, TRIM29	INS	FRAME_SHIFT
chr15	31240035	*	+C	ENSBTAT00000012396, TRIM29	INS	FRAME_SHIFT
chr15	31240057	*	+C	ENSBTAT00000012396, TRIM29	INS	FRAME_SHIFT
chr15	31240065	*	-G	ENSBTAT00000012396, TRIM29	DEL	FRAME_SHIFT
chr15	34111658	*	+A	ENSBTAT00000018593, C11orf63	INS	FRAME_SHIFT
chr15	34111657	*	-A	ENSBTAT00000018593, C11orf63	DEL	FRAME_SHIFT
chr15	45198743	*	-C	ENSBTAT00000056373, ENSBTAG00000040252	DEL	FRAME_SHIFT
chr15	45214834	*	+C	ENSBTAT00000055304, F1MI23_BOVIN	INS	FRAME_SHIFT
chr15	45478554	*	+ACAC	ENSBTAT00000052497, ENSBTAG00000037384	INS	FRAME_SHIFT
chr15	45478556	*	-GTGG	ENSBTAT00000052497, ENSBTAG00000037384	DEL	FRAME_SHIFT
chr15	45574581	*	+A	ENSBTAT00000052633, ENSBTAG00000038598	INS	FRAME_SHIFT
chr15	46302703	*	-T	ENSBTAT00000002954, NLRP14	DEL	FRAME_SHIFT
chr15	46545888	*	-A	ENSBTAT00000038978, ENSBTAG00000032050	DEL	FRAME_SHIFT
chr15	46546495	*	-G	ENSBTAT00000038978, ENSBTAG00000032050	DEL	FRAME_SHIFT
chr15	46603339	*	-CA	ENSBTAT00000052569, ENSBTAG00000037603	DEL	FRAME_SHIFT
chr15	46603342	*	+GC	ENSBTAT00000052569, ENSBTAG00000037603	INS	FRAME_SHIFT
chr15	46603901	*	-AAGGC	ENSBTAT00000052569, ENSBTAG00000037603	DEL	FRAME_SHIFT
chr15	46692955	*	-T	ENSBTAT00000020969, ENSBTAG00000015791	DEL	FRAME_SHIFT
chr15	46693341	*	+A	ENSBTAT00000020969, ENSBTAG00000015791	INS	FRAME_SHIFT
chr15	46693570	*	-AACT	ENSBTAT00000020969, ENSBTAG00000015791	DEL	FRAME_SHIFT
chr15	46693572	*	-CTAT	ENSBTAT00000020969, ENSBTAG00000015791	DEL	FRAME_SHIFT
chr15	46720008	*	-G	ENSBTAT00000028185, ENSBTAG00000021147	DEL	FRAME_SHIFT
chr15	46720407	*	-G	ENSBTAT00000028185, ENSBTAG00000021147	DEL	FRAME_SHIFT
chr15	46853111	*	+GG	ENSBTAT00000005825, ENSBTAG00000004443	INS	FRAME_SHIFT
chr15	46853114	*	+A	ENSBTAT00000005825, ENSBTAG00000004443	INS	FRAME_SHIFT
chr15	46856496	*	-CT	ENSBTAT00000055625, ENSBTAG00000037937	DEL	FRAME_SHIFT
chr15	47440300	*	-AGCATAGTACTATACTAGA	ENSBTAT00000064434, ENSBTAG00000047176	DEL	FRAME_SHIFT
chr15	47734795	*	-AGAAG	ENSBTAT00000031447, OR56A4	DEL	FRAME_SHIFT
chr15	47784034	*	+T	ENSBTAT00000055994, E1BBY8_BOVIN	INS	FRAME_SHIFT
chr15	47784034	*	+TT	ENSBTAT00000055994, E1BBY8_BOVIN	INS	FRAME_SHIFT
chr15	47797461	*	-AAAAAAA	ENSBTAT00000000127, ENSBTAG00000000118	DEL	FRAME_SHIFT
chr15	47797467	*	-A	ENSBTAT00000000127, ENSBTAG00000000118	DEL	FRAME_SHIFT
chr15	47797464	*	-AAAA	ENSBTAT00000000127, ENSBTAG00000000118	DEL	FRAME_SHIFT
chr15	48061067	*	-A	ENSBTAT00000028824, ENSBTAG00000032255	DEL	FRAME_SHIFT
chr15	48132944	*	-G	ENSBTAT00000040222, ENSBTAG00000027889	DEL	FRAME_SHIFT
chr15	48332437	*	+CT	ENSBTAT00000040169, ENSBTAG00000005609	INS	FRAME_SHIFT
chr15	48429395	*	-TAAC	ENSBTAT00000005971, Q3MJK3_BOVIN	DEL	FRAME_SHIFT
chr15	48429396	*	-A	ENSBTAT00000005971, Q3MJK3_BOVIN	DEL	FRAME_SHIFT
chr15	48429400	*	+A	ENSBTAT00000005971, Q3MJK3_BOVIN	INS	FRAME_SHIFT
chr15	48429402	*	+TATT	ENSBTAT00000005971, Q3MJK3_BOVIN	INS	FRAME_SHIFT
chr15	48673470	*	-G	ENSBTAT00000063591, ENSBTAG00000048166	DEL	FRAME_SHIFT
chr15	48783343	*	-CA	ENSBTAT00000052083, ENSBTAG00000039214	DEL	FRAME_SHIFT
chr15	48812587	*	-T	ENSBTAT00000039825, OR51I2	DEL	FRAME_SHIFT
chr15	48853043	*	-C	ENSBTAT00000053488, ENSBTAG00000039088	DEL	FRAME_SHIFT
chr15	49099150	*	-AAAA	ENSBTAT00000027553, ENSBTAG00000020673	DEL	FRAME_SHIFT
chr15	49110712	*	-ATGTACAT	ENSBTAT00000064520, ENSBTAG00000047477	DEL	FRAME_SHIFT
chr15	49201880	*	-CTTC	ENSBTAT00000063523, ENSBTAG00000046983	DEL	FRAME_SHIFT
chr15	49243423	*	+CT	ENSBTAT00000063738, ENSBTAG00000048300	INS	FRAME_SHIFT
chr15	49243427	*	-AAGAT	ENSBTAT00000063738, ENSBTAG00000048300	DEL	FRAME_SHIFT
chr15	49243432	*	+CCTTC	ENSBTAT00000063738, ENSBTAG00000048300	INS	FRAME_SHIFT
chr15	49355625	*	+GAACATTT	ENSBTAT00000064832, ENSBTAG00000046829	INS	FRAME_SHIFT
chr15	49373130	*	+T	ENSBTAT00000057031, OR51C1P	INS	FRAME_SHIFT
chr15	49528586	*	-GG	ENSBTAT00000052925, F1MGV8_BOVIN	DEL	FRAME_SHIFT
chr15	49571489	*	-TATCTGCTTGGTTTTCACACTA	ENSBTAT00000063502, ENSBTAG00000047178	DEL	FRAME_SHIFT
chr15	49571975	*	-G	ENSBTAT00000063502, ENSBTAG00000047178	DEL	FRAME_SHIFT
chr15	49604452	*	+A	ENSBTAT00000054047, OR51T1	INS	FRAME_SHIFT
chr15	49771687	*	-A	ENSBTAT00000053657, ENSBTAG00000038161	DEL	FRAME_SHIFT
chr15	49789655	*	-G	ENSBTAT00000066312, ENSBTAG00000045612	DEL	FRAME_SHIFT
chr15	49833995	*	+A	ENSBTAT00000065689, OR52E2	INS	FRAME_SHIFT
chr15	49834197	*	+A	ENSBTAT00000065689, OR52E2	INS	FRAME_SHIFT
chr15	49852261	*	+A	ENSBTAT00000056374, ENSBTAG00000040408	INS	FRAME_SHIFT
chr15	49923020	*	-A	ENSBTAT00000026692, ENSBTAG00000035006	DEL	FRAME_SHIFT
chr15	50008150	*	-TCTA	ENSBTAT00000053127, ENSBTAG00000008312	DEL	FRAME_SHIFT
chr15	50008669	*	+G	ENSBTAT00000053127, ENSBTAG00000008312	INS	FRAME_SHIFT
chr15	50041090	*	-G	ENSBTAT00000049497, ENSBTAG00000047960	DEL	FRAME_SHIFT
chr15	50041256	*	+A	ENSBTAT00000049497, ENSBTAG00000047960	INS	FRAME_SHIFT
chr15	50041260	*	+A	ENSBTAT00000049497, ENSBTAG00000047960	INS	FRAME_SHIFT
chr15	50041261	*	-CC	ENSBTAT00000049497, ENSBTAG00000047960	DEL	FRAME_SHIFT
chr15	50041484	*	-A	ENSBTAT00000049497, ENSBTAG00000047960	DEL	FRAME_SHIFT
chr15	50404435	*	-C	ENSBTAT00000063769, ENSBTAG00000047021	DEL	FRAME_SHIFT
chr15	50510617	*	-G	ENSBTAT00000030210, E1BDG1_BOVIN	DEL	FRAME_SHIFT
chr15	50536912	*	+A	ENSBTAT00000047554, ENSBTAG00000038075	INS	FRAME_SHIFT
chr15	50817423	*	-TTGTATGC	ENSBTAT00000063969, ENSBTAG00000047498	DEL	FRAME_SHIFT
chr15	51072288	*	-GGCCACAGCTATGTGC	ENSBTAT00000055288, ENSBTAG00000047803	DEL	FRAME_SHIFT
chr15	51317240	*	-A	ENSBTAT00000006667, OR52K2	DEL	FRAME_SHIFT
chr15	51347191	*	-CC	ENSBTAT00000057034, ENSBTAG00000039467	DEL	FRAME_SHIFT
chr15	51483410	*	+G	ENSBTAT00000063640, RO52_BOVIN	INS	FRAME_SHIFT
chr15	51483410	*	+G	ENSBTAT00000018459, RO52_BOVIN	INS	FRAME_SHIFT
chr15	52193936	*	+C	ENSBTAT00000061577, CHRNA10	INS	FRAME_SHIFT
chr15	52219359	*	-GT	ENSBTAT00000018601, Q95KW1_BOVIN	DEL	FRAME_SHIFT
chr15	52219364	*	+TC	ENSBTAT00000018601, Q95KW1_BOVIN	INS	FRAME_SHIFT
chr15	52258178	*	-TTCACTT	ENSBTAT00000039858, ART5	DEL	FRAME_SHIFT
chr15	52258373	*	-TC	ENSBTAT00000039858, ART5	DEL	FRAME_SHIFT
chr15	52258381	*	-AGCA	ENSBTAT00000039858, ART5	DEL	FRAME_SHIFT
chr15	52258387	*	+GAGT	ENSBTAT00000039858, ART5	INS	FRAME_SHIFT
chr15	52258462	*	-TA	ENSBTAT00000039858, ART5	DEL	FRAME_SHIFT
chr15	52270349	*	-A	ENSBTAT00000038298, ART5	DEL	FRAME_SHIFT
chr15	52270349	*	-A	ENSBTAT00000012265, ART5	DEL	FRAME_SHIFT
chr15	52270352	*	-G	ENSBTAT00000038298, ART5	DEL	FRAME_SHIFT
chr15	52270352	*	-G	ENSBTAT00000012265, ART5	DEL	FRAME_SHIFT
chr15	52320733	*	-C	ENSBTAT00000015344, TRPC2	DEL	FRAME_SHIFT
chr15	54219689	*	+G	ENSBTAT00000006918, UCP3	INS	FRAME_SHIFT
chr15	54219711	*	+G	ENSBTAT00000006918, UCP3	INS	FRAME_SHIFT
chr15	54449622	*	-T	ENSBTAT00000008644, P4HA3_BOVIN	DEL	FRAME_SHIFT
chr15	55851525	*	-T	ENSBTAT00000000829, ENSBTAG00000000628	DEL	FRAME_SHIFT
chr15	55851899	*	-T	ENSBTAT00000000829, ENSBTAG00000000628	DEL	FRAME_SHIFT
chr15	55852204	*	+TCTAT	ENSBTAT00000000829, ENSBTAG00000000628	INS	FRAME_SHIFT
chr15	56880493	*	+G	ENSBTAT00000039398, F1MMP9_BOVIN	INS	FRAME_SHIFT
chr15	56881075	*	+C	ENSBTAT00000039398, F1MMP9_BOVIN	INS	FRAME_SHIFT
chr15	56884268	*	+C	ENSBTAT00000039398, F1MMP9_BOVIN	INS	FRAME_SHIFT
chr15	64476390	*	+T	ENSBTAT00000029070, DEPDC7	INS	FRAME_SHIFT
chr15	75879274	*	-ACTT	ENSBTAT00000044202, TP53I11	DEL	FRAME_SHIFT
chr15	76134507	*	-A	ENSBTAT00000044198, ENSBTAG00000031210	DEL	FRAME_SHIFT
chr15	79136430	*	-CT	ENSBTAT00000007767, ENSBTAG00000005914	DEL	FRAME_SHIFT
chr15	79136435	*	+CG	ENSBTAT00000007767, ENSBTAG00000005914	INS	FRAME_SHIFT
chr15	79166918	*	+G	ENSBTAT00000043921, ENSBTAG00000031025	INS	FRAME_SHIFT
chr15	79260727	*	-T	ENSBTAT00000016656, ENSBTAG00000024788	DEL	FRAME_SHIFT
chr15	79267284	*	+TG	ENSBTAT00000034514, E1B8P5_BOVIN	INS	FRAME_SHIFT
chr15	79277202	*	-G	ENSBTAT00000034415, OR4C3	DEL	FRAME_SHIFT
chr15	79573394	*	-TTTA	ENSBTAT00000039086, F1MMM3_BOVIN	DEL	FRAME_SHIFT
chr15	79604226	*	-CCACTTGT	ENSBTAT00000063970, ENSBTAG00000046923	DEL	FRAME_SHIFT
chr15	79698027	*	+TTCTTTAATTT	ENSBTAT00000007393, ENSBTAG00000040425	INS	FRAME_SHIFT
chr15	79980202	*	+AA	ENSBTAT00000054253, ENSBTAG00000039331	INS	FRAME_SHIFT
chr15	79980202	*	+A	ENSBTAT00000054253, ENSBTAG00000039331	INS	FRAME_SHIFT
chr15	80289304	*	+ATGAA	ENSBTAT00000055982, ENSBTAG00000001291	INS	FRAME_SHIFT
chr15	80338164	*	-TGTG	ENSBTAT00000053149, ENSBTAG00000037878	DEL	FRAME_SHIFT
chr15	80421234	*	-G	ENSBTAT00000004342, E1BEI8_BOVIN	DEL	FRAME_SHIFT
chr15	80556126	*	-TCTGT	ENSBTAT00000031053, ENSBTAG00000022858	DEL	FRAME_SHIFT
chr15	80602904	*	+C	ENSBTAT00000033864, ENSBTAG00000024423	INS	FRAME_SHIFT
chr15	80602945	*	-GGAGCCTGCAGTTCAG	ENSBTAT00000033864, ENSBTAG00000024423	DEL	FRAME_SHIFT
chr15	80686805	*	+AG	ENSBTAT00000055245, ENSBTAG00000039348	INS	FRAME_SHIFT
chr15	80686811	*	-TTTA	ENSBTAT00000055245, ENSBTAG00000039348	DEL	FRAME_SHIFT
chr15	80933373	*	-T	ENSBTAT00000052181, ENSBTAG00000038479	DEL	FRAME_SHIFT
chr15	80933546	*	+A	ENSBTAT00000052181, ENSBTAG00000038479	INS	FRAME_SHIFT
chr15	80949302	*	+AA	ENSBTAT00000052501, ENSBTAG00000039110	INS	FRAME_SHIFT
chr15	80949303	*	-TC	ENSBTAT00000052501, ENSBTAG00000039110	DEL	FRAME_SHIFT
chr15	81067671	*	-AT	ENSBTAT00000053583, OR5M11	DEL	FRAME_SHIFT
chr15	81133485	*	+T	ENSBTAT00000008421, OR5AR1	INS	FRAME_SHIFT
chr15	81170239	*	+AC	ENSBTAT00000053869, ENSBTAG00000039801	INS	FRAME_SHIFT
chr15	81170239	*	+ACAC	ENSBTAT00000053869, ENSBTAG00000039801	INS	FRAME_SHIFT
chr15	81173669	*	+GATAA	ENSBTAT00000053409, ENSBTAG00000036131	INS	FRAME_SHIFT
chr15	81220250	*	+GGGGG	ENSBTAT00000055990, ENSBTAG00000040463	INS	FRAME_SHIFT
chr15	81269935	*	-GG	ENSBTAT00000057294, ENSBTAG00000037928	DEL	FRAME_SHIFT
chr15	81300182	*	+A	ENSBTAT00000057372, ENSBTAG00000038539	INS	FRAME_SHIFT
chr15	81870614	*	-GC	ENSBTAT00000014055, A4IFU0_BOVIN	DEL	FRAME_SHIFT
chr15	81870617	*	+TT	ENSBTAT00000014055, A4IFU0_BOVIN	INS	FRAME_SHIFT
chr15	81872467	*	+A	ENSBTAT00000014055, A4IFU0_BOVIN	INS	FRAME_SHIFT
chr15	81872472	*	-T	ENSBTAT00000014055, A4IFU0_BOVIN	DEL	FRAME_SHIFT
chr15	81924822	*	+A	ENSBTAT00000002601, A4IFV9_BOVIN	INS	FRAME_SHIFT
chr15	81924825	*	+G	ENSBTAT00000002601, A4IFV9_BOVIN	INS	FRAME_SHIFT
chr15	81924826	*	-TT	ENSBTAT00000002601, A4IFV9_BOVIN	DEL	FRAME_SHIFT
chr15	82740508	*	+GACTGTCAGGT	ENSBTAT00000052324, ENSBTAG00000040150	INS	FRAME_SHIFT
chr15	82741230	*	-T	ENSBTAT00000052324, ENSBTAG00000040150	DEL	FRAME_SHIFT
chr15	82755028	*	-GGAG	ENSBTAT00000028496, OR10Q1	DEL	FRAME_SHIFT
chr15	82755035	*	-CTGGAGTTCTGGG	ENSBTAT00000028496, OR10Q1	DEL	FRAME_SHIFT
chr15	82755050	*	-GGTGGTGA	ENSBTAT00000028496, OR10Q1	DEL	FRAME_SHIFT
chr15	82827918	*	-GC	ENSBTAT00000057187, ENSBTAG00000039306	DEL	FRAME_SHIFT
chr15	82890953	*	-GC	ENSBTAT00000052401, ENSBTAG00000037853	DEL	FRAME_SHIFT
chr15	82971037	*	-AGCTGAGGAG	ENSBTAT00000056278, ENSBTAG00000039592	DEL	FRAME_SHIFT
chr15	83006022	*	+A	ENSBTAT00000017951, ENSBTAG00000013503	INS	FRAME_SHIFT
chr15	83477821	*	-C	ENSBTAT00000038874, GLYAL_BOVIN	DEL	FRAME_SHIFT
chr15	83604436	*	-T	ENSBTAT00000003182, FAM111A	DEL	FRAME_SHIFT
chr15	83605683	*	-A	ENSBTAT00000003182, FAM111A	DEL	FRAME_SHIFT
chr15	84089171	*	-CT	ENSBTAT00000003469, ENSBTAG00000033506	DEL	FRAME_SHIFT
chr15	84089174	*	+GC	ENSBTAT00000003469, ENSBTAG00000033506	INS	FRAME_SHIFT
chr15	84487974	*	+A	ENSBTAT00000026770, MS4A3	INS	FRAME_SHIFT
chr15	84572985	*	+A	ENSBTAT00000043726, MS4A14	INS	FRAME_SHIFT
chr16	2117563	*	-CC	ENSBTAT00000036972, ENSBTAG00000026068	DEL	FRAME_SHIFT
chr16	2117563	*	-CCTC	ENSBTAT00000036972, ENSBTAG00000026068	DEL	FRAME_SHIFT
chr16	2117568	*	+G	ENSBTAT00000036972, ENSBTAG00000026068	INS	FRAME_SHIFT
chr16	2117569	*	+AT	ENSBTAT00000036972, ENSBTAG00000026068	INS	FRAME_SHIFT
chr16	2117632	*	-AG	ENSBTAT00000036972, ENSBTAG00000026068	DEL	FRAME_SHIFT
chr16	2121127	*	-G	ENSBTAT00000049024, ENSBTAG00000034611	DEL	FRAME_SHIFT
chr16	4231454	*	+C	ENSBTAT00000013769, EIF2D_BOVIN	INS	FRAME_SHIFT
chr16	5275094	*	+C	ENSBTAT00000063039, E3UM65_BOVIN	INS	FRAME_SHIFT
chr16	5275094	*	+C	ENSBTAT00000047564, E3UM65_BOVIN	INS	FRAME_SHIFT
chr16	5937897	*	+A	ENSBTAT00000025846, ENSBTAG00000024647	INS	FRAME_SHIFT
chr16	5942521	*	-C	ENSBTAT00000025846, ENSBTAG00000024647	DEL	FRAME_SHIFT
chr16	5958732	*	-G	ENSBTAT00000025846, ENSBTAG00000024647	DEL	FRAME_SHIFT
chr16	8242091	*	+A	ENSBTAT00000055820, ENSBTAG00000025113	INS	FRAME_SHIFT
chr16	12544497	*	-G	ENSBTAT00000016962, ENSBTAG00000012765	DEL	FRAME_SHIFT
chr16	12544981	*	-C	ENSBTAT00000016962, ENSBTAG00000012765	DEL	FRAME_SHIFT
chr16	24963835	*	+A	ENSBTAT00000008440, MOSC2_BOVIN	INS	FRAME_SHIFT
chr16	30021277	*	+A	ENSBTAT00000047257, LIN9	INS	FRAME_SHIFT
chr16	30490347	*	-TT	ENSBTAT00000025755, ITPKB	DEL	FRAME_SHIFT
chr16	32400930	*	+A	ENSBTAT00000065948, KIF26B	INS	FRAME_SHIFT
chr16	32400930	*	+A	ENSBTAT00000047614, KIF26B	INS	FRAME_SHIFT
chr16	37794784	*	-CTCA	ENSBTAT00000046902, NDK7_BOVIN	DEL	FRAME_SHIFT
chr16	38073516	*	+T	ENSBTAT00000046869, A6QPF9_BOVIN	INS	FRAME_SHIFT
chr16	38158665	*	-T	ENSBTAT00000046865, F1N4U9_BOVIN	DEL	FRAME_SHIFT
chr16	38185980	*	+T	ENSBTAT00000064677, LYAM2_BOVIN	INS	FRAME_SHIFT
chr16	38185980	*	+TT	ENSBTAT00000064677, LYAM2_BOVIN	INS	FRAME_SHIFT
chr16	38257287	*	-T	ENSBTAT00000019683, C1orf112	DEL	FRAME_SHIFT
chr16	38257345	*	-C	ENSBTAT00000019683, C1orf112	DEL	FRAME_SHIFT
chr16	42616595	*	+T	ENSBTAT00000002658, PLOD1	INS	FRAME_SHIFT
chr16	48063684	*	-G	ENSBTAT00000010688, CHD5	DEL	FRAME_SHIFT
chr16	49264119	*	+T	ENSBTAT00000063131, ENSBTAG00000048267	INS	FRAME_SHIFT
chr16	49264124	*	+T	ENSBTAT00000063131, ENSBTAG00000048267	INS	FRAME_SHIFT
chr16	49264135	*	+T	ENSBTAT00000063131, ENSBTAG00000048267	INS	FRAME_SHIFT
chr16	52578640	*	+G	ENSBTAT00000010020, A7E3Q0_BOVIN	INS	FRAME_SHIFT
chr16	52879257	*	-T	ENSBTAT00000044658, ZBTB17	DEL	FRAME_SHIFT
chr16	52949224	*	+AAAT	ENSBTAT00000024930, SPEN	INS	FRAME_SHIFT
chr16	52949224	*	+AAAT	ENSBTAT00000061139, SPEN	INS	FRAME_SHIFT
chr16	53417859	*	-T	ENSBTAT00000003121, FHAD1	DEL	FRAME_SHIFT
chr16	55494332	*	-GA	ENSBTAT00000040284, Q58CY5_BOVIN	DEL	FRAME_SHIFT
chr16	55494338	*	-G	ENSBTAT00000040284, Q58CY5_BOVIN	DEL	FRAME_SHIFT
chr16	55494378	*	-CATCA	ENSBTAT00000040284, Q58CY5_BOVIN	DEL	FRAME_SHIFT
chr16	55494385	*	+C	ENSBTAT00000040284, Q58CY5_BOVIN	INS	FRAME_SHIFT
chr16	55494387	*	-A	ENSBTAT00000040284, Q58CY5_BOVIN	DEL	FRAME_SHIFT
chr16	55566932	*	+G	ENSBTAT00000026550, ENSBTAG00000019931	INS	FRAME_SHIFT
chr16	55791391	*	+T	ENSBTAT00000016441, ENSBTAG00000012389	INS	FRAME_SHIFT
chr16	55898210	*	+G	ENSBTAT00000020712, ENSBTAG00000031507	INS	FRAME_SHIFT
chr16	56048300	*	-TT	ENSBTAT00000020723, ENSBTAG00000015600	DEL	FRAME_SHIFT
chr16	56048303	*	+AG	ENSBTAT00000020723, ENSBTAG00000015600	INS	FRAME_SHIFT
chr16	63551842	*	+G	ENSBTAT00000008215, KIAA1614	INS	FRAME_SHIFT
chr16	63551843	*	+AT	ENSBTAT00000008215, KIAA1614	INS	FRAME_SHIFT
chr16	68879656	*	-ACCCACCACCCCAAGGAGCCTGA	ENSBTAT00000015839, PRG4	DEL	FRAME_SHIFT
chr16	68879664	*	-CC	ENSBTAT00000064366, PRG4	DEL	FRAME_SHIFT
chr16	68879664	*	-CC	ENSBTAT00000015839, PRG4	DEL	FRAME_SHIFT
chr16	70890153	*	-CGAGGGC	ENSBTAT00000019957, ETBR2_BOVIN	DEL	FRAME_SHIFT
chr16	70890161	*	-GCGGC	ENSBTAT00000019957, ETBR2_BOVIN	DEL	FRAME_SHIFT
chr16	71126660	*	-G	ENSBTAT00000065424, PPP1R12B	DEL	FRAME_SHIFT
chr16	71127496	*	-C	ENSBTAT00000065424, PPP1R12B	DEL	FRAME_SHIFT
chr16	71130473	*	-TGAGCAGCCCCGCCCTCTGTGTAACC	ENSBTAT00000065424, PPP1R12B	DEL	FRAME_SHIFT
chr16	73074509	*	-G	ENSBTAT00000063998, TM206_BOVIN	DEL	FRAME_SHIFT
chr16	77908078	*	-A	ENSBTAT00000000078, CFHR5	DEL	FRAME_SHIFT
chr16	77908419	*	-A	ENSBTAT00000000078, CFHR5	DEL	FRAME_SHIFT
chr16	78257225	*	+G	ENSBTAT00000033880, CRB1	INS	FRAME_SHIFT
chr16	79531380	*	-AAGC	ENSBTAT00000013320, PTPRC	DEL	FRAME_SHIFT
chr16	79531387	*	+GAAA	ENSBTAT00000013320, PTPRC	INS	FRAME_SHIFT
chr16	81376512	*	-TGGAG	ENSBTAT00000065142, C1orf106	DEL	FRAME_SHIFT
chr16	81376512	*	-TGGAG	ENSBTAT00000065906, C1orf106	DEL	FRAME_SHIFT
chr16	81376519	*	+CTCCA	ENSBTAT00000065142, C1orf106	INS	FRAME_SHIFT
chr16	81376519	*	+CTCCA	ENSBTAT00000065906, C1orf106	INS	FRAME_SHIFT
chr16	81376521	*	+C	ENSBTAT00000065142, C1orf106	INS	FRAME_SHIFT
chr16	81376521	*	+C	ENSBTAT00000065906, C1orf106	INS	FRAME_SHIFT
chr16	81615258	*	+A	ENSBTAT00000063192, IGFN1	INS	FRAME_SHIFT
chr16	81624152	*	+GG	ENSBTAT00000063192, IGFN1	INS	FRAME_SHIFT
chr16	81631606	*	+G	ENSBTAT00000063192, IGFN1	INS	FRAME_SHIFT
chr16	81632537	*	-G	ENSBTAT00000063192, IGFN1	DEL	FRAME_SHIFT
chr17	59681	*	+A	ENSBTAT00000064742, ENSBTAG00000048129	INS	FRAME_SHIFT
chr17	2656381	*	-C	ENSBTAT00000022813, Q32LM9_BOVIN	DEL	FRAME_SHIFT
chr17	8886489	*	+A	ENSBTAT00000063250, ENSBTAG00000045580	INS	FRAME_SHIFT
chr17	17505376	*	-T	ENSBTAT00000018612, ELMD2_BOVIN	DEL	FRAME_SHIFT
chr17	17532295	*	+T	ENSBTAT00000048576, ENSBTAG00000034281	INS	FRAME_SHIFT
chr17	17532295	*	+T	ENSBTAT00000048574, ENSBTAG00000034281	INS	FRAME_SHIFT
chr17	18332677	*	-T	ENSBTAT00000029028, MGST2_BOVIN	DEL	FRAME_SHIFT
chr17	19740185	*	-A	ENSBTAT00000048221, B6D7N9_BOVIN	DEL	FRAME_SHIFT
chr17	24458365	*	-T	ENSBTAT00000052136, ENSBTAG00000009722	DEL	FRAME_SHIFT
chr17	25033775	*	-C	ENSBTAT00000049474, ENSBTAG00000035012	DEL	FRAME_SHIFT
chr17	25033779	*	+G	ENSBTAT00000049474, ENSBTAG00000035012	INS	FRAME_SHIFT
chr17	30228854	*	+A	ENSBTAT00000020838, E1BBT9_BOVIN	INS	FRAME_SHIFT
chr17	30636666	*	+A	ENSBTAT00000030035, ENSBTAG00000005435	INS	FRAME_SHIFT
chr17	35145716	*	+T	ENSBTAT00000000136, F1MFP1_BOVIN	INS	FRAME_SHIFT
chr17	35873502	*	+CC	ENSBTAT00000066049, ENSBTAG00000045738	INS	FRAME_SHIFT
chr17	35873505	*	-GG	ENSBTAT00000066049, ENSBTAG00000045738	DEL	FRAME_SHIFT
chr17	35873638	*	-AA	ENSBTAT00000066049, ENSBTAG00000045738	DEL	FRAME_SHIFT
chr17	35873643	*	-T	ENSBTAT00000066049, ENSBTAG00000045738	DEL	FRAME_SHIFT
chr17	39883941	*	+CCCCG	ENSBTAT00000037567, ULBP3	INS	FRAME_SHIFT
chr17	39883943	*	+AGCC	ENSBTAT00000037567, ULBP3	INS	FRAME_SHIFT
chr17	39883945	*	-GG	ENSBTAT00000037567, ULBP3	DEL	FRAME_SHIFT
chr17	39883958	*	-CCTCAGGACTCAGT	ENSBTAT00000037567, ULBP3	DEL	FRAME_SHIFT
chr17	39883975	*	-TGCTC	ENSBTAT00000037567, ULBP3	DEL	FRAME_SHIFT
chr17	39884002	*	-TTCAC	ENSBTAT00000037567, ULBP3	DEL	FRAME_SHIFT
chr17	41333937	*	-AA	ENSBTAT00000013620, RXFP1	DEL	FRAME_SHIFT
chr17	44498806	*	-CT	ENSBTAT00000062972, GCYB1_BOVIN	DEL	FRAME_SHIFT
chr17	45141471	*	+C	ENSBTAT00000054776, A6QQC1_BOVIN	INS	FRAME_SHIFT
chr17	51378064	*	+G	ENSBTAT00000063108, ENSBTAG00000047085	INS	FRAME_SHIFT
chr17	51814317	*	-G	ENSBTAT00000064350, ENSBTAG00000046986	DEL	FRAME_SHIFT
chr17	53142511	*	+CA	ENSBTAT00000046011, ENSBTAG00000032436	INS	FRAME_SHIFT
chr17	53143410	*	-C	ENSBTAT00000046011, ENSBTAG00000032436	DEL	FRAME_SHIFT
chr17	53633217	*	-GCAGCAGCAGCA	ENSBTAT00000034273, NCOR2	DEL	FRAME_SHIFT
chr17	54921587	*	-GCCGCTCCTGGCTCAGC	ENSBTAT00000028783, HIP1R	DEL	FRAME_SHIFT
chr17	55425725	*	-GT	ENSBTAT00000005490, LRRC43	DEL	FRAME_SHIFT
chr17	55642618	*	+T	ENSBTAT00000005477, WDR66	INS	FRAME_SHIFT
chr17	56625447	*	-G	ENSBTAT00000024392, RAD9B	DEL	FRAME_SHIFT
chr17	59393508	*	-CA	ENSBTAT00000010329, VSIG10	DEL	FRAME_SHIFT
chr17	60343131	*	-AAAAAAA	ENSBTAT00000064959, FBXW8	DEL	FRAME_SHIFT
chr17	63285421	*	+C	ENSBTAT00000011776, A5PKH5_BOVIN	INS	FRAME_SHIFT
chr17	63654704	*	+AA	ENSBTAT00000002019, OAS1	INS	FRAME_SHIFT
chr17	64825854	*	+A	ENSBTAT00000024101, PXN	INS	FRAME_SHIFT
chr17	66097203	*	-GGGGCCTTCGGAGACTCCCCGCTTGGCTGTGAGCTGGGGGCCTCGGGCCTGAC	ENSBTAT00000014397, FOXN4	DEL	FRAME_SHIFT
chr17	71453576	*	-TT	ENSBTAT00000024074, GATL3_BOVIN	DEL	FRAME_SHIFT
chr17	71526750	*	-A	ENSBTAT00000002776, CCDC157	DEL	FRAME_SHIFT
chr17	71534991	*	-C	ENSBTAT00000004400, RNF215	DEL	FRAME_SHIFT
chr17	71535037	*	-A	ENSBTAT00000004400, RNF215	DEL	FRAME_SHIFT
chr17	71661311	*	-C	ENSBTAT00000053943, GAL3ST1	DEL	FRAME_SHIFT
chr17	72827182	*	-AG	ENSBTAT00000065780, IGLL1	DEL	FRAME_SHIFT
chr17	72827185	*	+AC	ENSBTAT00000065780, IGLL1	INS	FRAME_SHIFT
chr17	72849440	*	+TA	ENSBTAT00000032988, ENSBTAG00000047529	INS	FRAME_SHIFT
chr17	72849443	*	-TG	ENSBTAT00000032988, ENSBTAG00000047529	DEL	FRAME_SHIFT
chr17	73020638	*	-A	ENSBTAT00000063597, ZNF280A	DEL	FRAME_SHIFT
chr17	73020904	*	+GTCACACAGCTCAGCTGAGGGTTGTGAGTCACTCAGCTCAGCTG	ENSBTAT00000063597, ZNF280A	INS	FRAME_SHIFT
chr17	73021132	*	-CG	ENSBTAT00000063597, ZNF280A	DEL	FRAME_SHIFT
chr17	73427544	*	+C	ENSBTAT00000023658, GGT5	INS	FRAME_SHIFT
chr17	74364316	*	-C	ENSBTAT00000025626, P2RX6	DEL	FRAME_SHIFT
chr17	74368679	*	+GTAGGCGCGGCGGAGCAGTGTCCGCAGCATCAGGAGGCAGAACGCGAACGGCA	ENSBTAT00000012050, SLC7A4	INS	FRAME_SHIFT
chr17	74635924	*	-AAAAA	ENSBTAT00000011242, SLC25A1	DEL	FRAME_SHIFT
chr17	74936084	*	-T	ENSBTAT00000061101, A7YY26_BOVIN	DEL	FRAME_SHIFT
chr18	2887762	*	+TGGAGAAACGCCATGCTCTGCATCACGAATGA	ENSBTAT00000020510, TM231_BOVIN	INS	FRAME_SHIFT
chr18	2956346	*	-C	ENSBTAT00000020810, A2VDL0_BOVIN	DEL	FRAME_SHIFT
chr18	4394564	*	+G	ENSBTAT00000016092, ENSBTAG00000012131	INS	FRAME_SHIFT
chr18	8485249	*	+TC	ENSBTAT00000002717, PLCG2	INS	FRAME_SHIFT
chr18	8485251	*	-AG	ENSBTAT00000002717, PLCG2	DEL	FRAME_SHIFT
chr18	10484267	*	-GGCGGCTGGGGATGGTGAGGCCTGGGTGGGGGCAGGGATGGGGAGCTGGG	ENSBTAT00000048562, ADAD2	DEL	FRAME_SHIFT
chr18	10850782	*	+G	ENSBTAT00000011036, KLH36_BOVIN	INS	FRAME_SHIFT
chr18	13269362	*	-CC	ENSBTAT00000009093, KLHDC4	DEL	FRAME_SHIFT
chr18	13269365	*	-C	ENSBTAT00000009093, KLHDC4	DEL	FRAME_SHIFT
chr18	13989691	*	-A	ENSBTAT00000027897, PIEZO1	DEL	FRAME_SHIFT
chr18	13990101	*	+AGGCCTGGCGCAG	ENSBTAT00000027897, PIEZO1	INS	FRAME_SHIFT
chr18	14535379	*	+G	ENSBTAT00000047320, F1MK30_BOVIN	INS	FRAME_SHIFT
chr18	14757924	*	-G	ENSBTAT00000032494, MSHR_BOVIN	DEL	FRAME_SHIFT
chr18	25717228	*	-G	ENSBTAT00000053037, ENSBTAG00000038141	DEL	FRAME_SHIFT
chr18	25733781	*	+GT	ENSBTAT00000064892, GPR97	INS	FRAME_SHIFT
chr18	25815764	*	-C	ENSBTAT00000032447, KIFC3	DEL	FRAME_SHIFT
chr18	29449853	*	+TTTTTTT	ENSBTAT00000065042, ENSBTAG00000046749	INS	FRAME_SHIFT
chr18	29449853	*	+TTTT	ENSBTAT00000065042, ENSBTAG00000046749	INS	FRAME_SHIFT
chr18	29483197	*	-C	ENSBTAT00000065042, ENSBTAG00000046749	DEL	FRAME_SHIFT
chr18	34392999	*	+TA	ENSBTAT00000006795, TK2	INS	FRAME_SHIFT
chr18	35335668	*	+A	ENSBTAT00000032504, PARD6A	INS	FRAME_SHIFT
chr18	35335680	*	+A	ENSBTAT00000032504, PARD6A	INS	FRAME_SHIFT
chr18	39211794	*	+G	ENSBTAT00000026495, ENSBTAG00000019887	INS	FRAME_SHIFT
chr18	43045952	*	+A	ENSBTAT00000018782, ZNF507	INS	FRAME_SHIFT
chr18	43402036	*	+A	ENSBTAT00000025658, TDRD12	INS	FRAME_SHIFT
chr18	43402035	*	-A	ENSBTAT00000025658, TDRD12	DEL	FRAME_SHIFT
chr18	43571934	*	-AAGAA	ENSBTAT00000065656, FAP24_BOVIN	DEL	FRAME_SHIFT
chr18	43694814	*	+T	ENSBTAT00000000963, GPATCH1	INS	FRAME_SHIFT
chr18	45004596	*	-C	ENSBTAT00000008386, F1MD19_BOVIN	DEL	FRAME_SHIFT
chr18	46667626	*	-CCCCGGCAGGG	ENSBTAT00000063505, C19orf55	DEL	FRAME_SHIFT
chr18	46667626	*	-CCCCGGCAGGG	ENSBTAT00000064272, C19orf55	DEL	FRAME_SHIFT
chr18	46667631	*	-GCAGGGCC	ENSBTAT00000063505, C19orf55	DEL	FRAME_SHIFT
chr18	46667639	*	+G	ENSBTAT00000063505, C19orf55	INS	FRAME_SHIFT
chr18	46667639	*	+G	ENSBTAT00000064272, C19orf55	INS	FRAME_SHIFT
chr18	47754553	*	-A	ENSBTAT00000006317, ZN345_BOVIN	DEL	FRAME_SHIFT
chr18	48217102	*	-T	ENSBTAT00000024256, SIPA1L3	DEL	FRAME_SHIFT
chr18	48239222	*	-T	ENSBTAT00000024256, SIPA1L3	DEL	FRAME_SHIFT
chr18	48239221	*	-TT	ENSBTAT00000024256, SIPA1L3	DEL	FRAME_SHIFT
chr18	48326261	*	+TCCTGTGAACCCCGTCCTGTGAACCCCC	ENSBTAT00000000207, Q2KJ54_BOVIN	INS	FRAME_SHIFT
chr18	48442723	*	-AA	ENSBTAT00000000821, CATSPERG	DEL	FRAME_SHIFT
chr18	48460018	*	-GGGCCGGGGCCGGGGCCGGGGCCGGGGCC	ENSBTAT00000044856, GGN	DEL	FRAME_SHIFT
chr18	48460030	*	-GGGCCGGGGCCGGGGCC	ENSBTAT00000044856, GGN	DEL	FRAME_SHIFT
chr18	48460036	*	-GGGCCGGGGCC	ENSBTAT00000044856, GGN	DEL	FRAME_SHIFT
chr18	48622373	*	-G	ENSBTAT00000009228, RYR1	DEL	FRAME_SHIFT
chr18	48804237	*	-C	ENSBTAT00000021701, LGALS4	DEL	FRAME_SHIFT
chr18	49164600	*	+C	ENSBTAT00000018545, Q17QZ0_BOVIN	INS	FRAME_SHIFT
chr18	49164605	*	-G	ENSBTAT00000018545, Q17QZ0_BOVIN	DEL	FRAME_SHIFT
chr18	49164607	*	-CCCCGGGCCCCCCG	ENSBTAT00000018545, Q17QZ0_BOVIN	DEL	FRAME_SHIFT
chr18	49790202	*	-ACCAG	ENSBTAT00000064085, ENSBTAG00000018242	DEL	FRAME_SHIFT
chr18	49790210	*	+AA	ENSBTAT00000064085, ENSBTAG00000018242	INS	FRAME_SHIFT
chr18	49790215	*	+CATA	ENSBTAT00000064085, ENSBTAG00000018242	INS	FRAME_SHIFT
chr18	50349740	*	+GCAG	ENSBTAT00000063781, CYP2F1	INS	FRAME_SHIFT
chr18	51139566	*	+CTAATTTA	ENSBTAT00000009007, CEACAM8	INS	FRAME_SHIFT
chr18	51139566	*	+CTAATTTA	ENSBTAT00000007371, CEACAM8	INS	FRAME_SHIFT
chr18	51578811	*	-G	ENSBTAT00000015567, GRIK5	DEL	FRAME_SHIFT
chr18	51760783	*	-G	ENSBTAT00000007381, ENSBTAG00000006859	DEL	FRAME_SHIFT
chr18	51760793	*	+ACAT	ENSBTAT00000007381, ENSBTAG00000006859	INS	FRAME_SHIFT
chr18	51760797	*	-GCGC	ENSBTAT00000007381, ENSBTAG00000006859	DEL	FRAME_SHIFT
chr18	51887833	*	-C	ENSBTAT00000003875, CD177	DEL	FRAME_SHIFT
chr18	52070845	*	-C	ENSBTAT00000043790, Q32L43_BOVIN	DEL	FRAME_SHIFT
chr18	52073646	*	-G	ENSBTAT00000043790, Q32L43_BOVIN	DEL	FRAME_SHIFT
chr18	52247962	*	-GA	ENSBTAT00000031948, ENSBTAG00000023439	DEL	FRAME_SHIFT
chr18	52247966	*	+TG	ENSBTAT00000031948, ENSBTAG00000023439	INS	FRAME_SHIFT
chr18	52483996	*	-AGAA	ENSBTAT00000055214, ZN227_BOVIN	DEL	FRAME_SHIFT
chr18	52503935	*	+GA	ENSBTAT00000017798, ZN227_BOVIN	INS	FRAME_SHIFT
chr18	52503934	*	-A	ENSBTAT00000017798, ZN227_BOVIN	DEL	FRAME_SHIFT
chr18	53025335	*	-C	ENSBTAT00000032251, TOM40_BOVIN	DEL	FRAME_SHIFT
chr18	54081365	*	-C	ENSBTAT00000012291, PNML1_BOVIN	DEL	FRAME_SHIFT
chr18	54126369	*	+CAGACAA	ENSBTAT00000024194, Q5BIM6_BOVIN	INS	FRAME_SHIFT
chr18	54126370	*	+CAGAGGGCAGAGGCCCC	ENSBTAT00000024194, Q5BIM6_BOVIN	INS	FRAME_SHIFT
chr18	54131013	*	-T	ENSBTAT00000063581, PNMAL2	DEL	FRAME_SHIFT
chr18	55456207	*	+G	ENSBTAT00000043347, CCDC114	INS	FRAME_SHIFT
chr18	55456221	*	+T	ENSBTAT00000043347, CCDC114	INS	FRAME_SHIFT
chr18	55540857	*	+G	ENSBTAT00000042550, GRIN2D	INS	FRAME_SHIFT
chr18	55615992	*	+GGGG	ENSBTAT00000015942, LMTK3	INS	FRAME_SHIFT
chr18	55830878	*	-C	ENSBTAT00000023560, A4IFH1_BOVIN	DEL	FRAME_SHIFT
chr18	55830878	*	-C	ENSBTAT00000031820, A4IFH1_BOVIN	DEL	FRAME_SHIFT
chr18	56227937	*	+CC	ENSBTAT00000017256, SLC6A16	INS	FRAME_SHIFT
chr18	56227938	*	-AG	ENSBTAT00000017256, SLC6A16	DEL	FRAME_SHIFT
chr18	56473695	*	-AAAA	ENSBTAT00000031875, PRR12	DEL	FRAME_SHIFT
chr18	56473700	*	+CCGC	ENSBTAT00000031875, PRR12	INS	FRAME_SHIFT
chr18	56498748	*	-TTCG	ENSBTAT00000027944, Q2TBH2_BOVIN	DEL	FRAME_SHIFT
chr18	56616606	*	+G	ENSBTAT00000043179, Q1JPJ7_BOVIN	INS	FRAME_SHIFT
chr18	56645411	*	-TTTT	ENSBTAT00000043183, MED25	DEL	FRAME_SHIFT
chr18	56645415	*	+CAGC	ENSBTAT00000043183, MED25	INS	FRAME_SHIFT
chr18	56646774	*	-T	ENSBTAT00000043183, MED25	DEL	FRAME_SHIFT
chr18	56794901	*	+A	ENSBTAT00000016000, ZNF473	INS	FRAME_SHIFT
chr18	56971575	*	+G	ENSBTAT00000008917, E1BJW6_BOVIN	INS	FRAME_SHIFT
chr18	56995401	*	+AA	ENSBTAT00000063423, ENSBTAG00000048283	INS	FRAME_SHIFT
chr18	57537717	*	-T	ENSBTAT00000006050, CEACAM18	DEL	FRAME_SHIFT
chr18	57631265	*	-TA	ENSBTAT00000057355, ENSBTAG00000037710	DEL	FRAME_SHIFT
chr18	57631268	*	+TG	ENSBTAT00000057355, ENSBTAG00000037710	INS	FRAME_SHIFT
chr18	57631275	*	+AGTGAATAACGGGTAAAGG	ENSBTAT00000057355, ENSBTAG00000037710	INS	FRAME_SHIFT
chr18	57631280	*	+TCTGT	ENSBTAT00000057355, ENSBTAG00000037710	INS	FRAME_SHIFT
chr18	57631281	*	+AGTGAATAACGGGTAAAGGCTT	ENSBTAT00000057355, ENSBTAG00000037710	INS	FRAME_SHIFT
chr18	57631286	*	+A	ENSBTAT00000057355, ENSBTAG00000037710	INS	FRAME_SHIFT
chr18	57631288	*	+ATGGATTCGTTGATGCTGAGTAAGAAGTGAATAACGGG	ENSBTAT00000057355, ENSBTAG00000037710	INS	FRAME_SHIFT
chr18	57680999	*	-AG	ENSBTAT00000022417, ENSBTAG00000037699	DEL	FRAME_SHIFT
chr18	57681600	*	+C	ENSBTAT00000022417, ENSBTAG00000037699	INS	FRAME_SHIFT
chr18	57681690	*	+AT	ENSBTAT00000022417, ENSBTAG00000037699	INS	FRAME_SHIFT
chr18	57950976	*	-TG	ENSBTAT00000066015, ENSBTAG00000045880	DEL	FRAME_SHIFT
chr18	57950981	*	+CG	ENSBTAT00000066015, ENSBTAG00000045880	INS	FRAME_SHIFT
chr18	57951245	*	-GCTG	ENSBTAT00000066015, ENSBTAG00000045880	DEL	FRAME_SHIFT
chr18	57951251	*	+AGTT	ENSBTAT00000066015, ENSBTAG00000045880	INS	FRAME_SHIFT
chr18	57952500	*	-CC	ENSBTAT00000066015, ENSBTAG00000045880	DEL	FRAME_SHIFT
chr18	57952503	*	+AG	ENSBTAT00000066015, ENSBTAG00000045880	INS	FRAME_SHIFT
chr18	57952967	*	-CCT	ENSBTAT00000066015, ENSBTAG00000045880	DEL	FRAME_SHIFT
chr18	57953018	*	-TC	ENSBTAT00000066015, ENSBTAG00000045880	DEL	FRAME_SHIFT
chr18	58022257	*	+A	ENSBTAT00000065736, ENSBTAG00000048204	INS	FRAME_SHIFT
chr18	58022256	*	-A	ENSBTAT00000065736, ENSBTAG00000048204	DEL	FRAME_SHIFT
chr18	58022266	*	+C	ENSBTAT00000065736, ENSBTAG00000048204	INS	FRAME_SHIFT
chr18	58068844	*	+CATATACATA	ENSBTAT00000052300, ENSBTAG00000039491	INS	FRAME_SHIFT
chr18	58068847	*	+ATACATAC	ENSBTAT00000052300, ENSBTAG00000039491	INS	FRAME_SHIFT
chr18	58068849	*	+AC	ENSBTAT00000052300, ENSBTAG00000039491	INS	FRAME_SHIFT
chr18	58068851	*	+AC	ENSBTAT00000052300, ENSBTAG00000039491	INS	FRAME_SHIFT
chr18	58088057	*	+CACTCACCACATC	ENSBTAT00000031816, ENSBTAG00000014593	INS	FRAME_SHIFT
chr18	58618135	*	+T	ENSBTAT00000065622, ENSBTAG00000047791	INS	FRAME_SHIFT
chr18	58640906	*	+T	ENSBTAT00000065944, ENSBTAG00000047761	INS	FRAME_SHIFT
chr18	59225853	*	-A	ENSBTAT00000056654, ENSBTAG00000037440	DEL	FRAME_SHIFT
chr18	59225852	*	-AA	ENSBTAT00000056654, ENSBTAG00000037440	DEL	FRAME_SHIFT
chr18	59386289	*	+A	ENSBTAT00000015500, ENSBTAG00000030454	INS	FRAME_SHIFT
chr18	59902257	*	-G	ENSBTAT00000028575, ENSBTAG00000015899	DEL	FRAME_SHIFT
chr18	60070957	*	-T	ENSBTAT00000028697, ENSBTAG00000011844	DEL	FRAME_SHIFT
chr18	60071035	*	+TGTGAGGTTA	ENSBTAT00000028697, ENSBTAG00000011844	INS	FRAME_SHIFT
chr18	60071037	*	+C	ENSBTAT00000028697, ENSBTAG00000011844	INS	FRAME_SHIFT
chr18	60071039	*	+A	ENSBTAT00000028697, ENSBTAG00000011844	INS	FRAME_SHIFT
chr18	60071340	*	-TCCAGTATGAATTCTT	ENSBTAT00000028697, ENSBTAG00000011844	DEL	FRAME_SHIFT
chr18	60074023	*	+A	ENSBTAT00000028697, ENSBTAG00000011844	INS	FRAME_SHIFT
chr18	60120819	*	+A	ENSBTAT00000063211, ZNF534	INS	FRAME_SHIFT
chr18	60545714	*	+T	ENSBTAT00000052961, ENSBTAG00000038702	INS	FRAME_SHIFT
chr18	60545714	*	+T	ENSBTAT00000056208, ENSBTAG00000038702	INS	FRAME_SHIFT
chr18	60705260	*	-C	ENSBTAT00000063821, ENSBTAG00000045581	DEL	FRAME_SHIFT
chr18	60705262	*	-TTGCTACATTCTGTACATTTATAAGGTTTCTCTAGAGTATGAATTCGCTGATGTTCAATAAGGTCTGAGTTGGAAGTAAAGGC	ENSBTAT00000063821, ENSBTAG00000045581	DEL	FRAME_SHIFT
chr18	60978262	*	-TAAAGGCTTTGCCACATTGTGTACATTTATAAGGTTTCTCTCCAGTATGAACTTACAAATGTGTAGTAAGAATTGAGTTCTGAT	ENSBTAT00000056450, ENSBTAG00000038755	DEL	FRAME_SHIFT
chr18	61021146	*	+T	ENSBTAT00000021950, ZNF331	INS	FRAME_SHIFT
chr18	61021153	*	+C	ENSBTAT00000021950, ZNF331	INS	FRAME_SHIFT
chr18	61021155	*	-AT	ENSBTAT00000021950, ZNF331	DEL	FRAME_SHIFT
chr18	61021160	*	+CT	ENSBTAT00000021950, ZNF331	INS	FRAME_SHIFT
chr18	61021166	*	+G	ENSBTAT00000021950, ZNF331	INS	FRAME_SHIFT
chr18	61021221	*	-A	ENSBTAT00000021950, ZNF331	DEL	FRAME_SHIFT
chr18	61021243	*	+G	ENSBTAT00000021950, ZNF331	INS	FRAME_SHIFT
chr18	61021307	*	-TA	ENSBTAT00000021950, ZNF331	DEL	FRAME_SHIFT
chr18	61021310	*	+CG	ENSBTAT00000021950, ZNF331	INS	FRAME_SHIFT
chr18	61208276	*	+A	ENSBTAT00000010394, MGC139164	INS	FRAME_SHIFT
chr18	61208331	*	+GG	ENSBTAT00000010394, MGC139164	INS	FRAME_SHIFT
chr18	61208661	*	+CAAAG	ENSBTAT00000010394, MGC139164	INS	FRAME_SHIFT
chr18	61208700	*	-G	ENSBTAT00000010394, MGC139164	DEL	FRAME_SHIFT
chr18	61208993	*	+AGTT	ENSBTAT00000010394, MGC139164	INS	FRAME_SHIFT
chr18	61208994	*	-GCCC	ENSBTAT00000010394, MGC139164	DEL	FRAME_SHIFT
chr18	61230122	*	+CCCA	ENSBTAT00000002953, ENSBTAG00000000336	INS	FRAME_SHIFT
chr18	61270524	*	-T	ENSBTAT00000017752, ENSBTAG00000046961	DEL	FRAME_SHIFT
chr18	61390163	*	-C	ENSBTAT00000019911, ENSBTAG00000014953	DEL	FRAME_SHIFT
chr18	61415692	*	-A	ENSBTAT00000012086, ENSBTAG00000009171	DEL	FRAME_SHIFT
chr18	61415692	*	-A	ENSBTAT00000023823, ENSBTAG00000009171	DEL	FRAME_SHIFT
chr18	61635266	*	-A	ENSBTAT00000065350, ENSBTAG00000047602	DEL	FRAME_SHIFT
chr18	62157056	*	+T	ENSBTAT00000065290, A6QQ80_BOVIN	INS	FRAME_SHIFT
chr18	62260364	*	+C	ENSBTAT00000056510, ENSBTAG00000040294	INS	FRAME_SHIFT
chr18	62348168	*	+GCCGGGG	ENSBTAT00000065669, ZNF581	INS	FRAME_SHIFT
chr18	62843739	*	+A	ENSBTAT00000028846, FCAR	INS	FRAME_SHIFT
chr18	62895902	*	+C	ENSBTAT00000064016, ENSBTAG00000045854	INS	FRAME_SHIFT
chr18	62895912	*	-TG	ENSBTAT00000064016, ENSBTAG00000045854	DEL	FRAME_SHIFT
chr18	62896035	*	-ACTTTGAA	ENSBTAT00000064016, ENSBTAG00000045854	DEL	FRAME_SHIFT
chr18	62898295	*	+A	ENSBTAT00000064016, ENSBTAG00000045854	INS	FRAME_SHIFT
chr18	62898298	*	+GGGAGGTAGGGGGGGT	ENSBTAT00000064016, ENSBTAG00000045854	INS	FRAME_SHIFT
chr18	62977266	*	-TCGAATT	ENSBTAT00000053352, KIR2DS1	DEL	FRAME_SHIFT
chr18	62980326	*	+A	ENSBTAT00000053352, KIR2DS1	INS	FRAME_SHIFT
chr18	63016851	*	-G	ENSBTAT00000028085, ENSBTAG00000039413	DEL	FRAME_SHIFT
chr18	63025727	*	+G	ENSBTAT00000052297, ENSBTAG00000038797	INS	FRAME_SHIFT
chr18	63026638	*	-CT	ENSBTAT00000052297, ENSBTAG00000038797	DEL	FRAME_SHIFT
chr18	63026641	*	+GG	ENSBTAT00000052297, ENSBTAG00000038797	INS	FRAME_SHIFT
chr18	63028262	*	-AC	ENSBTAT00000052297, ENSBTAG00000038797	DEL	FRAME_SHIFT
chr18	63028266	*	+CC	ENSBTAT00000052297, ENSBTAG00000038797	INS	FRAME_SHIFT
chr18	63114757	*	-C	ENSBTAT00000055739, A7E2Y7_BOVIN	DEL	FRAME_SHIFT
chr18	63120159	*	-AAAAA	ENSBTAT00000064815, CDC42EP5	DEL	FRAME_SHIFT
chr18	63120164	*	+GGGCG	ENSBTAT00000064815, CDC42EP5	INS	FRAME_SHIFT
chr18	63153586	*	-CC	ENSBTAT00000018868, ENSBTAG00000019547	DEL	FRAME_SHIFT
chr18	63153592	*	+G	ENSBTAT00000018868, ENSBTAG00000019547	INS	FRAME_SHIFT
chr18	63153594	*	+T	ENSBTAT00000018868, ENSBTAG00000019547	INS	FRAME_SHIFT
chr18	63154198	*	+AC	ENSBTAT00000018868, ENSBTAG00000019547	INS	FRAME_SHIFT
chr18	63154368	*	-C	ENSBTAT00000018868, ENSBTAG00000019547	DEL	FRAME_SHIFT
chr18	63207865	*	+CC	ENSBTAT00000025766, LILRA4	INS	FRAME_SHIFT
chr18	63207867	*	-AG	ENSBTAT00000025766, LILRA4	DEL	FRAME_SHIFT
chr18	63239530	*	+C	ENSBTAT00000054752, ENSBTAG00000048145	INS	FRAME_SHIFT
chr18	63240195	*	+C	ENSBTAT00000054752, ENSBTAG00000048145	INS	FRAME_SHIFT
chr18	63267361	*	-G	ENSBTAT00000054607, ENSBTAG00000039086	DEL	FRAME_SHIFT
chr18	63269730	*	+C	ENSBTAT00000054607, ENSBTAG00000039086	INS	FRAME_SHIFT
chr18	63270167	*	-T	ENSBTAT00000054607, ENSBTAG00000039086	DEL	FRAME_SHIFT
chr18	63270170	*	+G	ENSBTAT00000054607, ENSBTAG00000039086	INS	FRAME_SHIFT
chr18	63283360	*	-G	ENSBTAT00000007679, ENSBTAG00000019348	DEL	FRAME_SHIFT
chr18	63315010	*	-AC	ENSBTAT00000007682, ENSBTAG00000039691	DEL	FRAME_SHIFT
chr18	63315014	*	+GG	ENSBTAT00000007682, ENSBTAG00000039691	INS	FRAME_SHIFT
chr18	63647023	*	+TT	ENSBTAT00000054525, NLRP8	INS	FRAME_SHIFT
chr18	63688442	*	-CCCCCCCC	ENSBTAT00000003771, ZNF787	DEL	FRAME_SHIFT
chr18	63688450	*	+GTGTGCGT	ENSBTAT00000003771, ZNF787	INS	FRAME_SHIFT
chr18	63705833	*	+GGAC	ENSBTAT00000048598, LOC512150	INS	FRAME_SHIFT
chr18	63705834	*	-TCTT	ENSBTAT00000048598, LOC512150	DEL	FRAME_SHIFT
chr18	63706062	*	+T	ENSBTAT00000048598, LOC512150	INS	FRAME_SHIFT
chr18	63706067	*	-ATATGAT	ENSBTAT00000048598, LOC512150	DEL	FRAME_SHIFT
chr18	63706263	*	-GC	ENSBTAT00000048598, LOC512150	DEL	FRAME_SHIFT
chr18	63706266	*	+AA	ENSBTAT00000048598, LOC512150	INS	FRAME_SHIFT
chr18	63706269	*	+AT	ENSBTAT00000048598, LOC512150	INS	FRAME_SHIFT
chr18	63706272	*	-GT	ENSBTAT00000048598, LOC512150	DEL	FRAME_SHIFT
chr18	63729096	*	-AAAAAA	ENSBTAT00000065840, ZNF444	DEL	FRAME_SHIFT
chr18	63729102	*	+CCGGC	ENSBTAT00000065840, ZNF444	INS	FRAME_SHIFT
chr18	63754538	*	-C	ENSBTAT00000054524, ENSBTAG00000039081	DEL	FRAME_SHIFT
chr18	63760231	*	-CC	ENSBTAT00000056913, LOC768229	DEL	FRAME_SHIFT
chr18	63760233	*	-CA	ENSBTAT00000056913, LOC768229	DEL	FRAME_SHIFT
chr18	63760238	*	+GC	ENSBTAT00000056913, LOC768229	INS	FRAME_SHIFT
chr18	63794897	*	-A	ENSBTAT00000015461, ENSBTAG00000047236	DEL	FRAME_SHIFT
chr18	63795091	*	-A	ENSBTAT00000015461, ENSBTAG00000047236	DEL	FRAME_SHIFT
chr18	63795095	*	+T	ENSBTAT00000015461, ENSBTAG00000047236	INS	FRAME_SHIFT
chr18	63822277	*	-AA	ENSBTAT00000015462, ENSBTAG00000039628	DEL	FRAME_SHIFT
chr18	63823322	*	-AT	ENSBTAT00000054167, ENSBTAG00000039628	DEL	FRAME_SHIFT
chr18	63823326	*	+TC	ENSBTAT00000054167, ENSBTAG00000039628	INS	FRAME_SHIFT
chr18	63952195	*	+A	ENSBTAT00000063919, ZNF582	INS	FRAME_SHIFT
chr18	63968854	*	+TACTTTA	ENSBTAT00000038858, ZNF582	INS	FRAME_SHIFT
chr18	63990178	*	+A	ENSBTAT00000038858, ZNF582	INS	FRAME_SHIFT
chr18	64693860	*	-AG	ENSBTAT00000023758, ZNF304	DEL	FRAME_SHIFT
chr18	65076993	*	+ATAT	ENSBTAT00000063068, VN1R1	INS	FRAME_SHIFT
chr18	65078128	*	-T	ENSBTAT00000063068, VN1R1	DEL	FRAME_SHIFT
chr18	65105536	*	-CT	ENSBTAT00000063817, LOC100124497	DEL	FRAME_SHIFT
chr18	65105779	*	+CA	ENSBTAT00000063817, LOC100124497	INS	FRAME_SHIFT
chr18	65209082	*	+GG	ENSBTAT00000044684, LOC509810	INS	FRAME_SHIFT
chr18	65209083	*	-CAGTC	ENSBTAT00000044684, LOC509810	DEL	FRAME_SHIFT
chr18	65294531	*	-CA	ENSBTAT00000013096, ZNF551	DEL	FRAME_SHIFT
chr18	65621437	*	+C	ENSBTAT00000013247, ENSBTAG00000027787	INS	FRAME_SHIFT
chr18	65828154	*	-C	ENSBTAT00000012837, A1BG_BOVIN	DEL	FRAME_SHIFT
chr19	5840122	*	-A	ENSBTAT00000000244, MMD	DEL	FRAME_SHIFT
chr19	9209582	*	+G	ENSBTAT00000049477, ENSBTAG00000035001	INS	FRAME_SHIFT
chr19	9352167	*	-GG	ENSBTAT00000063246, ENSBTAG00000045921	DEL	FRAME_SHIFT
chr19	9352171	*	+CA	ENSBTAT00000063246, ENSBTAG00000045921	INS	FRAME_SHIFT
chr19	9670233	*	-G	ENSBTAT00000001549, HSF5	DEL	FRAME_SHIFT
chr19	10410659	*	-C	ENSBTAT00000048450, GDPD1	DEL	FRAME_SHIFT
chr19	11492425	*	+G	ENSBTAT00000063240, ENSBTAG00000047313	INS	FRAME_SHIFT
chr19	15141376	*	-CAT	ENSBTAT00000025891, ENSBTAG00000019437	DEL	FRAME_SHIFT
chr19	18331783	*	-GA	ENSBTAT00000022890, RNF135	DEL	FRAME_SHIFT
chr19	18604798	*	+G	ENSBTAT00000002453, COPR5_BOVIN	INS	FRAME_SHIFT
chr19	19874971	*	-GG	ENSBTAT00000034023, ENSBTAG00000024490	DEL	FRAME_SHIFT
chr19	19874975	*	+AC	ENSBTAT00000034023, ENSBTAG00000024490	INS	FRAME_SHIFT
chr19	19875134	*	-GATG	ENSBTAT00000034023, ENSBTAG00000024490	DEL	FRAME_SHIFT
chr19	19875141	*	-TT	ENSBTAT00000034023, ENSBTAG00000024490	DEL	FRAME_SHIFT
chr19	20721686	*	+CCCCC	ENSBTAT00000020643, NEK8	INS	FRAME_SHIFT
chr19	20721689	*	-TCCAA	ENSBTAT00000020643, NEK8	DEL	FRAME_SHIFT
chr19	21754664	*	+A	ENSBTAT00000025455, EFCAB5	INS	FRAME_SHIFT
chr19	21867730	*	+GC	ENSBTAT00000025774, SLC6A4	INS	FRAME_SHIFT
chr19	21867737	*	-T	ENSBTAT00000025774, SLC6A4	DEL	FRAME_SHIFT
chr19	21867741	*	-TA	ENSBTAT00000025774, SLC6A4	DEL	FRAME_SHIFT
chr19	21867750	*	+CCCT	ENSBTAT00000025774, SLC6A4	INS	FRAME_SHIFT
chr19	21867762	*	+TC	ENSBTAT00000025774, SLC6A4	INS	FRAME_SHIFT
chr19	21867764	*	-CA	ENSBTAT00000025774, SLC6A4	DEL	FRAME_SHIFT
chr19	22026402	*	+G	ENSBTAT00000016421, CPD	INS	FRAME_SHIFT
chr19	24569887	*	+G	ENSBTAT00000025838, ENSBTAG00000019391	INS	FRAME_SHIFT
chr19	24613314	*	-T	ENSBTAT00000064952, ENSBTAG00000048099	DEL	FRAME_SHIFT
chr19	24730845	*	-CT	ENSBTAT00000064410, ENSBTAG00000045667	DEL	FRAME_SHIFT
chr19	24846289	*	-A	ENSBTAT00000004734, F1MUZ8_BOVIN	DEL	FRAME_SHIFT
chr19	25759839	*	+CAGG	ENSBTAT00000015077, XAF1	INS	FRAME_SHIFT
chr19	25901977	*	-AACTC	ENSBTAT00000064610, ENSBTAG00000047858	DEL	FRAME_SHIFT
chr19	25902161	*	-GGCAGAC	ENSBTAT00000064610, ENSBTAG00000047858	DEL	FRAME_SHIFT
chr19	25902209	*	+A	ENSBTAT00000064610, ENSBTAG00000047858	INS	FRAME_SHIFT
chr19	25902301	*	-CATCCACAAGATGACCTCTTACGCCCAGCACCATCAGGTCCACC	ENSBTAT00000064610, ENSBTAG00000047858	DEL	FRAME_SHIFT
chr19	27130696	*	+G	ENSBTAT00000017318, A6H7I9_BOVIN	INS	FRAME_SHIFT
chr19	27244097	*	+G	ENSBTAT00000045384, ZMYND15	INS	FRAME_SHIFT
chr19	27618914	*	-G	ENSBTAT00000012109, GTR4_BOVIN	DEL	FRAME_SHIFT
chr19	28218529	*	-T	ENSBTAT00000019888, KCNAB3	DEL	FRAME_SHIFT
chr19	28218536	*	-C	ENSBTAT00000019888, KCNAB3	DEL	FRAME_SHIFT
chr19	28998922	*	+T	ENSBTAT00000063724, PIK3R5	INS	FRAME_SHIFT
chr19	28998922	*	+T	ENSBTAT00000065956, PIK3R5	INS	FRAME_SHIFT
chr19	28998922	*	+T	ENSBTAT00000007845, PIK3R5	INS	FRAME_SHIFT
chr19	29963353	*	-C	ENSBTAT00000035550, MYH13	DEL	FRAME_SHIFT
chr19	29976751	*	-T	ENSBTAT00000035550, MYH13	DEL	FRAME_SHIFT
chr19	33879553	*	+A	ENSBTAT00000065404, CENPV	INS	FRAME_SHIFT
chr19	33879551	*	-AA	ENSBTAT00000065404, CENPV	DEL	FRAME_SHIFT
chr19	34689366	*	+GG	ENSBTAT00000001347, MK07_BOVIN	INS	FRAME_SHIFT
chr19	35056221	*	+CT	ENSBTAT00000035016, MYO15A	INS	FRAME_SHIFT
chr19	35056263	*	-G	ENSBTAT00000035016, MYO15A	DEL	FRAME_SHIFT
chr19	35575414	*	+C	ENSBTAT00000013929, A7Z032_BOVIN	INS	FRAME_SHIFT
chr19	36776423	*	-C	ENSBTAT00000012985, CACNA1G	DEL	FRAME_SHIFT
chr19	36883075	*	+T	ENSBTAT00000028385, ACSF2_BOVIN	INS	FRAME_SHIFT
chr19	38563602	*	-T	ENSBTAT00000043402, HOXB4	DEL	FRAME_SHIFT
chr19	40304880	*	-G	ENSBTAT00000043189, CACB1_BOVIN	DEL	FRAME_SHIFT
chr19	41729106	*	-ACTGAACTGA	ENSBTAT00000010255, KRT20	DEL	FRAME_SHIFT
chr19	42004266	*	+T	ENSBTAT00000043145, ENSBTAG00000039880	INS	FRAME_SHIFT
chr19	42102255	*	-C	ENSBTAT00000002201, KRTAP9-2	DEL	FRAME_SHIFT
chr19	42102266	*	+ATCC	ENSBTAT00000002201, KRTAP9-2	INS	FRAME_SHIFT
chr19	42102819	*	-C	ENSBTAT00000002201, KRTAP9-2	DEL	FRAME_SHIFT
chr19	42820528	*	+A	ENSBTAT00000065588, ZNF385C	INS	FRAME_SHIFT
chr19	42820584	*	+C	ENSBTAT00000065588, ZNF385C	INS	FRAME_SHIFT
chr19	45123148	*	-AAAAAAA	ENSBTAT00000002276, ADAM11	DEL	FRAME_SHIFT
chr19	45123155	*	+CTTCGTC	ENSBTAT00000002276, ADAM11	INS	FRAME_SHIFT
chr19	45514380	*	-GCTCCTGGAGCAGCAGAGCCC	ENSBTAT00000034825, FMNL1	DEL	FRAME_SHIFT
chr19	47057946	*	-TAAA	ENSBTAT00000002128, C17orf57	DEL	FRAME_SHIFT
chr19	47740474	*	-AG	ENSBTAT00000020897, MRC2	DEL	FRAME_SHIFT
chr19	48447170	*	-C	ENSBTAT00000057531, ENSBTAG00000047866	DEL	FRAME_SHIFT
chr19	48551134	*	-T	ENSBTAT00000013031, E1BJK7_BOVIN	DEL	FRAME_SHIFT
chr19	48795462	*	-TT	ENSBTAT00000006265, E1B9X0_BOVIN	DEL	FRAME_SHIFT
chr19	51505096	*	-TTTTTTT	ENSBTAT00000006075, ENSBTAG00000004632	DEL	FRAME_SHIFT
chr19	51930813	*	-G	ENSBTAT00000022317, BAHCC1	DEL	FRAME_SHIFT
chr19	52193680	*	+T	ENSBTAT00000025356, F1MIB7_BOVIN	INS	FRAME_SHIFT
chr19	53335106	*	-A	ENSBTAT00000042590, CBX4	DEL	FRAME_SHIFT
chr19	53336963	*	-AA	ENSBTAT00000042590, CBX4	DEL	FRAME_SHIFT
chr19	53336974	*	-AAAAAAAAATAT	ENSBTAT00000042590, CBX4	DEL	FRAME_SHIFT
chr19	54258673	*	+A	ENSBTAT00000008751, CYTH1	INS	FRAME_SHIFT
chr19	54537858	*	+C	ENSBTAT00000011887, ENSBTAG00000009029	INS	FRAME_SHIFT
chr19	55567825	*	-T	ENSBTAT00000006729, A6QNY6_BOVIN	DEL	FRAME_SHIFT
chr19	55812175	*	-G	ENSBTAT00000042557, Q148L9_BOVIN	DEL	FRAME_SHIFT
chr19	55979409	*	+G	ENSBTAT00000011212, SPHK1	INS	FRAME_SHIFT
chr19	56426978	*	+T	ENSBTAT00000021663, A1A4K6_BOVIN	INS	FRAME_SHIFT
chr19	56475609	*	-C	ENSBTAT00000042566, ENSBTAG00000018169	DEL	FRAME_SHIFT
chr19	56978092	*	+G	ENSBTAT00000001467, SLC16A5	INS	FRAME_SHIFT
chr19	57088987	*	-C	ENSBTAT00000014318, C19H17orf28	DEL	FRAME_SHIFT
chr19	57577512	*	+T	ENSBTAT00000010966, A6QPS6_BOVIN	INS	FRAME_SHIFT
chr19	57577667	*	-AGAG	ENSBTAT00000010966, A6QPS6_BOVIN	DEL	FRAME_SHIFT
chr19	57721929	*	-C	ENSBTAT00000042549, BTBD17	DEL	FRAME_SHIFT
chr19	57721967	*	-G	ENSBTAT00000042549, BTBD17	DEL	FRAME_SHIFT
chr19	57722095	*	-T	ENSBTAT00000042549, BTBD17	DEL	FRAME_SHIFT
chr19	57726130	*	+TC	ENSBTAT00000006057, E1BFF4_BOVIN	INS	FRAME_SHIFT
chr19	57798554	*	+CG	ENSBTAT00000014618, A7YWH0_BOVIN	INS	FRAME_SHIFT
chr19	58439820	*	+G	ENSBTAT00000061463, SDK2	INS	FRAME_SHIFT
chr19	62595260	*	+G	ENSBTAT00000064657, ENSBTAG00000047055	INS	FRAME_SHIFT
chr19	62603381	*	-TGGGC	ENSBTAT00000064657, ENSBTAG00000047055	DEL	FRAME_SHIFT
chr19	62608563	*	-GCCGGAAGTGGCCGCC	ENSBTAT00000064657, ENSBTAG00000047055	DEL	FRAME_SHIFT
chr20	15083	*	-C	ENSBTAT00000054517, ENSBTAG00000038537	DEL	FRAME_SHIFT
chr20	68011	*	-AA	ENSBTAT00000056197, ENSBTAG00000000617	DEL	FRAME_SHIFT
chr20	347777	*	+G	ENSBTAT00000049620, SLIT3	INS	FRAME_SHIFT
chr20	347823	*	+C	ENSBTAT00000049620, SLIT3	INS	FRAME_SHIFT
chr20	3005074	*	-A	ENSBTAT00000030757, ENSBTAG00000022684	DEL	FRAME_SHIFT
chr20	3005206	*	-T	ENSBTAT00000030757, ENSBTAG00000022684	DEL	FRAME_SHIFT
chr20	4094219	*	+GAGA	ENSBTAT00000011874, SH3PXD2B	INS	FRAME_SHIFT
chr20	10127326	*	-C	ENSBTAT00000040362, GTF2H2	DEL	FRAME_SHIFT
chr20	10127371	*	-T	ENSBTAT00000040362, GTF2H2	DEL	FRAME_SHIFT
chr20	11746153	*	+C	ENSBTAT00000064169, DYL1_BOVIN	INS	FRAME_SHIFT
chr20	13414825	*	-CTTTG	ENSBTAT00000009630, SREK1	DEL	FRAME_SHIFT
chr20	24036587	*	-T	ENSBTAT00000029273, GZMA	DEL	FRAME_SHIFT
chr20	24036588	*	-G	ENSBTAT00000029273, GZMA	DEL	FRAME_SHIFT
chr20	24036725	*	+C	ENSBTAT00000029273, GZMA	INS	FRAME_SHIFT
chr20	32618787	*	-G	ENSBTAT00000022583, FBXO4	DEL	FRAME_SHIFT
chr20	35525208	*	-T	ENSBTAT00000061133, OSMR	DEL	FRAME_SHIFT
chr20	35542234	*	-ATCTT	ENSBTAT00000061133, OSMR	DEL	FRAME_SHIFT
chr20	35542234	*	-ATCTT	ENSBTAT00000047019, OSMR	DEL	FRAME_SHIFT
chr20	38147605	*	-C	ENSBTAT00000026829, LMBRD2	DEL	FRAME_SHIFT
chr20	39281009	*	+TGTGTGTGTGTGTG	ENSBTAT00000065472, TTC23L	INS	FRAME_SHIFT
chr20	39281009	*	+TGTGTGTG	ENSBTAT00000065472, TTC23L	INS	FRAME_SHIFT
chr20	39281009	*	+TGTGTGTGTG	ENSBTAT00000065472, TTC23L	INS	FRAME_SHIFT
chr20	57027195	*	-CC	ENSBTAT00000018034, MARCH11	DEL	FRAME_SHIFT
chr20	57027217	*	-A	ENSBTAT00000038546, MARCH11	DEL	FRAME_SHIFT
chr20	57027217	*	-A	ENSBTAT00000018034, MARCH11	DEL	FRAME_SHIFT
chr20	57027701	*	-C	ENSBTAT00000038546, MARCH11	DEL	FRAME_SHIFT
chr20	58893836	*	-T	ENSBTAT00000061086, A6QQZ8_BOVIN	DEL	FRAME_SHIFT
chr20	65430588	*	-TA	ENSBTAT00000012372, MTRR	DEL	FRAME_SHIFT
chr20	68074388	*	+A	ENSBTAT00000024569, ADAMTS16	INS	FRAME_SHIFT
chr20	68074389	*	+AACAC	ENSBTAT00000024569, ADAMTS16	INS	FRAME_SHIFT
chr20	68074390	*	-C	ENSBTAT00000024569, ADAMTS16	DEL	FRAME_SHIFT
chr20	71801264	*	+C	ENSBTAT00000011351, AHRR	INS	FRAME_SHIFT
chr21	5673101	*	-TT	ENSBTAT00000002052, LRRK1	DEL	FRAME_SHIFT
chr21	20086080	*	-AG	ENSBTAT00000001728, MGC148762	DEL	FRAME_SHIFT
chr21	20086401	*	+A	ENSBTAT00000001728, MGC148762	INS	FRAME_SHIFT
chr21	20086802	*	-TA	ENSBTAT00000001728, MGC148762	DEL	FRAME_SHIFT
chr21	20086806	*	+CA	ENSBTAT00000001728, MGC148762	INS	FRAME_SHIFT
chr21	20086820	*	-AATC	ENSBTAT00000001728, MGC148762	DEL	FRAME_SHIFT
chr21	20086828	*	-T	ENSBTAT00000001728, MGC148762	DEL	FRAME_SHIFT
chr21	20086832	*	-G	ENSBTAT00000001728, MGC148762	DEL	FRAME_SHIFT
chr21	20086835	*	-TG	ENSBTAT00000001728, MGC148762	DEL	FRAME_SHIFT
[truncated: 711 more rows]

## Sheet: NZDC_coding_SNPs
NZDC coding SNPs
Chromosome	Position	Reference allele	Alternative allele	Transcript_ID, Gene_ID	Amino acide change	Annotation
chr1	70600	T	C	ENSBTAT00000052762, ENSBTAG00000039257	H->R	missense
chr1	70715	G	A	ENSBTAT00000052762, ENSBTAG00000039257	R->*	stop-gain
chr1	70826	A	T	ENSBTAT00000052762, ENSBTAG00000039257	F->I	missense
chr1	124921	T	C	ENSBTAT00000002299, ENSBTAG00000001753	T->A	missense
chr1	125012	G	A	ENSBTAT00000002299, ENSBTAG00000001753	I->I	synonymous
chr1	137161	C	G	ENSBTAT00000002299, ENSBTAG00000001753	E->Q	missense
chr1	179024	C	T	ENSBTAT00000002299, ENSBTAG00000001753	A->A	synonymous
chr1	179057	C	T	ENSBTAT00000002299, ENSBTAG00000001753	A->A	synonymous
chr1	179119	C	T	ENSBTAT00000002299, ENSBTAG00000001753	V->M	missense
chr1	179241	G	C	ENSBTAT00000002299, ENSBTAG00000001753	P->R	missense
chr1	179388	C	A	ENSBTAT00000002299, ENSBTAG00000001753	R->L	missense
chr1	179676	C	G	ENSBTAT00000002299, ENSBTAG00000001753	R->P	missense
chr1	264765	G	A	ENSBTAT00000007283, ENSBTAG00000005540	P->S	missense
chr1	264803	T	A	ENSBTAT00000007283, ENSBTAG00000005540	K->M	missense
chr1	264831	T	A	ENSBTAT00000007283, ENSBTAG00000005540	K->*	stop-gain
chr1	407146	T	C	ENSBTAT00000001530, ENSBTAG00000001150	A->A	synonymous
chr1	407146	T	C	NM_001077977, KCNE1	A->A	synonymous
chr1	407202	T	C	ENSBTAT00000001530, ENSBTAG00000001150	M->T	missense
chr1	407202	T	C	NM_001077977, KCNE1	M->T	missense
chr1	407227	G	A	ENSBTAT00000001530, ENSBTAG00000001150	P->P	synonymous
chr1	407227	G	A	NM_001077977, KCNE1	P->P	synonymous
chr1	422252	G	A	ENSBTAT00000037244, ENSBTAG00000026259	C->Y	missense
chr1	422257	G	C	ENSBTAT00000037244, ENSBTAG00000026259	D->H	missense
chr1	460048	C	T	ENSBTAT00000018387, ENSBTAG00000013841	R->Q	missense
chr1	460048	C	T	NM_001077124, MGC134427	R->Q	missense
chr1	460117	C	A	ENSBTAT00000018387, ENSBTAG00000013841	S->I	missense
chr1	460117	C	A	NM_001077124, MGC134427	S->I	missense
chr1	460354	T	C	ENSBTAT00000018387, ENSBTAG00000013841	K->R	missense
chr1	460354	T	C	NM_001077124, MGC134427	K->R	missense
chr1	460375	G	T	ENSBTAT00000018387, ENSBTAG00000013841	A->E	missense
chr1	460375	G	T	NM_001077124, MGC134427	A->E	missense
chr1	460409	C	T	ENSBTAT00000018387, ENSBTAG00000013841	A->T	missense
chr1	460409	C	T	NM_001077124, MGC134427	A->T	missense
chr1	460554	T	G	ENSBTAT00000018387, ENSBTAG00000013841	T->T	synonymous
chr1	460554	T	G	NM_001077124, MGC134427	T->T	synonymous
chr1	460661	A	G	ENSBTAT00000018387, ENSBTAG00000013841	L->L	synonymous
chr1	460661	A	G	NM_001077124, MGC134427	L->L	synonymous
chr1	460734	G	A	ENSBTAT00000018387, ENSBTAG00000013841	N->N	synonymous
chr1	460734	G	A	NM_001077124, MGC134427	N->N	synonymous
chr1	466250	T	C	ENSBTAT00000015319, ENSBTAG00000011528	K->K	synonymous
chr1	466250	T	C	NM_001114516, SMIM11	K->K	synonymous
chr1	466306	A	G	ENSBTAT00000015319, ENSBTAG00000011528	L->L	synonymous
chr1	466306	A	G	NM_001114516, SMIM11	L->L	synonymous
chr1	466334	G	A	ENSBTAT00000015319, ENSBTAG00000011528	A->A	synonymous
chr1	466334	G	A	NM_001114516, SMIM11	A->A	synonymous
chr1	485206	C	T	ENSBTAT00000037245, ENSBTAG00000026260	R->H	missense
chr1	485206	C	T	NM_001077084, KCNE2	R->H	missense
chr1	559529	T	C	ENSBTAT00000064418, ENSBTAG00000045984	I->T	missense
chr1	559873	A	G	ENSBTAT00000064418, ENSBTAG00000045984	Q->R	missense
chr1	709892	A	G	NM_174607, SLC5A3	H->H	synonymous
chr1	709964	C	T	NM_174607, SLC5A3	P->P	synonymous
chr1	710093	C	T	NM_174607, SLC5A3	A->A	synonymous
chr1	710213	G	A	NM_174607, SLC5A3	G->G	synonymous
chr1	710498	G	A	NM_174607, SLC5A3	I->I	synonymous
chr1	929460	G	A	ENSBTAT00000024326, ENSBTAG00000018278	A->T	missense
chr1	929460	G	A	NM_174244, ATP5O	A->T	missense
chr1	929522	G	A	ENSBTAT00000024326, ENSBTAG00000018278	K->K	synonymous
chr1	929522	G	A	NM_174244, ATP5O	K->K	synonymous
chr1	929525	A	G	ENSBTAT00000024326, ENSBTAG00000018278	L->L	synonymous
chr1	929525	A	G	NM_174244, ATP5O	L->L	synonymous
chr1	948299	A	G	ENSBTAT00000029333, ENSBTAG00000021997	C->C	synonymous
chr1	950374	G	A	ENSBTAT00000029333, ENSBTAG00000021997	I->I	synonymous
chr1	950774	C	A	ENSBTAT00000029333, ENSBTAG00000021997	A->A	synonymous
chr1	951873	C	T	ENSBTAT00000029333, ENSBTAG00000021997	E->E	synonymous
chr1	954066	T	C	ENSBTAT00000029333, ENSBTAG00000021997	N->S	missense
chr1	958050	T	C	ENSBTAT00000029333, ENSBTAG00000021997	S->S	synonymous
chr1	958055	A	G	ENSBTAT00000029333, ENSBTAG00000021997	L->L	synonymous
chr1	958125	A	G	ENSBTAT00000029333, ENSBTAG00000021997	N->N	synonymous
chr1	958149	C	T	ENSBTAT00000029333, ENSBTAG00000021997	A->A	synonymous
chr1	975072	T	C	ENSBTAT00000029333, ENSBTAG00000021997	R->R	synonymous
chr1	998835	G	A	ENSBTAT00000029333, ENSBTAG00000021997	T->M	missense
chr1	998835	G	A	ENSBTAT00000065213, ENSBTAG00000021997	T->M	missense
chr1	1000956	C	T	ENSBTAT00000029333, ENSBTAG00000021997	P->P	synonymous
chr1	1000956	C	T	ENSBTAT00000065213, ENSBTAG00000021997	P->P	synonymous
chr1	1004445	A	G	ENSBTAT00000029333, ENSBTAG00000021997	-	splice-site
chr1	1004445	A	G	ENSBTAT00000065213, ENSBTAG00000021997	-	splice-site
chr1	1004522	C	T	ENSBTAT00000029333, ENSBTAG00000021997	Q->Q	synonymous
chr1	1004522	C	T	ENSBTAT00000065213, ENSBTAG00000021997	Q->Q	synonymous
chr1	1004561	C	T	ENSBTAT00000029333, ENSBTAG00000021997	A->A	synonymous
chr1	1004561	C	T	ENSBTAT00000065213, ENSBTAG00000021997	A->A	synonymous
chr1	1016577	G	A	ENSBTAT00000029333, ENSBTAG00000021997	D->D	synonymous
chr1	1016577	G	A	ENSBTAT00000065213, ENSBTAG00000021997	D->D	synonymous
chr1	1016637	T	C	ENSBTAT00000029333, ENSBTAG00000021997	A->A	synonymous
chr1	1016637	T	C	ENSBTAT00000065213, ENSBTAG00000021997	A->A	synonymous
chr1	1022534	G	A	ENSBTAT00000029333, ENSBTAG00000021997	S->S	synonymous
chr1	1022534	G	A	ENSBTAT00000065213, ENSBTAG00000021997	S->S	synonymous
chr1	1022608	A	G	ENSBTAT00000029333, ENSBTAG00000021997	C->R	missense
chr1	1022608	A	G	ENSBTAT00000065213, ENSBTAG00000021997	C->R	missense
chr1	1071455	A	C	ENSBTAT00000029333, ENSBTAG00000021997	-	splice-site
chr1	1071455	A	C	ENSBTAT00000065213, ENSBTAG00000021997	-	splice-site
chr1	1071640	C	T	ENSBTAT00000029333, ENSBTAG00000021997	E->E	synonymous
chr1	1071640	C	T	ENSBTAT00000065213, ENSBTAG00000021997	E->E	synonymous
chr1	1071700	C	T	ENSBTAT00000029333, ENSBTAG00000021997	K->K	synonymous
chr1	1071700	C	T	ENSBTAT00000065213, ENSBTAG00000021997	K->K	synonymous
chr1	1087324	T	G	ENSBTAT00000029333, ENSBTAG00000021997	P->P	synonymous
chr1	1087324	T	G	ENSBTAT00000065213, ENSBTAG00000021997	P->P	synonymous
chr1	1087330	T	A	ENSBTAT00000029333, ENSBTAG00000021997	T->T	synonymous
chr1	1087330	T	A	ENSBTAT00000065213, ENSBTAG00000021997	T->T	synonymous
chr1	1089045	G	A	ENSBTAT00000029333, ENSBTAG00000021997	P->L	missense
chr1	1089045	G	A	ENSBTAT00000065213, ENSBTAG00000021997	P->L	missense
chr1	1089073	T	C	ENSBTAT00000029333, ENSBTAG00000021997	I->V	missense
chr1	1089073	T	C	ENSBTAT00000065213, ENSBTAG00000021997	I->V	missense
chr1	1089173	T	C	ENSBTAT00000029333, ENSBTAG00000021997	V->V	synonymous
chr1	1089173	T	C	ENSBTAT00000065213, ENSBTAG00000021997	V->V	synonymous
chr1	1111267	T	C	ENSBTAT00000029333, ENSBTAG00000021997	E->G	missense
chr1	1111267	T	C	ENSBTAT00000065213, ENSBTAG00000021997	E->G	missense
chr1	1114143	G	A	ENSBTAT00000029333, ENSBTAG00000021997	P->P	synonymous
chr1	1114143	G	A	ENSBTAT00000065213, ENSBTAG00000021997	P->P	synonymous
chr1	1223900	G	T	ENSBTAT00000049671, ENSBTAG00000035175	G->W	missense
chr1	1223900	G	T	ENSBTAT00000049667, ENSBTAG00000035175	R->L	missense
chr1	1223900	G	T	NM_001083445, DONSON	R->L	missense
chr1	1224188	G	A	ENSBTAT00000049671, ENSBTAG00000035175	R->K	missense
chr1	1225753	C	T	ENSBTAT00000049667, ENSBTAG00000035175	L->L	synonymous
chr1	1225753	C	T	ENSBTAT00000049671, ENSBTAG00000035175	L->L	synonymous
chr1	1225753	C	T	NM_001083445, DONSON	L->L	synonymous
chr1	1226934	T	C	ENSBTAT00000049667, ENSBTAG00000035175	H->H	synonymous
chr1	1226934	T	C	ENSBTAT00000049671, ENSBTAG00000035175	H->H	synonymous
chr1	1226934	T	C	NM_001083445, DONSON	H->H	synonymous
chr1	1228277	G	T	ENSBTAT00000049667, ENSBTAG00000035175	D->Y	missense
chr1	1228277	G	T	ENSBTAT00000049671, ENSBTAG00000035175	D->Y	missense
chr1	1228277	G	T	NM_001083445, DONSON	D->Y	missense
chr1	1229003	G	A	ENSBTAT00000049667, ENSBTAG00000035175	G->D	missense
chr1	1229003	G	A	ENSBTAT00000049671, ENSBTAG00000035175	G->D	missense
chr1	1229003	G	A	NM_001083445, DONSON	G->D	missense
chr1	1231574	C	G	ENSBTAT00000049667, ENSBTAG00000035175	S->C	missense
chr1	1231574	C	G	ENSBTAT00000049671, ENSBTAG00000035175	S->C	missense
chr1	1231574	C	G	NM_001083445, DONSON	S->C	missense
chr1	1231694	A	T	ENSBTAT00000049667, ENSBTAG00000035175	D->V	missense
chr1	1231694	A	T	ENSBTAT00000049671, ENSBTAG00000035175	D->V	missense
chr1	1231694	A	T	NM_001083445, DONSON	D->V	missense
chr1	1235585	G	A	ENSBTAT00000011175, ENSBTAG00000008482	S->S	synonymous
chr1	1235585	G	A	NM_001083694, SON	S->S	synonymous
chr1	1253819	T	C	ENSBTAT00000011175, ENSBTAG00000008482	T->T	synonymous
chr1	1253819	T	C	NM_001083694, SON	T->T	synonymous
chr1	1253984	A	G	ENSBTAT00000011175, ENSBTAG00000008482	S->S	synonymous
chr1	1253984	A	G	NM_001083694, SON	S->S	synonymous
chr1	1254004	G	T	ENSBTAT00000011175, ENSBTAG00000008482	R->R	synonymous
chr1	1254004	G	T	NM_001083694, SON	R->R	synonymous
chr1	1254008	C	A	ENSBTAT00000011175, ENSBTAG00000008482	P->P	synonymous
chr1	1254008	C	A	NM_001083694, SON	P->P	synonymous
chr1	1254014	C	G	ENSBTAT00000011175, ENSBTAG00000008482	R->R	synonymous
chr1	1254014	C	G	NM_001083694, SON	R->R	synonymous
chr1	1254022	G	T	ENSBTAT00000011175, ENSBTAG00000008482	R->R	synonymous
chr1	1254022	G	T	NM_001083694, SON	R->R	synonymous
chr1	1254025	T	G	ENSBTAT00000011175, ENSBTAG00000008482	R->R	synonymous
chr1	1254025	T	G	NM_001083694, SON	R->R	synonymous
chr1	1254029	A	T	ENSBTAT00000011175, ENSBTAG00000008482	P->P	synonymous
chr1	1254029	A	T	NM_001083694, SON	P->P	synonymous
chr1	1254064	T	G	ENSBTAT00000011175, ENSBTAG00000008482	R->R	synonymous
chr1	1254064	T	G	NM_001083694, SON	R->R	synonymous
chr1	1254284	C	T	ENSBTAT00000011175, ENSBTAG00000008482	P->P	synonymous
chr1	1254284	C	T	NM_001083694, SON	P->P	synonymous
chr1	1254533	G	A	ENSBTAT00000011175, ENSBTAG00000008482	G->G	synonymous
chr1	1254533	G	A	NM_001083694, SON	G->G	synonymous
chr1	1254885	G	A	ENSBTAT00000011175, ENSBTAG00000008482	A->V	missense
chr1	1254885	G	A	NM_001083694, SON	A->V	missense
chr1	1254918	G	A	ENSBTAT00000011175, ENSBTAG00000008482	P->L	missense
chr1	1254918	G	A	NM_001083694, SON	P->L	missense
chr1	1255146	A	G	ENSBTAT00000011175, ENSBTAG00000008482	V->A	missense
chr1	1255146	A	G	NM_001083694, SON	V->A	missense
chr1	1255177	C	G	ENSBTAT00000011175, ENSBTAG00000008482	V->L	missense
chr1	1255177	C	G	NM_001083694, SON	V->L	missense
chr1	1255477	T	C	ENSBTAT00000011175, ENSBTAG00000008482	I->V	missense
chr1	1255477	T	C	NM_001083694, SON	I->V	missense
chr1	1256174	A	C	ENSBTAT00000011175, ENSBTAG00000008482	S->S	synonymous
chr1	1256174	A	C	NM_001083694, SON	S->S	synonymous
chr1	1256422	C	T	ENSBTAT00000011175, ENSBTAG00000008482	A->T	missense
chr1	1256422	C	T	NM_001083694, SON	A->T	missense
chr1	1258941	G	A	ENSBTAT00000011175, ENSBTAG00000008482	P->L	missense
chr1	1258941	G	A	NM_001083694, SON	P->L	missense
chr1	1259003	C	T	ENSBTAT00000011175, ENSBTAG00000008482	T->T	synonymous
chr1	1259003	C	T	NM_001083694, SON	T->T	synonymous
chr1	1274831	C	T	ENSBTAT00000012108, ENSBTAG00000009188	F->F	synonymous
chr1	1274831	C	T	NM_001040473, GART	F->F	synonymous
chr1	1276674	A	G	ENSBTAT00000012108, ENSBTAG00000009188	P->P	synonymous
chr1	1276674	A	G	NM_001040473, GART	P->P	synonymous
chr1	1277474	G	A	ENSBTAT00000012108, ENSBTAG00000009188	D->N	missense
chr1	1277474	G	A	NM_001040473, GART	D->N	missense
chr1	1283152	T	C	ENSBTAT00000012108, ENSBTAG00000009188	G->G	synonymous
chr1	1283152	T	C	NM_001040473, GART	G->G	synonymous
chr1	1283702	G	T	ENSBTAT00000012108, ENSBTAG00000009188	A->S	missense
chr1	1283702	G	T	NM_001040473, GART	A->S	missense
chr1	1284811	G	A	ENSBTAT00000012108, ENSBTAG00000009188	G->D	missense
chr1	1284811	G	A	NM_001040473, GART	G->D	missense
chr1	1287657	A	G	ENSBTAT00000012108, ENSBTAG00000009188	K->E	missense
chr1	1287657	A	G	NM_001040473, GART	K->E	missense
chr1	1288846	A	G	ENSBTAT00000012108, ENSBTAG00000009188	P->P	synonymous
chr1	1288846	A	G	NM_001040473, GART	P->P	synonymous
chr1	1289881	A	G	ENSBTAT00000012108, ENSBTAG00000009188	S->S	synonymous
chr1	1289881	A	G	NM_001040473, GART	S->S	synonymous
chr1	1289971	G	C	ENSBTAT00000012108, ENSBTAG00000009188	G->G	synonymous
chr1	1289971	G	C	NM_001040473, GART	G->G	synonymous
chr1	1308538	G	C	ENSBTAT00000012106, ENSBTAG00000009187	T->T	synonymous
chr1	1308624	T	G	ENSBTAT00000012106, ENSBTAG00000009187	V->G	missense
chr1	1308718	A	C	ENSBTAT00000012106, ENSBTAG00000009187	A->A	synonymous
chr1	1308749	G	A	ENSBTAT00000012106, ENSBTAG00000009187	A->T	missense
chr1	1308807	G	C	ENSBTAT00000012106, ENSBTAG00000009187	R->T	missense
chr1	1309072	C	T	ENSBTAT00000012106, ENSBTAG00000009187	D->D	synonymous
chr1	1309122	G	A	ENSBTAT00000012106, ENSBTAG00000009187	R->Q	missense
chr1	1309329	T	C	ENSBTAT00000012106, ENSBTAG00000009187	I->T	missense
chr1	1309516	T	C	ENSBTAT00000012106, ENSBTAG00000009187	D->D	synonymous
chr1	1309537	A	G	ENSBTAT00000012106, ENSBTAG00000009187	R->R	synonymous
chr1	1343060	C	T	ENSBTAT00000001660, ENSBTAG00000001258	C->C	synonymous
chr1	1343060	C	T	NM_001034786, TMEM50B	C->C	synonymous
chr1	1346502	T	C	ENSBTAT00000001660, ENSBTAG00000001258	N->N	synonymous
chr1	1346502	T	C	NM_001034786, TMEM50B	N->N	synonymous
chr1	1376843	G	A	ENSBTAT00000017147, ENSBTAG00000012899	T->M	missense
chr1	1376880	T	A	ENSBTAT00000017147, ENSBTAG00000012899	T->S	missense
chr1	1376884	T	C	ENSBTAT00000017147, ENSBTAG00000012899	Q->Q	synonymous
chr1	1376932	A	G	ENSBTAT00000017147, ENSBTAG00000012899	S->S	synonymous
chr1	1376977	A	G	ENSBTAT00000017147, ENSBTAG00000012899	D->D	synonymous
chr1	1390505	T	C	ENSBTAT00000017147, ENSBTAG00000012899	R->G	missense
chr1	1471263	A	C	ENSBTAT00000029080, ENSBTAG00000021819	F->V	missense
chr1	1471263	A	C	NM_174552, IFNAR1	F->V	missense
chr1	1475148	G	A	ENSBTAT00000029080, ENSBTAG00000021819	S->S	synonymous
chr1	1475148	G	A	NM_174552, IFNAR1	S->S	synonymous
chr1	1480094	G	A	ENSBTAT00000029080, ENSBTAG00000021819	T->M	missense
chr1	1480094	G	A	NM_174552, IFNAR1	T->M	missense
chr1	1480240	C	T	ENSBTAT00000029080, ENSBTAG00000021819	V->I	missense
chr1	1480240	C	T	NM_174552, IFNAR1	V->I	missense
chr1	1482779	C	T	ENSBTAT00000029080, ENSBTAG00000021819	G->G	synonymous
chr1	1482779	C	T	NM_174552, IFNAR1	G->G	synonymous
chr1	1482803	C	T	ENSBTAT00000029080, ENSBTAG00000021819	T->T	synonymous
chr1	1482803	C	T	NM_174552, IFNAR1	T->T	synonymous
chr1	1564118	A	G	ENSBTAT00000025852, ENSBTAG00000019404	S->S	synonymous
chr1	1564118	A	G	NM_001076975, IL10RB	S->S	synonymous
chr1	1577741	G	T	ENSBTAT00000025852, ENSBTAG00000019404	N->K	missense
chr1	1577741	G	T	NM_001076975, IL10RB	N->K	missense
chr1	1577769	C	T	ENSBTAT00000025852, ENSBTAG00000019404	R->Q	missense
chr1	1577769	C	T	NM_001076975, IL10RB	R->Q	missense
chr1	1577777	A	G	ENSBTAT00000025852, ENSBTAG00000019404	Y->Y	synonymous
chr1	1577777	A	G	NM_001076975, IL10RB	Y->Y	synonymous
chr1	1577835	A	G	ENSBTAT00000025852, ENSBTAG00000019404	L->S	missense
chr1	1577835	A	G	NM_001076975, IL10RB	L->S	missense
chr1	1582897	T	C	ENSBTAT00000025852, ENSBTAG00000019404	Q->R	missense
chr1	1582897	T	C	NM_001076975, IL10RB	Q->R	missense
chr1	1582959	A	G	ENSBTAT00000025852, ENSBTAG00000019404	I->I	synonymous
chr1	1582959	A	G	NM_001076975, IL10RB	I->I	synonymous
chr1	1584650	C	T	ENSBTAT00000025852, ENSBTAG00000019404	L->L	synonymous
chr1	1584650	C	T	NM_001076975, IL10RB	L->L	synonymous
chr1	1591669	G	A	ENSBTAT00000025852, ENSBTAG00000019404	G->G	synonymous
chr1	1591669	G	A	NM_001076975, IL10RB	G->G	synonymous
chr1	1594372	C	T	ENSBTAT00000020239, ENSBTAG00000015212	V->V	synonymous
chr1	1594372	C	T	NM_174553, IFNAR2	V->V	synonymous
chr1	1594419	A	C	ENSBTAT00000020239, ENSBTAG00000015212	S->A	missense
chr1	1594419	A	C	NM_174553, IFNAR2	S->A	missense
chr1	1594783	G	A	ENSBTAT00000020239, ENSBTAG00000015212	T->T	synonymous
chr1	1594783	G	A	NM_174553, IFNAR2	T->T	synonymous
chr1	1608032	A	G	ENSBTAT00000020239, ENSBTAG00000015212	V->A	missense
chr1	1608032	A	G	NM_174553, IFNAR2	V->A	missense
chr1	1608168	C	T	ENSBTAT00000020239, ENSBTAG00000015212	D->N	missense
chr1	1608168	C	T	NM_174553, IFNAR2	D->N	missense
chr1	1608175	G	C	ENSBTAT00000020239, ENSBTAG00000015212	V->V	synonymous
chr1	1608175	G	C	NM_174553, IFNAR2	V->V	synonymous
chr1	1611689	G	T	ENSBTAT00000020239, ENSBTAG00000015212	I->I	synonymous
chr1	1611689	G	T	NM_174553, IFNAR2	I->I	synonymous
chr1	1615121	T	A	ENSBTAT00000020239, ENSBTAG00000015212	M->L	missense
chr1	1615121	T	A	NM_174553, IFNAR2	M->L	missense
chr1	2047678	G	A	ENSBTAT00000061032, ENSBTAG00000043993	A->T	missense
chr1	2047678	G	A	NM_001163694, C1H21orf62	A->T	missense
chr1	2047849	A	G	ENSBTAT00000061032, ENSBTAG00000043993	I->V	missense
chr1	2047849	A	G	NM_001163694, C1H21orf62	I->V	missense
chr1	2048097	G	A	ENSBTAT00000061032, ENSBTAG00000043993	K->K	synonymous
chr1	2048097	G	A	NM_001163694, C1H21orf62	K->K	synonymous
chr1	2048172	C	T	ENSBTAT00000061032, ENSBTAG00000043993	S->S	synonymous
chr1	2048172	C	T	NM_001163694, C1H21orf62	S->S	synonymous
chr1	2076954	A	G	ENSBTAT00000003986, ENSBTAG00000003064	T->T	synonymous
chr1	2076954	A	G	NM_001075689, GCFC1	T->T	synonymous
chr1	2077047	C	T	ENSBTAT00000003986, ENSBTAG00000003064	S->S	synonymous
chr1	2077047	C	T	NM_001075689, GCFC1	S->S	synonymous
chr1	2085310	A	G	ENSBTAT00000003986, ENSBTAG00000003064	T->T	synonymous
chr1	2085310	A	G	NM_001075689, GCFC1	T->T	synonymous
chr1	2096575	G	A	ENSBTAT00000003986, ENSBTAG00000003064	V->I	missense
chr1	2096575	G	A	NM_001075689, GCFC1	V->I	missense
chr1	2135913	G	A	ENSBTAT00000003984, ENSBTAG00000003063	L->L	synonymous
chr1	2135913	G	A	ENSBTAT00000003985, ENSBTAG00000003063	L->L	synonymous
chr1	2135913	G	A	NM_174468, SYNJ1	L->L	synonymous
chr1	2155063	A	G	ENSBTAT00000003984, ENSBTAG00000003063	S->G	missense
chr1	2155063	A	G	ENSBTAT00000003985, ENSBTAG00000003063	S->G	missense
chr1	2155063	A	G	NM_174468, SYNJ1	S->G	missense
chr1	2161560	C	T	ENSBTAT00000003984, ENSBTAG00000003063	L->F	missense
chr1	2161560	C	T	ENSBTAT00000003985, ENSBTAG00000003063	L->F	missense
chr1	2161560	C	T	NM_174468, SYNJ1	L->F	missense
chr1	2168401	C	T	ENSBTAT00000003984, ENSBTAG00000003063	G->G	synonymous
chr1	2168401	C	T	ENSBTAT00000003985, ENSBTAG00000003063	G->G	synonymous
chr1	2168401	C	T	NM_174468, SYNJ1	G->G	synonymous
chr1	2170759	A	G	ENSBTAT00000003984, ENSBTAG00000003063	P->P	synonymous
chr1	2170759	A	G	ENSBTAT00000003985, ENSBTAG00000003063	P->P	synonymous
chr1	2170759	A	G	NM_174468, SYNJ1	P->P	synonymous
chr1	2179929	T	C	ENSBTAT00000003984, ENSBTAG00000003063	Y->Y	synonymous
chr1	2179929	T	C	ENSBTAT00000003985, ENSBTAG00000003063	Y->Y	synonymous
chr1	2179929	T	C	NM_174468, SYNJ1	Y->Y	synonymous
chr1	2185150	A	G	ENSBTAT00000003984, ENSBTAG00000003063	E->G	missense
chr1	2185150	A	G	ENSBTAT00000003985, ENSBTAG00000003063	G->G	synonymous
chr1	2185150	A	G	NM_174468, SYNJ1	G->G	synonymous
chr1	2189015	G	A	ENSBTAT00000003985, ENSBTAG00000003063	A->A	synonymous
chr1	2189015	G	A	NM_174468, SYNJ1	A->A	synonymous
chr1	2209470	T	C	ENSBTAT00000003977, ENSBTAG00000003059	S->S	synonymous
chr1	2209470	T	C	NM_001046407, C1H21orf59	S->S	synonymous
chr1	2214308	T	C	ENSBTAT00000003977, ENSBTAG00000003059	H->H	synonymous
chr1	2214308	T	C	NM_001046407, C1H21orf59	H->H	synonymous
chr1	2283389	C	T	ENSBTAT00000023019, ENSBTAG00000017310	A->A	synonymous
chr1	2283389	C	T	NM_001199027, EVA1C	A->A	synonymous
chr1	2283401	C	T	ENSBTAT00000023019, ENSBTAG00000017310	S->S	synonymous
chr1	2283401	C	T	NM_001199027, EVA1C	S->S	synonymous
chr1	2296259	G	T	ENSBTAT00000023019, ENSBTAG00000017310	P->H	missense
chr1	2296259	G	T	NM_001199027, EVA1C	P->H	missense
chr1	2296372	G	A	ENSBTAT00000023019, ENSBTAG00000017310	H->H	synonymous
chr1	2296372	G	A	NM_001199027, EVA1C	H->H	synonymous
chr1	2359906	G	A	ENSBTAT00000023019, ENSBTAG00000017310	S->S	synonymous
chr1	2359906	G	A	NM_001199027, EVA1C	S->S	synonymous
chr1	2359942	G	A	ENSBTAT00000023019, ENSBTAG00000017310	L->L	synonymous
chr1	2359942	G	A	NM_001199027, EVA1C	L->L	synonymous
chr1	2359960	T	C	ENSBTAT00000023019, ENSBTAG00000017310	V->V	synonymous
chr1	2359960	T	C	NM_001199027, EVA1C	V->V	synonymous
chr1	2382905	C	T	ENSBTAT00000016473, ENSBTAG00000012412	G->G	synonymous
chr1	2382905	C	T	NM_001205980, URB1	G->G	synonymous
chr1	2386374	G	A	ENSBTAT00000016473, ENSBTAG00000012412	E->K	missense
chr1	2386374	G	A	NM_001205980, URB1	E->K	missense
chr1	2387407	T	C	ENSBTAT00000016473, ENSBTAG00000012412	M->T	missense
chr1	2387407	T	C	NM_001205980, URB1	M->T	missense
chr1	2396140	A	G	ENSBTAT00000016473, ENSBTAG00000012412	E->E	synonymous
chr1	2396140	A	G	NM_001205980, URB1	E->E	synonymous
chr1	2397794	G	A	ENSBTAT00000016473, ENSBTAG00000012412	V->V	synonymous
chr1	2397794	G	A	NM_001205980, URB1	V->V	synonymous
chr1	2405215	C	G	ENSBTAT00000016473, ENSBTAG00000012412	I->M	missense
chr1	2405215	C	G	NM_001205980, URB1	I->M	missense
chr1	2407003	G	A	ENSBTAT00000016473, ENSBTAG00000012412	A->T	missense
chr1	2407003	G	A	NM_001205980, URB1	A->T	missense
chr1	2409990	C	T	ENSBTAT00000016473, ENSBTAG00000012412	G->G	synonymous
chr1	2409990	C	T	NM_001205980, URB1	G->G	synonymous
chr1	2410819	C	G	ENSBTAT00000016473, ENSBTAG00000012412	H->Q	missense
chr1	2410819	C	G	NM_001205980, URB1	H->Q	missense
chr1	2410868	A	G	ENSBTAT00000016473, ENSBTAG00000012412	M->V	missense
chr1	2410868	A	G	NM_001205980, URB1	M->V	missense
chr1	2413089	G	A	ENSBTAT00000016473, ENSBTAG00000012412	P->P	synonymous
chr1	2413089	G	A	NM_001205980, URB1	P->P	synonymous
chr1	2415018	A	C	ENSBTAT00000016473, ENSBTAG00000012412	P->P	synonymous
chr1	2415018	A	C	NM_001205980, URB1	P->P	synonymous
chr1	2416670	T	C	ENSBTAT00000016473, ENSBTAG00000012412	M->T	missense
chr1	2416670	T	C	NM_001205980, URB1	M->T	missense
chr1	2416713	C	T	ENSBTAT00000016473, ENSBTAG00000012412	R->R	synonymous
chr1	2416713	C	T	NM_001205980, URB1	R->R	synonymous
chr1	2419709	C	T	ENSBTAT00000016473, ENSBTAG00000012412	T->T	synonymous
chr1	2419709	C	T	NM_001205980, URB1	T->T	synonymous
chr1	2419867	T	G	ENSBTAT00000016473, ENSBTAG00000012412	L->R	missense
chr1	2419867	T	G	NM_001205980, URB1	L->R	missense
chr1	2421824	C	G	ENSBTAT00000016473, ENSBTAG00000012412	D->E	missense
chr1	2421824	C	G	NM_001205980, URB1	D->E	missense
chr1	2421917	C	T	ENSBTAT00000016473, ENSBTAG00000012412	S->S	synonymous
chr1	2421917	C	T	NM_001205980, URB1	S->S	synonymous
chr1	2422866	C	T	ENSBTAT00000016473, ENSBTAG00000012412	R->W	missense
chr1	2422866	C	T	NM_001205980, URB1	R->W	missense
chr1	2422979	G	A	ENSBTAT00000016473, ENSBTAG00000012412	E->E	synonymous
chr1	2422979	G	A	NM_001205980, URB1	E->E	synonymous
chr1	2424473	A	G	ENSBTAT00000016473, ENSBTAG00000012412	Q->R	missense
chr1	2424473	A	G	NM_001205980, URB1	Q->R	missense
chr1	2424824	C	T	ENSBTAT00000016473, ENSBTAG00000012412	P->L	missense
chr1	2424824	C	T	NM_001205980, URB1	P->L	missense
chr1	2424846	T	C	ENSBTAT00000016473, ENSBTAG00000012412	T->T	synonymous
chr1	2424846	T	C	NM_001205980, URB1	T->T	synonymous
chr1	2424936	G	T	ENSBTAT00000016473, ENSBTAG00000012412	V->V	synonymous
chr1	2424936	G	T	NM_001205980, URB1	V->V	synonymous
chr1	2425177	C	A	ENSBTAT00000016473, ENSBTAG00000012412	R->R	synonymous
chr1	2425177	C	A	NM_001205980, URB1	R->R	synonymous
chr1	2426124	G	A	ENSBTAT00000016473, ENSBTAG00000012412	A->T	missense
chr1	2426124	G	A	NM_001205980, URB1	A->T	missense
chr1	2426169	G	A	ENSBTAT00000016473, ENSBTAG00000012412	A->T	missense
chr1	2426169	G	A	NM_001205980, URB1	A->T	missense
chr1	2430476	C	T	ENSBTAT00000016473, ENSBTAG00000012412	T->T	synonymous
chr1	2430476	C	T	NM_001205980, URB1	T->T	synonymous
chr1	2432034	C	T	ENSBTAT00000016473, ENSBTAG00000012412	A->V	missense
chr1	2432034	C	T	NM_001205980, URB1	A->V	missense
chr1	2432051	C	T	ENSBTAT00000016473, ENSBTAG00000012412	R->C	missense
chr1	2432051	C	T	NM_001205980, URB1	R->C	missense
chr1	2432099	C	A	ENSBTAT00000016473, ENSBTAG00000012412	Q->K	missense
chr1	2432099	C	A	NM_001205980, URB1	Q->K	missense
chr1	2436537	G	T	ENSBTAT00000016473, ENSBTAG00000012412	R->R	synonymous
chr1	2436537	G	T	NM_001205980, URB1	R->R	synonymous
chr1	2436560	G	A	ENSBTAT00000016473, ENSBTAG00000012412	S->N	missense
chr1	2436560	G	A	NM_001205980, URB1	S->N	missense
chr1	2436571	G	C	ENSBTAT00000016473, ENSBTAG00000012412	A->P	missense
chr1	2436571	G	C	NM_001205980, URB1	A->P	missense
chr1	2437145	C	T	ENSBTAT00000016473, ENSBTAG00000012412	L->L	synonymous
chr1	2437145	C	T	NM_001205980, URB1	L->L	synonymous
chr1	2439309	G	A	ENSBTAT00000016473, ENSBTAG00000012412	L->L	synonymous
chr1	2439309	G	A	NM_001205980, URB1	L->L	synonymous
chr1	2439469	C	G	ENSBTAT00000016473, ENSBTAG00000012412	P->A	missense
chr1	2439469	C	G	NM_001205980, URB1	P->A	missense
chr1	2439863	T	C	ENSBTAT00000016473, ENSBTAG00000012412	D->D	synonymous
chr1	2439863	T	C	NM_001205980, URB1	D->D	synonymous
chr1	2451087	G	C	ENSBTAT00000016473, ENSBTAG00000012412	K->N	missense
chr1	2451087	G	C	NM_001205980, URB1	K->N	missense
chr1	2452014	G	A	ENSBTAT00000016473, ENSBTAG00000012412	V->I	missense
chr1	2452014	G	A	NM_001205980, URB1	V->I	missense
chr1	2452036	C	T	ENSBTAT00000016473, ENSBTAG00000012412	P->L	missense
chr1	2452036	C	T	NM_001205980, URB1	P->L	missense
chr1	2455302	C	T	ENSBTAT00000016473, ENSBTAG00000012412	Y->Y	synonymous
chr1	2455302	C	T	NM_001205980, URB1	Y->Y	synonymous
chr1	2456792	C	T	ENSBTAT00000016473, ENSBTAG00000012412	P->P	synonymous
chr1	2456792	C	T	NM_001205980, URB1	P->P	synonymous
chr1	2457684	C	T	ENSBTAT00000016473, ENSBTAG00000012412	L->L	synonymous
chr1	2457684	C	T	NM_001205980, URB1	L->L	synonymous
chr1	2457728	A	G	ENSBTAT00000016473, ENSBTAG00000012412	A->A	synonymous
chr1	2457728	A	G	NM_001205980, URB1	A->A	synonymous
chr1	2457853	A	G	ENSBTAT00000016473, ENSBTAG00000012412	E->G	missense
chr1	2457853	A	G	NM_001205980, URB1	E->G	missense
chr1	2459195	C	T	ENSBTAT00000016473, ENSBTAG00000012412	A->V	missense
chr1	2459195	C	T	NM_001205980, URB1	A->V	missense
chr1	2459252	C	T	ENSBTAT00000016473, ENSBTAG00000012412	T->I	missense
chr1	2459252	C	T	NM_001205980, URB1	T->I	missense
chr1	2466173	G	A	ENSBTAT00000032472, ENSBTAG00000023718	S->L	missense
chr1	2490314	G	A	ENSBTAT00000022106, ENSBTAG00000016619	C->Y	missense
chr1	2490314	G	A	NM_001098010, MIS18A	C->Y	missense
chr1	2490485	G	T	ENSBTAT00000022106, ENSBTAG00000016619	R->L	missense
chr1	2490485	G	T	NM_001098010, MIS18A	R->L	missense
chr1	2490580	G	A	ENSBTAT00000022106, ENSBTAG00000016619	A->T	missense
chr1	2490580	G	A	NM_001098010, MIS18A	A->T	missense
chr1	2498533	G	A	ENSBTAT00000022106, ENSBTAG00000016619	G->E	missense
chr1	2498533	G	A	NM_001098010, MIS18A	G->E	missense
chr1	2781526	T	G	ENSBTAT00000027668, ENSBTAG00000020762	H->P	missense
chr1	2781717	A	G	ENSBTAT00000027668, ENSBTAG00000020762	D->D	synonymous
chr1	2799600	G	A	ENSBTAT00000027668, ENSBTAG00000020762	T->T	synonymous
chr1	2799647	T	C	ENSBTAT00000027668, ENSBTAG00000020762	I->V	missense
chr1	2832375	G	A	ENSBTAT00000027668, ENSBTAG00000020762	T->T	synonymous
chr1	2870931	C	A	ENSBTAT00000027668, ENSBTAG00000020762	R->R	synonymous
chr1	2870946	A	G	ENSBTAT00000027668, ENSBTAG00000020762	V->V	synonymous
chr1	2917949	G	T	ENSBTAT00000027668, ENSBTAG00000020762	L->I	missense
chr1	3072652	A	G	ENSBTAT00000025104, ENSBTAG00000018855	L->L	synonymous
chr1	3072656	A	C	ENSBTAT00000025104, ENSBTAG00000018855	N->H	missense
chr1	3077207	A	C	ENSBTAT00000025104, ENSBTAG00000018855	E->D	missense
chr1	3082169	A	G	ENSBTAT00000025104, ENSBTAG00000018855	T->A	missense
chr1	3082603	A	G	ENSBTAT00000025104, ENSBTAG00000018855	P->P	synonymous
chr1	3088519	T	C	ENSBTAT00000025104, ENSBTAG00000018855	D->D	synonymous
chr1	3110546	A	C	ENSBTAT00000025104, ENSBTAG00000018855	Q->P	missense
chr1	3110718	T	C	ENSBTAT00000025104, ENSBTAG00000018855	G->G	synonymous
chr1	3110754	G	A	ENSBTAT00000025104, ENSBTAG00000018855	P->P	synonymous
chr1	3110838	G	T	ENSBTAT00000025104, ENSBTAG00000018855	P->P	synonymous
chr1	3110850	T	G	ENSBTAT00000025104, ENSBTAG00000018855	G->G	synonymous
chr1	3110924	C	T	ENSBTAT00000025104, ENSBTAG00000018855	P->L	missense
chr1	3110961	T	G	ENSBTAT00000025104, ENSBTAG00000018855	P->P	synonymous
chr1	3111276	A	G	ENSBTAT00000025104, ENSBTAG00000018855	K->K	synonymous
chr1	3116044	T	A	ENSBTAT00000032452, ENSBTAG00000018854	I->F	missense
chr1	3116044	T	A	NM_174615, SOD1	I->F	missense
chr1	3116983	G	C	ENSBTAT00000032452, ENSBTAG00000018854	T->T	synonymous
chr1	3116983	G	C	NM_174615, SOD1	T->T	synonymous
chr1	3122483	T	G	ENSBTAT00000032452, ENSBTAG00000018854	T->P	missense
chr1	3122483	T	G	NM_174615, SOD1	T->P	missense
chr1	3564737	G	C	ENSBTAT00000023716, ENSBTAG00000017839	D->H	missense
chr1	3564737	G	C	ENSBTAT00000064124, ENSBTAG00000017839	D->H	missense
chr1	3564853	G	A	ENSBTAT00000023716, ENSBTAG00000017839	P->P	synonymous
chr1	3564853	G	A	ENSBTAT00000064124, ENSBTAG00000017839	P->P	synonymous
chr1	3581587	C	T	ENSBTAT00000023716, ENSBTAG00000017839	N->N	synonymous
chr1	3581587	C	T	ENSBTAT00000064124, ENSBTAG00000017839	N->N	synonymous
chr1	3581593	C	T	ENSBTAT00000023716, ENSBTAG00000017839	G->G	synonymous
chr1	3581593	C	T	ENSBTAT00000064124, ENSBTAG00000017839	G->G	synonymous
chr1	3581725	C	T	ENSBTAT00000023716, ENSBTAG00000017839	S->S	synonymous
chr1	3581725	C	T	ENSBTAT00000064124, ENSBTAG00000017839	S->S	synonymous
chr1	3581834	G	A	ENSBTAT00000023716, ENSBTAG00000017839	A->T	missense
chr1	3581834	G	A	ENSBTAT00000064124, ENSBTAG00000017839	A->T	missense
chr1	3581902	C	T	ENSBTAT00000023716, ENSBTAG00000017839	A->A	synonymous
chr1	3581902	C	T	ENSBTAT00000064124, ENSBTAG00000017839	A->A	synonymous
chr1	3588969	T	C	ENSBTAT00000023716, ENSBTAG00000017839	P->P	synonymous
chr1	3588969	T	C	ENSBTAT00000064124, ENSBTAG00000017839	P->P	synonymous
chr1	3589029	A	G	ENSBTAT00000023716, ENSBTAG00000017839	K->K	synonymous
chr1	3589029	A	G	ENSBTAT00000064124, ENSBTAG00000017839	K->K	synonymous
chr1	3603696	C	T	ENSBTAT00000023716, ENSBTAG00000017839	C->C	synonymous
chr1	3603696	C	T	ENSBTAT00000064124, ENSBTAG00000017839	C->C	synonymous
chr1	3603834	G	A	ENSBTAT00000023716, ENSBTAG00000017839	T->T	synonymous
chr1	3603834	G	A	ENSBTAT00000064124, ENSBTAG00000017839	T->T	synonymous
chr1	3615054	A	C	ENSBTAT00000023716, ENSBTAG00000017839	S->S	synonymous
chr1	3620694	C	T	ENSBTAT00000023716, ENSBTAG00000017839	V->V	synonymous
chr1	3644515	A	G	ENSBTAT00000023716, ENSBTAG00000017839	E->G	missense
chr1	3650208	C	T	ENSBTAT00000023716, ENSBTAG00000017839	A->V	missense
chr1	3688121	G	A	ENSBTAT00000023716, ENSBTAG00000017839	L->L	synonymous
chr1	3688133	C	T	ENSBTAT00000023716, ENSBTAG00000017839	D->D	synonymous
chr1	3692935	G	A	ENSBTAT00000023716, ENSBTAG00000017839	A->T	missense
chr1	3698192	A	C	ENSBTAT00000023716, ENSBTAG00000017839	N->T	missense
chr1	3715512	T	C	ENSBTAT00000023716, ENSBTAG00000017839	I->I	synonymous
chr1	3721485	G	A	ENSBTAT00000023716, ENSBTAG00000017839	G->E	missense
chr1	3721590	A	G	ENSBTAT00000023716, ENSBTAG00000017839	D->G	missense
chr1	3721759	G	C	ENSBTAT00000023716, ENSBTAG00000017839	Q->H	missense
chr1	3721823	A	G	ENSBTAT00000023716, ENSBTAG00000017839	T->A	missense
chr1	3721873	C	T	ENSBTAT00000023716, ENSBTAG00000017839	V->V	synonymous
chr1	3972296	C	T	ENSBTAT00000049339, ENSBTAG00000034869	S->S	synonymous
chr1	3972296	C	T	NM_001080740, KRTAP11-1	S->S	synonymous
chr1	3972363	T	C	ENSBTAT00000049339, ENSBTAG00000034869	C->R	missense
chr1	3972363	T	C	NM_001080740, KRTAP11-1	C->R	missense
chr1	3972438	C	T	ENSBTAT00000049339, ENSBTAG00000034869	R->W	missense
chr1	3972438	C	T	NM_001080740, KRTAP11-1	R->W	missense
chr1	4036048	C	G	ENSBTAT00000066250, ENSBTAG00000046804	R->G	missense
chr1	4036062	C	T	ENSBTAT00000066250, ENSBTAG00000046804	C->C	synonymous
chr1	4036111	A	G	ENSBTAT00000066250, ENSBTAG00000046804	T->A	missense
chr1	4059320	G	A	ENSBTAT00000021000, ENSBTAG00000015812	G->G	synonymous
chr1	4059332	C	T	ENSBTAT00000021000, ENSBTAG00000015812	Y->Y	synonymous
chr1	4775275	T	A	ENSBTAT00000053288, ENSBTAG00000039602	F->I	missense
chr1	4775275	T	A	NM_001080350, KRTAP13-1	F->I	missense
chr1	4775608	C	G	ENSBTAT00000053288, ENSBTAG00000039602	R->G	missense
chr1	4775608	C	G	NM_001080350, KRTAP13-1	R->G	missense
chr1	4847014	C	T	ENSBTAT00000052636, ENSBTAG00000037933	R->C	missense
chr1	4847063	G	T	ENSBTAT00000052636, ENSBTAG00000037933	C->F	missense
chr1	4893501	C	A	ENSBTAT00000006318, ENSBTAG00000039597	T->T	synonymous
chr1	4893520	G	A	ENSBTAT00000006318, ENSBTAG00000039597	E->K	missense
chr1	4893554	G	A	ENSBTAT00000006318, ENSBTAG00000039597	C->Y	missense
chr1	4893695	A	G	ENSBTAT00000006318, ENSBTAG00000039597	Q->R	missense
chr1	4893748	C	T	ENSBTAT00000006318, ENSBTAG00000039597	P->S	missense
chr1	4893790	C	A	ENSBTAT00000006318, ENSBTAG00000039597	L->M	missense
chr1	4893797	G	A	ENSBTAT00000006318, ENSBTAG00000039597	C->Y	missense
chr1	4955651	T	C	ENSBTAT00000063306, ENSBTAG00000046384	S->S	synonymous
chr1	4955747	G	A	ENSBTAT00000063306, ENSBTAG00000046384	P->P	synonymous
chr1	4955749	G	A	ENSBTAT00000063306, ENSBTAG00000046384	S->N	missense
chr1	4955871	A	G	ENSBTAT00000063306, ENSBTAG00000046384	I->V	missense
chr1	4955966	G	T	ENSBTAT00000063306, ENSBTAG00000046384	Q->H	missense
chr1	4955972	C	T	ENSBTAT00000063306, ENSBTAG00000046384	L->L	synonymous
chr1	4956018	A	T	ENSBTAT00000063306, ENSBTAG00000046384	S->C	missense
chr1	4956084	T	A	ENSBTAT00000063306, ENSBTAG00000046384	F->I	missense
chr1	4956294	T	C	ENSBTAT00000063306, ENSBTAG00000046384	Y->H	missense
chr1	5036027	C	T	ENSBTAT00000044994, ENSBTAG00000039820	A->V	missense
chr1	5036027	C	T	NM_001098096, CLDN8	A->V	missense
chr1	5036233	T	C	ENSBTAT00000044994, ENSBTAG00000039820	L->L	synonymous
chr1	5036233	T	C	NM_001098096, CLDN8	L->L	synonymous
chr1	5036248	G	T	ENSBTAT00000044994, ENSBTAG00000039820	A->S	missense
chr1	5036248	G	T	NM_001098096, CLDN8	A->S	missense
chr1	5036560	C	T	ENSBTAT00000044994, ENSBTAG00000039820	H->Y	missense
chr1	5036560	C	T	NM_001098096, CLDN8	H->Y	missense
chr1	5095915	C	A	ENSBTAT00000057398, ENSBTAG00000039255	L->L	synonymous
chr1	5749907	C	T	ENSBTAT00000026817, ENSBTAG00000034854	S->S	synonymous
chr1	5749907	C	T	ENSBTAT00000026819, ENSBTAG00000034854	S->S	synonymous
chr1	5749907	C	T	NM_001102514, GRIK1	S->S	synonymous
chr1	5764307	G	A	ENSBTAT00000026817, ENSBTAG00000034854	S->S	synonymous
chr1	5764307	G	A	ENSBTAT00000026819, ENSBTAG00000034854	S->S	synonymous
chr1	5764307	G	A	NM_001102514, GRIK1	S->S	synonymous
chr1	5764319	C	A	ENSBTAT00000026817, ENSBTAG00000034854	A->A	synonymous
chr1	5764319	C	A	ENSBTAT00000026819, ENSBTAG00000034854	A->A	synonymous
chr1	5764319	C	A	NM_001102514, GRIK1	A->A	synonymous
chr1	5804471	C	T	ENSBTAT00000026817, ENSBTAG00000034854	I->I	synonymous
chr1	5804471	C	T	ENSBTAT00000026819, ENSBTAG00000034854	I->I	synonymous
chr1	5804471	C	T	NM_001102514, GRIK1	I->I	synonymous
chr1	5804482	G	A	ENSBTAT00000026817, ENSBTAG00000034854	R->Q	missense
chr1	5804482	G	A	ENSBTAT00000026819, ENSBTAG00000034854	R->Q	missense
chr1	5804482	G	A	NM_001102514, GRIK1	R->Q	missense
chr1	5861522	C	G	ENSBTAT00000026817, ENSBTAG00000034854	L->L	synonymous
chr1	5861522	C	G	ENSBTAT00000026819, ENSBTAG00000034854	L->L	synonymous
chr1	5861522	C	G	NM_001102514, GRIK1	L->L	synonymous
chr1	5872562	G	A	ENSBTAT00000026817, ENSBTAG00000034854	L->L	synonymous
chr1	5872562	G	A	ENSBTAT00000026819, ENSBTAG00000034854	L->L	synonymous
chr1	5872562	G	A	NM_001102514, GRIK1	L->L	synonymous
chr1	5891460	G	A	ENSBTAT00000064697, ENSBTAG00000045873	A->V	missense
chr1	5900914	G	A	ENSBTAT00000026819, ENSBTAG00000034854	Q->Q	synonymous
chr1	6157747	G	A	ENSBTAT00000005416, ENSBTAG00000004139	R->W	missense
chr1	6169131	G	A	ENSBTAT00000005416, ENSBTAG00000004139	S->S	synonymous
chr1	6169303	A	G	ENSBTAT00000005416, ENSBTAG00000004139	V->A	missense
chr1	6169440	G	A	ENSBTAT00000005416, ENSBTAG00000004139	S->S	synonymous
chr1	6170050	A	T	ENSBTAT00000005416, ENSBTAG00000004139	V->E	missense
chr1	6174048	C	T	ENSBTAT00000005416, ENSBTAG00000004139	V->V	synonymous
chr1	6367404	C	T	ENSBTAT00000049195, ENSBTAG00000007444	T->T	synonymous
chr1	6480486	G	C	ENSBTAT00000018917, ENSBTAG00000014233	E->D	missense
chr1	6480486	G	C	NM_001033609, CCT8	E->D	missense
chr1	6481124	G	A	ENSBTAT00000018917, ENSBTAG00000014233	G->S	missense
chr1	6481124	G	A	NM_001033609, CCT8	G->S	missense
chr1	6481146	A	G	ENSBTAT00000018917, ENSBTAG00000014233	K->R	missense
chr1	6481146	A	G	NM_001033609, CCT8	K->R	missense
chr1	6484399	C	T	ENSBTAT00000018917, ENSBTAG00000014233	L->L	synonymous
chr1	6484399	C	T	NM_001033609, CCT8	L->L	synonymous
chr1	6485133	G	C	ENSBTAT00000018917, ENSBTAG00000014233	T->T	synonymous
chr1	6485133	G	C	NM_001033609, CCT8	T->T	synonymous
chr1	6491238	C	T	ENSBTAT00000026801, ENSBTAG00000020122	S->N	missense
chr1	6491238	C	T	NM_001076867, USP16	S->N	missense
chr1	6501192	A	G	ENSBTAT00000026801, ENSBTAG00000020122	D->D	synonymous
chr1	6501192	A	G	NM_001076867, USP16	D->D	synonymous
chr1	6529977	G	A	ENSBTAT00000065332, ENSBTAG00000020121	E->K	missense
chr1	6530487	C	G	ENSBTAT00000026800, ENSBTAG00000020121	H->Q	missense
chr1	6530487	C	G	ENSBTAT00000065332, ENSBTAG00000020121	H->Q	missense
chr1	6530646	C	T	ENSBTAT00000026800, ENSBTAG00000020121	G->G	synonymous
chr1	6530646	C	T	ENSBTAT00000065332, ENSBTAG00000020121	G->G	synonymous
chr1	6532829	T	C	ENSBTAT00000026800, ENSBTAG00000020121	F->L	missense
chr1	6532829	T	C	ENSBTAT00000065332, ENSBTAG00000020121	F->L	missense
chr1	6545901	T	G	ENSBTAT00000032432, ENSBTAG00000000201	G->G	synonymous
chr1	6546006	G	A	ENSBTAT00000032432, ENSBTAG00000000201	P->P	synonymous
chr1	6554502	G	A	ENSBTAT00000032432, ENSBTAG00000000201	P->P	synonymous
chr1	6554502	G	A	NM_001192509, LTN1	P->P	synonymous
chr1	6566224	T	C	ENSBTAT00000032432, ENSBTAG00000000201	A->A	synonymous
chr1	6566224	T	C	NM_001192509, LTN1	A->A	synonymous
chr1	6566440	C	T	ENSBTAT00000032432, ENSBTAG00000000201	S->S	synonymous
chr1	6566440	C	T	NM_001192509, LTN1	S->S	synonymous
chr1	6570130	A	G	ENSBTAT00000032432, ENSBTAG00000000201	A->A	synonymous
chr1	6570130	A	G	NM_001192509, LTN1	A->A	synonymous
chr1	6570283	T	C	ENSBTAT00000032432, ENSBTAG00000000201	L->L	synonymous
chr1	6570283	T	C	NM_001192509, LTN1	L->L	synonymous
chr1	6572800	T	G	ENSBTAT00000032432, ENSBTAG00000000201	V->V	synonymous
chr1	6572800	T	G	NM_001192509, LTN1	V->V	synonymous
chr1	6573508	A	G	ENSBTAT00000032432, ENSBTAG00000000201	A->A	synonymous
chr1	6573508	A	G	NM_001192509, LTN1	A->A	synonymous
chr1	6575288	C	T	ENSBTAT00000032432, ENSBTAG00000000201	T->M	missense
chr1	6575288	C	T	NM_001192509, LTN1	T->M	missense
chr1	6576313	C	T	ENSBTAT00000032432, ENSBTAG00000000201	N->N	synonymous
chr1	6576313	C	T	NM_001192509, LTN1	N->N	synonymous
chr1	6580070	T	C	ENSBTAT00000032432, ENSBTAG00000000201	V->A	missense
chr1	6580070	T	C	NM_001192509, LTN1	V->A	missense
chr1	6586438	C	T	ENSBTAT00000032432, ENSBTAG00000000201	T->I	missense
chr1	6586438	C	T	NM_001192509, LTN1	T->I	missense
chr1	6587228	C	T	ENSBTAT00000032432, ENSBTAG00000000201	L->F	missense
chr1	6587228	C	T	NM_001192509, LTN1	L->F	missense
chr1	6593308	G	A	ENSBTAT00000032432, ENSBTAG00000000201	V->I	missense
chr1	6593308	G	A	NM_001192509, LTN1	V->I	missense
chr1	6599122	A	G	ENSBTAT00000032432, ENSBTAG00000000201	N->S	missense
chr1	6599122	A	G	NM_001192509, LTN1	N->S	missense
chr1	6599207	C	G	ENSBTAT00000032432, ENSBTAG00000000201	L->L	synonymous
chr1	6599207	C	G	NM_001192509, LTN1	L->L	synonymous
chr1	6609333	T	C	ENSBTAT00000056346, ENSBTAG00000038433	S->S	synonymous
chr1	6609337	G	A	ENSBTAT00000056346, ENSBTAG00000038433	V->M	missense
chr1	6609521	G	A	ENSBTAT00000056346, ENSBTAG00000038433	S->N	missense
chr1	6630979	T	C	ENSBTAT00000001851, ENSBTAG00000001412	K->R	missense
chr1	6630979	T	C	NM_001083513, N6AMT1	K->R	missense
chr1	6632298	G	A	ENSBTAT00000001851, ENSBTAG00000001412	V->V	synonymous
chr1	6632298	G	A	NM_001083513, N6AMT1	V->V	synonymous
chr1	6635988	C	T	ENSBTAT00000001851, ENSBTAG00000001412	E->E	synonymous
chr1	6635988	C	T	NM_001083513, N6AMT1	E->E	synonymous
chr1	6643841	C	T	ENSBTAT00000001851, ENSBTAG00000001412	S->N	missense
chr1	6643841	C	T	NM_001083513, N6AMT1	S->N	missense
chr1	6643846	G	A	ENSBTAT00000001851, ENSBTAG00000001412	D->D	synonymous
chr1	6643846	G	A	NM_001083513, N6AMT1	D->D	synonymous
chr1	6643850	C	T	ENSBTAT00000001851, ENSBTAG00000001412	G->D	missense
chr1	6643850	C	T	NM_001083513, N6AMT1	G->D	missense
chr1	8328145	G	A	ENSBTAT00000056505, ENSBTAG00000040155	R->Q	missense
chr1	8328194	T	C	ENSBTAT00000056505, ENSBTAG00000040155	Y->Y	synonymous
chr1	8328203	T	C	ENSBTAT00000056505, ENSBTAG00000040155	T->T	synonymous
chr1	8811801	G	C	ENSBTAT00000000849, ENSBTAG00000000648	G->R	missense
chr1	8811801	G	C	NM_001166515, ADAMTS5	G->R	missense
chr1	8811929	T	C	ENSBTAT00000000849, ENSBTAG00000000648	R->R	synonymous
chr1	8811929	T	C	NM_001166515, ADAMTS5	R->R	synonymous
chr1	8812171	G	T	ENSBTAT00000000849, ENSBTAG00000000648	R->L	missense
chr1	8812171	G	T	NM_001166515, ADAMTS5	R->L	missense
chr1	8812191	T	C	ENSBTAT00000000849, ENSBTAG00000000648	Y->H	missense
chr1	8812191	T	C	NM_001166515, ADAMTS5	Y->H	missense
chr1	8812229	A	C	ENSBTAT00000000849, ENSBTAG00000000648	A->A	synonymous
chr1	8812229	A	C	NM_001166515, ADAMTS5	A->A	synonymous
chr1	8812280	G	A	ENSBTAT00000000849, ENSBTAG00000000648	A->A	synonymous
chr1	8812280	G	A	NM_001166515, ADAMTS5	A->A	synonymous
chr1	8812336	C	A	ENSBTAT00000000849, ENSBTAG00000000648	A->E	missense
chr1	8812336	C	A	NM_001166515, ADAMTS5	A->E	missense
chr1	8812340	A	C	ENSBTAT00000000849, ENSBTAG00000000648	R->R	synonymous
chr1	8812340	A	C	NM_001166515, ADAMTS5	R->R	synonymous
chr1	8812438	C	G	ENSBTAT00000000849, ENSBTAG00000000648	A->G	missense
chr1	8812438	C	G	NM_001166515, ADAMTS5	A->G	missense
chr1	8812886	G	T	ENSBTAT00000000849, ENSBTAG00000000648	A->A	synonymous
chr1	8812886	G	T	NM_001166515, ADAMTS5	A->A	synonymous
chr1	8825445	C	T	ENSBTAT00000000849, ENSBTAG00000000648	C->C	synonymous
chr1	8825445	C	T	NM_001166515, ADAMTS5	C->C	synonymous
chr1	8847946	C	T	ENSBTAT00000000849, ENSBTAG00000000648	P->P	synonymous
chr1	8847946	C	T	NM_001166515, ADAMTS5	P->P	synonymous
chr1	8850109	A	G	ENSBTAT00000000849, ENSBTAG00000000648	P->P	synonymous
chr1	8850109	A	G	NM_001166515, ADAMTS5	P->P	synonymous
chr1	8850112	G	A	ENSBTAT00000000849, ENSBTAG00000000648	A->A	synonymous
chr1	8850112	G	A	NM_001166515, ADAMTS5	A->A	synonymous
chr1	8850133	T	C	ENSBTAT00000000849, ENSBTAG00000000648	Y->Y	synonymous
chr1	8850133	T	C	NM_001166515, ADAMTS5	Y->Y	synonymous
chr1	8850163	C	G	ENSBTAT00000000849, ENSBTAG00000000648	S->S	synonymous
chr1	8850163	C	G	NM_001166515, ADAMTS5	S->S	synonymous
chr1	8850191	G	A	ENSBTAT00000000849, ENSBTAG00000000648	G->S	missense
chr1	8850191	G	A	NM_001166515, ADAMTS5	G->S	missense
chr1	8853168	G	A	ENSBTAT00000000849, ENSBTAG00000000648	G->S	missense
chr1	8853168	G	A	NM_001166515, ADAMTS5	G->S	missense
chr1	8853245	C	T	ENSBTAT00000000849, ENSBTAG00000000648	V->V	synonymous
chr1	8853245	C	T	NM_001166515, ADAMTS5	V->V	synonymous
chr1	8861074	G	A	ENSBTAT00000000849, ENSBTAG00000000648	A->A	synonymous
chr1	8861074	G	A	NM_001166515, ADAMTS5	A->A	synonymous
chr1	8861487	C	G	ENSBTAT00000000849, ENSBTAG00000000648	T->R	missense
chr1	8861487	C	G	NM_001166515, ADAMTS5	T->R	missense
chr1	8861529	G	A	ENSBTAT00000000849, ENSBTAG00000000648	R->Q	missense
chr1	8861529	G	A	NM_001166515, ADAMTS5	R->Q	missense
chr1	8956244	G	C	ENSBTAT00000000944, ENSBTAG00000000706	G->G	synonymous
chr1	8956244	G	C	NM_001101080, ADAMTS1	G->G	synonymous
chr1	8956297	C	G	ENSBTAT00000000944, ENSBTAG00000000706	P->R	missense
chr1	8956297	C	G	NM_001101080, ADAMTS1	P->R	missense
chr1	8958113	C	A	ENSBTAT00000000944, ENSBTAG00000000706	P->H	missense
chr1	8958113	C	A	NM_001101080, ADAMTS1	P->H	missense
chr1	8958261	C	G	ENSBTAT00000000944, ENSBTAG00000000706	R->R	synonymous
chr1	8958261	C	G	NM_001101080, ADAMTS1	R->R	synonymous
chr1	8959417	A	G	ENSBTAT00000000944, ENSBTAG00000000706	A->A	synonymous
chr1	8959417	A	G	NM_001101080, ADAMTS1	A->A	synonymous
chr1	8960816	C	A	ENSBTAT00000000944, ENSBTAG00000000706	P->T	missense
chr1	8960816	C	A	NM_001101080, ADAMTS1	P->T	missense
chr1	8961932	T	C	ENSBTAT00000000944, ENSBTAG00000000706	S->S	synonymous
chr1	8961932	T	C	NM_001101080, ADAMTS1	S->S	synonymous
chr1	8962272	C	G	ENSBTAT00000000944, ENSBTAG00000000706	T->S	missense
chr1	8962272	C	G	NM_001101080, ADAMTS1	T->S	missense
chr1	8962690	C	T	ENSBTAT00000000944, ENSBTAG00000000706	N->N	synonymous
chr1	8962690	C	T	NM_001101080, ADAMTS1	N->N	synonymous
chr1	9242733	G	A	ENSBTAT00000049039, ENSBTAG00000005742	P->P	synonymous
chr1	9242763	G	T	ENSBTAT00000049039, ENSBTAG00000005742	P->P	synonymous
chr1	9675980	C	T	ENSBTAT00000049004, ENSBTAG00000017753	D->D	synonymous
chr1	9675980	C	T	NM_001076796, APP	D->D	synonymous
chr1	9676001	G	A	ENSBTAT00000049004, ENSBTAG00000017753	A->A	synonymous
chr1	9676001	G	A	NM_001076796, APP	A->A	synonymous
chr1	9676058	C	T	ENSBTAT00000049004, ENSBTAG00000017753	N->N	synonymous
chr1	9676058	C	T	NM_001076796, APP	N->N	synonymous
chr1	9735824	T	C	ENSBTAT00000049004, ENSBTAG00000017753	S->S	synonymous
chr1	9735824	T	C	NM_001076796, APP	S->S	synonymous
chr1	9735848	G	A	ENSBTAT00000049004, ENSBTAG00000017753	K->K	synonymous
chr1	9735848	G	A	NM_001076796, APP	K->K	synonymous
chr1	9735893	C	T	ENSBTAT00000049004, ENSBTAG00000017753	H->H	synonymous
chr1	9735893	C	T	NM_001076796, APP	H->H	synonymous
chr1	9777660	A	T	ENSBTAT00000049004, ENSBTAG00000017753	Y->F	missense
chr1	9777660	A	T	NM_001076796, APP	Y->F	missense
chr1	9811844	T	C	ENSBTAT00000049004, ENSBTAG00000017753	R->R	synonymous
chr1	9811844	T	C	NM_001076796, APP	R->R	synonymous
chr1	9846174	C	T	ENSBTAT00000049004, ENSBTAG00000017753	L->L	synonymous
chr1	9846174	C	T	NM_001076796, APP	L->L	synonymous
chr1	9889246	G	A	ENSBTAT00000049004, ENSBTAG00000017753	V->M	missense
chr1	9889246	G	A	NM_001076796, APP	V->M	missense
chr1	9889326	C	T	ENSBTAT00000049004, ENSBTAG00000017753	P->P	synonymous
chr1	9889326	C	T	NM_001076796, APP	P->P	synonymous
chr1	10042961	C	G	ENSBTAT00000025345, ENSBTAG00000019043	P->P	synonymous
chr1	10042961	C	G	NM_001075437, GABPA	P->P	synonymous
chr1	10061282	G	A	ENSBTAT00000025345, ENSBTAG00000019043	T->M	missense
chr1	10061282	G	A	NM_001075437, GABPA	T->M	missense
chr1	10076192	C	T	ENSBTAT00000032427, ENSBTAG00000000605	T->M	missense
chr1	10076192	C	T	ENSBTAT00000066011, ENSBTAG00000000605	T->M	missense
chr1	10076192	C	T	NM_174717, ATP5J	T->M	missense
chr1	10099129	T	A	ENSBTAT00000000795, ENSBTAG00000000603	Q->H	missense
chr1	10099129	T	A	NM_001083736, JAM2	Q->H	missense
chr1	10099168	G	A	ENSBTAT00000000795, ENSBTAG00000000603	N->N	synonymous
chr1	10099168	G	A	NM_001083736, JAM2	N->N	synonymous
chr1	10201994	C	G	ENSBTAT00000026038, ENSBTAG00000019542	V->V	synonymous
chr1	10201994	C	G	NM_001080730, MRPL39	V->V	synonymous
chr1	10202040	T	A	ENSBTAT00000026038, ENSBTAG00000019542	W->R	missense
chr1	10202040	T	A	NM_001080730, MRPL39	W->R	missense
chr1	10215468	C	A	ENSBTAT00000026038, ENSBTAG00000019542	R->R	synonymous
chr1	10215468	C	A	NM_001080730, MRPL39	R->R	synonymous
chr1	14791465	C	T	ENSBTAT00000034421, ENSBTAG00000003301	D->N	missense
chr1	14801336	C	T	ENSBTAT00000034421, ENSBTAG00000003301	A->A	synonymous
chr1	14893777	A	G	ENSBTAT00000034421, ENSBTAG00000003301	Y->Y	synonymous
chr1	15011948	C	T	ENSBTAT00000034421, ENSBTAG00000003301	S->N	missense
chr1	15020075	C	T	ENSBTAT00000034421, ENSBTAG00000003301	W->*	stop-gain
chr1	15026522	A	G	ENSBTAT00000034421, ENSBTAG00000003301	Y->H	missense
chr1	18058842	C	T	ENSBTAT00000000788, ENSBTAG00000000597	P->S	missense
chr1	18058842	C	T	ENSBTAT00000064206, ENSBTAG00000000597	P->S	missense
chr1	18058842	C	T	NM_174439, TMPRSS15	P->S	missense
chr1	18073037	C	A	ENSBTAT00000000788, ENSBTAG00000000597	S->Y	missense
chr1	18073037	C	A	NM_174439, TMPRSS15	S->Y	missense
chr1	18086944	A	G	ENSBTAT00000000788, ENSBTAG00000000597	D->G	missense
chr1	18086944	A	G	ENSBTAT00000064206, ENSBTAG00000000597	D->G	missense
chr1	18086944	A	G	NM_174439, TMPRSS15	D->G	missense
chr1	18094978	G	A	ENSBTAT00000000788, ENSBTAG00000000597	A->T	missense
chr1	18094978	G	A	ENSBTAT00000064206, ENSBTAG00000000597	A->T	missense
chr1	18094978	G	A	NM_174439, TMPRSS15	A->T	missense
chr1	18107114	G	A	ENSBTAT00000000788, ENSBTAG00000000597	D->N	missense
chr1	18107114	G	A	ENSBTAT00000064206, ENSBTAG00000000597	D->N	missense
chr1	18107114	G	A	NM_174439, TMPRSS15	D->N	missense
chr1	18116424	G	A	ENSBTAT00000000788, ENSBTAG00000000597	Q->Q	synonymous
chr1	18116424	G	A	ENSBTAT00000064206, ENSBTAG00000000597	Q->Q	synonymous
chr1	18116424	G	A	NM_174439, TMPRSS15	Q->Q	synonymous
chr1	18153085	C	A	ENSBTAT00000000788, ENSBTAG00000000597	R->S	missense
chr1	18153085	C	A	ENSBTAT00000064206, ENSBTAG00000000597	R->S	missense
chr1	18153085	C	A	NM_174439, TMPRSS15	R->S	missense
chr1	18171678	C	T	ENSBTAT00000000788, ENSBTAG00000000597	L->L	synonymous
chr1	18171678	C	T	ENSBTAT00000064206, ENSBTAG00000000597	L->L	synonymous
chr1	18171678	C	T	NM_174439, TMPRSS15	L->L	synonymous
chr1	18195776	C	T	ENSBTAT00000000788, ENSBTAG00000000597	P->S	missense
chr1	18195776	C	T	ENSBTAT00000064206, ENSBTAG00000000597	P->S	missense
chr1	18195776	C	T	NM_174439, TMPRSS15	P->S	missense
chr1	18201899	T	C	ENSBTAT00000000788, ENSBTAG00000000597	Y->Y	synonymous
chr1	18201899	T	C	ENSBTAT00000064206, ENSBTAG00000000597	Y->Y	synonymous
chr1	18201899	T	C	NM_174439, TMPRSS15	Y->Y	synonymous
chr1	18206503	G	A	ENSBTAT00000000788, ENSBTAG00000000597	L->L	synonymous
chr1	18206503	G	A	ENSBTAT00000064206, ENSBTAG00000000597	L->L	synonymous
chr1	18206503	G	A	NM_174439, TMPRSS15	L->L	synonymous
chr1	18206515	G	A	ENSBTAT00000000788, ENSBTAG00000000597	T->T	synonymous
chr1	18206515	G	A	ENSBTAT00000064206, ENSBTAG00000000597	T->T	synonymous
chr1	18206515	G	A	NM_174439, TMPRSS15	T->T	synonymous
chr1	18206569	G	C	ENSBTAT00000000788, ENSBTAG00000000597	V->V	synonymous
chr1	18206569	G	C	ENSBTAT00000064206, ENSBTAG00000000597	V->V	synonymous
chr1	18206569	G	C	NM_174439, TMPRSS15	V->V	synonymous
chr1	18720716	C	A	ENSBTAT00000001832, ENSBTAG00000001395	I->I	synonymous
chr1	18720716	C	A	NM_001037617, C1H21orf91	I->I	synonymous
chr1	18745160	G	T	ENSBTAT00000001832, ENSBTAG00000001395	S->S	synonymous
chr1	18745160	G	T	NM_001037617, C1H21orf91	S->S	synonymous
chr1	18745208	C	T	ENSBTAT00000001832, ENSBTAG00000001395	G->G	synonymous
chr1	18745208	C	T	NM_001037617, C1H21orf91	G->G	synonymous
chr1	18745228	G	A	ENSBTAT00000001832, ENSBTAG00000001395	R->Q	missense
chr1	18745228	G	A	NM_001037617, C1H21orf91	R->Q	missense
chr1	18748189	C	T	ENSBTAT00000001832, ENSBTAG00000001395	H->H	synonymous
chr1	18748189	C	T	NM_001037617, C1H21orf91	H->H	synonymous
chr1	18902920	G	C	ENSBTAT00000064919, ENSBTAG00000047943	S->C	missense
chr1	18903163	T	C	ENSBTAT00000064919, ENSBTAG00000047943	M->V	missense
chr1	18903459	T	C	ENSBTAT00000064919, ENSBTAG00000047943	Y->C	missense
chr1	18903543	T	A	ENSBTAT00000064919, ENSBTAG00000047943	K->I	missense
chr1	18903611	C	G	ENSBTAT00000064919, ENSBTAG00000047943	W->C	missense
chr1	18903611	C	T	ENSBTAT00000064919, ENSBTAG00000047943	W->*	stop-gain
chr1	18904540	T	C	ENSBTAT00000064919, ENSBTAG00000047943	H->R	missense
chr1	18913111	A	C	ENSBTAT00000024895, ENSBTAG00000018704	R->R	synonymous
chr1	18913111	A	C	NM_001034722, BTG3	R->R	synonymous
chr1	18922899	G	A	ENSBTAT00000024895, ENSBTAG00000018704	P->P	synonymous
chr1	18922899	G	A	NM_001034722, BTG3	P->P	synonymous
chr1	18951609	C	T	ENSBTAT00000006400, ENSBTAG00000004869	E->E	synonymous
chr1	18951609	C	T	NM_174298, CXADR	E->E	synonymous
chr1	19865530	A	G	ENSBTAT00000045897, ENSBTAG00000040418	C->C	synonymous
chr1	19865545	C	T	ENSBTAT00000045897, ENSBTAG00000040418	A->A	synonymous
chr1	19865551	A	C	ENSBTAT00000045897, ENSBTAG00000040418	L->L	synonymous
chr1	19865623	T	C	ENSBTAT00000045897, ENSBTAG00000040418	T->T	synonymous
chr1	19865632	C	T	ENSBTAT00000045897, ENSBTAG00000040418	V->V	synonymous
chr1	19865635	G	A	ENSBTAT00000045897, ENSBTAG00000040418	N->N	synonymous
chr1	19865641	C	T	ENSBTAT00000045897, ENSBTAG00000040418	G->G	synonymous
chr1	20718125	G	T	ENSBTAT00000025716, ENSBTAG00000019314	Y->*	stop-gain
chr1	20721975	C	T	ENSBTAT00000025716, ENSBTAG00000019314	A->T	missense
chr1	20723726	T	C	ENSBTAT00000025716, ENSBTAG00000019314	L->L	synonymous
chr1	20736381	G	A	ENSBTAT00000025716, ENSBTAG00000019314	N->N	synonymous
chr1	20742134	T	C	ENSBTAT00000025716, ENSBTAG00000019314	L->L	synonymous
chr1	20762485	G	A	ENSBTAT00000025716, ENSBTAG00000019314	P->L	missense
chr1	20792484	G	A	ENSBTAT00000025716, ENSBTAG00000019314	A->V	missense
chr1	20798814	C	T	ENSBTAT00000025716, ENSBTAG00000019314	-	splice-site
chr1	21694432	G	A	ENSBTAT00000065805, ENSBTAG00000047293	S->N	missense
chr1	21694491	G	A	ENSBTAT00000065805, ENSBTAG00000047293	V->I	missense
chr1	21695128	T	C	ENSBTAT00000065805, ENSBTAG00000047293	F->S	missense
chr1	21695432	G	A	ENSBTAT00000065805, ENSBTAG00000047293	T->T	synonymous
chr1	21695693	G	A	ENSBTAT00000065805, ENSBTAG00000047293	T->T	synonymous
chr1	21696107	C	A	ENSBTAT00000065805, ENSBTAG00000047293	D->E	missense
chr1	21696155	A	G	ENSBTAT00000065805, ENSBTAG00000047293	G->G	synonymous
chr1	21696251	T	C	ENSBTAT00000065805, ENSBTAG00000047293	D->D	synonymous
chr1	21697276	C	A	ENSBTAT00000065805, ENSBTAG00000047293	T->K	missense
chr1	22158802	C	A	ENSBTAT00000003394, ENSBTAG00000002623	R->R	synonymous
chr1	22158802	C	A	NM_001035404, SAMSN1	R->R	synonymous
chr1	22161610	C	T	ENSBTAT00000003394, ENSBTAG00000002623	L->L	synonymous
chr1	22161610	C	T	NM_001035404, SAMSN1	L->L	synonymous
chr1	22292746	C	T	ENSBTAT00000017155, ENSBTAG00000012908	P->L	missense
chr1	22292746	C	T	NM_001038505, HSPA13	P->L	missense
chr1	22298995	C	T	ENSBTAT00000017155, ENSBTAG00000012908	Y->Y	synonymous
chr1	22298995	C	T	NM_001038505, HSPA13	Y->Y	synonymous
chr1	22299582	A	G	ENSBTAT00000017155, ENSBTAG00000012908	N->S	missense
chr1	22299582	A	G	NM_001038505, HSPA13	N->S	missense
chr1	22456740	T	G	ENSBTAT00000048660, ENSBTAG00000034347	R->R	synonymous
chr1	22456740	T	G	NM_001040567, RBM11	R->R	synonymous
chr1	22456787	C	T	ENSBTAT00000048660, ENSBTAG00000034347	S->N	missense
chr1	22456787	C	T	NM_001040567, RBM11	S->N	missense
chr1	22456810	G	A	ENSBTAT00000048660, ENSBTAG00000034347	D->D	synonymous
chr1	22456810	G	A	NM_001040567, RBM11	D->D	synonymous
chr1	22456888	A	G	ENSBTAT00000048660, ENSBTAG00000034347	Y->Y	synonymous
chr1	22456888	A	G	NM_001040567, RBM11	Y->Y	synonymous
chr1	22457002	G	A	ENSBTAT00000048660, ENSBTAG00000034347	Y->Y	synonymous
chr1	22457002	G	A	NM_001040567, RBM11	Y->Y	synonymous
chr1	22457029	C	A	ENSBTAT00000048660, ENSBTAG00000034347	G->G	synonymous
chr1	22457029	C	A	NM_001040567, RBM11	G->G	synonymous
chr1	22497283	A	G	ENSBTAT00000053236, ENSBTAG00000038512	K->R	missense
chr1	22497283	A	G	NM_001105006, LIPI	K->R	missense
chr1	23995781	G	A	ENSBTAT00000064983, ENSBTAG00000046755	E->E	synonymous
chr1	23995883	A	G	ENSBTAT00000064983, ENSBTAG00000046755	P->P	synonymous
chr1	24398468	G	A	ENSBTAT00000048830, ENSBTAG00000010462	G->G	synonymous
chr1	24482687	C	T	ENSBTAT00000048830, ENSBTAG00000010462	N->N	synonymous
chr1	24500301	C	T	ENSBTAT00000048830, ENSBTAG00000010462	V->V	synonymous
chr1	24538146	G	A	ENSBTAT00000048830, ENSBTAG00000010462	P->P	synonymous
chr1	24538295	G	A	ENSBTAT00000048830, ENSBTAG00000010462	S->N	missense
chr1	24558181	T	C	ENSBTAT00000048830, ENSBTAG00000010462	V->V	synonymous
chr1	24563017	A	G	ENSBTAT00000048830, ENSBTAG00000010462	P->P	synonymous
chr1	25628330	T	C	ENSBTAT00000048615, ENSBTAG00000009851	N->S	missense
chr1	25628330	T	C	ENSBTAT00000061264, ENSBTAG00000009851	N->S	missense
chr1	25628330	T	C	NM_001192888, ROBO1	N->S	missense
chr1	25628352	G	C	ENSBTAT00000048615, ENSBTAG00000009851	Q->E	missense
chr1	25628352	G	C	ENSBTAT00000061264, ENSBTAG00000009851	Q->E	missense
chr1	25628352	G	C	NM_001192888, ROBO1	Q->E	missense
chr1	25641592	C	T	ENSBTAT00000048615, ENSBTAG00000009851	G->E	missense
chr1	25641592	C	T	ENSBTAT00000061264, ENSBTAG00000009851	G->E	missense
chr1	25641592	C	T	NM_001192888, ROBO1	G->E	missense
chr1	25641762	G	A	ENSBTAT00000048615, ENSBTAG00000009851	Y->Y	synonymous
chr1	25641762	G	A	ENSBTAT00000061264, ENSBTAG00000009851	Y->Y	synonymous
chr1	25641762	G	A	NM_001192888, ROBO1	Y->Y	synonymous
chr1	25663122	C	T	ENSBTAT00000048615, ENSBTAG00000009851	T->T	synonymous
chr1	25663122	C	T	ENSBTAT00000061264, ENSBTAG00000009851	T->T	synonymous
chr1	25663122	C	T	NM_001192888, ROBO1	T->T	synonymous
chr1	25663128	G	A	ENSBTAT00000048615, ENSBTAG00000009851	C->C	synonymous
chr1	25663128	G	A	ENSBTAT00000061264, ENSBTAG00000009851	C->C	synonymous
chr1	25663128	G	A	NM_001192888, ROBO1	C->C	synonymous
chr1	25663197	G	A	ENSBTAT00000048615, ENSBTAG00000009851	A->A	synonymous
chr1	25663197	G	A	ENSBTAT00000061264, ENSBTAG00000009851	A->A	synonymous
chr1	25663197	G	A	NM_001192888, ROBO1	A->A	synonymous
chr1	25675973	A	G	ENSBTAT00000048615, ENSBTAG00000009851	Y->Y	synonymous
chr1	25675973	A	G	ENSBTAT00000061264, ENSBTAG00000009851	Y->Y	synonymous
chr1	25675973	A	G	NM_001192888, ROBO1	Y->Y	synonymous
chr1	25680251	T	C	ENSBTAT00000048615, ENSBTAG00000009851	Q->Q	synonymous
chr1	25680251	T	C	ENSBTAT00000061264, ENSBTAG00000009851	Q->Q	synonymous
chr1	25680251	T	C	NM_001192888, ROBO1	Q->Q	synonymous
chr1	25683767	C	T	ENSBTAT00000048615, ENSBTAG00000009851	E->E	synonymous
chr1	25683767	C	T	ENSBTAT00000061264, ENSBTAG00000009851	E->E	synonymous
chr1	25683767	C	T	NM_001192888, ROBO1	E->E	synonymous
chr1	25683818	A	G	ENSBTAT00000048615, ENSBTAG00000009851	L->L	synonymous
chr1	25683818	A	G	ENSBTAT00000061264, ENSBTAG00000009851	L->L	synonymous
chr1	25683818	A	G	NM_001192888, ROBO1	L->L	synonymous
chr1	25683878	G	T	ENSBTAT00000061264, ENSBTAG00000009851	P->P	synonymous
chr1	25683878	G	T	NM_001192888, ROBO1	P->P	synonymous
chr1	25684982	A	C	ENSBTAT00000048615, ENSBTAG00000009851	V->G	missense
chr1	25684982	A	C	ENSBTAT00000061264, ENSBTAG00000009851	V->G	missense
chr1	25684982	A	C	NM_001192888, ROBO1	V->G	missense
chr1	25686011	G	C	ENSBTAT00000048615, ENSBTAG00000009851	Q->E	missense
chr1	25686011	G	C	ENSBTAT00000061264, ENSBTAG00000009851	Q->E	missense
chr1	25686011	G	C	NM_001192888, ROBO1	Q->E	missense
chr1	25692336	C	T	ENSBTAT00000048615, ENSBTAG00000009851	T->T	synonymous
chr1	25692336	C	T	ENSBTAT00000061264, ENSBTAG00000009851	T->T	synonymous
chr1	25692336	C	T	NM_001192888, ROBO1	T->T	synonymous
chr1	25692405	G	A	ENSBTAT00000048615, ENSBTAG00000009851	T->T	synonymous
chr1	25692405	G	A	ENSBTAT00000061264, ENSBTAG00000009851	T->T	synonymous
chr1	25692405	G	A	NM_001192888, ROBO1	T->T	synonymous
chr1	25738191	A	T	ENSBTAT00000048615, ENSBTAG00000009851	A->A	synonymous
chr1	25738191	A	T	ENSBTAT00000061264, ENSBTAG00000009851	A->A	synonymous
chr1	25738191	A	T	NM_001192888, ROBO1	A->A	synonymous
chr1	25740765	C	T	ENSBTAT00000048615, ENSBTAG00000009851	R->K	missense
chr1	25740765	C	T	ENSBTAT00000061264, ENSBTAG00000009851	R->K	missense
chr1	25740765	C	T	NM_001192888, ROBO1	R->K	missense
chr1	25740816	G	A	ENSBTAT00000048615, ENSBTAG00000009851	A->V	missense
chr1	25740816	G	A	ENSBTAT00000061264, ENSBTAG00000009851	A->V	missense
chr1	25740816	G	A	NM_001192888, ROBO1	A->V	missense
chr1	26210255	G	A	ENSBTAT00000061264, ENSBTAG00000009851	S->S	synonymous
chr1	26210255	G	A	NM_001192888, ROBO1	S->S	synonymous
chr1	26210477	C	A	ENSBTAT00000061264, ENSBTAG00000009851	S->S	synonymous
chr1	28611886	C	T	ENSBTAT00000011007, ENSBTAG00000008359	A->A	synonymous
chr1	28611962	T	G	ENSBTAT00000011007, ENSBTAG00000008359	F->V	missense
chr1	28612077	T	G	ENSBTAT00000011007, ENSBTAG00000008359	L->W	missense
chr1	28612141	G	A	ENSBTAT00000011007, ENSBTAG00000008359	L->L	synonymous
chr1	28612150	A	G	ENSBTAT00000011007, ENSBTAG00000008359	G->G	synonymous
chr1	28612224	G	A	ENSBTAT00000011007, ENSBTAG00000008359	R->Q	missense
chr1	28763106	T	A	ENSBTAT00000050765, ENSBTAG00000036262	G->G	synonymous
chr1	28763106	T	A	NM_001122729, GBE1	G->G	synonymous
chr1	28809543	C	G	ENSBTAT00000050765, ENSBTAG00000036262	A->A	synonymous
chr1	28809543	C	G	NM_001122729, GBE1	A->A	synonymous
chr1	28833957	C	T	ENSBTAT00000050765, ENSBTAG00000036262	-	splice-site
chr1	28972443	C	T	NM_001122729, GBE1	E->E	synonymous
chr1	30301173	G	A	ENSBTAT00000065610, ENSBTAG00000046383	E->E	synonymous
chr1	30301302	C	G	ENSBTAT00000065610, ENSBTAG00000046383	S->S	synonymous
chr1	30301338	C	A	ENSBTAT00000065610, ENSBTAG00000046383	D->E	missense
chr1	30301897	C	A	ENSBTAT00000065610, ENSBTAG00000046383	Q->K	missense
chr1	33285885	C	T	ENSBTAT00000012150, ENSBTAG00000009219	L->L	synonymous
chr1	33388080	G	A	ENSBTAT00000012150, ENSBTAG00000009219	T->T	synonymous
chr1	33509095	C	T	ENSBTAT00000012150, ENSBTAG00000009219	D->D	synonymous
chr1	33509110	T	C	ENSBTAT00000012150, ENSBTAG00000009219	G->G	synonymous
chr1	34683650	A	C	ENSBTAT00000037060, ENSBTAG00000026156	I->R	missense
chr1	34683854	G	A	ENSBTAT00000037060, ENSBTAG00000026156	A->V	missense
chr1	34683854	G	A	NM_001191130, VGLL3	A->V	missense
chr1	34695072	C	G	ENSBTAT00000037060, ENSBTAG00000026156	M->I	missense
chr1	34695072	C	G	NM_001191130, VGLL3	M->I	missense
chr1	34707231	T	G	ENSBTAT00000037060, ENSBTAG00000026156	H->P	missense
chr1	34707231	T	G	NM_001191130, VGLL3	H->P	missense
chr1	34996161	G	A	ENSBTAT00000010436, ENSBTAG00000007939	E->E	synonymous
chr1	34996161	G	A	NM_001035472, CHMP2B	E->E	synonymous
chr1	35009083	C	T	ENSBTAT00000012033, ENSBTAG00000009128	L->L	synonymous
chr1	35009083	C	T	ENSBTAT00000056643, ENSBTAG00000009128	L->L	synonymous
chr1	35009083	C	T	NM_174579, POU1F1	L->L	synonymous
chr1	35013856	T	C	ENSBTAT00000012033, ENSBTAG00000009128	S->S	synonymous
chr1	35013856	T	C	ENSBTAT00000056643, ENSBTAG00000009128	S->S	synonymous
chr1	35013856	T	C	NM_174579, POU1F1	S->S	synonymous
chr1	35013897	A	G	ENSBTAT00000012033, ENSBTAG00000009128	L->L	synonymous
chr1	35013897	A	G	ENSBTAT00000056643, ENSBTAG00000009128	L->L	synonymous
chr1	35013897	A	G	NM_174579, POU1F1	L->L	synonymous
chr1	35013926	G	T	ENSBTAT00000012033, ENSBTAG00000009128	P->H	missense
chr1	35013926	G	T	ENSBTAT00000056643, ENSBTAG00000009128	P->H	missense
chr1	35013926	G	T	NM_174579, POU1F1	P->H	missense
chr1	35017793	T	C	ENSBTAT00000012033, ENSBTAG00000009128	P->P	synonymous
chr1	35021020	C	T	ENSBTAT00000012033, ENSBTAG00000009128	S->S	synonymous
chr1	35021020	C	T	ENSBTAT00000056643, ENSBTAG00000009128	S->S	synonymous
chr1	35021020	C	T	NM_174579, POU1F1	S->S	synonymous
chr1	35603246	G	A	ENSBTAT00000052346, ENSBTAG00000039151	A->A	synonymous
chr1	35603246	G	A	NM_001206605, HTR1F	A->A	synonymous
chr1	35603324	T	A	ENSBTAT00000052346, ENSBTAG00000039151	G->G	synonymous
chr1	35603324	T	A	NM_001206605, HTR1F	G->G	synonymous
chr1	35603657	A	G	ENSBTAT00000052346, ENSBTAG00000039151	K->K	synonymous
chr1	35603657	A	G	NM_001206605, HTR1F	K->K	synonymous
chr1	35603666	G	A	ENSBTAT00000052346, ENSBTAG00000039151	K->K	synonymous
chr1	35603666	G	A	NM_001206605, HTR1F	K->K	synonymous
chr1	35603682	T	C	ENSBTAT00000052346, ENSBTAG00000039151	Y->H	missense
chr1	35603682	T	C	NM_001206605, HTR1F	Y->H	missense
chr1	35603780	G	A	ENSBTAT00000052346, ENSBTAG00000039151	P->P	synonymous
chr1	35603780	G	A	NM_001206605, HTR1F	P->P	synonymous
chr1	35603802	T	G	ENSBTAT00000052346, ENSBTAG00000039151	S->A	missense
chr1	35603802	T	G	NM_001206605, HTR1F	S->A	missense
chr1	35603901	G	A	ENSBTAT00000052346, ENSBTAG00000039151	G->S	missense
chr1	35603901	G	A	NM_001206605, HTR1F	G->S	missense
chr1	35604142	G	A	ENSBTAT00000052346, ENSBTAG00000039151	R->Q	missense
chr1	35604142	G	A	NM_001206605, HTR1F	R->Q	missense
chr1	35737650	G	A	ENSBTAT00000032410, ENSBTAG00000023675	D->N	missense
chr1	35741383	C	G	ENSBTAT00000032410, ENSBTAG00000023675	Q->E	missense
chr1	35758691	G	C	ENSBTAT00000010480, ENSBTAG00000007970	V->V	synonymous
chr1	35758691	G	C	NM_001206451, C1H3orf38	V->V	synonymous
chr1	36089555	T	C	ENSBTAT00000064629, ENSBTAG00000045590	I->T	missense
chr1	36089630	C	T	ENSBTAT00000064629, ENSBTAG00000045590	T->M	missense
chr1	36089875	T	G	ENSBTAT00000064629, ENSBTAG00000045590	S->A	missense
chr1	36090064	T	C	ENSBTAT00000064629, ENSBTAG00000045590	C->R	missense
chr1	36715330	T	A	NM_001206113, EPHA3	L->H	missense
chr1	36985987	G	A	ENSBTAT00000008955, ENSBTAG00000006811	R->R	synonymous
chr1	36985987	G	A	NM_001206113, EPHA3	R->R	synonymous
chr1	37046602	G	A	ENSBTAT00000008955, ENSBTAG00000006811	G->D	missense
chr1	37046602	G	A	NM_001206113, EPHA3	G->D	missense
chr1	37046636	C	T	ENSBTAT00000008955, ENSBTAG00000006811	T->T	synonymous
chr1	37046636	C	T	NM_001206113, EPHA3	T->T	synonymous
chr1	37046654	C	T	ENSBTAT00000008955, ENSBTAG00000006811	T->T	synonymous
chr1	37046654	C	T	NM_001206113, EPHA3	T->T	synonymous
chr1	37101849	G	A	ENSBTAT00000008955, ENSBTAG00000006811	A->A	synonymous
chr1	37101849	G	A	NM_001206113, EPHA3	A->A	synonymous
chr1	37123424	T	C	ENSBTAT00000008955, ENSBTAG00000006811	V->V	synonymous
chr1	37123424	T	C	NM_001206113, EPHA3	V->V	synonymous
chr1	37808442	T	C	ENSBTAT00000032377, ENSBTAG00000023652	I->V	missense
chr1	37808442	T	C	NM_174438, PROS1	I->V	missense
chr1	37808456	C	G	ENSBTAT00000032377, ENSBTAG00000023652	G->A	missense
chr1	37808456	C	G	NM_174438, PROS1	G->A	missense
chr1	37811559	G	A	ENSBTAT00000032377, ENSBTAG00000023652	S->S	synonymous
chr1	37811559	G	A	NM_174438, PROS1	S->S	synonymous
chr1	37824068	A	G	ENSBTAT00000032377, ENSBTAG00000023652	T->T	synonymous
chr1	37824068	A	G	NM_174438, PROS1	T->T	synonymous
chr1	37824101	A	G	ENSBTAT00000032377, ENSBTAG00000023652	V->V	synonymous
chr1	37824101	A	G	NM_174438, PROS1	V->V	synonymous
chr1	37838909	G	A	ENSBTAT00000032377, ENSBTAG00000023652	S->S	synonymous
chr1	37838909	G	A	NM_174438, PROS1	S->S	synonymous
chr1	37866865	T	C	ENSBTAT00000032377, ENSBTAG00000023652	L->L	synonymous
chr1	37866865	T	C	NM_174438, PROS1	L->L	synonymous
chr1	37866892	G	C	ENSBTAT00000032377, ENSBTAG00000023652	T->T	synonymous
chr1	37866892	G	C	NM_174438, PROS1	T->T	synonymous
chr1	37915619	C	T	ENSBTAT00000006804, ENSBTAG00000005162	A->T	missense
chr1	37915619	C	T	NM_001075672, STX19	A->T	missense
chr1	37937348	T	C	ENSBTAT00000006796, ENSBTAG00000005155	F->S	missense
chr1	37961588	G	A	ENSBTAT00000020876, ENSBTAG00000015728	A->T	missense
chr1	37961588	G	A	NM_001076001, NSUN3	A->T	missense
chr1	37970452	C	T	ENSBTAT00000020876, ENSBTAG00000015728	S->L	missense
chr1	37970452	C	T	NM_001076001, NSUN3	S->L	missense
chr1	37970651	C	T	ENSBTAT00000020876, ENSBTAG00000015728	Y->Y	synonymous
chr1	37970651	C	T	NM_001076001, NSUN3	Y->Y	synonymous
chr1	40608744	C	T	ENSBTAT00000061591, ENSBTAG00000044111	P->S	missense
chr1	40608862	G	A	ENSBTAT00000061591, ENSBTAG00000044111	R->H	missense
chr1	40608924	A	T	ENSBTAT00000061591, ENSBTAG00000044111	R->W	missense
chr1	40608934	C	A	ENSBTAT00000061591, ENSBTAG00000044111	T->K	missense
chr1	40609099	A	G	ENSBTAT00000061591, ENSBTAG00000044111	N->S	missense
chr1	40701924	A	T	ENSBTAT00000061591, ENSBTAG00000044111	T->S	missense
chr1	40816120	C	T	ENSBTAT00000061591, ENSBTAG00000044111	T->T	synonymous
chr1	40816240	T	C	ENSBTAT00000061591, ENSBTAG00000044111	N->N	synonymous
chr1	40816342	A	G	ENSBTAT00000061591, ENSBTAG00000044111	T->T	synonymous
chr1	40816550	G	A	ENSBTAT00000061591, ENSBTAG00000044111	V->M	missense
chr1	40816778	G	A	ENSBTAT00000061591, ENSBTAG00000044111	D->N	missense
chr1	40996614	T	C	ENSBTAT00000061591, ENSBTAG00000044111	H->H	synonymous
chr1	41068439	A	G	ENSBTAT00000061591, ENSBTAG00000044111	N->S	missense
chr1	41278634	G	A	ENSBTAT00000061591, ENSBTAG00000044111	R->K	missense
chr1	41278652	G	A	ENSBTAT00000061591, ENSBTAG00000044111	R->Q	missense
chr1	41317166	C	T	ENSBTAT00000061591, ENSBTAG00000044111	T->T	synonymous
chr1	41643965	G	A	ENSBTAT00000013306, ENSBTAG00000010091	L->L	synonymous
chr1	41643965	G	A	NM_001075782, ARL6	L->L	synonymous
chr1	41657287	A	G	ENSBTAT00000013306, ENSBTAG00000010091	K->R	missense
chr1	41657287	A	G	NM_001075782, ARL6	K->R	missense
chr1	41745908	T	C	ENSBTAT00000063463, ENSBTAG00000047147	S->S	synonymous
chr1	41753538	A	G	ENSBTAT00000063463, ENSBTAG00000047147	K->K	synonymous
chr1	41753634	C	G	ENSBTAT00000063463, ENSBTAG00000047147	S->S	synonymous
chr1	41753991	T	A	ENSBTAT00000063463, ENSBTAG00000047147	S->R	missense
chr1	41754041	G	T	ENSBTAT00000063463, ENSBTAG00000047147	C->F	missense
chr1	41754144	A	G	ENSBTAT00000063463, ENSBTAG00000047147	G->G	synonymous
chr1	41754173	C	T	ENSBTAT00000063463, ENSBTAG00000047147	A->V	missense
chr1	41754458	C	A	ENSBTAT00000063463, ENSBTAG00000047147	P->Q	missense
chr1	41754493	G	A	ENSBTAT00000063463, ENSBTAG00000047147	A->T	missense
chr1	41754512	C	G	ENSBTAT00000063463, ENSBTAG00000047147	A->G	missense
chr1	41754558	T	A	ENSBTAT00000063463, ENSBTAG00000047147	L->L	synonymous
chr1	41754642	A	T	ENSBTAT00000063463, ENSBTAG00000047147	V->V	synonymous
chr1	41754955	C	T	ENSBTAT00000063463, ENSBTAG00000047147	P->S	missense
chr1	41755102	C	T	ENSBTAT00000063463, ENSBTAG00000047147	L->L	synonymous
chr1	41755139	T	C	ENSBTAT00000063463, ENSBTAG00000047147	V->A	missense
chr1	41755249	T	C	ENSBTAT00000063463, ENSBTAG00000047147	F->L	missense
chr1	41755411	G	A	ENSBTAT00000063463, ENSBTAG00000047147	D->N	missense
chr1	41755600	T	C	ENSBTAT00000063463, ENSBTAG00000047147	Y->H	missense
chr1	41755636	C	A	ENSBTAT00000063463, ENSBTAG00000047147	R->S	missense
chr1	41755993	C	T	ENSBTAT00000063463, ENSBTAG00000047147	P->S	missense
chr1	41756066	A	G	ENSBTAT00000063463, ENSBTAG00000047147	Y->C	missense
chr1	41756087	G	A	ENSBTAT00000063463, ENSBTAG00000047147	S->N	missense
chr1	41756207	C	T	ENSBTAT00000063463, ENSBTAG00000047147	P->L	missense
chr1	41756244	A	G	ENSBTAT00000063463, ENSBTAG00000047147	V->V	synonymous
chr1	41756440	G	A	ENSBTAT00000063463, ENSBTAG00000047147	A->T	missense
chr1	41756565	C	A	ENSBTAT00000063463, ENSBTAG00000047147	I->I	synonymous
chr1	41756662	A	G	ENSBTAT00000063463, ENSBTAG00000047147	K->E	missense
chr1	41756715	A	T	ENSBTAT00000063463, ENSBTAG00000047147	K->N	missense
chr1	41756774	A	G	ENSBTAT00000063463, ENSBTAG00000047147	Q->R	missense
chr1	41756790	C	T	ENSBTAT00000063463, ENSBTAG00000047147	A->A	synonymous
chr1	41756905	T	C	ENSBTAT00000063463, ENSBTAG00000047147	L->L	synonymous
chr1	41758751	G	A	ENSBTAT00000032404, ENSBTAG00000008346	R->Q	missense
chr1	41758980	A	G	ENSBTAT00000032404, ENSBTAG00000008346	E->E	synonymous
chr1	41759051	A	C	ENSBTAT00000032404, ENSBTAG00000008346	Q->P	missense
chr1	41761263	G	A	ENSBTAT00000032404, ENSBTAG00000008346	C->Y	missense
chr1	41762409	C	A	ENSBTAT00000032404, ENSBTAG00000008346	R->S	missense
chr1	41768691	G	T	ENSBTAT00000032404, ENSBTAG00000008346	V->F	missense
chr1	41830880	T	C	ENSBTAT00000020656, ENSBTAG00000015546	E->G	missense
chr1	41830880	T	C	NM_001015675, MINA	E->G	missense
chr1	41831717	G	A	ENSBTAT00000020656, ENSBTAG00000015546	T->T	synonymous
chr1	41831717	G	A	NM_001015675, MINA	T->T	synonymous
chr1	41845875	G	A	ENSBTAT00000020656, ENSBTAG00000015546	I->I	synonymous
chr1	41845875	G	A	NM_001015675, MINA	I->I	synonymous
chr1	41847088	G	C	ENSBTAT00000020656, ENSBTAG00000015546	P->P	synonymous
chr1	41847088	G	C	NM_001015675, MINA	P->P	synonymous
chr1	41876549	C	A	ENSBTAT00000001857, ENSBTAG00000001416	G->W	missense
chr1	41876549	C	A	NM_001192519, GABRR3	G->W	missense
chr1	41890660	G	A	ENSBTAT00000001857, ENSBTAG00000001416	S->S	synonymous
chr1	41890660	G	A	NM_001192519, GABRR3	S->S	synonymous
chr1	41906843	A	G	ENSBTAT00000001857, ENSBTAG00000001416	Y->Y	synonymous
chr1	41906843	A	G	NM_001192519, GABRR3	Y->Y	synonymous
chr1	41906851	G	A	ENSBTAT00000001857, ENSBTAG00000001416	L->L	synonymous
chr1	41906851	G	A	NM_001192519, GABRR3	L->L	synonymous
chr1	41915557	G	C	ENSBTAT00000001857, ENSBTAG00000001416	P->A	missense
chr1	41915557	G	C	NM_001192519, GABRR3	P->A	missense
chr1	41955593	G	A	ENSBTAT00000032401, ENSBTAG00000023668	G->E	missense
chr1	41955764	C	T	ENSBTAT00000032401, ENSBTAG00000023668	S->L	missense
chr1	41955795	C	A	ENSBTAT00000032401, ENSBTAG00000023668	V->V	synonymous
chr1	41956008	G	A	ENSBTAT00000032401, ENSBTAG00000023668	L->L	synonymous
chr1	41956212	C	T	ENSBTAT00000032401, ENSBTAG00000023668	L->L	synonymous
chr1	41956221	A	C	ENSBTAT00000032401, ENSBTAG00000023668	I->I	synonymous
chr1	41956266	C	T	ENSBTAT00000032401, ENSBTAG00000023668	T->T	synonymous
chr1	41956370	C	A	ENSBTAT00000032401, ENSBTAG00000023668	S->*	stop-gain
chr1	41997959	G	T	ENSBTAT00000064175, ENSBTAG00000047095	M->I	missense
chr1	41997985	T	C	ENSBTAT00000064175, ENSBTAG00000047095	M->T	missense
chr1	41998061	C	T	ENSBTAT00000064175, ENSBTAG00000047095	Y->Y	synonymous
chr1	41998214	A	G	ENSBTAT00000064175, ENSBTAG00000047095	L->L	synonymous
chr1	41998276	A	G	ENSBTAT00000064175, ENSBTAG00000047095	N->S	missense
chr1	41998427	C	T	ENSBTAT00000064175, ENSBTAG00000047095	A->A	synonymous
chr1	41998442	G	T	ENSBTAT00000064175, ENSBTAG00000047095	L->F	missense
chr1	41998568	G	A	ENSBTAT00000064175, ENSBTAG00000047095	A->A	synonymous
chr1	41998862	A	G	ENSBTAT00000064175, ENSBTAG00000047095	R->R	synonymous
chr1	41998867	T	A	ENSBTAT00000064175, ENSBTAG00000047095	I->K	missense
chr1	42095473	A	T	ENSBTAT00000008047, ENSBTAG00000022908	I->F	missense
chr1	42095489	T	C	ENSBTAT00000008047, ENSBTAG00000022908	I->T	missense
chr1	42095536	A	G	ENSBTAT00000008047, ENSBTAG00000022908	I->V	missense
chr1	42095646	T	C	ENSBTAT00000008047, ENSBTAG00000022908	D->D	synonymous
chr1	42095848	A	G	ENSBTAT00000008047, ENSBTAG00000022908	N->D	missense
chr1	42095937	G	A	ENSBTAT00000008047, ENSBTAG00000022908	T->T	synonymous
chr1	42096035	C	T	ENSBTAT00000008047, ENSBTAG00000022908	S->F	missense
chr1	42096148	T	G	ENSBTAT00000008047, ENSBTAG00000022908	F->V	missense
chr1	42096277	A	G	ENSBTAT00000008047, ENSBTAG00000022908	I->V	missense
chr1	42119034	G	A	ENSBTAT00000018558, ENSBTAG00000027113	K->K	synonymous
chr1	42119089	A	G	ENSBTAT00000018558, ENSBTAG00000027113	T->A	missense
chr1	42119091	G	A	ENSBTAT00000018558, ENSBTAG00000027113	T->T	synonymous
chr1	42119124	G	T	ENSBTAT00000018558, ENSBTAG00000027113	L->L	synonymous
chr1	42119136	A	G	ENSBTAT00000018558, ENSBTAG00000027113	I->M	missense
chr1	42119156	C	T	ENSBTAT00000018558, ENSBTAG00000027113	T->M	missense
chr1	42119177	T	C	ENSBTAT00000018558, ENSBTAG00000027113	V->A	missense
chr1	42119235	G	A	ENSBTAT00000018558, ENSBTAG00000027113	L->L	synonymous
chr1	42119313	A	T	ENSBTAT00000018558, ENSBTAG00000027113	I->I	synonymous
chr1	42119321	C	T	ENSBTAT00000018558, ENSBTAG00000027113	S->F	missense
chr1	42119326	T	G	ENSBTAT00000018558, ENSBTAG00000027113	C->G	missense
chr1	42119345	T	C	ENSBTAT00000018558, ENSBTAG00000027113	L->S	missense
chr1	42119355	C	T	ENSBTAT00000018558, ENSBTAG00000027113	V->V	synonymous
chr1	42119394	G	A	ENSBTAT00000018558, ENSBTAG00000027113	S->S	synonymous
chr1	42119439	G	A	ENSBTAT00000018558, ENSBTAG00000027113	A->A	synonymous
chr1	42119457	A	G	ENSBTAT00000018558, ENSBTAG00000027113	Q->Q	synonymous
chr1	42119506	T	G	ENSBTAT00000018558, ENSBTAG00000027113	L->V	missense
chr1	42119517	G	A	ENSBTAT00000018558, ENSBTAG00000027113	T->T	synonymous
chr1	42119622	C	T	ENSBTAT00000018558, ENSBTAG00000027113	N->N	synonymous
chr1	42119757	C	T	ENSBTAT00000018558, ENSBTAG00000027113	T->T	synonymous
chr1	42119796	T	C	ENSBTAT00000018558, ENSBTAG00000027113	G->G	synonymous
chr1	42119811	G	T	ENSBTAT00000018558, ENSBTAG00000027113	M->I	missense
chr1	42119837	C	A	ENSBTAT00000018558, ENSBTAG00000027113	A->E	missense
chr1	42203188	T	A	ENSBTAT00000008053, ENSBTAG00000033437	V->E	missense
chr1	42203268	T	C	ENSBTAT00000008053, ENSBTAG00000033437	L->L	synonymous
chr1	42203398	G	C	ENSBTAT00000008053, ENSBTAG00000033437	W->S	missense
chr1	42203416	C	T	ENSBTAT00000008053, ENSBTAG00000033437	T->M	missense
chr1	42203592	A	G	ENSBTAT00000008053, ENSBTAG00000033437	T->A	missense
chr1	42203610	C	T	ENSBTAT00000008053, ENSBTAG00000033437	R->W	missense
chr1	42203841	C	T	ENSBTAT00000008053, ENSBTAG00000033437	L->F	missense
chr1	42203913	C	T	ENSBTAT00000008053, ENSBTAG00000033437	H->Y	missense
chr1	42203940	A	G	ENSBTAT00000008053, ENSBTAG00000033437	R->G	missense
chr1	42308640	T	C	ENSBTAT00000065496, ENSBTAG00000047371	I->M	missense
chr1	42308816	A	G	ENSBTAT00000065496, ENSBTAG00000047371	V->A	missense
chr1	42308916	C	T	ENSBTAT00000065496, ENSBTAG00000047371	A->T	missense
chr1	42309156	G	A	ENSBTAT00000065496, ENSBTAG00000047371	L->F	missense
chr1	42309526	C	A	ENSBTAT00000065496, ENSBTAG00000047371	V->L	missense
chr1	42358231	A	G	ENSBTAT00000054123, ENSBTAG00000037820	E->E	synonymous
chr1	42358320	C	T	ENSBTAT00000054123, ENSBTAG00000037820	T->I	missense
chr1	42358383	G	T	ENSBTAT00000054123, ENSBTAG00000037820	R->L	missense
chr1	42358421	G	A	ENSBTAT00000054123, ENSBTAG00000037820	A->T	missense
chr1	42358437	G	A	ENSBTAT00000054123, ENSBTAG00000037820	C->Y	missense
chr1	42358504	C	T	ENSBTAT00000054123, ENSBTAG00000037820	L->L	synonymous
chr1	42358692	T	C	ENSBTAT00000054123, ENSBTAG00000037820	M->T	missense
chr1	42358949	T	C	ENSBTAT00000054123, ENSBTAG00000037820	S->P	missense
chr1	42359000	G	A	ENSBTAT00000054123, ENSBTAG00000037820	V->I	missense
chr1	42359137	G	A	ENSBTAT00000054123, ENSBTAG00000037820	M->I	missense
chr1	42420126	G	A	ENSBTAT00000014524, ENSBTAG00000027782	G->S	missense
chr1	42452962	C	T	ENSBTAT00000027961, ENSBTAG00000020996	A->T	missense
chr1	42452962	C	T	NM_001206357, CLDND1	A->T	missense
chr1	42469266	G	A	ENSBTAT00000027963, ENSBTAG00000020997	V->M	missense
chr1	42523931	G	A	ENSBTAT00000005398, ENSBTAG00000004124	L->L	synonymous
chr1	42523931	G	A	NM_001192393, CPOX	L->L	synonymous
chr1	42527220	G	A	ENSBTAT00000005398, ENSBTAG00000004124	A->V	missense
chr1	42527220	G	A	NM_001192393, CPOX	A->V	missense
chr1	42531076	C	T	ENSBTAT00000005398, ENSBTAG00000004124	E->E	synonymous
chr1	42531076	C	T	NM_001192393, CPOX	E->E	synonymous
chr1	42531106	C	A	ENSBTAT00000005398, ENSBTAG00000004124	A->A	synonymous
chr1	42531106	C	A	NM_001192393, CPOX	A->A	synonymous
chr1	42531181	C	G	ENSBTAT00000005398, ENSBTAG00000004124	A->A	synonymous
chr1	42531181	C	G	NM_001192393, CPOX	A->A	synonymous
chr1	42531250	G	A	ENSBTAT00000005398, ENSBTAG00000004124	R->R	synonymous
chr1	42531250	G	A	NM_001192393, CPOX	R->R	synonymous
chr1	42531352	A	G	ENSBTAT00000005398, ENSBTAG00000004124	C->C	synonymous
chr1	42531352	A	G	NM_001192393, CPOX	C->C	synonymous
chr1	42567036	T	C	ENSBTAT00000032398, ENSBTAG00000023666	Y->Y	synonymous
chr1	42567036	T	C	ENSBTAT00000064354, ENSBTAG00000023666	Y->Y	synonymous
chr1	42567046	A	G	ENSBTAT00000032398, ENSBTAG00000023666	I->V	missense
chr1	42567046	A	G	ENSBTAT00000064354, ENSBTAG00000023666	I->V	missense
chr1	42571281	T	G	ENSBTAT00000032398, ENSBTAG00000023666	F->V	missense
chr1	42571281	T	G	ENSBTAT00000064354, ENSBTAG00000023666	F->V	missense
chr1	42733166	G	A	ENSBTAT00000005868, ENSBTAG00000004471	P->P	synonymous
chr1	42733166	G	A	NM_001002883, ST3GAL6	P->P	synonymous
chr1	42737646	T	C	ENSBTAT00000005868, ENSBTAG00000004471	S->S	synonymous
chr1	42737646	T	C	NM_001002883, ST3GAL6	S->S	synonymous
chr1	42743955	C	T	ENSBTAT00000019822, ENSBTAG00000014889	E->K	missense
chr1	42743955	C	T	NM_001205911, DCBLD2	E->K	missense
chr1	42744157	T	C	ENSBTAT00000019822, ENSBTAG00000014889	T->T	synonymous
chr1	42744157	T	C	NM_001205911, DCBLD2	T->T	synonymous
chr1	42744175	G	A	ENSBTAT00000019822, ENSBTAG00000014889	T->T	synonymous
chr1	42744175	G	A	NM_001205911, DCBLD2	T->T	synonymous
chr1	42758601	C	T	ENSBTAT00000019822, ENSBTAG00000014889	R->H	missense
chr1	42758601	C	T	NM_001205911, DCBLD2	R->H	missense
chr1	42762259	C	T	ENSBTAT00000019822, ENSBTAG00000014889	V->V	synonymous
chr1	42762259	C	T	NM_001205911, DCBLD2	V->V	synonymous
chr1	42762328	C	T	ENSBTAT00000019822, ENSBTAG00000014889	M->I	missense
chr1	42762328	C	T	NM_001205911, DCBLD2	M->I	missense
chr1	42767020	G	A	ENSBTAT00000019822, ENSBTAG00000014889	S->S	synonymous
chr1	42767020	G	A	NM_001205911, DCBLD2	S->S	synonymous
chr1	42767463	T	C	ENSBTAT00000019822, ENSBTAG00000014889	I->V	missense
chr1	42767463	T	C	NM_001205911, DCBLD2	I->V	missense
chr1	42784052	A	G	ENSBTAT00000019822, ENSBTAG00000014889	H->H	synonymous
chr1	42784052	A	G	NM_001205911, DCBLD2	H->H	synonymous
chr1	42784130	A	G	ENSBTAT00000019822, ENSBTAG00000014889	C->C	synonymous
chr1	42784130	A	G	NM_001205911, DCBLD2	C->C	synonymous
chr1	42826045	C	A	NM_001205911, DCBLD2	S->I	missense
chr1	43709987	C	A	ENSBTAT00000018159, ENSBTAG00000013662	H->Q	missense
chr1	43709987	C	A	NM_001101176, COL8A1	H->Q	missense
chr1	43710017	A	G	ENSBTAT00000018159, ENSBTAG00000013662	L->L	synonymous
chr1	43710017	A	G	NM_001101176, COL8A1	L->L	synonymous
chr1	43710083	A	G	ENSBTAT00000018159, ENSBTAG00000013662	V->V	synonymous
chr1	43710083	A	G	NM_001101176, COL8A1	V->V	synonymous
chr1	43713411	C	T	ENSBTAT00000018159, ENSBTAG00000013662	F->F	synonymous
chr1	43713411	C	T	NM_001101176, COL8A1	F->F	synonymous
chr1	43713522	C	T	ENSBTAT00000018159, ENSBTAG00000013662	P->P	synonymous
chr1	43713522	C	T	NM_001101176, COL8A1	P->P	synonymous
chr1	43713579	C	T	ENSBTAT00000018159, ENSBTAG00000013662	I->I	synonymous
chr1	43713579	C	T	NM_001101176, COL8A1	I->I	synonymous
chr1	43713972	G	C	ENSBTAT00000018159, ENSBTAG00000013662	G->G	synonymous
chr1	43713972	G	C	NM_001101176, COL8A1	G->G	synonymous
chr1	43714032	A	G	ENSBTAT00000018159, ENSBTAG00000013662	R->R	synonymous
chr1	43714032	A	G	NM_001101176, COL8A1	R->R	synonymous
chr1	43714166	C	A	ENSBTAT00000018159, ENSBTAG00000013662	P->Q	missense
chr1	43714166	C	A	NM_001101176, COL8A1	P->Q	missense
chr1	43714344	T	C	ENSBTAT00000018159, ENSBTAG00000013662	P->P	synonymous
chr1	43714344	T	C	NM_001101176, COL8A1	P->P	synonymous
chr1	43714480	G	A	ENSBTAT00000018159, ENSBTAG00000013662	G->S	missense
chr1	43714480	G	A	NM_001101176, COL8A1	G->S	missense
chr1	43714530	G	A	ENSBTAT00000018159, ENSBTAG00000013662	A->A	synonymous
chr1	43714530	G	A	NM_001101176, COL8A1	A->A	synonymous
chr1	43714734	A	G	ENSBTAT00000018159, ENSBTAG00000013662	V->V	synonymous
chr1	43714734	A	G	NM_001101176, COL8A1	V->V	synonymous
chr1	43714878	C	T	ENSBTAT00000018159, ENSBTAG00000013662	H->H	synonymous
chr1	43714878	C	T	NM_001101176, COL8A1	H->H	synonymous
chr1	43730066	G	A	ENSBTAT00000018160, ENSBTAG00000013663	Q->Q	synonymous
chr1	43730066	G	A	NM_001038215, CMSS1	Q->Q	synonymous
chr1	43757573	G	A	ENSBTAT00000018161, ENSBTAG00000013664	D->D	synonymous
chr1	43757828	T	C	ENSBTAT00000018161, ENSBTAG00000013664	A->A	synonymous
chr1	43758040	G	C	ENSBTAT00000018161, ENSBTAG00000013664	P->A	missense
chr1	43758684	C	T	ENSBTAT00000018161, ENSBTAG00000013664	R->H	missense
chr1	43758707	C	T	ENSBTAT00000018161, ENSBTAG00000013664	L->L	synonymous
chr1	43758988	C	T	ENSBTAT00000018161, ENSBTAG00000013664	D->N	missense
chr1	43759154	T	C	ENSBTAT00000018161, ENSBTAG00000013664	K->K	synonymous
chr1	43759529	T	C	ENSBTAT00000018161, ENSBTAG00000013664	K->K	synonymous
chr1	43760013	C	T	ENSBTAT00000018161, ENSBTAG00000013664	R->K	missense
chr1	43760074	T	C	ENSBTAT00000018161, ENSBTAG00000013664	K->E	missense
chr1	44110982	G	A	ENSBTAT00000018160, ENSBTAG00000013663	L->L	synonymous
chr1	44110982	G	A	NM_001038215, CMSS1	L->L	synonymous
chr1	44114494	G	A	ENSBTAT00000018160, ENSBTAG00000013663	R->H	missense
chr1	44114494	G	A	NM_001038215, CMSS1	R->H	missense
chr1	44124239	A	G	ENSBTAT00000018160, ENSBTAG00000013663	N->S	missense
chr1	44124239	A	G	NM_001038215, CMSS1	N->S	missense
chr1	44140535	T	C	ENSBTAT00000018165, ENSBTAG00000013667	I->I	synonymous
chr1	44140535	T	C	NM_001038150, TMEM30C	I->I	synonymous
chr1	44148802	C	T	ENSBTAT00000018165, ENSBTAG00000013667	T->T	synonymous
chr1	44148802	C	T	NM_001038150, TMEM30C	T->T	synonymous
chr1	44199362	G	A	ENSBTAT00000032386, ENSBTAG00000015010	G->D	missense
chr1	44217502	A	G	ENSBTAT00000032386, ENSBTAG00000015010	N->S	missense
chr1	44229291	C	T	ENSBTAT00000032386, ENSBTAG00000015010	A->V	missense
chr1	44230697	C	T	ENSBTAT00000032386, ENSBTAG00000015010	D->D	synonymous
chr1	44232125	G	T	ENSBTAT00000032386, ENSBTAG00000015010	S->S	synonymous
chr1	44274183	C	T	ENSBTAT00000006347, ENSBTAG00000004833	S->L	missense
chr1	44274183	C	T	NM_001038133, NIT2	S->L	missense
chr1	44274748	T	C	ENSBTAT00000006347, ENSBTAG00000004833	F->F	synonymous
chr1	44274748	T	C	NM_001038133, NIT2	F->F	synonymous
chr1	44274754	G	A	ENSBTAT00000006347, ENSBTAG00000004833	E->E	synonymous
chr1	44274754	G	A	NM_001038133, NIT2	E->E	synonymous
chr1	44280575	G	A	ENSBTAT00000006347, ENSBTAG00000004833	V->M	missense
chr1	44280575	G	A	NM_001038133, NIT2	V->M	missense
chr1	44307396	G	A	ENSBTAT00000019001, ENSBTAG00000014302	A->A	synonymous
chr1	44307396	G	A	NM_001075328, TOMM70A	A->A	synonymous
chr1	44331501	A	G	ENSBTAT00000019001, ENSBTAG00000014302	A->A	synonymous
chr1	44331501	A	G	NM_001075328, TOMM70A	A->A	synonymous
chr1	44365824	G	A	ENSBTAT00000048786, ENSBTAG00000034442	S->S	synonymous
chr1	44365824	G	A	ENSBTAT00000064152, ENSBTAG00000034442	S->S	synonymous
chr1	44365824	G	A	NM_001205535, LNP1	S->S	synonymous
chr1	44365923	C	T	ENSBTAT00000048786, ENSBTAG00000034442	F->F	synonymous
chr1	44365923	C	T	ENSBTAT00000064152, ENSBTAG00000034442	F->F	synonymous
chr1	44365923	C	T	NM_001205535, LNP1	F->F	synonymous
chr1	44370135	C	T	ENSBTAT00000048786, ENSBTAG00000034442	L->L	synonymous
chr1	44370135	C	T	ENSBTAT00000064152, ENSBTAG00000034442	L->L	synonymous
chr1	44370135	C	T	NM_001205535, LNP1	L->L	synonymous
chr1	44450096	C	T	ENSBTAT00000017716, ENSBTAG00000013321	F->F	synonymous
chr1	44450096	C	T	NM_001105624, LOC529036	F->F	synonymous
chr1	44450111	T	C	ENSBTAT00000017716, ENSBTAG00000013321	S->S	synonymous
chr1	44450111	T	C	NM_001105624, LOC529036	S->S	synonymous
chr1	44464520	A	G	ENSBTAT00000017716, ENSBTAG00000013321	M->V	missense
chr1	44464520	A	G	NM_001105624, LOC529036	M->V	missense
chr1	44464616	C	T	ENSBTAT00000017716, ENSBTAG00000013321	R->W	missense
chr1	44464616	C	T	NM_001105624, LOC529036	R->W	missense
chr1	44647741	C	G	ENSBTAT00000061194, ENSBTAG00000013806	G->R	missense
chr1	44647741	C	G	NM_001206608, EFHB	G->R	missense
chr1	44647744	C	T	ENSBTAT00000061194, ENSBTAG00000013806	D->N	missense
chr1	44647744	C	T	NM_001206608, EFHB	D->N	missense
chr1	44652737	T	A	ENSBTAT00000061194, ENSBTAG00000013806	R->*	stop-gain
chr1	44652737	T	A	NM_001206608, EFHB	R->*	stop-gain
chr1	44657432	T	C	ENSBTAT00000061194, ENSBTAG00000013806	K->R	missense
chr1	44657432	T	C	NM_001206608, EFHB	K->R	missense
chr1	44670588	A	C	ENSBTAT00000061194, ENSBTAG00000013806	F->C	missense
chr1	44670588	A	C	NM_001206608, EFHB	F->C	missense
chr1	44670604	A	G	ENSBTAT00000061194, ENSBTAG00000013806	Y->H	missense
chr1	44670604	A	G	NM_001206608, EFHB	Y->H	missense
chr1	44712132	C	T	ENSBTAT00000061194, ENSBTAG00000013806	G->E	missense
chr1	44712132	C	T	NM_001206608, EFHB	G->E	missense
chr1	44712252	A	G	ENSBTAT00000061194, ENSBTAG00000013806	L->P	missense
chr1	44712252	A	G	NM_001206608, EFHB	L->P	missense
chr1	44712299	C	G	ENSBTAT00000061194, ENSBTAG00000013806	R->S	missense
chr1	44712299	C	G	NM_001206608, EFHB	R->S	missense
chr1	44712335	C	T	ENSBTAT00000061194, ENSBTAG00000013806	L->L	synonymous
chr1	44712335	C	T	NM_001206608, EFHB	L->L	synonymous
chr1	44712520	A	G	ENSBTAT00000061194, ENSBTAG00000013806	L->L	synonymous
chr1	44712520	A	G	NM_001206608, EFHB	L->L	synonymous
chr1	44712874	G	C	NM_001206608, EFHB	L->V	missense
chr1	44712946	C	T	ENSBTAT00000061194, ENSBTAG00000013806	G->R	missense
chr1	44712946	C	T	NM_001206608, EFHB	G->R	missense
chr1	44712950	G	T	ENSBTAT00000061194, ENSBTAG00000013806	P->P	synonymous
chr1	44712950	G	T	NM_001206608, EFHB	P->P	synonymous
chr1	44755502	C	T	ENSBTAT00000005303, ENSBTAG00000004061	A->A	synonymous
chr1	44755760	C	G	ENSBTAT00000005303, ENSBTAG00000004061	E->D	missense
chr1	44755898	T	C	ENSBTAT00000005303, ENSBTAG00000004061	T->T	synonymous
chr1	44755960	T	C	ENSBTAT00000005303, ENSBTAG00000004061	I->V	missense
chr1	44769677	T	G	ENSBTAT00000005303, ENSBTAG00000004061	R->S	missense
chr1	44769677	T	G	ENSBTAT00000065926, ENSBTAG00000004061	R->S	missense
chr1	44769802	C	T	ENSBTAT00000005303, ENSBTAG00000004061	V->M	missense
chr1	44769802	C	T	ENSBTAT00000065926, ENSBTAG00000004061	V->M	missense
chr1	44770665	C	T	ENSBTAT00000005303, ENSBTAG00000004061	-	splice-site
chr1	44770665	C	T	ENSBTAT00000065926, ENSBTAG00000004061	-	splice-site
chr1	44876594	C	T	ENSBTAT00000000994, ENSBTAG00000000746	H->H	synonymous
chr1	44881053	T	C	ENSBTAT00000000994, ENSBTAG00000000746	P->P	synonymous
chr1	44913915	G	A	ENSBTAT00000000994, ENSBTAG00000000746	D->N	missense
chr1	44922422	G	A	ENSBTAT00000000994, ENSBTAG00000000746	P->P	synonymous
chr1	44949225	C	T	ENSBTAT00000000999, ENSBTAG00000000752	T->T	synonymous
chr1	44949225	C	T	ENSBTAT00000001001, ENSBTAG00000000752	T->T	synonymous
chr1	44949225	C	T	NM_001081617, SGOL1	T->T	synonymous
chr1	44949329	T	C	ENSBTAT00000000999, ENSBTAG00000000752	T->A	missense
chr1	44949329	T	C	ENSBTAT00000001001, ENSBTAG00000000752	T->A	missense
chr1	44949329	T	C	NM_001081617, SGOL1	T->A	missense
chr1	44956629	C	T	ENSBTAT00000000999, ENSBTAG00000000752	T->T	synonymous
chr1	44956629	C	T	ENSBTAT00000001001, ENSBTAG00000000752	T->T	synonymous
chr1	44956629	C	T	NM_001081617, SGOL1	T->T	synonymous
chr1	44956977	C	T	ENSBTAT00000000999, ENSBTAG00000000752	A->A	synonymous
chr1	44956977	C	T	ENSBTAT00000001001, ENSBTAG00000000752	A->A	synonymous
chr1	44956977	C	T	NM_001081617, SGOL1	A->A	synonymous
chr1	44957068	T	C	ENSBTAT00000000999, ENSBTAG00000000752	Q->R	missense
chr1	44957068	T	C	ENSBTAT00000001001, ENSBTAG00000000752	Q->R	missense
chr1	44957068	T	C	NM_001081617, SGOL1	Q->R	missense
chr1	44957180	T	C	ENSBTAT00000000999, ENSBTAG00000000752	R->G	missense
chr1	44957180	T	C	ENSBTAT00000001001, ENSBTAG00000000752	R->G	missense
chr1	44957180	T	C	NM_001081617, SGOL1	R->G	missense
chr1	44957210	A	G	ENSBTAT00000000999, ENSBTAG00000000752	S->P	missense
chr1	44957210	A	G	ENSBTAT00000001001, ENSBTAG00000000752	S->P	missense
chr1	44957210	A	G	NM_001081617, SGOL1	S->P	missense
chr1	44957285	G	A	ENSBTAT00000000999, ENSBTAG00000000752	R->C	missense
chr1	44957285	G	A	ENSBTAT00000001001, ENSBTAG00000000752	R->C	missense
chr1	44957285	G	A	NM_001081617, SGOL1	R->C	missense
chr1	44963173	A	G	ENSBTAT00000001001, ENSBTAG00000000752	N->N	synonymous
chr1	44963908	G	A	ENSBTAT00000000999, ENSBTAG00000000752	A->V	missense
chr1	44963908	G	A	ENSBTAT00000001001, ENSBTAG00000000752	A->V	missense
chr1	44963908	G	A	NM_001081617, SGOL1	A->V	missense
chr1	45021294	G	A	ENSBTAT00000002795, ENSBTAG00000004538	P->P	synonymous
chr1	45021322	A	G	ENSBTAT00000002795, ENSBTAG00000004538	R->G	missense
chr1	45022211	A	T	ENSBTAT00000002795, ENSBTAG00000004538	P->P	synonymous
chr1	45026526	A	G	ENSBTAT00000002795, ENSBTAG00000004538	N->S	missense
chr1	45028357	T	C	ENSBTAT00000002795, ENSBTAG00000004538	F->S	missense
chr1	45028440	G	A	ENSBTAT00000002795, ENSBTAG00000004538	G->R	missense
chr1	45029346	A	G	ENSBTAT00000002795, ENSBTAG00000004538	E->G	missense
chr1	45029660	A	G	ENSBTAT00000002795, ENSBTAG00000004538	S->G	missense
chr1	45029699	A	G	ENSBTAT00000002795, ENSBTAG00000004538	I->V	missense
chr1	45030500	A	G	ENSBTAT00000002795, ENSBTAG00000004538	R->G	missense
chr1	45031728	T	C	ENSBTAT00000002795, ENSBTAG00000004538	D->D	synonymous
chr1	45031761	T	A	ENSBTAT00000002795, ENSBTAG00000004538	H->Q	missense
chr1	45031848	C	T	ENSBTAT00000002795, ENSBTAG00000004538	L->L	synonymous
chr1	45031867	A	C	ENSBTAT00000002795, ENSBTAG00000004538	S->R	missense
chr1	45031889	G	C	ENSBTAT00000002795, ENSBTAG00000004538	G->A	missense
chr1	45033734	G	A	ENSBTAT00000002795, ENSBTAG00000004538	S->N	missense
chr1	45033795	T	C	ENSBTAT00000002795, ENSBTAG00000004538	R->R	synonymous
chr1	45033800	T	C	ENSBTAT00000002795, ENSBTAG00000004538	V->A	missense
chr1	45033900	G	A	ENSBTAT00000002795, ENSBTAG00000004538	V->V	synonymous
chr1	45033918	A	G	ENSBTAT00000002795, ENSBTAG00000004538	E->E	synonymous
chr1	45034036	A	T	ENSBTAT00000002795, ENSBTAG00000004538	R->W	missense
chr1	45034036	A	C	ENSBTAT00000002795, ENSBTAG00000004538	R->R	synonymous
chr1	45074824	C	T	ENSBTAT00000005967, ENSBTAG00000004538	T->M	missense
chr1	45074824	C	T	NM_001101948, ZNF596	T->M	missense
chr1	45077719	T	A	ENSBTAT00000005967, ENSBTAG00000004538	S->R	missense
chr1	45077719	T	A	NM_001101948, ZNF596	S->R	missense
chr1	45077853	G	T	ENSBTAT00000005967, ENSBTAG00000004538	G->V	missense
chr1	45077853	G	T	NM_001101948, ZNF596	G->V	missense
chr1	45078078	G	A	ENSBTAT00000002795, ENSBTAG00000004538	R->K	missense
chr1	45078078	G	A	ENSBTAT00000005967, ENSBTAG00000004538	R->K	missense
chr1	45078078	G	A	NM_001101948, ZNF596	R->K	missense
chr1	45091121	A	C	ENSBTAT00000064904, ENSBTAG00000047076	R->R	synonymous
chr1	45366519	C	T	ENSBTAT00000005845, ENSBTAG00000004459	N->N	synonymous
chr1	45366519	C	T	NM_001075405, TMEM45A	N->N	synonymous
chr1	45366552	C	T	ENSBTAT00000005845, ENSBTAG00000004459	F->F	synonymous
chr1	45366552	C	T	NM_001075405, TMEM45A	F->F	synonymous
chr1	45367998	G	A	ENSBTAT00000005845, ENSBTAG00000004459	G->E	missense
chr1	45367998	G	A	NM_001075405, TMEM45A	G->E	missense
chr1	45370084	G	A	ENSBTAT00000005845, ENSBTAG00000004459	V->V	synonymous
chr1	45370084	G	A	NM_001075405, TMEM45A	V->V	synonymous
chr1	45415345	C	G	ENSBTAT00000016106, ENSBTAG00000012140	G->G	synonymous
chr1	45415345	C	G	NM_001083702, GPR128	G->G	synonymous
chr1	45415388	G	A	ENSBTAT00000016106, ENSBTAG00000012140	V->M	missense
chr1	45415388	G	A	NM_001083702, GPR128	V->M	missense
chr1	45436747	G	C	ENSBTAT00000016106, ENSBTAG00000012140	E->Q	missense
chr1	45436747	G	C	NM_001083702, GPR128	E->Q	missense
chr1	45440446	A	G	ENSBTAT00000016106, ENSBTAG00000012140	S->G	missense
chr1	45440446	A	G	NM_001083702, GPR128	S->G	missense
chr1	45449708	A	G	ENSBTAT00000016106, ENSBTAG00000012140	V->V	synonymous
chr1	45449708	A	G	NM_001083702, GPR128	V->V	synonymous
chr1	45449863	G	A	ENSBTAT00000016106, ENSBTAG00000012140	R->H	missense
chr1	45449863	G	A	NM_001083702, GPR128	R->H	missense
chr1	45462676	G	A	ENSBTAT00000016106, ENSBTAG00000012140	S->N	missense
chr1	45462676	G	A	NM_001083702, GPR128	S->N	missense
chr1	45468131	C	T	ENSBTAT00000016106, ENSBTAG00000012140	V->V	synonymous
chr1	45468131	C	T	NM_001083702, GPR128	V->V	synonymous
chr1	45468140	G	A	ENSBTAT00000016106, ENSBTAG00000012140	L->L	synonymous
chr1	45468140	G	A	NM_001083702, GPR128	L->L	synonymous
chr1	45470319	A	C	ENSBTAT00000016106, ENSBTAG00000012140	L->F	missense
chr1	45470319	A	C	NM_001083702, GPR128	L->F	missense
chr1	45477716	C	T	ENSBTAT00000016106, ENSBTAG00000012140	T->T	synonymous
chr1	45477716	C	T	NM_001083702, GPR128	T->T	synonymous
chr1	45477780	C	T	ENSBTAT00000016106, ENSBTAG00000012140	R->W	missense
chr1	45477780	C	T	NM_001083702, GPR128	R->W	missense
chr1	45520599	C	T	ENSBTAT00000004503, ENSBTAG00000016363	F->F	synonymous
chr1	45520599	C	T	NM_001192976, TFG	F->F	synonymous
chr1	45520659	T	A	ENSBTAT00000004503, ENSBTAG00000016363	P->P	synonymous
chr1	45520659	T	A	NM_001192976, TFG	P->P	synonymous
chr1	45520723	A	C	ENSBTAT00000004503, ENSBTAG00000016363	T->P	missense
chr1	45520723	A	C	NM_001192976, TFG	T->P	missense
chr1	45520776	A	G	ENSBTAT00000004503, ENSBTAG00000016363	P->P	synonymous
chr1	45520776	A	G	NM_001192976, TFG	P->P	synonymous
chr1	45520910	A	G	ENSBTAT00000004503, ENSBTAG00000016363	Y->C	missense
chr1	45520910	A	G	NM_001192976, TFG	Y->C	missense
chr1	45558093	C	T	ENSBTAT00000021766, ENSBTAG00000048157	V->V	synonymous
chr1	45558144	A	G	ENSBTAT00000021766, ENSBTAG00000048157	N->N	synonymous
chr1	45566915	T	C	ENSBTAT00000021766, ENSBTAG00000048157	E->E	synonymous
chr1	45572444	A	T	ENSBTAT00000021766, ENSBTAG00000048157	G->G	synonymous
chr1	45596421	G	C	ENSBTAT00000021766, ENSBTAG00000048157	D->E	missense
chr1	45600688	G	A	ENSBTAT00000021766, ENSBTAG00000048157	P->P	synonymous
chr1	45613724	C	T	ENSBTAT00000021766, ENSBTAG00000048157	A->T	missense
chr1	45613762	T	G	ENSBTAT00000021766, ENSBTAG00000048157	Q->P	missense
chr1	45614509	A	G	ENSBTAT00000021766, ENSBTAG00000048157	-	splice-site
chr1	45615061	G	A	ENSBTAT00000021766, ENSBTAG00000048157	T->T	synonymous
chr1	45616744	A	G	ENSBTAT00000021766, ENSBTAG00000048157	L->P	missense
chr1	45618948	G	T	ENSBTAT00000021766, ENSBTAG00000048157	A->E	missense
chr1	45619644	A	C	ENSBTAT00000021766, ENSBTAG00000048157	A->A	synonymous
chr1	45620361	C	T	ENSBTAT00000021766, ENSBTAG00000048157	V->I	missense
chr1	45633462	T	A	ENSBTAT00000021766, ENSBTAG00000048157	E->V	missense
chr1	45636985	T	C	ENSBTAT00000021766, ENSBTAG00000048157	K->E	missense
chr1	45637060	T	C	ENSBTAT00000021766, ENSBTAG00000048157	T->A	missense
chr1	45639267	G	C	ENSBTAT00000021766, ENSBTAG00000048157	T->S	missense
chr1	45639278	G	T	ENSBTAT00000021766, ENSBTAG00000048157	P->P	synonymous
chr1	45640316	T	C	ENSBTAT00000021766, ENSBTAG00000048157	L->L	synonymous
chr1	45668461	T	C	ENSBTAT00000057490, ENSBTAG00000026836	I->V	missense
chr1	45687560	G	A	ENSBTAT00000057490, ENSBTAG00000026836	Y->Y	synonymous
chr1	46091270	G	C	ENSBTAT00000020801, ENSBTAG00000015662	L->L	synonymous
chr1	46094151	G	C	ENSBTAT00000020801, ENSBTAG00000015662	I->M	missense
chr1	46102678	A	G	ENSBTAT00000020801, ENSBTAG00000015662	S->S	synonymous
chr1	46103547	A	C	ENSBTAT00000020801, ENSBTAG00000015662	S->A	missense
chr1	46128315	C	T	ENSBTAT00000020801, ENSBTAG00000015662	D->N	missense
chr1	46154658	C	G	ENSBTAT00000020801, ENSBTAG00000015662	E->Q	missense
chr1	46196373	A	G	ENSBTAT00000022522, ENSBTAG00000016932	D->D	synonymous
chr1	46196373	A	G	NM_001101888, SENP7	D->D	synonymous
chr1	46201939	G	T	ENSBTAT00000022522, ENSBTAG00000016932	T->N	missense
chr1	46201939	G	T	NM_001101888, SENP7	T->N	missense
chr1	46215247	A	G	ENSBTAT00000022522, ENSBTAG00000016932	P->P	synonymous
chr1	46215247	A	G	NM_001101888, SENP7	P->P	synonymous
chr1	46215277	C	A	ENSBTAT00000022522, ENSBTAG00000016932	Q->H	missense
chr1	46215277	C	A	NM_001101888, SENP7	Q->H	missense
chr1	46217357	C	T	ENSBTAT00000022522, ENSBTAG00000016932	G->E	missense
chr1	46217357	C	T	NM_001101888, SENP7	G->E	missense
chr1	46217397	G	A	ENSBTAT00000022522, ENSBTAG00000016932	Q->*	stop-gain
chr1	46217397	G	A	NM_001101888, SENP7	Q->*	stop-gain
chr1	46262367	C	T	ENSBTAT00000022522, ENSBTAG00000016932	T->T	synonymous
chr1	46262367	C	T	NM_001101888, SENP7	T->T	synonymous
chr1	46262388	C	A	ENSBTAT00000022522, ENSBTAG00000016932	M->I	missense
chr1	46262388	C	A	NM_001101888, SENP7	M->I	missense
chr1	46290187	C	T	ENSBTAT00000022522, ENSBTAG00000016932	T->T	synonymous
chr1	46290187	C	T	NM_001101888, SENP7	T->T	synonymous
chr1	46323016	A	G	ENSBTAT00000054699, ENSBTAG00000018731	H->R	missense
chr1	46323197	G	T	ENSBTAT00000054699, ENSBTAG00000018731	Q->H	missense
chr1	46339456	G	T	ENSBTAT00000033093, ENSBTAG00000024027	N->K	missense
chr1	46339456	G	T	NM_001046323, TRMT10C	N->K	missense
chr1	46339510	G	C	ENSBTAT00000033093, ENSBTAG00000024027	S->R	missense
chr1	46339510	G	C	NM_001046323, TRMT10C	S->R	missense
chr1	46340367	C	G	ENSBTAT00000033093, ENSBTAG00000024027	A->P	missense
chr1	46340367	C	G	NM_001046323, TRMT10C	A->P	missense
chr1	46360944	C	T	ENSBTAT00000017901, ENSBTAG00000015069	R->C	missense
chr1	46360944	C	T	NM_001038205, PCNP	R->C	missense
chr1	46368881	C	G	ENSBTAT00000017901, ENSBTAG00000015069	V->V	synonymous
chr1	46368881	C	G	NM_001038205, PCNP	V->V	synonymous
chr1	46387537	C	T	ENSBTAT00000017903, ENSBTAG00000013460	K->K	synonymous
chr1	46387537	C	T	NM_001205556, ZBTB11	K->K	synonymous
chr1	46392723	T	C	ENSBTAT00000017903, ENSBTAG00000013460	K->R	missense
chr1	46392723	T	C	NM_001205556, ZBTB11	K->R	missense
chr1	46393008	A	G	ENSBTAT00000017903, ENSBTAG00000013460	L->P	missense
chr1	46393008	A	G	NM_001205556, ZBTB11	L->P	missense
chr1	46411769	G	A	ENSBTAT00000017903, ENSBTAG00000013460	H->H	synonymous
chr1	46411769	G	A	NM_001205556, ZBTB11	H->H	synonymous
chr1	46411802	G	T	ENSBTAT00000017903, ENSBTAG00000013460	G->G	synonymous
chr1	46411802	G	T	NM_001205556, ZBTB11	G->G	synonymous
chr1	46417106	C	T	ENSBTAT00000017905, ENSBTAG00000013461	E->K	missense
chr1	46417106	C	T	NM_174455, RPL24	E->K	missense
chr1	46445260	C	A	ENSBTAT00000017907, ENSBTAG00000013464	P->Q	missense
chr1	46445260	C	A	NM_001192424, CEP97	P->Q	missense
chr1	46451529	G	A	ENSBTAT00000017907, ENSBTAG00000013464	V->I	missense
chr1	46451529	G	A	NM_001192424, CEP97	V->I	missense
chr1	46451543	C	T	ENSBTAT00000017907, ENSBTAG00000013464	S->S	synonymous
chr1	46451543	C	T	NM_001192424, CEP97	S->S	synonymous
chr1	46498100	A	G	ENSBTAT00000017908, ENSBTAG00000013465	E->G	missense
chr1	46498100	A	G	NM_001081529, NXPE3	E->G	missense
chr1	46498130	A	G	ENSBTAT00000017908, ENSBTAG00000013465	K->R	missense
chr1	46498130	A	G	NM_001081529, NXPE3	K->R	missense
chr1	46518456	T	C	ENSBTAT00000017908, ENSBTAG00000013465	R->R	synonymous
chr1	46518456	T	C	NM_001081529, NXPE3	R->R	synonymous
chr1	46518592	C	T	ENSBTAT00000017908, ENSBTAG00000013465	R->W	missense
chr1	46518592	C	T	NM_001081529, NXPE3	R->W	missense
chr1	46518720	C	G	ENSBTAT00000017908, ENSBTAG00000013465	S->S	synonymous
chr1	46518720	C	G	NM_001081529, NXPE3	S->S	synonymous
chr1	46543504	T	C	ENSBTAT00000014591, ENSBTAG00000010987	I->I	synonymous
chr1	46543504	T	C	ENSBTAT00000047710, ENSBTAG00000010987	I->I	synonymous
chr1	46543504	T	C	NM_174726, NFKBIZ	I->I	synonymous
chr1	46543661	T	C	ENSBTAT00000014591, ENSBTAG00000010987	S->P	missense
chr1	46543661	T	C	ENSBTAT00000047710, ENSBTAG00000010987	S->P	missense
chr1	46543661	T	C	NM_174726, NFKBIZ	S->P	missense
chr1	46546741	G	T	ENSBTAT00000014591, ENSBTAG00000010987	V->L	missense
chr1	46546741	G	T	ENSBTAT00000047710, ENSBTAG00000010987	V->L	missense
chr1	46546741	G	T	NM_174726, NFKBIZ	V->L	missense
chr1	46546949	C	T	ENSBTAT00000014591, ENSBTAG00000010987	P->S	missense
chr1	46546949	C	T	ENSBTAT00000047710, ENSBTAG00000010987	P->S	missense
chr1	46546949	C	T	NM_174726, NFKBIZ	P->S	missense
chr1	46546952	G	T	ENSBTAT00000014591, ENSBTAG00000010987	A->S	missense
chr1	46546952	G	T	ENSBTAT00000047710, ENSBTAG00000010987	A->S	missense
chr1	46546952	G	T	NM_174726, NFKBIZ	A->S	missense
chr1	46547249	G	A	ENSBTAT00000014591, ENSBTAG00000010987	V->M	missense
chr1	46547249	G	A	ENSBTAT00000047710, ENSBTAG00000010987	V->M	missense
chr1	46547249	G	A	NM_174726, NFKBIZ	V->M	missense
chr1	46548587	G	A	ENSBTAT00000014591, ENSBTAG00000010987	A->A	synonymous
chr1	46548587	G	A	ENSBTAT00000047710, ENSBTAG00000010987	A->A	synonymous
chr1	46548587	G	A	NM_174726, NFKBIZ	A->A	synonymous
chr1	46549128	G	C	ENSBTAT00000014591, ENSBTAG00000010987	V->V	synonymous
chr1	46549128	G	C	ENSBTAT00000047710, ENSBTAG00000010987	V->V	synonymous
chr1	46549128	G	C	NM_174726, NFKBIZ	V->V	synonymous
chr1	47006973	A	T	ENSBTAT00000025650, ENSBTAG00000024806	K->*	stop-gain
chr1	47062680	G	A	ENSBTAT00000065922, ENSBTAG00000047093	R->C	missense
chr1	47062737	G	A	ENSBTAT00000065922, ENSBTAG00000047093	R->W	missense
chr1	47062749	A	G	ENSBTAT00000065922, ENSBTAG00000047093	C->R	missense
chr1	47062759	G	A	ENSBTAT00000065922, ENSBTAG00000047093	T->T	synonymous
chr1	47062806	G	C	ENSBTAT00000065922, ENSBTAG00000047093	L->V	missense
chr1	47063114	G	A	ENSBTAT00000065922, ENSBTAG00000047093	A->V	missense
chr1	47063147	A	G	ENSBTAT00000065922, ENSBTAG00000047093	L->S	missense
chr1	47063164	G	C	ENSBTAT00000065922, ENSBTAG00000047093	N->K	missense
chr1	47063196	C	T	ENSBTAT00000065922, ENSBTAG00000047093	G->S	missense
chr1	47063223	G	T	ENSBTAT00000065922, ENSBTAG00000047093	P->T	missense
chr1	47063252	C	T	ENSBTAT00000065922, ENSBTAG00000047093	R->H	missense
chr1	47063366	C	T	ENSBTAT00000065922, ENSBTAG00000047093	S->S	synonymous
chr1	47063492	A	G	ENSBTAT00000065922, ENSBTAG00000047093	V->A	missense
chr1	47063613	T	C	ENSBTAT00000065922, ENSBTAG00000047093	Q->Q	synonymous
chr1	47063694	A	T	ENSBTAT00000065922, ENSBTAG00000047093	P->P	synonymous
chr1	47063740	C	T	ENSBTAT00000065922, ENSBTAG00000047093	R->H	missense
chr1	47063748	C	A	ENSBTAT00000065922, ENSBTAG00000047093	E->D	missense
chr1	47063766	C	T	ENSBTAT00000065922, ENSBTAG00000047093	Q->Q	synonymous
chr1	47277748	C	T	ENSBTAT00000004776, ENSBTAG00000003666	S->S	synonymous
chr1	47277832	T	C	ENSBTAT00000004776, ENSBTAG00000003666	P->P	synonymous
chr1	47291516	G	A	ENSBTAT00000004776, ENSBTAG00000003666	R->Q	missense
chr1	47304259	C	T	ENSBTAT00000004776, ENSBTAG00000003666	S->L	missense
chr1	50503111	G	A	ENSBTAT00000000097, ENSBTAG00000000088	S->S	synonymous
chr1	50503111	G	A	NM_174238, ALCAM	S->S	synonymous
chr1	50504868	A	G	ENSBTAT00000000097, ENSBTAG00000000088	N->D	missense
chr1	50504868	A	G	NM_174238, ALCAM	N->D	missense
chr1	50504904	C	G	ENSBTAT00000000097, ENSBTAG00000000088	P->A	missense
chr1	50504904	C	G	NM_174238, ALCAM	P->A	missense
chr1	50504914	G	A	ENSBTAT00000000097, ENSBTAG00000000088	G->E	missense
chr1	50504914	G	A	NM_174238, ALCAM	G->E	missense
chr1	50510620	C	A	ENSBTAT00000000097, ENSBTAG00000000088	P->H	missense
chr1	50510620	C	A	NM_174238, ALCAM	P->H	missense
chr1	50531458	T	C	ENSBTAT00000000097, ENSBTAG00000000088	S->S	synonymous
chr1	50531458	T	C	NM_174238, ALCAM	S->S	synonymous
chr1	50534503	C	A	ENSBTAT00000000097, ENSBTAG00000000088	A->D	missense
chr1	50534503	C	A	NM_174238, ALCAM	A->D	missense
chr1	50682456	C	T	ENSBTAT00000017358, ENSBTAG00000013057	G->S	missense
chr1	50682456	C	T	ENSBTAT00000062945, ENSBTAG00000013057	G->S	missense
chr1	50682456	C	T	NM_001205923, CBLB	G->S	missense
chr1	50686623	C	T	ENSBTAT00000017358, ENSBTAG00000013057	D->N	missense
chr1	50686623	C	T	ENSBTAT00000062945, ENSBTAG00000013057	D->N	missense
chr1	50686623	C	T	NM_001205923, CBLB	D->N	missense
chr1	50712565	C	T	ENSBTAT00000017358, ENSBTAG00000013057	G->S	missense
chr1	50712565	C	T	ENSBTAT00000062945, ENSBTAG00000013057	G->S	missense
chr1	50712565	C	T	NM_001205923, CBLB	G->S	missense
chr1	50732049	A	G	ENSBTAT00000017358, ENSBTAG00000013057	D->D	synonymous
chr1	50732049	A	G	ENSBTAT00000062945, ENSBTAG00000013057	D->D	synonymous
chr1	50732049	A	G	NM_001205923, CBLB	D->D	synonymous
chr1	51022897	C	T	ENSBTAT00000007124, ENSBTAG00000005414	P->L	missense
chr1	51022897	C	T	NM_001113231, TMSB4	P->L	missense
chr1	52364059	A	G	ENSBTAT00000063186, ENSBTAG00000046313	E->E	synonymous
chr1	52364059	A	G	NM_001105490, CCDC54	E->E	synonymous
chr1	52810082	G	A	ENSBTAT00000009058, ENSBTAG00000006893	G->R	missense
chr1	52810082	G	A	NM_001192759, BBX	G->R	missense
chr1	52810720	T	A	ENSBTAT00000009058, ENSBTAG00000006893	I->I	synonymous
chr1	52810720	T	A	NM_001192759, BBX	I->I	synonymous
chr1	52810797	C	T	ENSBTAT00000009058, ENSBTAG00000006893	T->I	missense
chr1	52810797	C	T	NM_001192759, BBX	T->I	missense
chr1	53116710	T	C	ENSBTAT00000004664, ENSBTAG00000003585	I->V	missense
chr1	53116710	T	C	ENSBTAT00000055450, ENSBTAG00000003585	I->V	missense
chr1	53116710	T	C	NM_174708, CD47	I->V	missense
chr1	53156188	C	T	ENSBTAT00000004664, ENSBTAG00000003585	S->N	missense
chr1	53156188	C	T	ENSBTAT00000055450, ENSBTAG00000003585	S->N	missense
chr1	53156188	C	T	NM_174708, CD47	S->N	missense
chr1	53327346	C	T	ENSBTAT00000007606, ENSBTAG00000005787	R->H	missense
chr1	53327346	C	T	NM_001105403, IFT57	R->H	missense
chr1	53343914	C	A	ENSBTAT00000007606, ENSBTAG00000005787	R->L	missense
chr1	53343914	C	A	NM_001105403, IFT57	R->L	missense
chr1	53363929	T	C	ENSBTAT00000007606, ENSBTAG00000005787	V->V	synonymous
chr1	53363929	T	C	NM_001105403, IFT57	V->V	synonymous
chr1	53368660	T	C	ENSBTAT00000007606, ENSBTAG00000005787	N->D	missense
chr1	53368660	T	C	NM_001105403, IFT57	N->D	missense
chr1	53368760	C	G	ENSBTAT00000007606, ENSBTAG00000005787	A->A	synonymous
chr1	53368760	C	G	NM_001105403, IFT57	A->A	synonymous
chr1	53512540	G	A	ENSBTAT00000024479, ENSBTAG00000018397	V->I	missense
chr1	53520449	C	A	ENSBTAT00000024479, ENSBTAG00000018397	H->N	missense
chr1	53520607	T	C	ENSBTAT00000024479, ENSBTAG00000018397	N->N	synonymous
chr1	53520749	C	G	ENSBTAT00000024479, ENSBTAG00000018397	L->V	missense
chr1	53520943	G	A	ENSBTAT00000024479, ENSBTAG00000018397	A->T	missense
chr1	53538525	G	T	ENSBTAT00000032372, ENSBTAG00000018399	L->I	missense
chr1	53547550	A	G	ENSBTAT00000032372, ENSBTAG00000018399	S->S	synonymous
chr1	53548110	G	A	ENSBTAT00000032372, ENSBTAG00000018399	S->L	missense
chr1	53548131	C	T	ENSBTAT00000032372, ENSBTAG00000018399	C->Y	missense
chr1	53554768	C	T	ENSBTAT00000032372, ENSBTAG00000018399	A->A	synonymous
chr1	53554788	C	T	ENSBTAT00000032372, ENSBTAG00000018399	E->K	missense
chr1	53560330	C	T	ENSBTAT00000032372, ENSBTAG00000018399	Q->Q	synonymous
chr1	53579772	C	T	ENSBTAT00000032372, ENSBTAG00000018399	R->Q	missense
chr1	53579789	C	T	ENSBTAT00000032372, ENSBTAG00000018399	A->A	synonymous
chr1	53590190	A	G	ENSBTAT00000032372, ENSBTAG00000018399	M->T	missense
chr1	53590416	T	C	ENSBTAT00000032372, ENSBTAG00000018399	I->V	missense
chr1	53590488	G	A	ENSBTAT00000032372, ENSBTAG00000018399	L->F	missense
chr1	53596373	G	C	ENSBTAT00000032372, ENSBTAG00000018399	D->E	missense
chr1	53598190	C	T	ENSBTAT00000032372, ENSBTAG00000018399	T->T	synonymous
chr1	53598208	T	C	ENSBTAT00000032372, ENSBTAG00000018399	L->L	synonymous
chr1	53598336	G	T	ENSBTAT00000032372, ENSBTAG00000018399	L->M	missense
chr1	53599550	C	T	ENSBTAT00000032372, ENSBTAG00000018399	V->I	missense
chr1	53610493	C	T	ENSBTAT00000032372, ENSBTAG00000018399	L->L	synonymous
chr1	53612697	C	A	ENSBTAT00000032372, ENSBTAG00000018399	G->V	missense
chr1	53629689	T	C	ENSBTAT00000032372, ENSBTAG00000018399	Q->Q	synonymous
chr1	53636458	T	C	ENSBTAT00000032372, ENSBTAG00000018399	I->V	missense
chr1	53636475	C	T	ENSBTAT00000032372, ENSBTAG00000018399	G->D	missense
chr1	53654820	C	T	ENSBTAT00000032372, ENSBTAG00000018399	S->N	missense
chr1	53687467	A	G	ENSBTAT00000032372, ENSBTAG00000018399	A->A	synonymous
chr1	53727643	T	C	ENSBTAT00000022784, ENSBTAG00000017140	Q->Q	synonymous
chr1	53735169	G	T	ENSBTAT00000022784, ENSBTAG00000017140	T->K	missense
chr1	53735169	G	T	NM_001103284, KIAA1524	T->K	missense
chr1	53753687	C	T	ENSBTAT00000022784, ENSBTAG00000017140	Q->Q	synonymous
chr1	53753687	C	T	NM_001103284, KIAA1524	Q->Q	synonymous
chr1	53855896	A	G	ENSBTAT00000008099, ENSBTAG00000006158	E->G	missense
chr1	53855896	A	G	NM_001076092, DZIP3	E->G	missense
chr1	53856167	C	G	ENSBTAT00000008099, ENSBTAG00000006158	I->M	missense
chr1	53856167	C	G	NM_001076092, DZIP3	I->M	missense
chr1	53868125	A	G	ENSBTAT00000008099, ENSBTAG00000006158	I->M	missense
chr1	53868125	A	G	NM_001076092, DZIP3	I->M	missense
chr1	54023030	C	T	ENSBTAT00000034536, ENSBTAG00000000183	S->S	synonymous
chr1	54023030	C	T	NM_001163943, TRAT1	S->S	synonymous
chr1	54032498	C	T	ENSBTAT00000034536, ENSBTAG00000000183	A->V	missense
chr1	54032498	C	T	NM_001163943, TRAT1	A->V	missense
chr1	54034661	T	C	ENSBTAT00000034536, ENSBTAG00000000183	V->A	missense
chr1	54034661	T	C	NM_001163943, TRAT1	V->A	missense
chr1	54041195	G	A	ENSBTAT00000034536, ENSBTAG00000000183	R->R	synonymous
chr1	54041195	G	A	NM_001163943, TRAT1	R->R	synonymous
chr1	54041205	A	T	ENSBTAT00000034536, ENSBTAG00000000183	T->S	missense
chr1	54041205	A	T	NM_001163943, TRAT1	T->S	missense
chr1	54041300	C	A	ENSBTAT00000034536, ENSBTAG00000000183	S->R	missense
chr1	54041300	C	A	NM_001163943, TRAT1	S->R	missense
chr1	54041300	C	T	ENSBTAT00000034536, ENSBTAG00000000183	S->S	synonymous
chr1	54041300	C	T	NM_001163943, TRAT1	S->S	synonymous
chr1	54041404	G	A	ENSBTAT00000034536, ENSBTAG00000000183	*->*	synonymous
chr1	54041404	G	A	NM_001163943, TRAT1	*->*	synonymous
chr1	54143301	G	C	ENSBTAT00000052196, ENSBTAG00000015475	Q->E	missense
chr1	54143398	A	G	ENSBTAT00000052196, ENSBTAG00000015475	N->N	synonymous
chr1	54152340	T	C	ENSBTAT00000052196, ENSBTAG00000015475	E->E	synonymous
chr1	54153852	A	T	ENSBTAT00000052196, ENSBTAG00000015475	L->L	synonymous
chr1	54153870	C	T	ENSBTAT00000052196, ENSBTAG00000015475	Q->Q	synonymous
chr1	54190759	A	G	ENSBTAT00000052196, ENSBTAG00000015475	M->T	missense
chr1	54190839	C	T	ENSBTAT00000052196, ENSBTAG00000015475	A->A	synonymous
chr1	54190912	C	A	ENSBTAT00000052196, ENSBTAG00000015475	W->L	missense
chr1	54206653	T	C	ENSBTAT00000052196, ENSBTAG00000015475	Q->Q	synonymous
chr1	54206688	T	C	ENSBTAT00000052196, ENSBTAG00000015475	N->D	missense
chr1	54206738	T	C	ENSBTAT00000052196, ENSBTAG00000015475	H->R	missense
chr1	54296928	A	G	ENSBTAT00000052196, ENSBTAG00000015475	L->L	synonymous
chr1	54481566	A	G	ENSBTAT00000027264, ENSBTAG00000020460	C->R	missense
chr1	54481566	A	G	ENSBTAT00000057339, ENSBTAG00000020460	C->R	missense
chr1	54481566	A	G	NM_001206470, DPPA2	C->R	missense
chr1	54487469	G	T	ENSBTAT00000027264, ENSBTAG00000020460	S->Y	missense
chr1	54487469	G	T	ENSBTAT00000057339, ENSBTAG00000020460	S->Y	missense
chr1	54487469	G	T	NM_001206470, DPPA2	S->Y	missense
chr1	54490113	G	T	ENSBTAT00000027264, ENSBTAG00000020460	H->N	missense
chr1	54490113	G	T	ENSBTAT00000057339, ENSBTAG00000020460	H->N	missense
chr1	54490113	G	T	NM_001206470, DPPA2	H->N	missense
chr1	54514541	C	T	ENSBTAT00000052895, ENSBTAG00000038103	S->S	synonymous
chr1	54514541	C	T	ENSBTAT00000055391, ENSBTAG00000038103	S->S	synonymous
chr1	54514541	C	T	ENSBTAT00000056336, ENSBTAG00000038103	S->S	synonymous
chr1	54514541	C	T	NM_001206481, DPPA4	S->S	synonymous
chr1	54514592	G	A	ENSBTAT00000052895, ENSBTAG00000038103	A->A	synonymous
chr1	54514592	G	A	ENSBTAT00000055391, ENSBTAG00000038103	A->A	synonymous
chr1	54514592	G	A	ENSBTAT00000056336, ENSBTAG00000038103	A->A	synonymous
chr1	54514592	G	A	NM_001206481, DPPA4	A->A	synonymous
chr1	54514670	C	G	ENSBTAT00000052895, ENSBTAG00000038103	P->P	synonymous
chr1	54514670	C	G	ENSBTAT00000055391, ENSBTAG00000038103	P->P	synonymous
chr1	54514670	C	G	ENSBTAT00000056336, ENSBTAG00000038103	P->P	synonymous
chr1	54514670	C	G	NM_001206481, DPPA4	P->P	synonymous
chr1	54514677	C	G	ENSBTAT00000052895, ENSBTAG00000038103	R->P	missense
chr1	54514677	C	G	ENSBTAT00000055391, ENSBTAG00000038103	R->P	missense
chr1	54514677	C	G	ENSBTAT00000056336, ENSBTAG00000038103	R->P	missense
chr1	54514677	C	G	NM_001206481, DPPA4	R->P	missense
chr1	54514763	G	C	ENSBTAT00000052895, ENSBTAG00000038103	S->S	synonymous
chr1	54514763	G	C	ENSBTAT00000055391, ENSBTAG00000038103	S->S	synonymous
chr1	54514763	G	C	ENSBTAT00000056336, ENSBTAG00000038103	S->S	synonymous
chr1	54514763	G	C	NM_001206481, DPPA4	S->S	synonymous
chr1	54515140	T	C	ENSBTAT00000052895, ENSBTAG00000038103	L->L	synonymous
chr1	54515140	T	C	ENSBTAT00000055391, ENSBTAG00000038103	L->L	synonymous
chr1	54515140	T	C	ENSBTAT00000056336, ENSBTAG00000038103	L->L	synonymous
chr1	54515140	T	C	NM_001206481, DPPA4	L->L	synonymous
chr1	54515187	G	T	ENSBTAT00000052895, ENSBTAG00000038103	P->T	missense
chr1	54515187	G	T	ENSBTAT00000055391, ENSBTAG00000038103	P->T	missense
chr1	54515187	G	T	ENSBTAT00000056336, ENSBTAG00000038103	P->T	missense
chr1	54515187	G	T	NM_001206481, DPPA4	P->T	missense
chr1	54515229	C	G	ENSBTAT00000052895, ENSBTAG00000038103	G->R	missense
chr1	54515229	C	G	ENSBTAT00000056336, ENSBTAG00000038103	G->R	missense
chr1	54515229	C	G	NM_001206481, DPPA4	G->R	missense
chr1	54516361	T	C	ENSBTAT00000052895, ENSBTAG00000038103	G->G	synonymous
chr1	54516361	T	C	ENSBTAT00000056336, ENSBTAG00000038103	G->G	synonymous
chr1	54516361	T	C	NM_001206481, DPPA4	G->G	synonymous
chr1	54516476	T	C	ENSBTAT00000056336, ENSBTAG00000038103	N->S	missense
chr1	54516476	T	C	NM_001206481, DPPA4	N->S	missense
chr1	54516555	C	G	ENSBTAT00000056336, ENSBTAG00000038103	R->P	missense
chr1	54649772	G	A	ENSBTAT00000020266, ENSBTAG00000022275	P->L	missense
chr1	55802262	A	C	ENSBTAT00000066238, ENSBTAG00000045855	Y->D	missense
chr1	56028500	T	G	ENSBTAT00000065920, ENSBTAG00000045820	L->F	missense
chr1	56028558	C	T	ENSBTAT00000065920, ENSBTAG00000045820	S->N	missense
chr1	56165086	G	A	ENSBTAT00000056200, ENSBTAG00000038651	S->L	missense
chr1	56165248	C	T	ENSBTAT00000056200, ENSBTAG00000038651	R->Q	missense
chr1	56165802	C	T	ENSBTAT00000056200, ENSBTAG00000038651	G->D	missense
chr1	56165861	T	C	ENSBTAT00000056200, ENSBTAG00000038651	V->V	synonymous
chr1	56165867	A	C	ENSBTAT00000056200, ENSBTAG00000038651	N->K	missense
chr1	56360886	G	A	ENSBTAT00000032332, ENSBTAG00000013769	V->I	missense
chr1	56377774	C	T	ENSBTAT00000032332, ENSBTAG00000013769	P->P	synonymous
chr1	56378233	G	A	ENSBTAT00000032332, ENSBTAG00000013769	Q->Q	synonymous
chr1	56724630	C	T	ENSBTAT00000019209, ENSBTAG00000014441	A->V	missense
chr1	56724630	C	T	NM_001035072, CD96	A->V	missense
chr1	56724792	G	C	ENSBTAT00000019209, ENSBTAG00000014441	S->T	missense
chr1	56724792	G	C	NM_001035072, CD96	S->T	missense
chr1	56724937	C	T	ENSBTAT00000019209, ENSBTAG00000014441	I->I	synonymous
chr1	56724937	C	T	NM_001035072, CD96	I->I	synonymous
chr1	56736565	G	A	ENSBTAT00000019209, ENSBTAG00000014441	E->E	synonymous
chr1	56736565	G	A	NM_001035072, CD96	E->E	synonymous
chr1	56752926	T	G	ENSBTAT00000019209, ENSBTAG00000014441	S->A	missense
chr1	56752926	T	G	NM_001035072, CD96	S->A	missense
chr1	56759677	G	A	ENSBTAT00000063209, ENSBTAG00000046637	G->G	synonymous
chr1	56759869	C	G	ENSBTAT00000063209, ENSBTAG00000046637	G->G	synonymous
chr1	56759893	A	G	ENSBTAT00000063209, ENSBTAG00000046637	D->D	synonymous
chr1	56764749	G	T	ENSBTAT00000019209, ENSBTAG00000014441	E->*	stop-gain
chr1	56764749	G	T	NM_001035072, CD96	E->*	stop-gain
chr1	56766766	T	C	ENSBTAT00000019209, ENSBTAG00000014441	V->A	missense
chr1	56766766	T	C	NM_001035072, CD96	V->A	missense
chr1	56766827	G	A	ENSBTAT00000019209, ENSBTAG00000014441	P->P	synonymous
chr1	56766827	G	A	NM_001035072, CD96	P->P	synonymous
chr1	56801016	C	T	ENSBTAT00000019209, ENSBTAG00000014441	P->L	missense
chr1	56801016	C	T	NM_001035072, CD96	P->L	missense
chr1	56801613	C	T	ENSBTAT00000019209, ENSBTAG00000014441	D->D	synonymous
chr1	56801613	C	T	NM_001035072, CD96	D->D	synonymous
chr1	56812508	G	A	ENSBTAT00000019209, ENSBTAG00000014441	T->T	synonymous
chr1	56812508	G	A	NM_001035072, CD96	T->T	synonymous
chr1	56816605	C	T	ENSBTAT00000019209, ENSBTAG00000014441	L->L	synonymous
chr1	56816605	C	T	NM_001035072, CD96	L->L	synonymous
chr1	56816618	G	A	ENSBTAT00000019209, ENSBTAG00000014441	V->I	missense
chr1	56816618	G	A	NM_001035072, CD96	V->I	missense
chr1	56844529	A	G	ENSBTAT00000016779, ENSBTAG00000012646	K->K	synonymous
chr1	56844568	T	C	ENSBTAT00000016779, ENSBTAG00000012646	L->L	synonymous
chr1	56878604	C	G	ENSBTAT00000016779, ENSBTAG00000012646	S->S	synonymous
chr1	56878745	C	T	ENSBTAT00000016779, ENSBTAG00000012646	H->H	synonymous
chr1	56878776	C	A	ENSBTAT00000016779, ENSBTAG00000012646	L->M	missense
chr1	56878942	C	A	ENSBTAT00000016779, ENSBTAG00000012646	T->K	missense
chr1	56878948	A	G	ENSBTAT00000016779, ENSBTAG00000012646	Q->R	missense
chr1	56878969	A	G	ENSBTAT00000016779, ENSBTAG00000012646	Y->C	missense
chr1	56894431	C	T	ENSBTAT00000016779, ENSBTAG00000012646	L->L	synonymous
chr1	56894465	C	T	ENSBTAT00000016779, ENSBTAG00000012646	A->V	missense
chr1	57055379	G	A	ENSBTAT00000001599, ENSBTAG00000001209	L->L	synonymous
chr1	57055379	G	A	NM_001206308, PHLDB2	L->L	synonymous
chr1	57055677	T	C	ENSBTAT00000001599, ENSBTAG00000001209	L->L	synonymous
chr1	57055677	T	C	NM_001206308, PHLDB2	L->L	synonymous
chr1	57055755	C	T	ENSBTAT00000001599, ENSBTAG00000001209	H->Y	missense
chr1	57055755	C	T	NM_001206308, PHLDB2	H->Y	missense
chr1	57055801	G	A	ENSBTAT00000001599, ENSBTAG00000001209	S->N	missense
chr1	57055801	G	A	NM_001206308, PHLDB2	S->N	missense
chr1	57055845	G	C	ENSBTAT00000001599, ENSBTAG00000001209	A->P	missense
chr1	57055845	G	C	NM_001206308, PHLDB2	A->P	missense
chr1	57078433	C	T	ENSBTAT00000001599, ENSBTAG00000001209	S->S	synonymous
chr1	57078433	C	T	NM_001206308, PHLDB2	S->S	synonymous
chr1	57109151	A	G	ENSBTAT00000001599, ENSBTAG00000001209	H->R	missense
chr1	57109151	A	G	NM_001206308, PHLDB2	H->R	missense
chr1	57140593	C	T	ENSBTAT00000001599, ENSBTAG00000001209	T->T	synonymous
chr1	57140593	C	T	NM_001206308, PHLDB2	T->T	synonymous
chr1	57145517	T	C	ENSBTAT00000001599, ENSBTAG00000001209	V->V	synonymous
chr1	57145517	T	C	NM_001206308, PHLDB2	V->V	synonymous
chr1	57145520	C	A	ENSBTAT00000001599, ENSBTAG00000001209	I->I	synonymous
chr1	57145520	C	A	NM_001206308, PHLDB2	I->I	synonymous
chr1	57156354	C	T	ENSBTAT00000006038, ENSBTAG00000004601	G->G	synonymous
chr1	57156354	C	T	NM_001015606, ABHD10	G->G	synonymous
chr1	57156379	C	T	ENSBTAT00000006038, ENSBTAG00000004601	P->S	missense
chr1	57156379	C	T	NM_001015606, ABHD10	P->S	missense
chr1	57168731	T	C	ENSBTAT00000006038, ENSBTAG00000004601	V->V	synonymous
chr1	57168731	T	C	NM_001015606, ABHD10	V->V	synonymous
chr1	57168755	T	C	ENSBTAT00000006038, ENSBTAG00000004601	C->C	synonymous
chr1	57168755	T	C	NM_001015606, ABHD10	C->C	synonymous
chr1	57180115	A	G	ENSBTAT00000006033, ENSBTAG00000004599	E->E	synonymous
chr1	57180115	A	G	NM_001034499, TAGLN3	E->E	synonymous
chr1	57190572	A	G	ENSBTAT00000006033, ENSBTAG00000004599	A->A	synonymous
chr1	57190572	A	G	NM_001034499, TAGLN3	A->A	synonymous
chr1	57192095	C	T	ENSBTAT00000006033, ENSBTAG00000004599	P->P	synonymous
chr1	57192095	C	T	NM_001034499, TAGLN3	P->P	synonymous
chr1	57216785	A	G	ENSBTAT00000020053, ENSBTAG00000015065	T->A	missense
chr1	57228030	A	C	ENSBTAT00000020053, ENSBTAG00000015065	R->R	synonymous
chr1	57228030	A	C	NM_001205892, TMPRSS7	R->R	synonymous
chr1	57232408	T	G	ENSBTAT00000020053, ENSBTAG00000015065	S->A	missense
chr1	57232408	T	G	NM_001205892, TMPRSS7	S->A	missense
chr1	57233712	C	G	ENSBTAT00000020053, ENSBTAG00000015065	V->V	synonymous
chr1	57233712	C	G	NM_001205892, TMPRSS7	V->V	synonymous
chr1	57236270	C	T	ENSBTAT00000020053, ENSBTAG00000015065	T->I	missense
chr1	57236270	C	T	NM_001205892, TMPRSS7	T->I	missense
chr1	57237933	T	C	ENSBTAT00000020053, ENSBTAG00000015065	W->R	missense
chr1	57237933	T	C	NM_001205892, TMPRSS7	W->R	missense
chr1	57248627	C	G	ENSBTAT00000020053, ENSBTAG00000015065	D->E	missense
chr1	57248627	C	G	NM_001205892, TMPRSS7	D->E	missense
chr1	57255084	C	T	ENSBTAT00000020053, ENSBTAG00000015065	S->S	synonymous
chr1	57255084	C	T	NM_001205892, TMPRSS7	S->S	synonymous
chr1	57257637	C	T	ENSBTAT00000020053, ENSBTAG00000015065	F->F	synonymous
chr1	57257637	C	T	NM_001205892, TMPRSS7	F->F	synonymous
chr1	57257643	G	A	ENSBTAT00000020053, ENSBTAG00000015065	Q->Q	synonymous
chr1	57257643	G	A	NM_001205892, TMPRSS7	Q->Q	synonymous
chr1	57257664	C	T	ENSBTAT00000020053, ENSBTAG00000015065	D->D	synonymous
chr1	57257664	C	T	NM_001205892, TMPRSS7	D->D	synonymous
chr1	57257711	G	A	ENSBTAT00000020053, ENSBTAG00000015065	R->H	missense
chr1	57257711	G	A	NM_001205892, TMPRSS7	R->H	missense
chr1	57260111	T	C	ENSBTAT00000020053, ENSBTAG00000015065	F->S	missense
chr1	57260111	T	C	NM_001205892, TMPRSS7	F->S	missense
chr1	57264591	G	A	ENSBTAT00000020053, ENSBTAG00000015065	S->S	synonymous
chr1	57264591	G	A	NM_001205892, TMPRSS7	S->S	synonymous
chr1	57264624	G	A	ENSBTAT00000020053, ENSBTAG00000015065	K->K	synonymous
chr1	57264624	G	A	NM_001205892, TMPRSS7	K->K	synonymous
chr1	57268683	G	C	ENSBTAT00000020053, ENSBTAG00000015065	K->N	missense
chr1	57268683	G	C	NM_001205892, TMPRSS7	K->N	missense
chr1	57279705	C	T	ENSBTAT00000022018, ENSBTAG00000016554	P->L	missense
chr1	57279738	C	T	ENSBTAT00000022018, ENSBTAG00000016554	S->L	missense
chr1	57312155	C	T	ENSBTAT00000022018, ENSBTAG00000016554	S->L	missense
chr1	57312155	C	T	ENSBTAT00000057589, ENSBTAG00000016554	S->L	missense
chr1	57314811	C	T	ENSBTAT00000022018, ENSBTAG00000016554	G->G	synonymous
chr1	57314811	C	T	ENSBTAT00000057589, ENSBTAG00000016554	G->G	synonymous
[truncated: 223,743+ more rows]

## Sheet: NZDC_indelss
NZDC indels
[truncated: 1,538 more rows]
