# Supplementary material for: NGS-based reverse genetic screen for common embryonic lethal mutations compromising fertility in livestock
Source: HighWire-hosted journal article supplement (doi:10.1101/gr.207076.116), 2016-09-19
Supplement: Supplemental_Table_S2.xlsx [file Supplemental_Table_S2.xlsx]

## Sheet: VAR_BBC
Supplemental Table S2A: Candidate variants, BBC
Chromosome	Position	Gene	Mutation type	Subtype	AA_change	observed mut/mut	observed mut/wt	observed wt/wt	p(mutation)	Plots log1/p
1	709976	SLC5A3	NSYN	missense	E->D	4	145	6235	0.0119831	-1.0285
1	2455161	URB1	NSYN	missense	N->K	2	173	6210	0.0138606	-0.186295
1	21695955	ENSBTAG00000047293	NSYN	missense	V->I	0	115	6270	0.00900548	0.51028
1	41745955	ENSBTAG00000047147	NSYN	missense	F->C	3	347	6035	0.0276429	0.286681
1	46400829	ZBTB11	SYN	matched neutral	-	6	317	6062	0.0257635	-0.244821
1	53512374	ENSBTAG00000018397	LOF	nonsense	W->*	7	383	5995	0.0310885	-0.0876364
1	53530599	MYH15	LOF	frame-shift	DEL	0	21	6364	0.00164448	0.0692673
1	56752926	CD96	NSYN	missense	S->A	0	16	6369	0.00125294	0.0518777
1	65560092	GPR156	NSYN	missense	F->C	11	562	5809	0.0457537	0.195703
1	66600463	POLQ	LOF	frame-shift	DEL	25	725	5635	0.0606891	-0.0808084
1	66788709	ENSBTAG00000008862	NSYN	missense	T->M	23	776	5586	0.0643696	0.203255
1	67088066	ILDR1	NSYN	missense	A->S	0	6	6379	0.000469851	0.0187905
1	69756880	UMPS	LOF	nonsense	R->*	0	4	6377	0.00031343	0.0124435
1	70747891	ENSBTAG00000044172	SYN	matched neutral	-	13	492	5880	0.0405638	-0.222099
1	72709145	PPP1R2	NSYN	missense	G->C	6	316	6061	0.0256932	-0.249459
1	73531190	TMEM44	NSYN	missense	W->C	15	552	5818	0.0455756	-0.130272
1	82933418	ENSBTAG00000005209	NSYN	missense	K->E	54	999	5331	0.0867011	-0.262795
1	83424013	ENSBTAG00000002878	NSYN	missense	T->I	1	146	6236	0.0115933	-0.0381829
1	83472509	ENSBTAG00000012881	NSYN	missense	G->W	4	370	6011	0.0296006	0.21102
1	84355991	ENSBTAG00000010394	NSYN	missense	L->I	24	714	5646	0.0596805	-0.069233
1	95161438	GPX6	NSYN	missense	V->M	1	173	6211	0.013704	0.048341
1	95523700	ECT2	NSYN	missense	P->L	145	1662	4578	0.152858	0.0940721
1	95933300	FNDC3B	NSYN	missense	P->L	0	245	6140	0.0191856	1.52087
1	96173101	FNDC3B	NSYN	missense	A->V	54	1118	5213	0.0960063	0.187982
1	103001954	ENSBTAG00000017180	SYN	matched neutral	-	14	619	5752	0.0506656	0.175195
1	103003893	ENSBTAG00000017180	NSYN	missense	E->K	41	932	5412	0.0794049	-0.0296013
1	109753123	GFM1	NSYN	missense	S->P	12	623	5747	0.0506894	0.377556
1	115293934	ENSBTAG00000047341	NSYN	missense	H->R	0	188	6196	0.0147243	1.01711
1	117835494	GPR171	LOF	nonsense	R->*	23	678	5683	0.0567043	-0.152105
1	120127815	GYG1	NSYN	missense	A->T	1	74	6310	0.00595145	-0.399531
1	126489505	SLC9A9	LOF	nonsense	W->*	4	517	5864	0.041112	1.03256
1	127225727	PCOLCE2	LOF	splice-site	-	2	531	5851	0.0419016	1.78733
1	127323830	PLS1	NSYN	missense	D->E	1	168	6215	0.0133145	0.0320784
1	134219478	ENSBTAG00000000750	SYN	matched neutral	-	6	445	5934	0.035787	0.242931
1	140736508	PSMG1	NSYN	missense	C->F	0	31	6354	0.00242756	0.105776
1	143182008	MX1	LOF	splice-site	-	0	11	6374	0.000861394	0.0350547
1	145599941	POFUT2	NSYN	missense	G->S	23	512	5849	0.043703	-1.28992
1	150025900	SETD4	NSYN	missense	L->P	189	1810	4383	0.17142	-0.0274301
1	155158383	OXNAD1	NSYN	missense	I->L	16	514	5853	0.0427699	-0.40152
2	4333329	UGGT1	LOF	frame-shift	INS	16	609	5759	0.0502036	0.00556108
2	7830540	GULP1	NSYN	missense	E->K	3	312	6070	0.0249021	0.141751
2	9016070	CALCRL	NSYN	missense	V->I	36	867	5482	0.0735317	-0.0657396
2	9522905	ZSWIM2	LOF	nonsense	Y->*	199	1775	4396	0.170565	-0.322446
2	13513949	DUSP19	NSYN	missense	H->Y	1	127	6257	0.0101018	-0.109376
2	18067564	ENSBTAG00000026986	NSYN	missense	T->A	0	35	6350	0.0027408	0.121035
2	18086823	ENSBTAG00000026986	NSYN	missense	L->P	43	870	5472	0.074863	-0.390232
2	18141726	ENSBTAG00000026986	NSYN	missense	A->V	6	413	5966	0.0332811	0.11376
2	18152344	ENSBTAG00000026986	NSYN	missense	C->Y	0	36	6349	0.00281911	0.124909
2	18174779	ENSBTAG00000026986	NSYN	missense	K->I	0	8	6377	0.000626468	0.0252296
2	18296432	ENSBTAG00000026986	NSYN	missense	V->I	0	4	6381	0.000313234	0.0124395
2	18307873	ENSBTAG00000026986	NSYN	missense	D->N	0	5	6380	0.000391543	0.015604
2	18308098	ENSBTAG00000026986	NSYN	missense	G->S	4	377	6002	0.0301582	0.240933
2	18325738	ENSBTAG00000026986	NSYN	missense	P->R	4	377	6001	0.030163	0.241063
2	20779703	ENSBTAG00000004835	NSYN	missense	A->V	1	172	6212	0.0136257	0.0450491
2	22410619	SCRN3	NSYN	missense	S->Y	1	77	6307	0.00618637	-0.377931
2	24070597	PDK1	SYN	matched neutral	-	13	475	5896	0.0392387	-0.304993
2	24776289	SLC25A12	NSYN	missense	A->V	11	412	5962	0.0339859	-0.421329
2	24956696	CYBRD1	SYN	matched neutral	-	7	345	6027	0.0281392	-0.249957
2	25140822	METTL8	NSYN	missense	P->S	3	156	6226	0.012686	-0.576655
2	26586159	METTL5	NSYN	missense	Y->C	0	164	6221	0.0128426	0.833606
2	27221461	ABCB11	NSYN	missense	A->V	2	147	6236	0.0118246	-0.321607
2	29092511	ENSBTAG00000017743	NSYN	missense	S->P	0	213	6139	0.0167664	1.23084
2	29093629	ENSBTAG00000017743	NSYN	missense	R->H	9	443	5931	0.0361115	-0.060493
2	29131795	ENSBTAG00000017743	NSYN	missense	D->Y	94	1406	4853	0.125453	0.176197
2	29936804	ENSBTAG00000019137	NSYN	missense	K->T	19	679	5682	0.0561912	0.0678779
2	31044885	SCN2A	NSYN	missense	R->Q	17	667	5680	0.0550754	0.152056
2	31682777	ENSBTAG00000005501	NSYN	missense	Q->L	26	655	5673	0.0556342	-0.474552
2	31907314	GRB14	SYN	matched neutral	-	9	409	5967	0.0334377	-0.196614
2	34256488	ENSBTAG00000008142	NSYN	missense	D->N	0	73	6310	0.00571831	0.28549
2	36274140	ITGB6	NSYN	missense	V->I	8	327	6050	0.0268598	-0.506184
2	36504289	PLA2R1	NSYN	missense	A->T	2	170	6213	0.0136257	-0.200406
2	37240147	ENSBTAG00000004177	NSYN	missense	A->V	0	1	6384	7.83085e-05	0.00307724
2	38780816	ERMN	NSYN	missense	K->R	9	511	5865	0.0414252	0.176632
2	43584157	ARL6IP6	NSYN	missense	P->R	23	678	5684	0.0566954	-0.152339
2	43627780	ENSBTAG00000048151	SYN	matched neutral	-	40	1049	5294	0.088438	0.520446
2	44643093	ENSBTAG00000006907	NSYN	missense	K->E	0	104	6280	0.00814536	0.446893
2	44676865	ENSBTAG00000006907	SYN	matched neutral	-	16	637	5732	0.0523884	0.100397
2	44771974	ENSBTAG00000021020	NSYN	missense	S->L	46	1103	5236	0.0935787	0.479726
2	44773366	ENSBTAG00000021020	NSYN	missense	Q->P	0	49	6336	0.00383712	0.17746
2	48348517	ORC4	NSYN	missense	S->N	4	360	6019	0.0288266	0.170516
2	58552900	ENSBTAG00000017629	NSYN	missense	K->N	3	208	6174	0.016758	-0.250692
2	60546940	ENSBTAG00000044055	NSYN	missense	W->S	0	115	6270	0.00900548	0.51028
2	61884761	LCT	NSYN	missense	I->T	14	777	5593	0.0630482	1.09564
2	62426151	ENSBTAG00000026842	NSYN	missense	V->A	76	1192	5111	0.105346	-0.178087
2	80220705	MYO1B	NSYN	missense	I->V	78	1135	5171	0.101112	-0.557281
2	81264145	TMEFF2	SYN	matched neutral	-	2	265	6118	0.021065	0.147803
2	86566887	ENSBTAG00000007652	NSYN	missense	S->G	1	103	6279	0.00822497	-0.220217
2	88943719	C2H2orf47	NSYN	missense	A->V	0	1	6384	7.83085e-05	0.00307724
2	89568928	AOX1	NSYN	missense	R->C	73	1156	5156	0.101958	-0.244575
2	90666101	ENSBTAG00000007395	NSYN	missense	E->K	0	69	6315	0.00540414	0.266455
2	95516623	FASTKD2	NSYN	missense	V->M	7	282	6095	0.023183	-0.632911
2	97987599	MAP2	NSYN	missense	R->S	0	15	6370	0.00117463	0.048468
2	98439412	ACADL	NSYN	missense	A->T	174	1842	4364	0.17163	0.33711
2	100306728	ENSBTAG00000005239	NSYN	missense	A->T	0	26	6358	0.00203634	0.0872383
2	101908723	ENSBTAG00000018549	NSYN	missense	H->Q	2	167	6210	0.0134034	-0.21449
2	103565978	ABCA12	NSYN	missense	A->P	0	211	6174	0.0165231	1.2086
2	104731950	XRCC5	NSYN	missense	K->R	45	1070	5270	0.0908379	0.355961
2	106675198	TNS1	NSYN	missense	P->R	0	9	6371	0.000705329	0.0284939
2	107313998	PLCD4	NSYN	missense	A->T	0	6	6379	0.000469851	0.0187905
2	108229762	INHA	NSYN	missense	L->F	127	1529	4729	0.139624	-0.0594722
2	112551355	SCG2	NSYN	missense	E->D	121	1602	4661	0.144424	0.35212
2	112900238	SERPINE2	NSYN	missense	V->M	3	244	6138	0.0195771	-0.091891
2	113286961	FAM124B	NSYN	missense	A->T	0	36	6348	0.00281955	0.12492
2	113287236	FAM124B	NSYN	missense	P->L	2	112	6271	0.00908379	-0.561726
2	116250950	COL4A3	NSYN	missense	V->G	3	356	6026	0.0283477	0.327622
2	116911578	ENSBTAG00000021328	NSYN	missense	T->M	1	149	6235	0.0118246	-0.0281467
2	118650136	TRIP12	NSYN	missense	R->L	9	555	5821	0.0448708	0.375797
2	119990235	B3GNT7	LOF	frame-shift	DEL	0	64	6319	0.00501332	0.243293
2	121975401	ENSBTAG00000046044	NSYN	missense	I->T	10	570	5805	0.046202	0.33263
2	122054796	MARCKSL1	NSYN	missense	P->L	552	2769	2976	0.307527	0.74444
2	122125874	MTMR9	NSYN	missense	R->C	10	567	5808	0.0459671	0.318283
2	122148280	IQCC	SYN	matched neutral	-	1	356	6027	0.0280388	0.917955
2	122561407	ENSBTAG00000010050	NSYN	missense	S->N	1	411	5972	0.0323465	1.28588
2	125450885	TRNAU1AP	SYN	matched neutral	-	2	332	6051	0.0263117	0.442583
2	126524486	SYTL1	LOF	frame-shift	INS	5	213	6167	0.0174628	-0.705188
2	126864028	NUDC	NSYN	missense	R->W	8	444	5933	0.0360219	0.0251135
2	126918506	GPN2	NSYN	missense	A->T	0	2	6383	0.000156617	0.00617619
2	127376972	AIM1L	NSYN	missense	G->V	72	1343	4962	0.116591	0.606599
2	127841908	MTFR1L	NSYN	missense	R->H	12	536	5836	0.0438596	0.0201715
2	128225216	LOC282685	NSYN	missense	T->N	12	544	5829	0.0444792	0.0462513
2	128849426	ENSBTAG00000013772	NSYN	missense	E->K	1	124	6260	0.00986688	-0.121832
2	129425608	ENSBTAG00000014885	NSYN	missense	A->P	2	193	6190	0.0154268	-0.100868
2	130400231	ENSBTAG00000009500	SYN	matched neutral	-	1	393	5990	0.0309367	1.15995
2	130937345	ZBTB40	LOF	frame-shift	INS	0	72	6313	0.00563821	0.280645
2	132502350	HP1BP3	SYN	matched neutral	-	1	214	6170	0.0169146	0.196681
2	132890555	ENSBTAG00000013511	NSYN	missense	T->I	0	54	6331	0.00422866	0.198768
3	3265824	ALDH9A1	SYN	matched neutral	-	0	101	6283	0.0079104	0.430158
3	11124043	SPTA1	NSYN	missense	R->Q	0	65	6320	0.00509005	0.247833
3	11180219	SPTA1	NSYN	missense	R->C	0	13	6372	0.00101801	0.0417164
3	12907531	ENSBTAG00000000964	NSYN	missense	T->A	646	2784	2953	0.319286	0.0503948
3	14146326	MRPL24	NSYN	missense	R->W	5	410	5970	0.0328896	0.229808
3	15430485	CLK2	NSYN	missense	R->Q	77	1287	5020	0.11286	0.136014
3	17883478	IVL	NSYN	missense	E->D	6	398	5981	0.0321065	0.060183
3	19389597	POGZ	SYN	matched neutral	-	2	250	6133	0.0198904	0.0925934
3	19741318	GABPB2	NSYN	missense	E->K	1	194	6190	0.0153485	0.121045
3	19811603	FAM63A	NSYN	missense	P->L	136	1709	4540	0.155129	0.524954
3	19847262	SETDB1	NSYN	missense	D->N	0	75	6309	0.00587406	0.295119
3	20696072	OTUD7B	NSYN	missense	R->C	1	212	6172	0.016758	0.188834
3	21582417	ITGA10	SYN	matched neutral	-	1	209	6175	0.0165231	0.177183
3	21640088	RNF115	NSYN	missense	P->S	7	455	5922	0.0367325	0.16273
3	23438698	ENSBTAG00000007909	NSYN	missense	H->Y	0	70	6315	0.0054816	0.271143
3	23649006	HMGCS2	NSYN	missense	A->V	16	729	5640	0.0595928	0.531172
3	23852054	HAO2	NSYN	missense	A->V	100	1276	5009	0.115583	-0.568603
3	26251389	TTF2	NSYN	missense	E->K	1	256	6128	0.0202036	0.376098
3	26769816	IGSF3	NSYN	missense	A->T	192	1866	4327	0.176194	0.125057
3	27742730	VANGL1	NSYN	missense	E->K	103	1339	4943	0.120987	-0.310454
3	29842296	PHTF1	NSYN	missense	D->A	0	2	6383	0.000156617	0.00617619
3	29852437	MAGI3	NSYN	missense	K->Q	6	360	6017	0.0291399	-0.0642526
3	33166576	SLC16A4	NSYN	missense	M->I	4	311	6069	0.0249843	-0.00184427
3	33474661	ALX3	NSYN	missense	R->C	9	427	5949	0.0348473	-0.12062
3	33957741	GNAT2	NSYN	missense	I->T	0	58	6327	0.0045419	0.21626
3	34083136	ENSBTAG00000015470	NSYN	missense	R->K	0	58	6327	0.0045419	0.21626
3	34532728	CLCC1	NSYN	missense	W->C	10	448	5925	0.0366599	-0.131971
3	34571200	GPSM2	SYN	matched neutral	-	10	451	5923	0.0368891	-0.120133
3	34671345	ENSBTAG00000007333	NSYN	missense	L->F	0	84	6301	0.00657792	0.339823
3	40013935	RNPC3	NSYN	missense	P->L	0	39	6344	0.00305499	0.136699
3	43222684	DBT	NSYN	missense	A->V	4	311	6070	0.0249804	-0.00192128
3	43515895	AGL	NSYN	missense	R->Q	73	1165	5146	0.102679	-0.20312
3	50395644	ENSBTAG00000027321	NSYN	missense	E->A	0	0	6384	0	0
3	50413286	ENSBTAG00000027321	NSYN	missense	E->D	165	1793	4358	0.168065	0.331464
3	50448782	TMED5	NSYN	missense	W->R	376	2331	3677	0.241463	-0.0523151
3	51508677	EPHX4	NSYN	missense	R->Q	4	373	6008	0.0298356	0.223614
3	55231950	PKN2	NSYN	missense	E->K	5	261	6119	0.0212216	-0.373631
3	59090495	SYDE2	SYN	matched neutral	-	0	148	6237	0.0115897	0.720588
3	66308679	ENSBTAG00000030932	NSYN	missense	V->M	2	223	6159	0.0177788	0.00310299
3	70880805	FPGT	NSYN	missense	L->M	6	516	5863	0.0413469	0.603173
3	86887020	FGGY	NSYN	missense	G->W	0	17	6368	0.00133125	0.05531
3	93375200	LOC616319	NSYN	missense	D->H	3	248	6134	0.0198904	-0.0768829
3	93532307	LRP8	NSYN	missense	T->I	3	222	6160	0.0178543	-0.183534
3	94566775	ORC1	NSYN	missense	D->E	22	1070	5293	0.0872357	2.61939
3	99587026	STIL	NSYN	missense	S->G	5	661	5719	0.052545	1.92817
3	101070183	NASP	NSYN	missense	G->W	194	1872	4316	0.17706	0.121273
3	101319614	ENSBTAG00000011244	NSYN	missense	I->S	5	592	5781	0.0471935	1.33967
3	107270033	MACF1	NSYN	missense	R->L	3	223	6159	0.0179327	-0.179014
3	107320635	MACF1	NSYN	missense	R->W	455	2432	3497	0.261748	-0.267946
3	108762820	EPHA10	NSYN	missense	E->K	2	372	6010	0.0294486	0.656541
3	111481818	GJA4	NSYN	missense	P->A	0	20	6365	0.00156617	0.0657437
3	114132056	ENSBTAG00000024726	NSYN	missense	R->Q	0	110	6275	0.00861394	0.48104
3	117591518	MLPH	LOF	frame-shift	DEL	21	572	5792	0.0480814	-0.552898
3	117629150	MLPH	NSYN	missense	A->T	1	171	6213	0.0135474	0.0417726
3	120839080	ENSBTAG00000000785	NSYN	missense	G->R	8	279	6098	0.023101	-0.870493
3	121307993	A6QQ23	LOF	frame-shift	DEL	0	25	6360	0.00195771	0.0835919
4	5374926	FIGNL1	NSYN	missense	T->M	8	534	5843	0.0430697	0.397162
4	9284190	ENSBTAG00000007442	NSYN	missense	E->D	63	1273	5049	0.109554	0.596803
4	11854516	SGCE	NSYN	missense	T->M	10	565	5810	0.0458105	0.308824
4	11919400	PEG10	NSYN	missense	R->H	143	1691	4550	0.15484	0.254703
4	12041853	PPP1R9A	NSYN	missense	S->N	0	132	6244	0.0103513	0.615426
4	22929684	DGKB	NSYN	missense	C->Y	5	414	5966	0.0332028	0.247076
4	30616978	ENSBTAG00000013078	LOF	frame-shift	DEL	0	22	6362	0.00172306	0.07282
4	30760269	ENSBTAG00000013078	NSYN	missense	V->M	124	1591	4667	0.144077	0.225701
4	33255022	CROT	NSYN	missense	R->C	57	1210	5115	0.103729	0.519451
4	35692910	SEMA3D	NSYN	missense	R->W	0	40	6344	0.00313283	0.140657
4	44516935	LRRC17	SYN	matched neutral	-	3	358	6024	0.0285043	0.336924
4	44838598	SLC26A5	LOF	splice-site	-	0	36	6349	0.00281911	0.124909
4	49313564	LAMB1	NSYN	missense	A->V	1	197	6188	0.015581	0.131934
4	62464452	ENSBTAG00000005785	NSYN	missense	V->A	27	763	5595	0.0639781	-0.0433081
4	62466981	ENSBTAG00000005785	SYN	matched neutral	-	28	788	5565	0.0661338	-0.00427272
4	62550272	NPSR1	LOF	nonsense	S->*	0	22	6363	0.00172279	0.0728138
4	63869145	BBS9	NSYN	missense	A->V	0	106	6278	0.00830201	0.458184
4	65963377	FAM188B	NSYN	missense	A->V	0	7	6378	0.00054816	0.021999
4	72836856	STEAP4	LOF	frame-shift	DEL	1	26	6358	0.00219264	-0.94764
4	72837719	ENSBTAG00000002340	NSYN	missense	R->W	5	383	5997	0.0307753	0.121453
4	74979610	ENSBTAG00000003508	NSYN	missense	R->I	0	59	6325	0.00462093	0.220715
4	79758295	ENSBTAG00000010671	NSYN	missense	G->D	8	493	5882	0.0398715	0.207442
4	83436655	ENSBTAG00000010300	NSYN	missense	R->C	0	343	6042	0.0268598	2.62001
4	87244891	PTPRZ1	NSYN	missense	S->A	0	28	6357	0.00219264	0.0945787
4	87411603	CBX3	LOF	nonsense	W->*	86	1266	5026	0.112731	-0.155742
4	88752829	LMOD2	NSYN	missense	D->N	1	118	6266	0.00939702	-0.147869
4	93043210	LRRC4	NSYN	missense	L->F	384	2409	3587	0.248981	0.173084
4	96038864	ENSBTAG00000010452	NSYN	missense	A->T	448	2453	3481	0.262379	-0.117408
4	99236379	BPGM	NSYN	missense	R->H	227	2178	3919	0.208096	1.45452
4	100193534	NUP205	SYN	matched neutral	-	5	294	6086	0.0238058	-0.202428
4	103244659	ATP6V0A4	NSYN	missense	I->L	32	857	5496	0.0721222	0.0551579
4	103679462	UBN2	NSYN	missense	R->H	80	1368	4937	0.119655	0.414631
4	104245229	TBXAS1	NSYN	missense	A->D	1	216	6168	0.0170713	0.20459
4	104304777	F1N133	LOF	frame-shift	DEL	0	2	6383	0.000156617	0.00617619
4	105875178	TAS2R3	NSYN	missense	E->K	1	178	6206	0.0140955	0.0650318
4	107813047	FAM115C	NSYN	missense	Y->N	1	178	6206	0.0140955	0.0650318
4	107864188	FAM115A	NSYN	missense	V->I	26	840	5519	0.0698512	0.300659
4	113453982	SSPO	NSYN	missense	D->N	36	932	5414	0.0786587	0.161472
4	113521695	ZNF862	NSYN	missense	L->I	35	966	5383	0.0811404	0.368378
4	114455123	FASTK	NSYN	missense	P->L	287	2030	4057	0.204267	-0.447091
4	118219212	ENSBTAG00000010243	NSYN	missense	A->V	0	9	6376	0.000704777	0.0284824
5	4771389	CAPS2	LOF	frame-shift	DEL	0	88	6297	0.00689115	0.360381
5	10065536	PTPRQ	NSYN	missense	G->E	3	370	6012	0.029444	0.394306
5	10795219	ACSS3	NSYN	missense	D->A	0	17	6368	0.00133125	0.05531
5	11040595	ENSBTAG00000003036	NSYN	missense	N->S	0	243	6142	0.019029	1.50153
5	11974585	CCDC59	NSYN	missense	A->V	11	757	5617	0.0610023	1.4194
5	18010357	ENSBTAG00000009023	NSYN	missense	A->T	1	223	6161	0.0176194	0.232769
5	18328702	KITLG	NSYN	missense	A->D	1442	3338	1605	0.487236	0.911095
5	25068181	ENSBTAG00000014044	NSYN	missense	N->D	1	166	6218	0.0131558	0.0256209
5	26162336	ENSBTAG00000009238	NSYN	missense	G->A	0	0	6385	0	0
5	27404438	ENSBTAG00000046089	SYN	matched neutral	-	38	865	5482	0.0736883	-0.159275
5	27453542	KRT73	NSYN	missense	G->R	78	1255	5050	0.110528	-0.000629174
5	27762916	KRT86	NSYN	missense	R->G	106	1422	4853	0.128036	-0.0349216
5	27762975	KRT86	NSYN	missense	T->M	112	1489	4783	0.134164	0.0727757
5	27822702	ENSBTAG00000016166	LOF	nonsense	Q->*	84	1300	5000	0.114975	0.0106507
5	30285269	TMBIM6	NSYN	missense	Y->F	0	111	6274	0.00869225	0.486834
5	30412286	ENSBTAG00000019283	NSYN	missense	V->M	238	1990	4154	0.1932	0.00349543
5	30958415	ENSBTAG00000014429	NSYN	missense	N->S	0	45	6340	0.00352388	0.160854
5	31256026	CCNT1	NSYN	missense	S->C	100	1434	4850	0.127976	0.125546
5	31257148	CCNT1	NSYN	missense	P->L	24	745	5615	0.0621084	0.0322248
5	32747721	ENDOU	NSYN	missense	G->D	0	10	6375	0.000783085	0.0317574
5	36900090	IRAK4	NSYN	missense	D->G	0	8	6376	0.000626566	0.0252316
5	40892625	LRRK2	NSYN	missense	A->T	6	516	5863	0.0413469	0.603173
5	44047922	BEST3	LOF	frame-shift	DEL	2	123	6257	0.00994986	-0.477346
5	47534372	ENSBTAG00000033726	NSYN	missense	A->T	0	1	6384	7.83085e-05	0.00307724
5	47725092	HELB	NSYN	missense	F->L	52	1107	5225	0.0948465	0.218228
5	49008619	WIF1	NSYN	missense	R->S	79	1293	5012	0.113643	0.104863
5	49740600	C12orf66	LOF	frame-shift	DEL	2	327	6057	0.0259161	0.417724
5	56233086	KIF5A	SYN	matched neutral	-	6	785	5594	0.0624119	2.89191
5	56277960	ENSBTAG00000010616	NSYN	missense	C->R	12	517	5854	0.0423782	-0.0403133
5	56334252	INHBE	NSYN	missense	C->R	6	786	5593	0.0624902	2.90311
5	56340196	E1B7M7	LOF	frame-shift	INS	1	20	6364	0.00172279	-1.0755
5	56521965	R3HDM2	LOF	nonsense	R->*	1	202	6183	0.0159724	0.150487
5	57144826	BAZ2A	NSYN	missense	L->F	27	972	5386	0.0803446	1.02876
5	57283193	TIMELESS	NSYN	missense	R->C	4	218	6163	0.0176977	-0.421049
5	57285141	TIMELESS	SYN	matched neutral	-	27	1002	5355	0.0827068	1.26673
5	57339923	PAN2	NSYN	missense	P->S	7	777	5592	0.0620295	2.5159
5	57544326	ERBB3	NSYN	missense	N->K	0	118	6267	0.00924041	0.528152
5	57753095	MMP19	NSYN	missense	L->M	15	913	5457	0.0738449	2.1415
5	60292495	ENSBTAG00000005120	NSYN	missense	E->A	1	57	6327	0.0046202	-0.540715
5	64660688	SLC17A8	NSYN	missense	W->S	0	46	6339	0.00360219	0.164969
5	70597669	MTERFD3	LOF	frame-shift	DEL	38	979	5364	0.0826673	0.269314
5	71246231	BTBD11	NSYN	missense	Y->C	0	94	6290	0.00736216	0.392048
5	71406031	BPIFC	LOF	frame-shift	DEL	0	81	6304	0.00634299	0.324679
5	72487144	LARGE	NSYN	missense	E->A	142	1607	4633	0.148151	-0.0420517
5	73926273	TOM1	SYN	matched neutral	-	3	144	6238	0.0117463	-0.673555
5	75097710	MYH9	LOF	nonsense	W->*	110	1475	4797	0.132795	0.0636606
5	76499701	ALG10	NSYN	missense	K->N	0	55	6330	0.00430697	0.203103
5	76727649	SYT10	NSYN	missense	F->S	17	522	5846	0.0435395	-0.458305
5	77648024	ENSBTAG00000005453	SYN	matched neutral	-	12	725	5648	0.0586531	1.00354
5	88391270	ST8SIA1	NSYN	missense	R->G	6	408	5968	0.032905	0.0957684
5	92006908	PIK3C2G	NSYN	missense	A->V	0	16	6369	0.00125294	0.0518777
5	93927182	MGST1	NSYN	missense	Y->S	10	472	5903	0.0385278	-0.0431985
5	93927223	MGST1	NSYN	missense	L->F	10	462	5903	0.0378039	-0.0770649
5	95504528	ENSBTAG00000008352	SYN	matched neutral	-	15	648	5722	0.0530932	0.217337
5	95735064	PLBD1	NSYN	missense	S->C	12	487	5886	0.0400157	-0.153586
5	97404272	GPRC5D	NSYN	missense	H->Q	1	220	6164	0.0173845	0.220598
5	97776057	ENSBTAG00000010763	NSYN	missense	E->K	27	876	5481	0.0728383	0.413935
5	98131062	ENSBTAG00000011761	SYN	matched neutral	-	0	140	6245	0.0109632	0.66681
5	100777829	A6QQ73	LOF	frame-shift	INS	0	111	6202	0.00879138	0.490505
5	101329095	A2M	NSYN	missense	D->N	2	420	5960	0.0332184	0.951044
5	103955210	USP5	SYN	matched neutral	-	4	381	6000	0.030462	0.258041
5	104424680	ENSBTAG00000004208	NSYN	missense	R->W	243	2013	4116	0.196092	0.0334552
5	104676990	VWF	NSYN	missense	L->F	10	442	5933	0.0361785	-0.157009
5	107737395	KDM5A	NSYN	missense	D->G	20	606	5759	0.0505873	-0.271024
5	107759142	KDM5A	SYN	matched neutral	-	7	375	6002	0.0304668	-0.118283
5	107818937	CCDC77	NSYN	missense	K->E	69	1124	5191	0.0988409	-0.253802
5	107920018	B4GALNT3	NSYN	missense	G->S	20	610	5755	0.0509005	-0.251671
5	109732828	ENSBTAG00000048271	NSYN	missense	E->K	2	259	6124	0.0205951	0.125249
5	111314893	SYNGR1	NSYN	missense	G->S	1	66	6318	0.00532498	-0.46161
5	111463760	ATF4	NSYN	missense	G->W	1	37	6347	0.00305403	-0.768843
5	112121930	TNRC6B	NSYN	missense	S->F	0	40	6345	0.00313234	0.140644
5	113555107	NAGA	SYN	matched neutral	-	6	441	5937	0.0354793	0.225819
5	113612495	MGC127055	LOF	splice-site	-	5	439	5938	0.0351771	0.362672
5	113624823	CYP2D14	NSYN	missense	G->R	40	918	5410	0.0783606	-0.0366062
5	113680888	TCF20	NSYN	missense	H->L	17	667	5701	0.0548943	0.147478
5	116799920	ATXN10	NSYN	missense	A->V	0	12	6373	0.000939702	0.0383743
5	117708260	ENSBTAG00000008066	NSYN	missense	A->V	0	11	6374	0.000861394	0.0350547
5	118189001	TBC1D22A	SYN	matched neutral	-	5	326	6054	0.0263117	-0.0713237
5	119814252	ENSBTAG00000011000	NSYN	missense	S->N	4	302	6077	0.0242833	-0.0305362
5	120017498	LMF2	NSYN	missense	A->T	0	2	6382	0.000156642	0.00617668
5	120131276	MAPK8IP2	LOF	frame-shift	INS	0	0	6382	0	0
5	120924872	ALG12	NSYN	missense	T->M	181	1778	4421	0.167712	-0.0296488
6	2106851	TMA16	NSYN	missense	K->T	0	51	6334	0.00399374	0.185909
6	7421857	SYNPO2	NSYN	missense	T->P	0	113	6270	0.00885164	0.498606
6	7425406	SYNPO2	NSYN	missense	P->T	0	114	6271	0.00892717	0.504378
6	7661335	ENSBTAG00000003619	NSYN	missense	P->L	2	278	6105	0.022083	0.198829
6	7743246	ENSBTAG00000003619	SYN	matched neutral	-	7	449	5929	0.0362569	0.139062
6	12166842	UGT8	SYN	matched neutral	-	3	212	6170	0.0170713	-0.230745
6	16702397	LRIT3	NSYN	missense	Y->H	7	560	5818	0.0449491	0.693408
6	16702450	LRIT3	NSYN	missense	A->V	7	560	5818	0.0449491	0.693408
6	16835799	PLA2G12A	NSYN	missense	Y->H	13	406	5954	0.033893	-0.741988
6	23535068	MANBA	NSYN	missense	D->H	44	978	5317	0.0840827	0.0311166
6	23536198	MANBA	SYN	matched neutral	-	0	153	6232	0.0119812	0.755121
6	26413153	MTTP	NSYN	missense	P->L	309	2264	3810	0.225756	0.294076
6	27553311	RAP1GDS1	NSYN	missense	A->S	0	8	6377	0.000626468	0.0252296
6	36991200	ENSBTAG00000045966	NSYN	missense	V->M	1	388	5991	0.0305643	1.12676
6	37531587	HERC3	SYN	matched neutral	-	9	511	5865	0.0414252	0.176632
6	38754588	DCAF16	NSYN	missense	V->I	5	548	5831	0.043703	1.00938
6	46745203	SLC34A2	SYN	matched neutral	-	5	280	6100	0.0227095	-0.270181
6	48000832	ENSBTAG00000019353	NSYN	missense	R->H	73	1355	4957	0.117541	0.629783
6	59671582	TLR10	NSYN	missense	G->E	24	1077	5284	0.0880971	2.37922
6	59688855	TLR1	NSYN	missense	T->M	5	521	5859	0.0415818	0.826801
6	67937673	ENSBTAG00000002199	LOF	nonsense	R->*	3	317	6065	0.0252937	0.161069
6	68256570	NFXL1	NSYN	missense	P->H	85	1446	4854	0.126547	0.676809
6	69184551	OCIAD2	NSYN	missense	S->F	10	515	5858	0.0419082	0.0999917
6	69529840	SGCB	SYN	matched neutral	-	26	846	5513	0.0703211	0.329599
6	70683245	LNX1	NSYN	missense	R->Q	4	341	6040	0.0273297	0.0981436
6	82585071	ENSBTAG00000009438	NSYN	missense	V->I	10	504	5871	0.0410337	0.0606138
6	85156379	GNRHR	NSYN	missense	F->L	2	172	6208	0.0137888	-0.190765
6	86811799	UGT2A3	NSYN	missense	I->N	0	143	6241	0.0111999	0.68684
6	90297799	AFM	SYN	matched neutral	-	8	485	5891	0.0392387	0.17423
6	90307683	AFM	NSYN	missense	T->M	1	105	6279	0.00837901	-0.209981
6	92178151	CDKL2	NSYN	missense	A->V	1	117	6267	0.00931872	-0.152361
6	93486397	ENSBTAG00000038148	NSYN	missense	R->T	9	364	6012	0.0299139	-0.431865
6	93487033	ENSBTAG00000038148	NSYN	missense	A->V	0	9	6375	0.000704887	0.0284847
6	107458571	LYAR	NSYN	missense	R->W	44	1037	5302	0.0881247	0.246465
6	108643721	ENSBTAG00000017296	NSYN	missense	S->L	1	60	6322	0.00485665	-0.513023
6	108764129	ENSBTAG00000005964	NSYN	missense	A->V	4	287	6094	0.023101	-0.0834657
6	108841645	PDE6B	NSYN	missense	A->T	0	2	6383	0.000156617	0.00617619
6	113679156	BOD1L	NSYN	missense	E->Q	0	101	6282	0.00791164	0.430202
6	115499250	ENSBTAG00000018638	NSYN	missense	R->Q	0	38	6347	0.00297572	0.132729
6	115705502	ENSBTAG00000006156	LOF	nonsense	R->*	57	1036	5292	0.0900548	-0.212964
6	118164182	ENSBTAG00000019427	NSYN	missense	A->T	0	12	6373	0.000939702	0.0383743
7	2184983	ENSBTAG00000002281	NSYN	missense	V->A	0	3	6381	0.000234962	0.00929766
7	4570087	FKBP8	NSYN	missense	A->V	0	54	6307	0.00424462	0.199208
7	5362236	MAP1S	NSYN	missense	V->I	19	577	5781	0.0482202	-0.334938
7	5655209	ENSBTAG00000045588	NSYN	missense	K->Q	0	76	6298	0.00596172	0.300278
7	5754809	ENSBTAG00000012592	NSYN	missense	R->H	3	473	5909	0.0375098	0.997411
7	6169122	NWD1	LOF	frame-shift	INS	16	498	5871	0.0415035	-0.497777
7	8634243	ENSBTAG00000047933	NSYN	missense	D->N	43	1060	5282	0.0897416	0.408008
7	8804116	AKAP8	NSYN	missense	G->A	40	1071	5274	0.0901331	0.652327
7	15806812	COL5A3	SYN	matched neutral	-	1	375	6008	0.0295269	1.0394
7	16593509	C7H19orf52	LOF	frame-shift	INS	0	103	6282	0.00806578	0.441243
7	17253554	LOC508834	NSYN	missense	R->C	13	719	5649	0.0583764	0.821402
7	17552835	ENSBTAG00000040507	SYN	matched neutral	-	22	739	5624	0.0613156	0.114248
7	18027450	ENSBTAG00000000595	NSYN	missense	T->I	40	969	5376	0.0821457	0.133311
7	19740878	FUT5	NSYN	missense	A->V	13	671	5699	0.0545982	0.524174
7	19795470	ENSBTAG00000001796	NSYN	missense	V->M	40	952	5393	0.0808144	0.0701615
7	19854072	SAFB	NSYN	missense	A->V	18	768	5597	0.0629798	0.557468
7	19926129	SAFB2	NSYN	missense	E->Q	0	191	6193	0.0149593	1.04121
7	20548004	TICAM1	NSYN	missense	I->T	0	66	6319	0.00516836	0.252444
7	20837223	PLIN4	LOF	frame-shift	DEL	0	36	6348	0.00281955	0.12492
7	21454153	TJP3	NSYN	missense	R->H	2	245	6138	0.0194988	0.0750599
7	22877578	2008-09-01	NSYN	missense	R->Q	0	51	6334	0.00399374	0.185909
7	22920741	KIF3A	NSYN	missense	V->F	12	740	5611	0.0600346	1.12505
7	33135670	SRFBP1	NSYN	missense	E->G	5	601	5778	0.047854	1.40925
7	33135858	SRFBP1	LOF	frame-shift	DEL	0	29	6356	0.00227095	0.0982876
7	33312638	FTMT	NSYN	missense	T->I	2	515	5867	0.0406485	1.65323
7	39404501	CDHR2	NSYN	missense	V->M	1	279	6105	0.0220047	0.486305
7	45335198	ENSBTAG00000012172	SYN	matched neutral	-	3	331	6051	0.02639	0.217613
7	52313555	DNAJC18	SYN	matched neutral	-	30	939	5416	0.0782302	0.548383
7	53753798	PCDHA13	NSYN	missense	P->S	0	312	6072	0.0244361	2.24017
7	53948150	ENSBTAG00000039433	NSYN	missense	A->P	0	29	6356	0.00227095	0.0982876
7	54028235	ENSBTAG00000039067	NSYN	missense	A->V	0	29	6356	0.00227095	0.0982876
7	54448422	ENSBTAG00000015938	SYN	matched neutral	-	0	102	6281	0.00798997	0.435754
7	54631135	PCDH1	NSYN	missense	A->T	0	0	6385	0	0
7	59324663	LARS	NSYN	missense	S->C	1	174	6210	0.0137823	0.0516483
7	62942163	ARHGEF37	NSYN	missense	T->I	2	278	6105	0.022083	0.198829
7	63397621	CSF1R	SYN	matched neutral	-	76	1300	5009	0.113704	0.219611
7	63746521	ENSBTAG00000015224	NSYN	missense	A->S	0	19	6366	0.00148786	0.062243
7	63876456	NDST1	NSYN	missense	R->H	202	1884	4299	0.17917	0.0549346
7	64754650	FAT2	NSYN	missense	R->Q	16	620	5749	0.0510572	0.040795
7	64774944	FAT2	NSYN	missense	D->N	0	75	6310	0.00587314	0.295091
7	67100983	ENSBTAG00000005800	NSYN	missense	A->S	11	678	5696	0.054816	0.823822
7	82905316	ZFYVE16	NSYN	missense	L->F	0	13	6370	0.00101833	0.0417232
7	83569262	CKMT2	NSYN	missense	E->K	136	1538	4710	0.141761	-0.200485
7	85732783	VCAN	SYN	matched neutral	-	69	1260	5055	0.109492	0.273093
7	85734481	VCAN	NSYN	missense	E->D	69	1260	5055	0.109492	0.273093
7	85740692	VCAN	NSYN	missense	V->L	69	1260	5055	0.109492	0.273093
7	92540480	ENSBTAG00000006031	NSYN	missense	D->A	0	0	6385	0	0
7	92693716	ENSBTAG00000006031	NSYN	missense	A->T	0	22	6363	0.00172279	0.0728138
7	97318969	ARSK	NSYN	missense	L->F	25	787	5565	0.0656265	0.133689
7	98573233	CAST	SYN	matched neutral	-	41	847	5497	0.0727486	-0.403374
7	102456907	ST8SIA4	SYN	matched neutral	-	3	336	6046	0.0267815	0.238687
8	349217	ANXA10	SYN	matched neutral	-	0	193	6192	0.0151135	1.05731
8	960771	CBR4	NSYN	missense	V->F	161	1618	4606	0.151919	-0.368272
8	7842685	MTMR9	SYN	matched neutral	-	2	337	6046	0.0267032	0.467756
8	10256790	PNOC	NSYN	missense	E->D	121	1460	4804	0.133281	-0.21078
8	17038573	ENSBTAG00000020151	NSYN	missense	D->G	12	762	5611	0.0615505	1.28742
8	17059166	TEK	NSYN	missense	M->L	1	157	6227	0.0124511	-0.00250059
8	25137355	PLIN2	NSYN	missense	T->I	2	137	6246	0.0110415	-0.382455
8	25142896	ENSBTAG00000005718	NSYN	missense	N->D	2	136	6243	0.0109701	-0.388565
8	25319127	FAM154A	NSYN	missense	R->W	271	2141	3965	0.210365	0.202531
8	29438654	FREM1	NSYN	missense	L->Q	0	39	6346	0.00305403	0.136675
8	29463044	FREM1	NSYN	missense	A->V	0	45	6340	0.00352388	0.160854
8	31163009	MPDZ	NSYN	missense	R->H	3	369	6013	0.0293657	0.389422
8	31195594	MPDZ	NSYN	missense	S->F	7	312	6066	0.0255286	-0.431428
8	38554837	GLDC	NSYN	missense	D->A	78	1190	5115	0.105436	-0.252963
8	39231846	ENSBTAG00000001283	NSYN	missense	V->I	5	305	6075	0.0246672	-0.153812
8	45784765	ENSBTAG00000011173	NSYN	missense	V->A	1	183	6200	0.0144893	0.0821591
8	47013843	ENSBTAG00000007778	NSYN	missense	R->C	0	88	6297	0.00689115	0.360381
8	61166753	MELK	NSYN	missense	V->M	13	561	5810	0.0459743	0.0344329
8	61956683	ZBTB5	NSYN	missense	G->R	6	302	6077	0.0245889	-0.321857
8	63814685	TBC1D2	NSYN	missense	D->Y	239	2098	4046	0.201786	0.464805
8	67505068	LPL	NSYN	missense	I->V	31	833	5520	0.0700971	0.0164944
8	67867528	LZTS1	NSYN	missense	G->D	0	89	6296	0.00696946	0.365586
8	67867585	LZTS1	NSYN	missense	R->H	41	922	5418	0.0786711	-0.0626036
8	72509022	ADAMDEC1	NSYN	missense	T->I	4	367	6014	0.0293657	0.198599
8	76366689	CHMP5	NSYN	missense	L->V	5	197	6183	0.0162099	-0.842744
8	77786029	FRMD3	NSYN	missense	S->N	0	54	6331	0.00422866	0.198768
8	82265701	DAPK1	SYN	matched neutral	-	11	542	5832	0.044166	0.115827
8	84851304	ENSBTAG00000008836	NSYN	missense	M->R	1	181	6203	0.0143305	0.0752317
8	90235161	SEMA4D	NSYN	missense	E->K	3	129	6253	0.0105717	-0.809624
8	90292245	ENSBTAG00000001939	SYN	matched neutral	-	2	182	6201	0.0145654	-0.14606
8	92761814	ZNF189	NSYN	missense	I->T	2	167	6214	0.013395	-0.214752
8	92926569	RNF20	NSYN	missense	R->C	0	43	6342	0.00336727	0.152698
8	100143020	ACTL7A	NSYN	missense	V->M	24	827	5532	0.0685414	0.374693
8	105018284	AMBP	NSYN	missense	D->N	70	1174	5111	0.103383	-0.0662633
8	106012898	TNC	NSYN	missense	T->A	8	435	5938	0.0353393	-0.00269817
8	111737211	CDK5RAP2	NSYN	missense	S->C	55	1057	5272	0.0914004	-0.0595724
8	111841423	CDK5RAP2	LOF	nonsense	Q->*	0	96	6289	0.00751762	0.402762
9	712865	PHF3	NSYN	missense	T->M	0	78	6307	0.00610807	0.309768
9	9862237	ENSBTAG00000002171	SYN	matched neutral	-	5	131	6248	0.0110432	-1.61581
9	12864180	ENSBTAG00000007791	NSYN	missense	E->A	0	1	6384	7.83085e-05	0.00307724
9	15762435	MYO6	NSYN	missense	R->H	12	678	5695	0.0549726	0.686352
9	19001410	HMGN3	NSYN	missense	G->D	0	49	6336	0.00383712	0.17746
9	23370646	PGM3	NSYN	missense	G->E	0	92	6293	0.00720439	0.38136
9	23386130	RWDD2A	LOF	frame-shift	DEL	5	468	5910	0.0374432	0.511593
9	32493066	ENSBTAG00000015467	NSYN	missense	T->M	2	122	6261	0.00986688	-0.484847
9	34167186	ENSBTAG00000000264	NSYN	missense	S->Y	89	1447	4848	0.127271	0.521647
9	34398294	ENSBTAG00000011890	NSYN	missense	E->K	1	246	6138	0.0194205	0.330831
9	34890531	TSPYL4	NSYN	missense	D->G	12	594	5778	0.0484023	0.24028
9	38789750	LAMA4	NSYN	missense	I->N	10	528	5846	0.0429198	0.14922
9	39338478	TRAF3IP2	SYN	matched neutral	-	2	271	6112	0.0215348	0.170986
9	41196023	MICAL1	NSYN	missense	R->C	54	1121	5209	0.0962563	0.201163
9	41683748	SESN1	SYN	matched neutral	-	54	1122	5208	0.0963346	0.205468
9	43901174	ENSBTAG00000017527	SYN	matched neutral	-	0	284	6100	0.0222431	1.92271
9	50963637	USP45	SYN	matched neutral	-	0	222	6163	0.0173845	1.30582
9	51163956	ENSBTAG00000044061	NSYN	missense	E->V	9	549	5826	0.0444079	0.346462
9	53322162	MMS22L	NSYN	missense	D->N	0	67	6317	0.00524749	0.257105
9	54038627	UFL1	NSYN	missense	R->H	0	59	6326	0.0046202	0.220695
9	54045673	UFL1	NSYN	missense	V->A	0	0	6385	0	0
9	55111372	MANEA	LOF	frame-shift	DEL	0	64	6321	0.00501175	0.243247
9	63194012	ORC3	SYN	matched neutral	-	2	337	6046	0.0267032	0.467756
9	66247853	MRAP2	NSYN	missense	M->I	6	427	5952	0.0343774	0.167764
9	68347561	ENSBTAG00000010229	SYN	matched neutral	-	5	415	5964	0.0332863	0.251588
9	68665274	ENSBTAG00000010229	NSYN	missense	C->Y	48	1011	5324	0.0867147	-0.000120985
9	73309356	SGK1	NSYN	missense	V->I	4	404	5977	0.0322631	0.363881
9	75238009	MTFR2	NSYN	missense	R->G	31	808	5542	0.0681711	-0.0644945
9	75242616	Q58CR1	LOF	frame-shift	DEL	31	812	5541	0.0684524	-0.0512408
9	75987428	IL20RA	NSYN	missense	E->D	0	48	6336	0.0037594	0.173287
9	77603268	ECT2L	NSYN	missense	R->H	315	2144	3925	0.217262	-0.243028
9	83301099	ENSBTAG00000009665	SYN	matched neutral	-	8	211	6166	0.017776	-1.60628
9	84328511	ENSBTAG00000008112	NSYN	missense	Q->H	20	542	5820	0.045597	-0.649805
9	85721101	STXBP5	NSYN	missense	K->R	0	78	6307	0.00610807	0.309768
9	86983162	ENSBTAG00000001826	NSYN	missense	P->L	2	229	6153	0.0182487	0.0219186
9	90496930	ENSBTAG00000009362	NSYN	missense	M->V	79	1315	4989	0.115385	0.19365
9	90497243	ENSBTAG00000009362	NSYN	missense	Q->K	115	1490	4779	0.134712	0.0200455
9	90500549	ENSBTAG00000009362	NSYN	missense	A->D	0	7	6378	0.00054816	0.021999
9	92485165	CNKSR3	NSYN	missense	Y->F	103	1375	4906	0.123825	-0.145808
9	92872444	ENSBTAG00000031917	NSYN	missense	P->L	92	1392	4895	0.12353	0.156763
9	96258032	ENSBTAG00000005083	NSYN	missense	G->W	78	1309	4998	0.114722	0.196995
9	97020664	ENSBTAG00000003938	NSYN	missense	V->A	0	5	6380	0.000391543	0.015604
9	97680087	IGF2R	NSYN	missense	T->S	0	59	6325	0.00462093	0.220715
9	102931728	RPS6KA2	NSYN	missense	L->V	3	274	6107	0.0219298	0.00996549
9	104374892	SMOC2	NSYN	missense	T->M	12	549	5824	0.0448708	0.0632977
10	1118849	APC	NSYN	missense	N->H	4	388	5993	0.0310102	0.289174
10	1124915	APC	NSYN	missense	Q->K	52	1196	5136	0.101817	0.703356
10	3941804	TRIM36	NSYN	missense	P->A	0	4	6381	0.000313234	0.0124395
10	3941836	TRIM36	NSYN	missense	A->V	0	2	6383	0.000156617	0.00617619
10	4071939	CCDC112	NSYN	missense	R->K	46	860	5479	0.0745497	-0.63555
10	6432782	ENSBTAG00000002781	NSYN	missense	K->N	12	534	5839	0.0436962	0.0136775
10	6920306	POLK	NSYN	missense	A->S	0	0	6385	0	0
10	7835676	ENSBTAG00000000897	NSYN	missense	V->A	4	370	6011	0.0296006	0.21102
10	7894627	F2R	NSYN	missense	V->M	2	198	6184	0.0158208	-0.0816127
10	8116576	AGGF1	NSYN	missense	R->C	3	386	5996	0.0306969	0.474993
10	9146052	AP3B1	NSYN	missense	S->I	1	213	6160	0.0168654	0.193477
10	9934651	ARSB	NSYN	missense	V->M	33	857	5494	0.0722901	0.0156947
10	10701226	ENSBTAG00000006823	NSYN	missense	A->T	0	5	6380	0.000391543	0.015604
10	10998332	THBS4	NSYN	missense	R->Q	35	859	5491	0.0727486	-0.0537818
10	12023565	PDCD7	NSYN	missense	P->S	32	1041	5312	0.0865309	1.07449
10	12494538	SLC24A1	NSYN	missense	E->K	1	188	6196	0.0148786	0.0995739
10	12536011	DENND4A	NSYN	missense	M->V	2	227	6156	0.0180893	0.015521
10	12553002	DENND4A	NSYN	missense	D->N	4	423	5958	0.033751	0.45902
10	12565607	DENND4A	SYN	matched neutral	-	2	229	6154	0.0182459	0.0218605
10	15091429	FEM1B	SYN	matched neutral	-	35	918	5431	0.077381	0.15038
10	17663850	LARP6	LOF	nonsense	W->*	0	106	6279	0.0083007	0.458137
10	18637022	NR2E3	NSYN	missense	R->H	2	354	6029	0.0280345	0.556658
10	20567736	SDR39U1	NSYN	missense	R->H	0	39	6346	0.00305403	0.136675
10	20592206	NYNRIN	SYN	matched neutral	-	8	557	5818	0.0448849	0.519629
10	20736412	TGM1	NSYN	missense	G->W	2	191	6192	0.0152702	-0.108775
10	20800600	TM9SF1	SYN	matched neutral	-	6	631	5748	0.0503524	1.40392
10	21217824	AP1G2	NSYN	missense	V->A	0	27	6358	0.00211433	0.0908931
10	21219362	AP1G2	NSYN	missense	T->M	1	670	5713	0.0526316	3.6995
10	21226524	THTPA	NSYN	missense	I->L	1	698	5686	0.054816	4.02775
10	21374093	MYH6	DEL1aa	DEL	DEL1aa	0	629	5755	0.0492638	7.59383
10	21628476	ENSBTAG00000011571	NSYN	missense	P->A	0	1	6384	7.83085e-05	0.00307724
10	26059694	ARHGEF40	LOF	frame-shift	DEL	9	662	5713	0.0532581	1.03167
10	27231104	ENSBTAG00000046651	LOF	nonsense	R->*	12	708	5665	0.0573218	0.883198
10	35925061	BUB1B	NSYN	missense	L->F	53	1116	5216	0.095693	0.217729
10	36924740	NUSAP1	LOF	splice-site	-	194	1953	4234	0.183435	0.52066
10	37063601	RPAP1	SYN	matched neutral	-	2	332	6051	0.0263117	0.442583
10	37081594	TYRO3	SYN	matched neutral	-	0	75	6310	0.00587314	0.295091
10	37651342	PLA2G4F	NSYN	missense	F->L	0	171	6213	0.0133929	0.885463
10	37791940	ENSBTAG00000008866	NSYN	missense	F->L	28	795	5560	0.0666614	0.0171686
10	43829781	PYGL	NSYN	missense	L->V	1	189	6195	0.0149569	0.103113
10	45322944	PIF1	NSYN	missense	R->Q	4	298	6083	0.0239624	-0.0441651
10	47311709	ENSBTAG00000003667	SYN	matched neutral	-	32	797	5556	0.0674236	-0.154688
10	47459478	ENSBTAG00000003667	SYN	matched neutral	-	1	144	6240	0.011433	-0.0451639
10	48176686	ENSBTAG00000038920	NSYN	missense	E->A	1	134	6250	0.01065	-0.0816772
10	48219734	ENSBTAG00000038920	NSYN	missense	R->H	2	243	6140	0.0193422	0.0681679
10	48256721	ENSBTAG00000038920	NSYN	missense	R->H	1	508	5855	0.0400691	2.06456
10	49789720	NARG2	SYN	matched neutral	-	7	331	6046	0.0270207	-0.32245
10	53739781	ENSBTAG00000001486	NSYN	missense	K->R	244	1871	4257	0.185107	-0.658185
10	54041689	MNS1	LOF	nonsense	R->*	0	98	6287	0.00767424	0.413623
10	54950734	DYX1C1	NSYN	missense	V->I	1	112	6272	0.00892717	-0.175511
10	56122340	UNC13C	NSYN	missense	P->A	0	12	6373	0.000939702	0.0383743
10	56389027	UNC13C	NSYN	missense	E->G	121	1463	4798	0.133579	-0.195704
10	58976212	ENSBTAG00000000737	SYN	matched neutral	-	19	684	5681	0.0565476	0.084822
10	61449281	ENSBTAG00000046553	NSYN	missense	F->L	1	222	6162	0.0175411	0.228696
10	61747850	ENSBTAG00000011661	NSYN	missense	A->T	0	0	6385	0	0
10	62025500	FBN1	NSYN	missense	T->M	14	695	5676	0.0566171	0.548563
10	62467017	MYEF2	NSYN	missense	R->H	57	1098	5228	0.0949397	0.017685
10	65410095	A4UQU4	LOF	frame-shift	DEL	0	12	6373	0.000939702	0.0383743
10	65492702	DUOX1	NSYN	missense	G->E	0	175	6210	0.013704	0.915575
10	65500265	DUOX1	LOF	splice-site	-	54	1058	5273	0.0913078	-0.0265988
10	65515343	DUOX1	NSYN	missense	V->M	2	263	6119	0.0209117	0.140294
10	67763816	MAPK1IP1L	NSYN	missense	P->L	165	1865	4355	0.171887	0.684296
10	68076288	ATG14	NSYN	missense	P->A	0	2	6383	0.000156617	0.00617619
10	69283385	TMEM260	NSYN	missense	L->F	0	41	6344	0.00321065	0.144638
10	70761781	ACTR10	SYN	matched neutral	-	2	210	6172	0.0167607	-0.0387202
10	70872276	ARID4A	NSYN	missense	K->Q	2	211	6170	0.0168416	-0.0352817
10	70945814	ENSBTAG00000004631	NSYN	missense	V->I	2	211	6172	0.0168363	-0.0353951
10	70960978	ENSBTAG00000004631	SYN	matched neutral	-	2	211	6172	0.0168363	-0.0353951
10	76488755	SYNE2	LOF	frame-shift	DEL	1	211	6173	0.0166797	0.184935
10	76547623	SYNE2	NSYN	missense	M->T	59	1158	5167	0.0999373	0.175288
10	76944920	ZBTB25	NSYN	missense	S->F	63	1174	5146	0.101833	0.108663
10	77011211	ENSBTAG00000007809	NSYN	missense	A->T	1	296	6088	0.0233359	0.573254
10	77989800	FUT8	NSYN	missense	D->H	31	1011	5342	0.0840382	0.940833
10	81462845	GALNTL1	NSYN	missense	A->V	0	2	6383	0.000156617	0.00617619
10	82131089	SLC8A3	NSYN	missense	T->M	195	1963	4227	0.18426	0.554196
10	86714604	ENSBTAG00000013983	NSYN	missense	K->Q	0	18	6366	0.00140977	0.05877
10	87662262	ENSBTAG00000005489	SYN	matched neutral	-	0	81	6304	0.00634299	0.324679
10	89810557	SPTLC2	NSYN	missense	A->S	0	0	6385	0	0
10	103995291	EIF3J	NSYN	missense	E->A	0	2	6383	0.000156617	0.00617619
11	1373763	ENSBTAG00000004297	NSYN	missense	H->Y	5	323	6056	0.0260808	-0.0822268
11	2537269	ARID5A	NSYN	missense	A->T	3	319	6063	0.0254503	0.168925
11	3115203	ENSBTAG00000006744	SYN	matched neutral	-	11	371	6003	0.0307753	-0.69538
11	5449781	ENSBTAG00000004327	NSYN	missense	F->C	3	461	5920	0.0365758	0.917194
11	6648186	ENSBTAG00000013023	SYN	matched neutral	-	6	443	5935	0.035636	0.234413
11	9253688	FHL2	NSYN	missense	G->D	11	571	5803	0.046437	0.233555
11	9742966	ENSBTAG00000013108	NSYN	missense	M->V	2	186	6196	0.014881	-0.129077
11	10088843	LOXL3	NSYN	missense	V->L	2	339	6044	0.0268598	0.47795
11	10092556	HTRA2	NSYN	missense	R->C	2	421	5955	0.0333177	0.958484
11	10106247	TLX2	NSYN	missense	H->R	34	957	5383	0.0804048	0.385738
11	10139542	ENSBTAG00000016600	NSYN	missense	S->R	2	396	5987	0.0313234	0.798269
11	11355798	RAB11FIP5	NSYN	missense	P->S	27	771	5586	0.0646147	-0.0167548
11	13043953	DYSF	SYN	matched neutral	-	3	357	6025	0.028426	0.332264
11	13589091	ENSBTAG00000004560	LOF	nonsense	Q->*	2	257	6126	0.0204385	0.11787
11	13715869	ADD2	SYN	matched neutral	-	16	767	5602	0.0625685	0.764166
11	15132378	BIRC6	NSYN	missense	V->I	74	1263	5046	0.110528	0.12695
11	16103458	RASGRP3	SYN	matched neutral	-	1	44	6340	0.00360219	-0.678443
11	19302484	VIT	NSYN	missense	R->W	38	943	5404	0.0797964	0.116287
11	21219314	DHX57	NSYN	missense	R->K	74	1173	5138	0.103446	-0.200575
11	22796802	SLC8A1	NSYN	missense	A->V	2	314	6069	0.0249021	0.355618
11	25784465	ENSBTAG00000003555	NSYN	missense	L->F	1	103	6280	0.00822368	-0.22026
11	26167667	ABCG8	NSYN	missense	R->H	4	272	6109	0.0219264	-0.142752
11	26267457	ENSBTAG00000016368	SYN	matched neutral	-	1	268	6116	0.0211433	0.432535
11	29051016	SOCS5	SYN	matched neutral	-	77	1216	5091	0.107299	-0.111671
11	29723253	MSH2	NSYN	missense	V->M	3	169	6212	0.0137061	-0.481921
11	37571032	EML6	SYN	matched neutral	-	1	190	6194	0.0150352	0.106669
11	37588401	RTN4	SYN	matched neutral	-	1	190	6193	0.0150376	0.106722
11	43527336	REL	SYN	matched neutral	-	14	538	5833	0.0443226	-0.110661
11	47223666	RPIA	LOF	splice-site	-	0	180	6205	0.0140955	0.953996
11	48605352	PTCD3	NSYN	missense	D->E	47	1128	5210	0.095693	0.568676
11	55604858	CTNNA2	SYN	matched neutral	-	14	512	5859	0.0422866	-0.220789
11	59919064	ENSBTAG00000006027	NSYN	missense	I->V	49	900	5423	0.0783114	-0.554637
11	61376868	ENSBTAG00000044173	NSYN	missense	D->V	0	38	6346	0.00297619	0.132741
11	63417936	CEP68	LOF	frame-shift	DEL	1	249	6136	0.0196524	0.344155
11	70571825	ENSBTAG00000007379	NSYN	missense	G->R	8	499	5878	0.0403289	0.232745
11	70782693	ENSBTAG00000044021	NSYN	missense	P->L	1	100	6284	0.00798747	-0.236206
11	73079228	OTOF	NSYN	missense	D->N	51	1093	5237	0.0936374	0.19834
11	74929806	ENSBTAG00000023172	NSYN	missense	Q->H	1	267	6106	0.0211013	0.428854
11	80970221	GEN1	LOF	frame-shift	DEL	0	44	6341	0.00344558	0.156764
11	86187502	NTSR2	LOF	frame-shift	DEL	21	712	5652	0.0590446	0.0713213
11	86598021	PQLC3	NSYN	missense	Q->K	1	93	6291	0.00743931	-0.275406
11	90057085	ENSBTAG00000019979	SYN	matched neutral	-	10	524	5850	0.0426065	0.133654
11	97651820	ENSBTAG00000039343	NSYN	missense	E->A	19	692	5673	0.0571742	0.114291
11	98108044	GARNL3	NSYN	missense	R->Q	16	581	5788	0.0480031	-0.0889333
11	98188968	ENSBTAG00000023885	SYN	matched neutral	-	4	248	6130	0.0200564	-0.25251
11	101406596	NUP214	NSYN	missense	T->M	65	1255	5064	0.108474	0.403021
11	101609311	ENSBTAG00000004400	NSYN	missense	D->E	4	301	6080	0.0241973	-0.0340241
11	102418006	ENSBTAG00000024822	NSYN	missense	D->F	4	418	5963	0.0333594	0.433307
11	103887508	SNAPC4	LOF	frame-shift	DEL	0	571	5783	0.0449323	6.39523
11	103942639	ENSBTAG00000023933	NSYN	missense	V->I	1	374	6009	0.0294486	1.03286
11	104310958	MED22	LOF	frame-shift	DEL	0	103	6282	0.00806578	0.441243
11	105575878	ENSBTAG00000038691	NSYN	missense	R->C	22	617	5745	0.0517701	-0.373756
11	105866652	SLC34A3	LOF	frame-shift	DEL	0	139	6244	0.0108883	0.660357
12	401810	PCDH20	NSYN	missense	G->V	1	97	6287	0.00775255	-0.252634
12	1534704	TDRD3	NSYN	missense	E->G	0	7	6378	0.00054816	0.021999
12	5163790	PCDH17	SYN	matched neutral	-	20	534	5831	0.0449491	-0.708309
12	11364934	KBTBD6	NSYN	missense	V->M	2	249	6134	0.0198121	0.089052
12	11464002	MTRF1	NSYN	missense	V->I	0	78	6305	0.00610998	0.309829
12	11848492	ENSBTAG00000001133	SYN	matched neutral	-	30	719	5635	0.0610119	-0.415644
12	11906100	ENSBTAG00000001133	NSYN	missense	A->T	0	9	6376	0.000704777	0.0284824
12	15674224	COG3	NSYN	missense	R->C	8	472	5905	0.0382146	0.123177
12	18248252	RB1	SYN	matched neutral	-	1	91	6292	0.00728383	-0.28714
12	19127702	SETDB2	NSYN	missense	H->Y	249	2046	4089	0.199248	0.0757542
12	20477718	RNASEH2B	LOF	splice-site	-	14	513	5858	0.0423649	-0.216193
12	21448966	ENSBTAG00000010353	NSYN	missense	G->D	1	124	6259	0.00986842	-0.12179
12	21541995	ENSBTAG00000019134	LOF	nonsense	Q->*	1	380	6004	0.0299139	1.07215
12	21660743	VPS36	SYN	matched neutral	-	6	423	5954	0.0340749	0.152205
12	22750289	COG6	NSYN	missense	L->I	8	501	5875	0.0404919	0.241633
12	23240720	NHLRC3	NSYN	missense	A->G	33	890	5462	0.074863	0.131929
12	23253942	ENSBTAG00000010949	SYN	matched neutral	-	0	239	6146	0.0187157	1.46322
12	23467835	ENSBTAG00000017032	NSYN	missense	N->S	0	64	6321	0.00501175	0.243247
12	24705761	FAM48A	NSYN	missense	A->G	0	20	6364	0.00156642	0.0657492
12	28811515	FRY	NSYN	missense	A->G	0	1	6384	7.83085e-05	0.00307724
12	30025457	MEDAG	NSYN	missense	V->I	0	36	6348	0.00281955	0.12492
12	44616876	KLHL1	NSYN	missense	E->G	1	127	6257	0.0101018	-0.109376
12	54798203	ENSBTAG00000017573	NSYN	missense	A->V	63	1120	5201	0.0975877	-0.0747721
12	61065977	ENSBTAG00000004388	NSYN	missense	F->L	1	123	6261	0.00978857	-0.126065
12	69532214	DCT	NSYN	missense	A->S	0	337	6048	0.02639	2.54407
12	70117004	ENSBTAG00000032603	SYN	matched neutral	-	4	502	5863	0.0400377	0.93388
12	70117183	ENSBTAG00000032603	NSYN	missense	E->Q	3	359	6020	0.0285961	0.342006
12	77067091	ENSBTAG00000004401	NSYN	missense	G->D	0	2	6383	0.000156617	0.00617619
12	77067127	ENSBTAG00000004401	NSYN	missense	H->R	0	232	6153	0.0181676	1.39735
12	77067825	ENSBTAG00000004401	NSYN	missense	R->H	0	44	6341	0.00344558	0.156764
12	79778601	DOCK9	NSYN	missense	D->N	0	182	6203	0.0142522	0.969568
12	83087396	ERCC5	NSYN	missense	R->Q	13	416	5956	0.0346124	-0.670104
12	88114238	ENSBTAG00000018237	NSYN	missense	A->T	0	7	6374	0.000548503	0.022006
12	90392331	ENSBTAG00000000446	SYN	matched neutral	-	2	231	6152	0.0184025	0.0282688
13	536819	TMX4	NSYN	missense	E->D	6	336	6034	0.0272898	-0.15713
13	2273538	PLCB4	NSYN	missense	M->I	103	1271	5010	0.11568	-0.72162
13	10334492	ENSBTAG00000000939	NSYN	missense	P->L	7	488	5889	0.039317	0.305177
13	12206488	CDC123	SYN	matched neutral	-	11	435	5939	0.035787	-0.294796
13	13037386	CELF2	SYN	matched neutral	-	3	300	6082	0.0239624	0.0972644
13	19132393	ENSBTAG00000014991	SYN	matched neutral	-	6	417	5962	0.0335944	0.128794
13	24273585	ARMC3	NSYN	missense	A->V	0	1	6384	7.83085e-05	0.00307724
13	25563554	ENSBTAG00000018395	NSYN	missense	R->G	7	312	6066	0.0255286	-0.431428
13	25609403	ENSBTAG00000018395	SYN	matched neutral	-	7	485	5893	0.039076	0.29113
13	26105806	ENKUR	NSYN	missense	P->T	6	432	5947	0.034769	0.187995
13	28257146	PHYH	NSYN	missense	A->V	9	602	5774	0.0485513	0.633685
13	28262784	PHYH	NSYN	missense	N->S	9	602	5774	0.0485513	0.633685
13	29965236	RPP38	NSYN	missense	R->W	21	632	5732	0.05278	-0.221844
13	32431601	STAM	NSYN	missense	L->I	66	1097	5222	0.0962412	-0.272562
13	33774148	ARHGAP12	NSYN	missense	P->A	2	141	6242	0.0113547	-0.357458
13	35338802	KIAA1462	NSYN	missense	A->V	13	523	5849	0.0429914	-0.0925824
13	38853125	POLR3F	NSYN	missense	G->R	2	293	6090	0.0232576	0.261386
13	40009382	ENSBTAG00000009291	NSYN	missense	P->A	104	1519	4758	0.135324	0.411942
13	40027203	ENSBTAG00000009291	NSYN	missense	R->W	30	810	5543	0.0681498	-0.0162699
13	42979550	APMAP	SYN	matched neutral	-	1	296	6088	0.0233359	0.573254
13	48625510	FERMT1	NSYN	missense	R->Q	1	300	6084	0.0236492	0.594393
13	51976553	ENSBTAG00000013163	NSYN	missense	L->F	0	18	6367	0.00140955	0.0587651
13	52813240	PCED1A	LOF	nonsense	Q->*	60	1294	5031	0.110728	0.902322
13	55006114	ENSBTAG00000046520	SYN	matched neutral	-	5	307	6073	0.0248238	-0.145387
13	58048043	GNAS	NSYN	missense	K->E	198	1943	4243	0.183192	0.377859
13	61988285	TTLL9	NSYN	missense	A->T	2	273	6110	0.0216915	0.178854
13	62411144	ENSBTAG00000031402	NSYN	missense	C->Y	11	546	5828	0.0444792	0.131021
13	62712573	DNMT3B	NSYN	missense	G->S	168	1672	4541	0.157342	-0.242845
13	63410483	SNTA1	NSYN	missense	R->H	3	316	6066	0.0252153	0.157168
13	64657933	ENSBTAG00000007930	NSYN	missense	A->V	0	103	6282	0.00806578	0.441243
13	66632699	ENSBTAG00000021669	NSYN	missense	A->V	0	0	6385	0	0
13	67769725	ENSBTAG00000019378	NSYN	missense	S->F	1	57	6327	0.0046202	-0.540715
13	67848138	BPI	LOF	nonsense	Q->*	1	114	6270	0.00908379	-0.16611
13	68463637	DHX35	NSYN	missense	E->A	0	8	6377	0.000626468	0.0252296
13	73621075	TTPAL	SYN	matched neutral	-	9	428	5948	0.0349256	-0.116673
13	74944730	LOC404103	NSYN	missense	E->K	1	130	6254	0.0103367	-0.0972774
13	75417469	ZNF335	NSYN	missense	L->I	5	295	6085	0.0238841	-0.197845
13	75642413	CDH22	NSYN	missense	D->Y	12	653	5717	0.0530398	0.538337
13	75805092	SLC35C2	SYN	matched neutral	-	5	392	5987	0.031485	0.156113
13	78324968	PTGIS	NSYN	missense	E->Q	192	1833	4358	0.173664	0.00919127
13	78351891	PTGIS	NSYN	missense	Y->H	105	1487	4792	0.13291	0.22385
13	79646818	KCNG1	NSYN	missense	W->C	66	1196	5121	0.104026	0.101769
13	81856734	ENSBTAG00000030556	SYN	matched neutral	-	13	546	5823	0.0448135	-0.0127117
14	1616471	RECQL4	NSYN	missense	P->H	11	583	5782	0.0474435	0.289436
14	1661275	KIFC2	NSYN	missense	M->T	0	78	6305	0.00610998	0.309829
14	1844014	ENSBTAG00000009811	NSYN	missense	N->I	4	209	6172	0.016993	-0.479205
14	1947890	EXOSC4	LOF	nonsense	R->*	0	121	6264	0.00947533	0.54627
14	5269142	ENSBTAG00000015374	NSYN	missense	P->L	17	634	5733	0.0523183	0.0288756
14	5295902	ENSBTAG00000015374	NSYN	missense	E->D	0	460	5924	0.0360276	4.33203
14	5677962	ENSBTAG00000048078	NSYN	missense	G->V	0	21	6364	0.00164448	0.0692673
14	8208809	ENSBTAG00000017731	NSYN	missense	E->K	56	1068	5261	0.0924041	-0.0519847
14	21116077	PRKDC	LOF	frame-shift	DEL	0	17	6368	0.00133125	0.05531
14	22858625	ENSBTAG00000005560	NSYN	missense	P->L	45	1045	5293	0.088908	0.237625
14	22864760	ENSBTAG00000005560	SYN	matched neutral	-	46	1045	5293	0.0890508	0.194333
14	29847069	YTHDF3	NSYN	missense	A->V	0	0	6385	0	0
14	32710182	ADHFE1	NSYN	missense	A->G	0	184	6198	0.0144155	0.985598
14	32782100	C14H8orf46	NSYN	missense	T->M	5	298	6081	0.0241228	-0.184188
14	33316888	CSPP1	SYN	matched neutral	-	62	1213	5110	0.104699	0.311062
14	34140587	PREX2	SYN	matched neutral	-	60	1209	5114	0.104105	0.374527
14	34826330	C14H8orf34	NSYN	missense	G->C	28	799	5557	0.0669643	0.0298647
14	35520915	ENSBTAG00000004720	SYN	matched neutral	-	6	296	6082	0.0241228	-0.354829
14	35610700	ENSBTAG00000032881	NSYN	missense	K->E	6	296	6080	0.0241304	-0.354558
14	48319396	EXT1	SYN	matched neutral	-	18	784	5578	0.0642633	0.654769
14	54240961	ENSBTAG00000038281	NSYN	missense	P->L	4	336	6045	0.0269381	0.0802956
14	62303231	LRP12	NSYN	missense	T->M	0	73	6312	0.00571652	0.285435
14	65826102	PABPC1	SYN	matched neutral	-	1	199	6185	0.01574	0.139366
14	67061082	ENSBTAG00000012357	NSYN	missense	Q->P	1	221	6157	0.0174792	0.225064
14	68339218	NIPAL2	LOF	frame-shift	INS	1	96	6288	0.00767424	-0.258232
14	68596202	MATN2	NSYN	missense	R->P	35	784	5452	0.0680912	-0.346251
14	69146169	TSPYL5	NSYN	missense	P->S	39	839	5505	0.0718314	-0.331031
14	69287832	CPQ	NSYN	missense	A->T	243	2035	4107	0.197416	0.10316
14	70415627	GDF6	NSYN	missense	R->K	2	179	6204	0.0143305	-0.159132
14	71795246	INTS8	SYN	matched neutral	-	1	222	6162	0.0175411	0.228696
14	76128797	NBN	NSYN	missense	H->Y	0	91	6294	0.00712608	0.376076
14	78504361	CPNE3	NSYN	missense	V->I	0	28	6357	0.00219264	0.0945787
14	78609009	WWP1	NSYN	missense	R->Q	51	1489	4845	0.124589	3.83245
15	14427749	MAML2	NSYN	missense	L->F	46	1074	5264	0.0913221	0.327317
15	14556048	MAML2	LOF	nonsense	R->*	0	22	6363	0.00172279	0.0728138
15	18461649	ENSBTAG00000008253	NSYN	missense	I->V	0	182	6203	0.0142522	0.969568
15	18461736	ENSBTAG00000008253	NSYN	missense	G->R	1	120	6264	0.00955364	-0.139018
15	22720542	TIMM8B	NSYN	missense	S->T	224	1987	4174	0.190681	0.156003
15	27850960	BUD13	NSYN	missense	S->F	0	22	6363	0.00172279	0.0728138
15	27866369	ZNF259	SYN	matched neutral	-	1	357	6026	0.0281172	0.924199
15	28529737	ENSBTAG00000016692	NSYN	missense	G->R	19	582	5784	0.0485513	-0.310861
15	29692889	ENSBTAG00000018093	NSYN	missense	S->R	0	25	6360	0.00195771	0.0835919
15	29807316	PHLDB1	NSYN	missense	T->M	5	532	5843	0.0424765	0.900735
15	30455898	MFRP	NSYN	missense	T->M	12	561	5812	0.0458105	0.1063
15	35429504	ENSBTAG00000000987	NSYN	missense	S->F	0	8	6377	0.000626468	0.0252296
15	35546410	USH1C	NSYN	missense	A->V	0	4	6381	0.000313234	0.0124395
15	35612879	ABCC8	NSYN	missense	R->C	0	12	6373	0.000939702	0.0383743
15	35661529	B7H6	NSYN	missense	S->L	19	719	5647	0.0592796	0.223671
15	36135662	ENSBTAG00000006974	NSYN	missense	S->L	255	2044	4085	0.200031	0.00694142
15	43252565	SBF2	NSYN	missense	L->M	5	308	6071	0.024906	-0.141117
15	44252616	C15H11orf16	NSYN	missense	G->E	0	110	6274	0.00861529	0.48109
15	44260555	AKIP1	NSYN	missense	K->N	0	110	6275	0.00861394	0.48104
15	44426340	ST5	NSYN	missense	T->A	3	303	6079	0.0241973	0.108138
15	47043084	ENSBTAG00000015405	NSYN	missense	R->W	330	2338	3716	0.234806	0.409538
15	47229586	HPX	NSYN	missense	T->A	14	530	5841	0.0436962	-0.142517
15	47448240	FAM160A2	NSYN	missense	R->H	18	745	5622	0.061159	0.428872
15	48191575	ENSBTAG00000046618	LOF	nonsense	Q->*	5	256	6124	0.0208301	-0.403233
15	48707581	UBQLN3	NSYN	missense	R->H	6	289	6090	0.0235709	-0.395337
15	52603414	FOLR2	NSYN	missense	A->T	0	0	6385	0	0
15	54198728	UCP2	NSYN	missense	A->T	0	0	6385	0	0
15	56649544	C15H11orf30	NSYN	missense	T->P	0	37	6348	0.00289742	0.128807
15	56827166	LRRC32	NSYN	missense	A->T	0	38	6347	0.00297572	0.132729
15	61765888	FSHB	NSYN	missense	D->N	0	198	6187	0.0155051	1.09837
15	62908773	DCDC1	NSYN	missense	Y->C	146	1755	4484	0.160298	0.518043
15	65485162	CAPRIN1	SYN	matched neutral	-	3	264	6118	0.0211433	-0.0214618
15	77690911	LRP4	NSYN	missense	R->H	14	671	5700	0.0547377	0.416953
15	78352563	MADD	SYN	matched neutral	-	6	508	5870	0.0407268	0.557696
15	81819054	SSRP1	NSYN	missense	R->C	56	1004	5323	0.0874197	-0.324697
15	83581884	FAM111B	NSYN	missense	G->R	8	608	5769	0.0488645	0.829239
15	83670317	MPEG1	SYN	matched neutral	-	7	463	5915	0.0373532	0.195075
15	84784998	NCAPD3	NSYN	missense	A->T	0	0	6385	0	0
15	84961995	ENSBTAG00000038756	NSYN	missense	S->L	0	127	6258	0.00994518	0.583251
16	1283700	ATP2B4	NSYN	missense	R->H	1	52	6332	0.00422866	-0.589886
16	3003854	ENSBTAG00000034632	NSYN	missense	I->V	0	76	6309	0.00595145	0.299958
16	3003908	ENSBTAG00000034632	NSYN	missense	S->G	68	1162	5154	0.10166	-0.0653891
16	3212068	ELK4	NSYN	missense	G->R	14	627	5744	0.0512921	0.208573
16	4542348	PIGR	NSYN	missense	G->K	69	1320	4995	0.114192	0.598293
16	4949979	LOC510860	NSYN	missense	V->D	196	1705	4480	0.164316	-0.688539
16	16021712	FAM5C	SYN	matched neutral	-	7	472	5906	0.0380579	0.233178
16	19576252	USH2A	NSYN	missense	K->R	39	1065	5280	0.0895207	0.682587
16	19849335	USH2A	NSYN	missense	S->C	270	2065	4048	0.204058	-0.069443
16	19866542	USH2A	NSYN	missense	I->M	1	62	6321	0.00501253	-0.495377
16	20403567	USH2A	NSYN	missense	R->H	40	937	5407	0.0796523	0.0199136
16	24218527	EPRS	NSYN	missense	Y->C	2	213	6170	0.016993	-0.0287164
16	24826954	MARK1	SYN	matched neutral	-	1	217	6163	0.0171603	0.208842
16	27712334	CAPN8	NSYN	missense	A->S	49	1125	5208	0.0958164	0.444117
16	27815337	CAPN2	SYN	matched neutral	-	46	1125	5213	0.0953164	0.609879
16	37794784	NDK7	LOF	frame-shift	DEL	28	814	5542	0.0681391	0.0812775
16	37994845	F5	SYN	matched neutral	-	7	461	5917	0.0371966	0.186831
16	38248391	METTL18	NSYN	missense	A->V	0	18	6367	0.00140955	0.0587651
16	38280201	ENSBTAG00000014793	SYN	matched neutral	-	30	828	5526	0.0695489	0.0408485
16	38301240	SCYL3	NSYN	missense	P->L	95	1406	4883	0.125	0.135127
16	43830268	ENSBTAG00000019818	NSYN	missense	A->T	0	2	6383	0.000156617	0.00617619
16	44149036	ENSBTAG00000004966	NSYN	missense	R->C	0	62	6323	0.00485513	0.234151
16	48263282	ENSBTAG00000008126	NSYN	missense	P->L	0	221	6164	0.0173062	1.29683
16	52325688	SSU72	NSYN	missense	E->Q	0	3	6382	0.000234926	0.00929693
16	53263936	CASP9	SYN	matched neutral	-	16	520	5849	0.0432263	-0.368339
16	61601668	RALGPS2	NSYN	missense	G->E	0	22	6363	0.00172279	0.0728138
16	67767783	IVNS1ABP	NSYN	missense	P->T	0	58	6326	0.00454261	0.21628
16	68495980	HMCN1	SYN	matched neutral	-	17	514	5849	0.0429467	-0.506282
16	68673295	HMCN1	SYN	matched neutral	-	17	503	5865	0.0420517	-0.579179
16	70463459	CENPF	NSYN	missense	P->S	0	81	6304	0.00634299	0.324679
16	73441450	INTS7	SYN	matched neutral	-	9	487	5889	0.0395458	0.0849086
16	77508231	CD46	NSYN	missense	G->A	543	2668	3171	0.294108	0.110512
16	78157475	CRB1	NSYN	missense	E->K	21	630	5733	0.0526316	-0.230834
16	81041096	ENSBTAG00000047428	NSYN	missense	Q->H	0	38	6346	0.00297619	0.132741
16	81144597	ENSBTAG00000021874	NSYN	missense	L->P	18	771	5593	0.0632247	0.575415
17	6931192	ENSBTAG00000018546	NSYN	missense	S->T	229	1848	4306	0.180636	-0.50958
17	18332677	MGST2	LOF	frame-shift	DEL	0	13	6372	0.00101801	0.0417164
17	18363320	MGST2	NSYN	missense	G->E	65	1204	5115	0.10448	0.16347
17	25493410	PCDH10	NSYN	missense	A->S	0	4	6380	0.000313283	0.0124405
17	28835061	ACTR3	NSYN	missense	G->R	36	964	5383	0.0811531	0.302605
17	32748269	ENSBTAG00000003345	NSYN	missense	D->N	27	921	5436	0.0763628	0.675211
17	32885405	ENSBTAG00000003345	NSYN	missense	A->V	0	1	6384	7.83085e-05	0.00307724
17	33528025	ANKRD50	SYN	matched neutral	-	4	290	6090	0.0233396	-0.0723249
17	38027074	FSTL5	NSYN	missense	T->M	1	287	6097	0.0226312	0.526639
17	38027116	FSTL5	NSYN	missense	T->S	40	1015	5328	0.0857747	0.337826
17	40490657	RAPGEF2	NSYN	missense	R->W	3	438	5942	0.0347799	0.770678
17	40497015	RAPGEF2	SYN	matched neutral	-	18	530	5837	0.0443226	-0.513985
17	41085512	ENSBTAG00000011970	SYN	matched neutral	-	22	551	5812	0.0465936	-0.811585
17	41691109	TMEM144	NSYN	missense	T->I	0	91	6294	0.00712608	0.376076
17	41770751	FAM198B	NSYN	missense	S->G	1	161	6223	0.0127643	0.00985285
17	46066239	EP400	NSYN	missense	A->V	1	197	6185	0.0155883	0.132105
17	46086575	EP400	NSYN	missense	R->C	8	431	5945	0.0350094	-0.0155881
17	52566493	ENSBTAG00000006626	NSYN	missense	P->L	1	190	6194	0.0150352	0.106669
17	54629136	MPHOSPH9	SYN	matched neutral	-	6	401	5978	0.0323414	0.0705462
17	54834838	ABCB9	SYN	matched neutral	-	17	627	5740	0.0517701	0.006581
17	57656858	ACAD10	NSYN	missense	R->W	1	224	6159	0.0177005	0.236931
17	59393508	VSIG10	LOF	frame-shift	DEL	2	194	6189	0.0155051	-0.0969635
17	59736615	KSR2	NSYN	missense	P->L	2	223	6159	0.0177788	0.00310299
17	63471107	C17H12orf52	NSYN	missense	P->A	0	4	6381	0.000313234	0.0124395
17	63535434	ENSBTAG00000011102	SYN	matched neutral	-	10	455	5919	0.0372024	-0.104542
17	64370993	NAA25	NSYN	missense	I->M	1	265	6119	0.0209084	0.418209
17	64767707	ENSBTAG00000017379	NSYN	missense	T->A	0	0	6383	0	0
17	64885973	SIRT4	SYN	matched neutral	-	0	151	6234	0.0118246	0.741223
17	65563681	GIT2	NSYN	missense	V->I	7	561	5817	0.0450274	0.699558
17	65983910	ENSBTAG00000002695	NSYN	missense	R->W	2	333	6048	0.0263982	0.447847
17	68460650	TPST2	NSYN	missense	P->S	13	526	5842	0.0432534	-0.0808202
17	70572501	ENSBTAG00000009773	NSYN	missense	A->V	0	0	6385	0	0
17	71453576	GATL3	LOF	frame-shift	DEL	0	84	6254	0.0066267	0.341406
17	71534614	ENSBTAG00000003394	NSYN	missense	A->V	3	335	6046	0.0267074	0.234548
17	73251707	SLC2A11	NSYN	missense	M->R	1	385	6000	0.0303007	1.1053
17	73894854	LOC531152	LOF	nonsense	R->*	54	1147	5164	0.098586	0.329954
17	74290206	ENSBTAG00000045548	SYN	matched neutral	-	53	1122	5208	0.096193	0.245306
17	74364316	P2RX6	LOF	frame-shift	DEL	4	264	6106	0.0213367	-0.176215
17	74988075	DGCR8	NSYN	missense	A->V	0	7	6378	0.00054816	0.021999
18	1685157	FUK	NSYN	missense	G->R	0	93	6292	0.00728269	0.386671
18	1871209	MRCL	NSYN	missense	A->T	7	329	6048	0.026864	-0.333271
18	2005810	GLG1	NSYN	missense	R->H	1	125	6248	0.00996235	-0.117183
18	2965875	KARS	NSYN	missense	P->L	1	130	6254	0.0103367	-0.0972774
18	3676541	CNTNAP4	NSYN	missense	A->T	29	863	5493	0.0721222	0.22452
18	4579714	ADAMTS18	SYN	matched neutral	-	20	753	5612	0.0620987	0.305354
18	13988601	ENSBTAG00000020944	NSYN	missense	L->I	1	106	6278	0.00845732	-0.204902
18	14594877	CHMP1A	NSYN	missense	A->T	39	1067	5278	0.0896773	0.69548
18	14669425	FANCA	NSYN	missense	A->V	3	433	5949	0.0343774	0.739664
18	15386468	GPT2	NSYN	missense	G->S	8	421	5956	0.0342208	-0.0488481
18	18811081	BRD7	SYN	matched neutral	-	9	495	5881	0.0401723	0.114176
18	22354180	FTO	NSYN	missense	P->L	45	982	5358	0.0839468	-0.000166523
18	25152844	ENSBTAG00000005413	NSYN	missense	S->C	0	111	6274	0.00869225	0.486834
18	25179064	ENSBTAG00000005413	NSYN	missense	D->N	0	19	6366	0.00148786	0.062243
18	25717882	GPR56	NSYN	missense	F->V	9	453	5923	0.0368833	-0.0267492
18	34392999	TK2	LOF	frame-shift	INS	37	979	5364	0.0825235	0.322165
18	35126140	ENSBTAG00000038134	NSYN	missense	A->T	0	1	6382	7.83331e-05	0.00307772
18	35324727	ENSBTAG00000018900	NSYN	missense	T->I	17	525	5831	0.0438569	-0.437268
18	35335383	PARD6A	LOF	nonsense	R->*	11	531	5843	0.0433046	0.075746
18	36137338	CDH3	NSYN	missense	I->V	0	439	5946	0.0343774	3.9917
18	36140258	CDH3	NSYN	missense	K->R	0	70	6315	0.0054816	0.271143
18	36393077	ENSBTAG00000013941	NSYN	missense	E->V	0	438	5947	0.0342991	3.97588
18	36493435	CIRH1A	NSYN	missense	V->L	18	552	5814	0.0460526	-0.382807
18	36614707	TMED6	NSYN	missense	R->W	4	375	6006	0.0299922	0.232105
18	39530013	PHLPP2	NSYN	missense	R->Q	34	825	5524	0.0699514	-0.137042
18	43458366	SLC7A9	SYN	matched neutral	-	3	225	6156	0.0180921	-0.169999
18	44378414	CHST8	NSYN	missense	A->T	0	2	6382	0.000156642	0.00617668
18	45887657	ENSBTAG00000002370	NSYN	missense	G->E	2	221	6162	0.0176194	-0.00310738
18	46646459	U2AF1L4	NSYN	missense	L->S	31	711	5643	0.0605325	-0.539238
18	47143815	ENSBTAG00000038951	NSYN	missense	G->E	1	330	6054	0.0259984	0.761251
18	47467207	ENSBTAG00000040063	NSYN	missense	S->T	13	514	5856	0.0422999	-0.127071
18	48183675	ENSBTAG00000018225	NSYN	missense	A->V	1	23	6361	0.00195771	-1.00796
18	52504375	ZNF227	NSYN	missense	A->T	63	1090	5231	0.0952381	-0.194434
18	53330969	MARK4	NSYN	missense	K->M	71	1178	5134	0.1034	-0.0895293
18	55786965	FUT2	NSYN	missense	T->K	8	369	6008	0.0301488	-0.265923
18	55806054	MAMSTR	NSYN	missense	G->S	23	671	5690	0.056156	-0.18173
18	56916193	ENSBTAG00000002580	SYN	matched neutral	-	7	400	5978	0.0324197	-0.0280246
18	56971575	E1BJW6	LOF	frame-shift	INS	2	226	6156	0.0180138	0.0124335
18	57183884	SYT3	SYN	matched neutral	-	16	606	5763	0.0499608	-0.00385468
18	57338893	KLK1	SYN	matched neutral	-	16	591	5777	0.0487939	-0.0528711
18	57463825	KLK12	NSYN	missense	R->Q	3	343	6039	0.0273297	0.268968
18	61020844	ZNF331	NSYN	missense	R->W	19	596	5770	0.0496476	-0.241819
18	61091771	NLRP12	LOF	nonsense	R->*	78	1329	4976	0.116325	0.288654
18	62650752	HSPBP1	NSYN	missense	A->V	0	77	6307	0.0060307	0.30488
18	63619365	ENSBTAG00000006961	LOF	nonsense	Q->*	28	697	5658	0.0589848	-0.394837
18	65798749	ENSBTAG00000047405	NSYN	missense	A->V	0	2	6383	0.000156617	0.00617619
18	65925922	SLC27A5	NSYN	missense	A->V	0	0	6384	0	0
19	629492	CA10	NSYN	missense	R->C	1	213	6171	0.0168363	0.19275
19	9009703	VEZF1	NSYN	missense	S->T	1	180	6204	0.0142522	0.0718162
19	9518482	ENSBTAG00000046321	NSYN	missense	R->Q	387	2419	3577	0.250117	0.186326
19	9682883	MTMR4	NSYN	missense	V->I	1	197	6186	0.0155858	0.132048
19	11000608	VMP1	SYN	matched neutral	-	54	1230	5100	0.104793	0.812248
19	11417225	ENSBTAG00000012070	NSYN	missense	V->I	0	30	6355	0.00234926	0.10202
19	12330585	ENSBTAG00000002663	NSYN	missense	E->K	24	748	5612	0.0623434	0.0421646
19	12775112	ENSBTAG00000004489	NSYN	missense	R->C	0	19	6348	0.00149207	0.0623366
19	13249065	MRM1	NSYN	missense	A->P	0	1	6384	7.83085e-05	0.00307724
19	14151176	SYNRG	NSYN	missense	K->Q	99	1524	4762	0.134847	0.610328
19	18415469	ATAD5	NSYN	missense	D->N	1	120	6264	0.00955364	-0.139018
19	20448219	SLC46A1	NSYN	missense	G->S	2	339	6044	0.0268598	0.47795
19	20832510	DHRS13	NSYN	missense	V->L	3	237	6142	0.0190379	-0.119106
19	25322671	ZZEF1	NSYN	missense	G->S	20	663	5701	0.0550595	-0.0373681
19	25811631	SLC13A5	NSYN	missense	M->V	9	460	5916	0.0374315	-0.00443469
19	26969253	ZFP3	NSYN	missense	E->A	0	43	6342	0.00336727	0.152698
19	27456871	SLC16A13	NSYN	missense	L->P	5	569	5809	0.0453548	1.16151
19	27670852	ENSBTAG00000045892	SYN	matched neutral	-	3	511	5871	0.0404855	1.26988
19	27763982	CHRNB1	NSYN	missense	E->G	11	542	5832	0.044166	0.115827
19	27987572	TP53	NSYN	missense	L->V	2	289	6093	0.022948	0.244415
19	31175607	DNAH9	NSYN	missense	A->E	0	3	6380	0.000234999	0.0092984
19	33702315	ENSBTAG00000031071	NSYN	missense	I->V	2	153	6228	0.0122983	-0.287478
19	34024573	NCOR1	NSYN	missense	A->T	0	6	6379	0.000469851	0.0187905
19	34047903	ENSBTAG00000013270	NSYN	missense	A->V	1	157	6227	0.0124511	-0.00250059
19	34817999	SLC5A10	NSYN	missense	G->W	37	1146	5167	0.096063	1.50111
19	36539000	WFIKKN2	NSYN	missense	R->Q	7	617	5759	0.0494282	1.07774
19	36836290	ENSBTAG00000014355	SYN	matched neutral	-	4	446	5934	0.0355576	0.583742
19	39063410	NFE2L1	NSYN	missense	R->C	40	926	5418	0.0787907	-0.0145944
19	40301376	CACNB1	NSYN	missense	R->Q	59	1152	5173	0.0994674	0.150767
19	40303477	CACNB1	NSYN	missense	P->L	59	1151	5174	0.0993891	0.14676
19	41167545	WIPF2	NSYN	missense	A->V	0	1	6384	7.83085e-05	0.00307724
19	41305549	ENSBTAG00000019262	NSYN	missense	D->H	7	385	5990	0.0312598	-0.0798783
19	42723615	ACLY	NSYN	missense	R->C	10	572	5802	0.0463659	0.342527
19	42878750	DHX58	NSYN	missense	S->L	37	1008	5338	0.0847564	0.472394
19	43659979	RUNDC1	SYN	matched neutral	-	1	182	6202	0.0144088	0.0786626
19	43660995	RUNDC1	NSYN	missense	K->Q	1	182	6202	0.0144088	0.0786626
19	43947264	ARL4D	NSYN	missense	R->H	12	617	5755	0.0502036	0.34726
19	44700066	SLC4A1	NSYN	missense	P->A	5	314	6066	0.025372	-0.116864
19	45269138	KIF18B	LOF	splice-site	-	3	245	6137	0.0196554	-0.0880938
19	45458638	HEXIM2	NSYN	missense	A->T	0	26	6358	0.00203634	0.0872383
19	45974328	ENSBTAG00000002664	NSYN	missense	A->S	2	167	6216	0.0133908	-0.214883
19	46774968	ENSBTAG00000012564	NSYN	missense	I->F	244	2061	4079	0.19964	0.197613
19	47648799	TLK2	NSYN	missense	P->L	0	79	6306	0.00618637	0.314712
19	48512357	KCNH6	NSYN	missense	Q->K	6	459	5920	0.0368833	0.305888
19	48671192	CCDC47	NSYN	missense	R->Q	1	151	6233	0.0119812	-0.0215572
19	49799787	NOL11	SYN	matched neutral	-	7	558	5819	0.0447995	0.681443
19	50521576	TBCD	NSYN	missense	V->I	0	87	6298	0.00681284	0.355202
19	50786074	HEXDC	SYN	matched neutral	-	11	611	5763	0.0495693	0.425228
19	51838588	ENSBTAG00000019104	NSYN	missense	A->G	0	1	6384	7.83085e-05	0.00307724
19	52079617	ENSBTAG00000018271	NSYN	missense	A->V	19	841	5522	0.0688656	0.924335
19	54161752	ENSBTAG00000021505	SYN	matched neutral	-	16	628	5741	0.0516836	0.0680934
19	57267515	ENSBTAG00000011387	NSYN	missense	P->A	0	49	6336	0.00383712	0.17746
19	57721367	BTBD17	LOF	splice-site	-	0	6	6285	0.000476872	0.0189333
19	58651023	ENSBTAG00000006089	NSYN	missense	A->V	0	4	6381	0.000313234	0.0124395
19	58655834	ENSBTAG00000006089	NSYN	missense	R->W	100	1447	4838	0.128974	0.177599
19	58656094	ENSBTAG00000006089	NSYN	missense	P->L	100	1447	4837	0.128994	0.178141
19	61966703	ENSBTAG00000006937	LOF	nonsense	S->*	1	60	6324	0.00485513	-0.513111
19	62223357	MGC134105	NSYN	missense	R->H	0	63	6322	0.00493344	0.238686
19	62395507	ARSG	NSYN	missense	E->K	281	2267	3836	0.22157	0.752162
20	437339	SLIT3	NSYN	missense	I->M	1	70	6314	0.00563821	-0.42971
20	4914052	STC2	NSYN	missense	R->Q	5	312	6068	0.0252153	-0.124862
20	8507311	ENSBTAG00000017545	NSYN	missense	R->W	0	86	6297	0.00673664	0.350119
20	8667722	TNPO1	SYN	matched neutral	-	4	414	5967	0.0330462	0.413084
20	10054908	SMN1	NSYN	missense	E->G	2	199	6184	0.0158966	-0.0779292
20	10072154	ENSBTAG00000003326	NSYN	missense	C->S	0	59	6322	0.0046231	0.220777
20	11345725	PIK3R1	SYN	matched neutral	-	1	158	6226	0.0125294	0.000575601
20	13404838	SREK1	NSYN	missense	K->T	47	951	5387	0.0818324	-0.18675
20	13500773	ERBB2IP	NSYN	missense	S->C	5	352	6028	0.0283477	0.0144638
20	22333492	ENSBTAG00000013426	NSYN	missense	R->H	14	513	5858	0.0423649	-0.216193
20	23877386	DHX29	SYN	matched neutral	-	16	665	5704	0.054581	0.211894
20	26143601	ENSBTAG00000016525	SYN	matched neutral	-	1	164	6220	0.0129992	0.0192677
20	28721896	ENSBTAG00000044010	NSYN	missense	S->T	16	589	5780	0.0486296	-0.0600153
20	31324192	C20H5orf34	NSYN	missense	R->H	14	650	5721	0.0530932	0.312227
20	35521538	OSMR	NSYN	missense	P->S	0	34	6351	0.00266249	0.117185
20	37105338	ENSBTAG00000000586	NSYN	missense	A->V	4	295	6085	0.0237312	-0.0544664
20	37120758	ENSBTAG00000000586	NSYN	missense	G->E	4	295	6086	0.0237275	-0.0545495
20	39193377	AGXT2	SYN	matched neutral	-	9	389	5986	0.0318766	-0.292552
20	40250052	ADAMTS12	NSYN	missense	T->M	13	590	5781	0.0482456	0.138424
20	41321954	ENSBTAG00000008414	SYN	matched neutral	-	35	1139	5211	0.094675	1.61083
20	56537946	MYO10	NSYN	missense	L->F	197	1965	4223	0.18473	0.521598
20	59507894	ENSBTAG00000021972	SYN	matched neutral	-	1	179	6205	0.0141738	0.0684163
20	65435031	MTRR	NSYN	missense	A->S	1	238	6146	0.018794	0.295768
20	65435035	MTRR	SYN	matched neutral	-	1	238	6145	0.018797	0.295849
20	65470102	FASTKD3	NSYN	missense	I->T	1	238	6146	0.018794	0.295768
20	71289929	ENSBTAG00000012559	NSYN	missense	A->V	0	0	6384	0	0
21	5820742	ENSBTAG00000009125	SYN	matched neutral	-	7	492	5886	0.0396241	0.323767
21	7769672	SYNM	NSYN	missense	A->V	0	1	6384	7.83085e-05	0.00307724
21	21476589	ENSBTAG00000002418	NSYN	missense	E->V	58	1132	5193	0.0977597	0.106216
21	22713243	ZSCAN2	NSYN	missense	T->M	389	2461	3534	0.253681	0.36949
21	22905071	ENSBTAG00000001618	NSYN	missense	K->N	40	989	5355	0.0837249	0.216246
21	24427358	ENSBTAG00000003410	NSYN	missense	W->R	3	251	6129	0.0201316	-0.0657934
21	24597170	ENSBTAG00000004645	SYN	matched neutral	-	7	520	5855	0.0418364	0.465062
21	25404043	TM6SF1	NSYN	missense	D->H	0	7	6378	0.00054816	0.021999
21	27606413	IL16	NSYN	missense	A->P	6	367	6012	0.0296789	-0.0401494
21	33598293	CSPG4	NSYN	missense	P->A	0	3	6382	0.000234926	0.00929693
21	33609133	CSPG4	SYN	matched neutral	-	2	294	6087	0.0233433	0.265899
21	35035249	STOML1	NSYN	missense	A->G	125	1470	4790	0.134691	-0.260887
21	42299530	ENSBTAG00000022847	SYN	matched neutral	-	16	636	5721	0.0524086	0.0990307
21	42940542	ENSBTAG00000027024	NSYN	missense	N->S	36	778	5571	0.0665623	-0.488992
21	43350082	AKAP6	NSYN	missense	S->Y	4	362	6016	0.0289878	0.17863
21	49617947	PNN	NSYN	missense	R->Q	29	919	5437	0.0765074	0.506043
21	58424517	C21H14orf142	NSYN	missense	R->W	43	1117	5223	0.0942347	0.750615
21	59289410	LOC514011	LOF	nonsense	S->*	0	28	6354	0.00219367	0.094603
21	59794165	SERPINA5	NSYN	missense	A->T	2	229	6154	0.0182459	0.0218605
21	61517283	DICER1	NSYN	missense	R->W	2	350	6033	0.0277212	0.53528
21	61549075	DICER1	NSYN	missense	C->Y	3	261	6121	0.0209084	-0.0313128
21	66549239	ENSBTAG00000013491	NSYN	missense	L->S	3	356	6026	0.0283477	0.327622
21	68909413	ANKRD9	NSYN	missense	D->H	1	185	6190	0.0146644	0.0895083
21	69767128	ENSBTAG00000013410	NSYN	missense	S->N	0	59	6326	0.0046202	0.220695
21	69845112	BAG5	SYN	matched neutral	-	1	118	6266	0.00939702	-0.147869
22	372881	PGAM2	NSYN	missense	P->L	96	1142	5146	0.10448	-1.46823
22	943558	ENSBTAG00000011628	SYN	matched neutral	-	13	532	5839	0.043703	-0.0597485
22	2780703	AZI2	SYN	matched neutral	-	14	473	5898	0.0392326	-0.424543
22	10888477	GOLGA4	NSYN	missense	K->Q	3	315	6067	0.025137	0.153286
22	12474108	GORASP1	NSYN	missense	A->T	14	656	5714	0.0535714	0.341423
22	12521657	CSRNP1	NSYN	missense	E->D	75	1175	5134	0.103775	-0.223697
22	12551088	XIRP1	NSYN	missense	G->R	75	1171	5139	0.103446	-0.242618
22	16783605	FANCD2	SYN	matched neutral	-	15	650	5720	0.0532498	0.225993
22	16997370	CAMK1	NSYN	missense	R->Q	0	25	6360	0.00195771	0.0835919
22	21796313	ITPR1	SYN	matched neutral	-	81	1095	5207	0.0984647	-1.00306
22	22576971	LRRN1	NSYN	missense	G->R	0	54	6330	0.00422932	0.198786
22	32635923	TMF1	NSYN	missense	E->G	236	2118	4030	0.202851	0.644898
22	36019460	ENSBTAG00000010581	NSYN	missense	S->T	3	242	6138	0.0194266	-0.0994265
22	37748248	C3orf49	LOF	frame-shift	DEL	99	1394	4890	0.124706	0.00665069
22	38974503	CADPS	NSYN	missense	Q->R	20	537	5828	0.045184	-0.686449
22	43050943	ENSBTAG00000020373	NSYN	missense	Q->E	0	14	6371	0.00109632	0.0450809
22	44545937	IL17RD	NSYN	missense	M->L	12	610	5762	0.0496554	0.313494
22	44547309	IL17RD	NSYN	missense	K->T	12	609	5764	0.0495693	0.308523
22	47605137	ACTR8	NSYN	missense	D->N	3	242	6140	0.0194205	-0.099577
22	48408559	RFT1	LOF	frame-shift	DEL	0	22	6363	0.00172279	0.0728138
22	48773088	ENSBTAG00000014786	NSYN	missense	R->Q	0	12	6371	0.000939997	0.0383806
22	48900922	STAB1	NSYN	missense	G->R	9	446	5930	0.0363352	-0.0502802
22	51626798	SLC25A20	NSYN	missense	T->A	9	562	5814	0.045419	0.411234
22	51880735	ENSBTAG00000019081	NSYN	missense	T->I	0	26	6359	0.00203602	0.0872309
22	51989195	A5D7S1	LOF	frame-shift	INS	0	257	6127	0.0201284	1.63966
22	52955445	E1B715	LOF	frame-shift	INS	0	23	6362	0.0018011	0.0763834
22	53978266	ENSBTAG00000015698	NSYN	missense	A->T	0	11	6373	0.000861529	0.0350575
22	56530642	TRH	NSYN	missense	R->P	35	949	5401	0.0797964	0.284721
22	57385269	PPARG	SYN	matched neutral	-	7	368	6010	0.0299139	-0.146829
22	57951489	NR2C2	NSYN	missense	R->S	18	641	5726	0.0530149	-0.0031645
22	59206373	NUP210	NSYN	missense	H->Y	1	60	6324	0.00485513	-0.513111
22	59548506	IQSEC1	SYN	matched neutral	-	10	492	5876	0.040138	0.021676
22	59604971	ACAD9	NSYN	missense	A->V	2	315	6067	0.0249843	0.360416
23	3498589	ENSBTAG00000021237	NSYN	missense	G->V	7	480	5898	0.0386844	0.268432
23	4022609	ENSBTAG00000033515	NSYN	missense	V->I	7	481	5897	0.0387627	0.272931
23	7527462	KIFC1	NSYN	missense	A->V	2	241	6142	0.0191856	0.0613452
23	7751858	ITPR3	SYN	matched neutral	-	28	813	5544	0.0680501	0.0774581
23	9353657	A4IFL4	LOF	frame-shift	DEL	0	1	6383	7.83208e-05	0.00307748
23	12964669	SAYSD1	NSYN	missense	A->T	20	761	5604	0.0627251	0.344123
23	15126744	ENSBTAG00000015707	NSYN	missense	L->I	67	1081	5237	0.0951449	-0.39593
23	15610070	TOMM6	NSYN	missense	L->F	66	1070	5248	0.0941416	-0.413273
23	15893019	MGC137036	NSYN	missense	V->M	21	835	5529	0.0686766	0.67162
23	16482227	GLTSCR1L	NSYN	missense	D->N	0	67	6318	0.00524667	0.257081
23	16482323	GLTSCR1L	NSYN	missense	A->T	3	321	6061	0.0256069	0.176855
23	17115879	POLH	NSYN	missense	N->H	7	300	6078	0.0245889	-0.507463
23	19388889	ENPP5	NSYN	missense	S->N	9	539	5837	0.0436179	0.298681
23	19844603	CYP39A1	NSYN	missense	E->K	14	418	5952	0.0349311	-0.803374
23	19897938	TDRD6	NSYN	missense	E->Q	9	536	5840	0.0433829	0.284821
23	19898565	TDRD6	NSYN	missense	R->W	64	1164	5155	0.101206	0.0442345
23	22095739	RHAG	NSYN	missense	S->F	4	269	6112	0.0216915	-0.155447
23	22222002	PGK2	NSYN	missense	S->N	22	650	5708	0.0543887	-0.207978
23	23837815	ENSBTAG00000011237	NSYN	missense	T->I	0	152	6233	0.0119029	0.748157
23	26689754	ENSBTAG00000046116	NSYN	missense	R->S	0	176	6209	0.0137823	0.923201
23	26793792	ENSBTAG00000023541	NSYN	missense	P->S	45	1080	5259	0.0916353	0.40825
23	26974427	NOTCH4	NSYN	missense	T->N	241	2051	4019	0.200681	0.261339
23	27274633	ENSBTAG00000032031	SYN	matched neutral	-	11	415	5959	0.0342208	-0.403784
23	27294617	SLC44A4	LOF	splice-site	-	0	1	6382	7.83331e-05	0.00307772
23	27336557	HSPA1L	NSYN	missense	A->T	23	844	5518	0.0696946	0.545239
23	27361441	VWA7	LOF	nonsense	R->*	0	60	6325	0.00469851	0.225155
23	27481609	PRRC2A	NSYN	missense	A->T	513	2594	3277	0.283521	0.0019621
23	27785612	CCHCR1	NSYN	missense	L->F	0	33	6323	0.00259597	0.113645
23	28120504	ENSBTAG00000025526	NSYN	missense	A->V	0	68	6317	0.00532498	0.261743
23	28121423	ENSBTAG00000025526	NSYN	missense	Q->K	0	72	6313	0.00563821	0.280645
23	28122759	ENSBTAG00000025526	NSYN	missense	A->E	0	70	6315	0.0054816	0.271143
23	28304942	LOC512672	SYN	matched neutral	-	0	72	6313	0.00563821	0.280645
23	28676268	ENSBTAG00000004490	NSYN	missense	F->L	0	179	6202	0.014026	0.946687
23	28739406	ENSBTAG00000017836	SYN	matched neutral	-	0	67	6318	0.00524667	0.257081
23	28950781	ENSBTAG00000045586	LOF	nonsense	R->*	0	66	6319	0.00516836	0.252444
23	29910249	TRIM27	SYN	matched neutral	-	2	242	6141	0.0192639	0.0647479
23	30061315	ENSBTAG00000038782	NSYN	missense	G->R	0	68	6317	0.00532498	0.261743
23	30123284	ZNF323	NSYN	missense	H->Y	1	173	6211	0.013704	0.048341
23	30135215	ENSBTAG00000046573	NSYN	missense	E->K	0	64	6321	0.00501175	0.243247
23	30162018	ZSCAN26	NSYN	missense	A->V	1	238	6146	0.018794	0.295768
23	30166287	ZSCAN26	NSYN	missense	L->M	112	1468	4805	0.132498	0.00218524
23	30190545	ENSBTAG00000003575	NSYN	missense	G->W	0	152	6233	0.0119029	0.748157
23	30207289	ENSBTAG00000040168	NSYN	missense	P->S	0	63	6321	0.00493421	0.238709
23	30211732	ENSBTAG00000040168	NSYN	missense	S->F	0	64	6321	0.00501175	0.243247
23	30266310	ZNF389	NSYN	missense	E->K	1	227	6156	0.0179355	0.249294
23	30279886	ZNF192	SYN	matched neutral	-	35	919	5431	0.0774471	0.154074
23	30333296	ZNF165	NSYN	missense	S->I	0	64	6321	0.00501175	0.243247
23	30995501	A6QPV7	LOF	frame-shift	DEL	49	1021	5315	0.0876273	0.000965346
23	30995504	A6QPV7	LOF	frame-shift	DEL	49	1021	5315	0.0876273	0.000965346
23	31637446	HIST1H1C	NSYN	missense	T->I	1	170	6214	0.0134691	0.0385116
23	31693882	TRIM38	NSYN	missense	E->V	1	243	6140	0.0191886	0.317647
23	31775910	SLC17A3	NSYN	missense	I->M	98	1351	4933	0.1212	-0.121381
23	31988504	SCGN	SYN	matched neutral	-	3	281	6101	0.0224745	0.0322118
23	32082536	LRRC16A	SYN	matched neutral	-	12	452	5921	0.0372749	-0.318036
23	32999632	GPLD1	NSYN	missense	P->S	8	411	5966	0.0334377	-0.0845794
23	33246742	DCDC2	LOF	frame-shift	DEL	4	219	6160	0.0177816	-0.414601
23	34719645	PRP9	LOF	nonsense	S->*	1	19	6361	0.00164551	-1.09979
23	39581921	NUP153	NSYN	missense	T->A	0	0	6385	0	0
23	39581982	NUP153	NSYN	missense	A->V	0	154	6231	0.0120595	0.762113
23	44175889	ENSBTAG00000001252	NSYN	missense	P->S	15	664	5704	0.0543632	0.28953
23	44980669	NEDD9	NSYN	missense	D->N	1	103	6280	0.00822368	-0.22026
23	47654619	ENSBTAG00000001123	NSYN	missense	E->K	0	221	6164	0.0173062	1.29683
23	47673190	DSP	SYN	matched neutral	-	4	305	6075	0.0245144	-0.0207942
23	47673635	DSP	NSYN	missense	R->Q	20	583	5781	0.0487939	-0.391579
23	49966402	PRPF4B	SYN	matched neutral	-	10	610	5765	0.0493344	0.542299
24	730060	RBFA	NSYN	missense	D->N	104	1484	4794	0.13256	0.237657
24	4274685	CNDP2	NSYN	missense	A->V	0	13	6350	0.00102153	0.0417917
24	5457612	NETO1	NSYN	missense	C->F	0	49	6336	0.00383712	0.17746
24	20692377	FHOD3	NSYN	missense	V->M	33	784	5565	0.0665935	-0.265925
24	22538588	DTNA	NSYN	missense	R->Q	0	13	6372	0.00101801	0.0417164
24	23742486	ENSBTAG00000047003	NSYN	missense	A->V	4	175	6206	0.0143305	-0.73755
24	23810823	ENSBTAG00000047003	NSYN	missense	L->W	4	165	6216	0.0135474	-0.82706
24	23858151	ENSBTAG00000047003	NSYN	missense	A->S	1	37	6347	0.00305403	-0.768843
24	25613720	ENSBTAG00000007696	NSYN	missense	A->S	31	824	5530	0.0693814	-0.0118396
24	29198279	CDH2	SYN	matched neutral	-	6	300	6078	0.0244361	-0.332609
24	30782753	KCTD1	NSYN	missense	V->I	10	456	5917	0.0372865	-0.100571
24	33489593	C24H18orf8	NSYN	missense	F->L	3	237	6145	0.019029	-0.119336
24	37725387	MYOM1	NSYN	missense	T->M	323	2210	3852	0.223649	-0.0539967
24	39318313	EPB41L3	SYN	matched neutral	-	0	115	6268	0.0090083	0.510387
24	40407800	ENSBTAG00000018160	NSYN	missense	D->N	63	1125	5197	0.097964	-0.0573715
24	41961897	ENSBTAG00000002755	SYN	matched neutral	-	1	129	6255	0.0102584	-0.101272
24	41963670	ENSBTAG00000002755	SYN	matched neutral	-	10	510	5865	0.0415035	0.0816201
24	43687095	ENSBTAG00000013380	SYN	matched neutral	-	1	255	6129	0.0201253	0.371499
24	46152228	ENSBTAG00000012067	NSYN	missense	L->F	1	98	6286	0.00783085	-0.247098
24	47015215	ENSBTAG00000007833	SYN	matched neutral	-	17	466	5901	0.0391604	-0.853174
24	49976550	ENSBTAG00000019455	NSYN	missense	E->K	23	826	5534	0.0683064	0.445151
24	50446217	SKA1	NSYN	missense	E->K	4	320	6058	0.0256973	0.0265879
24	59808509	ENSBTAG00000000531	NSYN	missense	F->L	229	1933	4220	0.187324	-0.0922786
24	62601737	SERPINB2	NSYN	missense	A->V	187	1925	4272	0.18006	0.508116
25	587071	ENSBTAG00000033677	NSYN	missense	A->S	0	27	6354	0.00211566	0.0909242
25	627119	HAGHL	NSYN	missense	A->S	2	376	6005	0.0297666	0.679656
25	967732	ENSBTAG00000026461	NSYN	missense	R->H	36	932	5414	0.0786587	0.161472
25	1641820	ENSBTAG00000020619	NSYN	missense	V->A	0	2	6382	0.000156642	0.00617668
25	2841135	ZNF174	NSYN	missense	S->R	84	1358	4942	0.119518	0.231556
25	2960593	ENSBTAG00000004509	NSYN	missense	T->I	0	89	6296	0.00696946	0.365586
25	3088847	CREBBP	NSYN	missense	M->V	6	344	6035	0.0278778	-0.125079
25	3745114	UBALD1	NSYN	missense	H->Q	320	2217	3847	0.223763	-0.00502285
25	7770415	ENSBTAG00000005455	SYN	matched neutral	-	18	682	5685	0.0562255	0.139275
25	10599642	RSL1D1	NSYN	missense	E->D	1	79	6304	0.00634398	-0.363946
25	10638614	GSPT1	NSYN	missense	S->F	5	408	5970	0.0327432	0.22157
25	11495704	CPPED1	NSYN	missense	Y->C	0	132	6253	0.0103367	0.614831
25	13269810	MKL2	NSYN	missense	R->Q	20	592	5773	0.049491	-0.342595
25	13269946	MKL2	SYN	matched neutral	-	20	592	5773	0.049491	-0.342595
25	13658221	BFAR	LOF	nonsense	W->*	0	15	6370	0.00117463	0.048468
25	13674216	ENSBTAG00000021522	NSYN	missense	A->S	7	296	6081	0.0242794	-0.53398
25	18830374	LYRM1	SYN	matched neutral	-	1	283	6101	0.0223179	0.506343
25	20412998	ENSBTAG00000018870	NSYN	missense	S->Y	18	620	5747	0.0513704	-0.0734489
25	21460710	ENSBTAG00000045593	NSYN	missense	R->Q	4	226	6155	0.0183242	-0.37249
25	22713803	ENSBTAG00000017999	NSYN	missense	N->D	0	15	6370	0.00117463	0.048468
25	25497026	ENSBTAG00000006129	NSYN	missense	L->F	0	12	6373	0.000939702	0.0383743
25	26200979	ATP2A1	NSYN	missense	R->W	139	1560	4684	0.143976	-0.167262
25	26617889	ASPHD1	NSYN	missense	V->M	80	1171	5117	0.104507	-0.415446
25	26673393	MVP	NSYN	missense	S->N	0	21	6364	0.00164448	0.0692673
25	27362696	SETD1A	NSYN	missense	E->A	92	1419	4873	0.125548	0.272455
25	27434355	ZNF668	SYN	matched neutral	-	28	775	5581	0.0650846	-0.0473018
25	27486073	PRSS8	NSYN	missense	P->S	16	687	5682	0.0563038	0.311412
25	28469022	KCTD7	SYN	matched neutral	-	2	266	6117	0.0211433	0.151623
25	28647161	TYW1	NSYN	missense	V->M	117	1534	4731	0.138515	0.140683
25	33197667	WBSCR16	NSYN	missense	R->W	1	56	6328	0.0045419	-0.550219
25	33710411	EIF4H	SYN	matched neutral	-	1	248	6136	0.0195771	0.339756
25	34642052	ENSBTAG00000005089	NSYN	missense	S->T	0	44	6341	0.00344558	0.156764
25	35037688	UPK3BL	LOF	nonsense	Q->*	1	121	6263	0.00963195	-0.134658
25	36314295	SRRT	SYN	matched neutral	-	25	851	5509	0.070556	0.425522
25	36776654	GPC2	LOF	nonsense	R->*	0	30	6354	0.00234962	0.102029
25	36782914	GAL3ST4	NSYN	missense	A->T	34	830	5520	0.0703321	-0.117506
25	36878947	TAF6	NSYN	missense	P->A	136	1613	4635	0.147635	0.0714823
25	37347042	ENSBTAG00000039512	NSYN	missense	A->T	0	22	6363	0.00172279	0.0728138
25	37393392	ZNF655	NSYN	missense	G->S	0	63	6322	0.00493344	0.238686
25	37785509	ENSBTAG00000007118	NSYN	missense	T->M	7	562	5815	0.0451128	0.706007
25	37797296	ENSBTAG00000007118	NSYN	missense	L->R	0	117	6268	0.0091621	0.522167
25	38589940	ANKRD61	NSYN	missense	G->E	660	2859	2865	0.327303	0.308199
25	41529894	FTSJ2	NSYN	missense	A->S	0	0	6385	0	0
26	5503759	ENSBTAG00000045905	NSYN	missense	G->A	0	26	6359	0.00203602	0.0872309
26	6344919	MBL2	NSYN	missense	P->Q	13	710	5661	0.0576441	0.760767
26	6855632	DKK1	NSYN	missense	T->S	31	973	5379	0.0810747	0.681503
26	7819117	PRKG1	SYN	matched neutral	-	3	253	6127	0.0202883	-0.0586437
26	9173894	MINPP1	NSYN	missense	K->Q	15	590	5775	0.0485893	0.00398375
26	13542695	ENSBTAG00000016104	NSYN	missense	A->V	1	219	6163	0.0173116	0.216711
26	14767679	MYOF	NSYN	missense	L->F	0	25	6359	0.00195802	0.083599
26	15508445	PLCE1	SYN	matched neutral	-	5	330	6050	0.0266249	-0.0570448
26	17244154	ENSBTAG00000039132	SYN	matched neutral	-	4	290	6091	0.0233359	-0.0724099
26	19377271	HPS1	NSYN	missense	M->T	246	1832	4306	0.182018	-1.01699
26	20891370	LOC511498	NSYN	missense	R->C	20	755	5609	0.062265	0.315211
26	21709451	LZTS2	NSYN	missense	R->W	71	1288	5017	0.112139	0.340168
26	21729347	ENSBTAG00000016928	NSYN	missense	R->W	9	534	5842	0.0432263	0.275686
26	22593403	ENSBTAG00000013120	NSYN	missense	G->S	4	315	6066	0.0252937	0.0104584
26	22684103	PPRC1	NSYN	missense	P->S	220	2063	4098	0.196129	0.632156
26	24673652	ASMTL	NSYN	missense	G->R	2	292	6087	0.0231939	0.257491
26	35044883	ENSBTAG00000006860	NSYN	missense	T->M	2	295	6088	0.0234143	0.270026
26	35592283	FAM160B1	SYN	matched neutral	-	7	362	6016	0.029444	-0.172353
26	37398622	ENSBTAG00000013779	NSYN	missense	I->R	1	27	6357	0.00227095	-0.928877
26	37592849	ENO4	SYN	matched neutral	-	5	334	6045	0.0269424	-0.0431077
26	37942540	PDZD8	NSYN	missense	S->F	0	24	6361	0.0018794	0.0799761
26	40134864	BAG3	NSYN	missense	G->W	2	342	6041	0.0270948	0.493373
26	42447860	ENSBTAG00000010786	SYN	matched neutral	-	34	885	5466	0.074628	0.0696948
26	45779683	ZC3H14	NSYN	missense	S->T	63	1246	5076	0.107439	0.439879
26	45780056	ZC3H14	LOF	nonsense	R->*	19	655	5695	0.0544041	-0.0084897
26	45823857	FANK1	NSYN	missense	R->W	1302	3128	1953	0.449005	-0.131611
26	45888248	ADAM12	NSYN	missense	A->S	32	813	5539	0.0686873	-0.0915142
26	47870305	ENSBTAG00000002444	NSYN	missense	D->N	181	1788	4414	0.168416	0.000874982
26	51102295	ENSBTAG00000015651	NSYN	missense	F->C	0	35	6350	0.0027408	0.121035
27	5483614	EAP	LOF	frame-shift	DEL	0	46	6337	0.00360332	0.164999
27	12799970	ODZ3	SYN	matched neutral	-	18	771	5594	0.0632148	0.575043
27	14086836	CASP3	NSYN	missense	A->T	1	354	6029	0.0278822	0.905518
27	14156507	CCDC111	NSYN	missense	I->V	5	512	5867	0.0408835	0.769521
27	14236965	ACSL1	NSYN	missense	R->Q	121	1579	4685	0.1426	0.240176
27	14706484	ANR37	LOF	frame-shift	INS	13	585	5784	0.047869	0.11961
27	14706485	ANR37	LOF	frame-shift	INS	14	498	5764	0.0419057	-0.26573
27	15300686	FAM149A	SYN	matched neutral	-	5	216	6164	0.0176977	-0.681068
27	15584999	FAT1	NSYN	missense	G->R	1	201	6183	0.0158966	0.146804
27	15586372	FAT1	NSYN	missense	T->I	0	42	6343	0.00328896	0.148656
27	18794767	ENSBTAG00000010085	NSYN	missense	A->S	18	865	5502	0.070556	1.22906
27	19998896	MSR1	NSYN	missense	R->C	10	594	5780	0.048089	0.454574
27	24760270	TNKS	NSYN	missense	T->M	39	778	5567	0.0670426	-0.707274
27	26087455	ENSBTAG00000017083	NSYN	missense	V->I	123	1409	4852	0.129621	-0.538294
27	26294807	WRN	LOF	nonsense	Q->*	0	44	6341	0.00344558	0.156764
27	36108644	GOLGA7	NSYN	missense	K->R	10	381	5993	0.0314066	-0.472831
28	3787068	TTC13	NSYN	missense	H->R	19	733	5631	0.0603948	0.287353
28	5714217	MAP10	NSYN	missense	V->A	0	0	6385	0	0
28	6260252	ENSBTAG00000021183	SYN	matched neutral	-	8	271	6106	0.0224745	-0.942222
28	6559127	KCNK1	NSYN	missense	T->M	8	269	6108	0.0223179	-0.960701
28	7292299	ENSBTAG00000004517	NSYN	missense	E->A	0	11	6374	0.000861394	0.0350547
28	9255465	ENSBTAG00000044100	NSYN	missense	T->S	1	203	6181	0.0160532	0.154305
28	10236807	ENSBTAG00000022886	NSYN	missense	A->T	33	744	5608	0.0634299	-0.484483
28	14362690	ENSBTAG00000010694	NSYN	missense	A->V	0	3	6382	0.000234926	0.00929693
28	15430018	ENSBTAG00000019792	NSYN	missense	K->N	0	122	6263	0.00955364	0.552365
28	17415511	TMEM26	NSYN	missense	W->R	31	784	5569	0.0662594	-0.157589
28	18036396	ENSBTAG00000006729	NSYN	missense	T->I	837	2855	2693	0.354659	-0.433143
28	24876331	PBLD	NSYN	missense	K->N	1	189	6195	0.0149569	0.103113
28	28311809	SPOCK2	NSYN	missense	D->N	2	234	6149	0.0186374	0.0380104
28	29428286	FAM149B1	NSYN	missense	A->V	1	247	6138	0.0194958	0.335199
28	29579361	ZMYND17	NSYN	missense	A->E	11	603	5771	0.0489428	0.384145
28	29967600	PLAU	NSYN	missense	A->T	0	2	6383	0.000156617	0.00617619
28	32827195	KCNMA1	NSYN	missense	R->Q	4	223	6155	0.0180978	-0.390039
28	35824055	SFTPD	NSYN	missense	T->M	44	1066	5269	0.090453	0.389356
28	42093764	ENSBTAG00000019194	NSYN	missense	T->A	0	10	6375	0.000783085	0.0317574
28	42138996	GPRIN2	NSYN	missense	S->F	8	464	5873	0.0378251	0.0990528
28	42616085	GDF2	NSYN	missense	L->Q	7	272	6106	0.0223962	-0.70933
28	44422070	NCOA4	SYN	matched neutral	-	1	78	6290	0.00628042	-0.370217
28	44588203	ENSBTAG00000006719	NSYN	missense	K->N	0	65	6319	0.00509085	0.247856
29	1094222	ENSBTAG00000001902	NSYN	missense	E->K	12	640	5733	0.0519969	0.465409
29	2078681	FAT3	NSYN	missense	P->H	0	164	6221	0.0128426	0.833606
29	2079171	FAT3	NSYN	missense	H->Y	0	173	6212	0.0135474	0.900411
29	9910593	SYTL2	LOF	nonsense	R->*	4	391	5990	0.0312451	0.302805
29	17974794	KCTD21	LOF	nonsense	R->*	1	155	6229	0.0122944	-0.00873656
29	25957647	E2F8	NSYN	missense	I->S	2	171	6212	0.013704	-0.195662
29	26844262	OR4D5	NSYN	missense	R->W	2	132	6251	0.01065	-0.41501
29	28722043	ROBO4	NSYN	missense	P->L	447	2355	3581	0.254504	-0.632195
29	30063436	DCPS	NSYN	missense	V->M	55	1195	5122	0.102401	0.538911
29	36712276	PRDM10	SYN	matched neutral	-	1	273	6111	0.0215348	0.456734
29	36807234	ZNF740	NSYN	missense	L->R	46	1096	5239	0.0930889	0.443007
29	36807643	ZNF740	LOF	nonsense	Y->*	47	1096	5238	0.0932456	0.3912
29	37115541	ADAMTS8	NSYN	missense	E->D	0	22	6363	0.00172279	0.0728138
29	40880664	DAGLA	SYN	matched neutral	-	6	609	5750	0.0487824	1.23752
29	41590147	ENSBTAG00000013468	NSYN	missense	A->V	0	31	6354	0.00242756	0.105776
29	41682390	INTS5	NSYN	missense	L->R	0	30	6355	0.00234926	0.10202
29	43152083	TRPT1	LOF	nonsense	Q->*	2	238	6145	0.0189507	0.0512409
29	43152779	FERMT3	SYN	matched neutral	-	2	238	6145	0.0189507	0.0512409
29	43611191	PYGM	NSYN	missense	G->R	4	372	6009	0.0297572	0.219397
29	43627640	SF1	SYN	matched neutral	-	28	832	5525	0.069538	0.149094
29	43852721	ARL2	NSYN	missense	R->H	30	868	5487	0.0726703	0.191438
29	45812382	ENSBTAG00000044032	NSYN	missense	I->V	1	66	6318	0.00532498	-0.46161
29	46164365	UNC93B1	NSYN	missense	V->I	41	991	5351	0.0840514	0.180183
29	48988274	ENSBTAG00000000776	NSYN	missense	G->R	27	801	5557	0.0669538	0.0818729
29	48989068	ENSBTAG00000000776	NSYN	missense	C->F	27	811	5547	0.0677369	0.118852

## Sheet: VAR_NZDC
Supplemental Table S2B: Candidate variants, NZDC
Chromosome	Position	Gene	Mutation type	Subtype	AA_change	observed mut/mut	observed mut/wt	observed wt/wt	p(mutation)	Plots log1/p
1	179241	ENSBTAT00000002299	NSYN	missense	P->R	7.0324	931.793	34226.7	0.0134487	-0.0690509
1	179676	ENSBTAT00000002299	NSYN	missense	R->P	0	3.4708	34704.5	5e-05	0.00458885
1	460117	MGC134427	NSYN	missense	S->I	3.5201	344.97	34852.5	0.005	-0.871316
1	998835	ENSBTAT00000029333	NSYN	missense	T->M	14.0848	1204.25	33993.7	0.0175	-0.303325
1	1004445	ENSBTAT00000029333	LOF	splice-site	-	7.0422	989.429	34218	0.0142486	0.00995372
1	1089045	ENSBTAT00000029333	NSYN	missense	P->L	56.3472	2313.76	32843.4	0.0344534	-0.88345
1	2917949	ENSBTAT00000027668	NSYN	missense	L->I	3.4996	430.451	34565.5	0.00624938	-0.549729
1	3116044	SOD1	NSYN	missense	I->F	3.5207	746.388	34453.6	0.0107011	0.0684665
1	6481124	CCT8	NSYN	missense	G->S	0	232.432	34984.6	0.0033	0.418919
1	8812191	ADAMTS5	NSYN	missense	Y->H	7.0158	912.054	34159.9	0.0132	-0.0965422
1	8958113	ADAMTS1	NSYN	missense	P->H	0	126.626	35047.4	0.0018	0.198552
1	10061282	GABPA	NSYN	missense	T->M	94.9806	3443.93	31639.1	0.05165	-0.0296574
1	14791465	ENSBTAT00000034421	NSYN	missense	D->N	28.1704	1204.28	33980.5	0.0179	-2.5431
1	22292746	HSPA13	NSYN	missense	P->L	0	3.5215	35211.5	5e-05	0.00462242
1	35013926	POU1F1	NSYN	missense	P->H	17.6085	1384.03	33811.8	0.020152	-0.259189
1	35604142	HTR1F	NSYN	missense	R->Q	35.194	1731.54	33427.3	0.0256	-1.01067
1	36715330	EPHA3	NSYN	missense	L->H	38.731	2031.62	33139.7	0.02995	-0.414503
1	37970452	NSUN3	NSYN	missense	S->L	0	489.516	34727.5	0.00695	1.18636
1	44652737	EFHB	LOF	nonsense	R->*	200.594	5099.32	29892.1	0.07815	0.316093
1	46094151	ENSBTAT00000020801	NSYN	missense	I->M	3.5216	820.533	34391.9	0.01175	0.186392
1	52810797	BBX	NSYN	missense	T->I	0	274.49	34916.5	0.0039	0.521681
1	53327346	IFT57	NSYN	missense	R->H	147.853	3914.57	31140.6	0.0598	-0.751412
1	54143301	ENSBTAT00000052196	NSYN	missense	Q->E	42.2568	1915.64	33252.6	0.0284028	-1.06217
1	56878776	ENSBTAT00000016779	NSYN	missense	L->M	140.564	3412.19	31588.2	0.05255	-2.47028
1	56878942	ENSBTAT00000016779	NSYN	missense	T->K	210.99	4254.97	30695.5	0.0665067	-2.55255
1	57792900	SLC35A5	NSYN	missense	N->T	0	24.6505	35190.3	0.00035	0.0333915
1	57803585	SLC35A5	NSYN	missense	S->P	14.0684	1146.57	34010.4	0.0167	-0.435553
1	57853009	CCDC80	NSYN	missense	P->R	0	52.8285	35166.2	0.00075	0.0745731
1	58746959	SIDT1	NSYN	missense	P->L	0	94.9617	35076	0.00135	0.142482
1	59121127	ENSBTAT00000006550	NSYN	missense	S->I	66.8933	1024.52	34115.6	0.01645	-16.8989
1	59372723	ENSBTAT00000015813	NSYN	missense	G->R	169.003	4196.91	30843.1	0.0644	-0.724164
1	64794853	ENSBTAT00000000253	NSYN	missense	S->N	52.821	2753.73	32407.4	0.0406	0.206119
1	65231631	NR1I2	NSYN	missense	K->E	3.5212	573.956	34634.5	0.00825	-0.199709
1	66791163	ENSBTAT00000011669	NSYN	missense	Q->R	101.767	3109.15	31881.1	0.0472	-1.14727
1	67008928	ENSBTAT00000001891	NSYN	missense	S->N	3.5194	1263.46	33923.5	0.0180518	1.28814
1	67579389	PARP9	NSYN	missense	H->D	0	204.259	35012.7	0.0029	0.355059
1	67635595	PARP14	NSYN	missense	N->S	0	98.518	35083	0.00140014	0.148535
1	67845070	ENSBTAT00000024989	NSYN	missense	R->C	0	662.042	34553	0.0094	1.8994
1	68263151	ADCY5	NSYN	missense	P->L	63.3798	2306.32	32841.3	0.03455	-1.51798
1	69673871	KALRN	NSYN	missense	P->S	14.0852	862.719	34336.2	0.01265	-1.45839
1	69850975	ITGB5	NSYN	missense	T->M	17.589	1259.37	33904.6	0.0183982	-0.55695
1	71022771	KIAA0226	NSYN	missense	T->M	72.9519	2765.22	31904.3	0.0418958	-0.533433
1	71078565	ENSBTAT00000015160	NSYN	missense	R->H	66.8762	2477.94	32653.2	0.0371	-1.11554
1	71114409	ENSBTAT00000019591	NSYN	missense	R->H	239.428	4785.04	30185.5	0.07475	-1.43293
1	71791549	ENSBTAT00000012650	NSYN	missense	T->M	17.606	1482.43	33712	0.02155	-0.0816635
1	72014715	NCBP2	NSYN	missense	Q->P	0	337.69	34838.3	0.0048	0.692585
1	73105105	ENSBTAT00000019358	NSYN	missense	D->N	3.514	523.586	34612.9	0.00755	-0.304823
1	74462799	OPA1	NSYN	missense	S->F	0	28.1272	35130.9	0.0004	0.038329
1	74580905	ENSBTAT00000021694	NSYN	missense	V->M	0	584.602	34632.4	0.0083	1.55896
1	74733919	ENSBTAT00000024824	NSYN	missense	V->M	7.0178	915.823	34166.2	0.01325	-0.0909032
1	75221284	MB21D2	NSYN	missense	P->S	1336.6	10762.3	22614.7	0.193519	-0.331151
1	81007082	ENSBTAT00000026395	NSYN	missense	Q->R	7.0426	950.751	34258.7	0.0136986	-0.0428975
1	81857585	ENSBTAT00000015016	NSYN	missense	G->D	1017.34	8522.4	25665.8	0.149935	-7.42933
1	82303406	MAP3K13	NSYN	missense	V->M	973.655	8316.49	25859.9	0.146	-7.67975
1	83477809	ENSBTAT00000032213	NSYN	missense	P->L	10.5603	1186.27	34000.6	0.0171517	-0.0159086
1	83508312	ECE2	NSYN	missense	R->H	17.5745	1785.57	33342.3	0.0259026	0.444481
1	83765132	ENSBTAT00000023496	NSYN	missense	S->A	10.5363	1116.85	33990.1	0.0162016	-0.116866
1	84469481	ENSBTAT00000013720	NSYN	missense	E->A	14.0832	1221.72	33972.2	0.01775	-0.265727
1	84597305	ENSBTAT00000008604	NSYN	missense	R->H	7.0436	1077.67	34133.3	0.0155	0.141105
1	88484585	KCNMB3	NSYN	missense	R->H	0	137.342	35078.7	0.00195	0.218389
1	94502625	NLGN1	NSYN	missense	V->I	3.5218	644.489	34573.5	0.00924908	-0.0756843
1	95519045	ECT2	NSYN	missense	S->C	24.5084	1621.06	33366.4	0.02385	-0.316539
1	95765541	ENSBTAT00000025281	NSYN	missense	R->W	0	299.362	34919.6	0.00425	0.586137
1	95904857	FNDC3B	NSYN	missense	S->N	24.6526	2060.25	33136.6	0.029947	0.439131
1	97156226	ENSBTAT00000015600	NSYN	missense	T->M	28.1544	1643.51	33521.3	0.02415	-0.585347
1	103001835	ENSBTAT00000022827	NSYN	missense	R->C	63.3888	2831.37	32321.2	0.042	-0.0411165
1	107213513	B3GALNT1	NSYN	missense	V->I	24.5917	702.62	34403.8	0.0107	-6.00765
1	109736556	GFM1	NSYN	missense	N->S	0	63.3852	35150.6	0.0009	0.0908581
1	111012523	ENSBTAT00000034317	NSYN	missense	M->T	49.252	1948.97	33181.8	0.0291	-1.67251
1	111330363	CCNL1	NSYN	missense	S->P	3.5218	824.101	34390.4	0.0118	0.19248
1	112455476	ENSBTAT00000065699	NSYN	missense	P->L	0	10.5618	35195.4	0.00015	0.0140124
1	113045674	ENSBTAT00000010937	NSYN	missense	G->C	24.647	1971.76	33213.6	0.0287	0.254171
1	114229371	ENSBTAT00000008088	NSYN	missense	R->Q	327.518	5138.16	29751.3	0.08225	-3.98498
1	116974582	AADAC	NSYN	missense	Y->F	38.3482	2098.69	32721.5	0.0312031	-0.221839
1	116974682	AADAC	NSYN	missense	A->P	0	220.998	34858	0.00315	0.393531
1	117840197	MED12L	NSYN	missense	G->S	0	66.9142	35151.1	0.00095	0.0963989
1	118655672	TSC22D2	NSYN	missense	G->R	174.69	3885.11	30878.2	0.0606	-2.22316
1	119750472	ENSBTAT00000020168	NSYN	missense	R->Q	20.832	1395.74	33303.4	0.0207	-0.517933
1	121881557	ENSBTAT00000032993	NSYN	missense	L->Q	214.629	4535.35	30431.5	0.0705571	-1.38614
1	122837960	PLSCR5	NSYN	missense	K->N	7.0366	971.051	34204.9	0.014	-0.0132864
1	127295921	TRPC1	NSYN	missense	E->A	10.5234	940.09	34130.9	0.0136986	-0.497317
1	130777458	COPB2	NSYN	missense	T->I	59.8723	2715.38	32443.7	0.04025	-0.100398
1	131558647	FAIM	NSYN	missense	D->N	940.187	8225.76	26047.1	0.1435	-7.32242
1	133654978	ENSBTAT00000021695	NSYN	missense	D->N	17.606	1334.53	33859.9	0.01945	-0.367572
1	135888845	ENSBTAT00000009235	NSYN	missense	E->G	21.105	1016.56	34137.3	0.01505	-2.19154
1	135934135	ENSBTAT00000009235	NSYN	missense	Q->H	21.1284	961.342	34231.5	0.01425	-2.54867
1	136706504	TF	NSYN	missense	I->T	7.0422	1228.86	33975.1	0.01765	0.432704
1	136848483	TOPBP1	NSYN	missense	P->L	0	165.511	35049.5	0.00235	0.273394
1	136960991	CDV3	NSYN	missense	K->E	0	6.9454	34720.1	0.0001	0.00922845
1	138088488	ACAD11	NSYN	missense	K->E	0	112.637	35086.4	0.0016	0.173158
1	140045613	NUDT16	NSYN	missense	G->D	218.339	4571.04	30426.6	0.0711	-1.41327
1	141931899	ENSBTAT00000006240	NSYN	missense	R->C	10.5654	898.059	34309.4	0.01305	-0.630301
1	143218442	TMPRSS2	NSYN	missense	G->R	0	3.5183	35179.5	5e-05	0.00462031
1	143680713	C2CD2	NSYN	missense	P->L	3.5216	760.666	34451.8	0.0109	0.0894644
1	144657547	WDR4	NSYN	missense	G->R	6.993	818.181	34139.8	0.0119	-0.266381
1	145114963	ITGB2	NSYN	missense	D->G	0	158.422	35046.6	0.00225	0.259256
1	145848924	ENSBTAT00000029198	NSYN	missense	R->W	3.4856	10.4568	34842.1	0.00025	-5.61703
1	146821015	ENSBTAT00000009338	NSYN	missense	E->D	0	408.378	34796.6	0.0058	0.907295
1	147058823	SLC19A1	NSYN	missense	V->G	3.5191	682.705	34508.3	0.00979902	-0.0188904
1	147062953	SLC19A1	NSYN	missense	E->G	144.341	3464.17	31596.5	0.0533	-2.4866
1	147410635	COL6A1	NSYN	missense	V->M	63.3438	2428.18	32699.5	0.0363	-1.02253
1	148078360	ENSBTAT00000031548	NSYN	missense	I->M	28.1728	1648.11	33539.7	0.0242	-0.575726
1	148078365	ENSBTAT00000031548	NSYN	missense	Q->R	66.8686	2484.7	32642.4	0.0372	-1.08911
1	148580942	ENSBTAT00000063511	NSYN	missense	P->S	7.0362	1400.2	33773.8	0.0201	0.868726
1	150108681	MGC127133	NSYN	missense	T->M	0	3.5046	35042.5	5e-05	0.00461126
1	150206475	ENSBTAT00000019018	NSYN	missense	S->C	975.391	8985.52	25125.1	0.15585	-2.50293
1	150737486	ENSBTAT00000057284	NSYN	missense	T->R	98.462	2890.56	32176	0.0439	-1.86954
1	150894062	ENSBTAT00000057284	NSYN	missense	E->K	42.2616	1933.47	33242.3	0.02865	-0.99804
1	151137394	ENSBTAT00000050511	NSYN	missense	R->H	0	514.081	34696.9	0.0073	1.27805
1	153416291	ENSBTAT00000017057	NSYN	missense	L->F	207.757	4891.09	30114.2	0.07535	-0.157153
1	153416318	ENSBTAT00000017057	NSYN	missense	E->K	207.562	4882.98	30085.9	0.0753075	-0.1628
1	153435900	ENSBTAT00000017057	NSYN	missense	S->P	73.3236	2737.41	32101.8	0.0413041	-0.650963
1	155741955	PLCL2	NSYN	missense	G->R	10.5537	1055.37	34116.6	0.0152985	-0.233576
2	648163	HERC2	NSYN	missense	V->M	0	650.941	34535.1	0.00925	1.84977
2	758495	HERC2	NSYN	missense	R->W	184.138	4502.69	30052.7	0.070107	-0.325025
2	994004	ENSBTAT00000022471	NSYN	missense	P->S	368.487	5407.99	29317.5	0.08755	-4.33984
2	4421487	ENSBTAT00000050755	NSYN	missense	T->N	70.028	2443.98	32500	0.0369	-1.48988
2	4807798	GPR17	NSYN	missense	V->M	734.28	7479.82	26915.4	0.127363	-5.59062
2	5813146	ENSBTAT00000010151	NSYN	missense	V->M	0	295.798	34914.7	0.00420042	0.576766
2	6877228	WDR75	LOF	splice-site	-	3.5209	1112.6	34089.4	0.0159016	0.83626
2	6909637	ENSBTAT00000003908	NSYN	missense	Y->N	489.28	6445.12	28265.6	0.10545	-3.149
2	9590299	FAM171B	NSYN	missense	A->T	0	38.7387	35178.3	0.00055	0.0535735
2	10617983	ENSBTAT00000013129	NSYN	missense	R->W	63.3168	2606.54	32502.6	0.0388539	-0.474228
2	14717047	ENSBTAT00000001241	NSYN	missense	T->M	3.5213	665.526	34544	0.00955	-0.0437325
2	17718376	SESTD1	NSYN	missense	R->H	59.8604	2478.92	32673.2	0.0369	-0.617531
2	17972950	ENSBTAT00000040194	NSYN	missense	A->V	7.0354	1291	33875.5	0.0185519	0.579889
2	18010107	CCDC141	NSYN	missense	I->L	133.741	3670.84	31390.4	0.05595	-0.906484
2	21705078	ATP5G3	NSYN	missense	F->S	0	21.1236	35184.9	0.0003	0.0284687
2	25776118	ENSBTAT00000004166	NSYN	missense	G->V	21.0312	1149.71	33881.3	0.017	-1.46069
2	26666217	ENSBTAT00000046952	NSYN	missense	G->R	56.3232	2259.97	32885.7	0.0337	-1.07006
2	26801238	BBS5	NSYN	missense	A->P	0	98.5208	35087.5	0.0014	0.148529
2	26974561	ENSBTAT00000005988	NSYN	missense	T->M	59.8689	2218.67	32938.5	0.0332	-1.56974
2	27043265	ENSBTAT00000005988	NSYN	missense	G->S	3.5219	581.114	34634.4	0.00835	-0.185991
2	29131824	ENSBTAT00000023600	NSYN	missense	A->E	21.1206	1900.85	33279	0.0276	0.37776
2	30120301	SCN9A	NSYN	missense	G->R	35.203	1777.75	33390	0.02625	-0.850548
2	30414846	SCN1A	NSYN	missense	L->F	0	338.083	34878.9	0.0048	0.693148
2	30521319	ENSBTAT00000005682	NSYN	missense	A->T	3.5215	1137.44	34070.5	0.0162516	0.904637
2	31283154	ENSBTAT00000024655	NSYN	missense	P->S	7.0418	834.453	34367.5	0.01205	-0.245355
2	34532628	ENSBTAT00000056886	LOF	nonsense	W->*	10.5654	1253.76	33957.2	0.0180982	0.0770445
2	36325642	ITGB6	NSYN	missense	R->S	73.9116	2787.52	32334.6	0.0417	-0.575692
2	36613240	LY75	NSYN	missense	R->H	0	126.724	35074.3	0.0018	0.198641
2	37240147	ENSBTAT00000005473	NSYN	missense	A->V	17.575	1086.13	34046.3	0.01595	-1.14445
2	37877437	PKP4	NSYN	missense	S->L	10.563	1190.1	34009.3	0.0172	-0.0112381
2	44731285	ENSBTAT00000061000	NSYN	missense	P->L	10.5651	1183.29	34026.7	0.0170983	-0.0208866
2	44780901	ENSBTAT00000027997	NSYN	missense	E->K	38.7288	1936.44	33232.8	0.0286	-0.669786
2	50561710	SNX6	NSYN	missense	M->T	0	827.576	34388.4	0.01175	2.74038
2	62335237	ENSBTAT00000038374	NSYN	missense	D->Y	474.255	5589.18	29066.6	0.09305	-9.81251
2	62631687	YSK4	NSYN	missense	T->S	323.895	5442.85	29439.3	0.0865	-1.97115
2	62632485	YSK4	NSYN	missense	R->C	7.0432	1056.48	34149	0.0152015	0.107188
2	62736375	ACMSD	NSYN	missense	R->P	0	77.4818	35141.5	0.0011	0.113323
2	71099168	ENSBTAT00000024586	NSYN	missense	L->S	38.7332	2031.73	33141.5	0.02995	-0.414518
2	71115795	ENSBTAT00000024586	NSYN	missense	L->P	38.6892	2032.94	33100.4	0.03	-0.40577
2	71115816	ENSBTAT00000024586	NSYN	missense	Q->L	38.7277	2027.92	33140.3	0.0299	-0.422999
2	71407692	ENSBTAT00000009356	NSYN	missense	R->C	104.403	3622.78	31070.3	0.0550555	0.026424
2	71407714	ENSBTAT00000009356	NSYN	missense	R->H	0	602.327	34413.2	0.00860086	1.64133
2	73516834	CLASP1	NSYN	missense	R->H	0	200.532	34977	0.00285029	0.347141
2	81640009	ENSBTAT00000062980	NSYN	missense	S->A	17.4545	785.452	34106.1	0.01175	-2.76517
2	84414186	ENSBTAT00000013153	LOF	splice-site	-	0	10.5576	35181.4	0.00015	0.0140095
2	84817438	DNAH7	NSYN	missense	T->M	3.5218	91.5668	35122.9	0.0014	-2.89861
2	84953105	DNAH7	NSYN	missense	F->C	116.117	3437.77	31633.1	0.05215	-0.816044
2	85028025	DNAH7	NSYN	missense	S->N	228.852	3770.78	31208.4	0.06005	-8.05699
2	85133377	ENSBTAT00000063587	LOF	nonsense	E->*	20.9796	1262.27	33682.7	0.01865	-0.977286
2	85269776	ENSBTAT00000038307	NSYN	missense	L->I	0	59.8553	35149.1	0.00085	0.0853691
2	88935567	ENSBTAT00000025608	LOF	splice-site	-	0	14.0476	35105	0.0002	0.0187578
2	89505846	SGOL2	NSYN	missense	R->T	88.0225	3045.58	32075.4	0.04575	-0.598963
2	89817192	ENSBTAT00000038328	NSYN	missense	G->S	0	394.419	34818.1	0.00560056	0.862623
2	89936649	ENSBTAT00000007126	NSYN	missense	V->I	3.5205	478.788	34722.7	0.0069	-0.419374
2	89978232	ORC2	NSYN	missense	G->R	0	144.349	35062.7	0.00205	0.231766
2	90170099	ENSBTAT00000014607	NSYN	missense	R->C	49.2856	2400.91	32753.8	0.0355	-0.216323
2	90390799	TRAK2	NSYN	missense	R->C	10.5477	1350.11	33798.3	0.0195	0.243508
2	90465834	ALS2CR11	NSYN	missense	S->Y	31.6656	2019.56	33132.8	0.0296	-0.0384504
2	90681841	ENSBTAT00000060956	NSYN	missense	A->V	7.0436	810.014	34397.4	0.0117012	-0.298081
2	91148875	LOC614993	NSYN	missense	R->W	732.222	7325.74	27148.6	0.124838	-6.97074
2	91584451	ENSBTAT00000011435	NSYN	missense	R->G	21.1296	1658.67	33536.2	0.02415	-0.0329785
2	91658889	ALS2CR8	NSYN	missense	V->A	52.812	1697.03	33454.6	0.0256026	-3.7384
2	91807797	NBEAL1	NSYN	missense	E->K	38.5462	2109.53	32897.4	0.0311969	-0.222945
2	91884093	NBEAL1	NSYN	missense	P->Q	184.885	4266.31	30432.8	0.06645	-1.05684
2	92027498	ABI2	NSYN	missense	P->Q	17.5995	1369.24	33812.2	0.01995	-0.288778
2	95051211	ENSBTAT00000044119	NSYN	missense	N->Y	42.2436	2087.54	33069.7	0.0308531	-0.515734
2	95486770	MDH1B	NSYN	missense	P->H	3.519	538.407	34648.1	0.00775	-0.273226
2	95493088	MDH1B	NSYN	missense	L->P	0	35.212	35176.8	0.0005	0.0484486
2	96697037	PLEKHM3	NSYN	missense	R->H	0	285.266	34932.7	0.00405	0.549082
2	96719717	PLEKHM3	NSYN	missense	R->W	334.296	5809.7	29045	0.09205	-0.838765
2	97179644	PTH2R	NSYN	missense	R->W	63.3564	2798.24	32332.9	0.0415542	-0.0884332
2	98250753	UNC80	NSYN	missense	T->M	7.018	894.795	34191.7	0.0129487	-0.125854
2	99714204	ENSBTAT00000064941	NSYN	missense	E->K	795.565	7452.26	26954.2	0.12845	-8.75375
2	101912406	ENSBTAT00000024688	LOF	nonsense	E->*	20.8962	1734.38	33075.2	0.0254975	0.10108
2	103565941	ABCA12	NSYN	missense	L->P	31.6899	1707.73	33471.6	0.02515	-0.733556
2	103567627	ABCA12	NSYN	missense	T->S	0	116.203	35096.8	0.00165	0.179486
2	104629079	ENSBTAT00000008962	NSYN	missense	V->L	42.1716	2315.92	32784.9	0.03415	-0.0476334
2	104637921	ENSBTAT00000008962	NSYN	missense	G->V	41.916	2141.21	32746.9	0.03185	-0.342832
2	106638678	TNS1	NSYN	missense	T->M	0	246.533	34972.5	0.0035	0.452303
2	106881370	RUFY4	NSYN	missense	K->N	108.959	3423.42	31615.6	0.0518	-0.526698
2	106882738	ENSBTAT00000063006	NSYN	missense	R->K	109.108	3428.09	31658.8	0.0518	-0.527179
2	107030810	TMBIM1	NSYN	missense	R->Q	0	24.6505	35190.3	0.00035	0.0333915
2	107313998	PLCD4	NSYN	missense	A->T	20.9292	1890.6	32970.5	0.0277	0.390815
2	107376399	STK36	NSYN	missense	A->V	0	217.967	34938	0.0031	0.386083
2	107621192	ENSBTAT00000053045	NSYN	missense	P->L	0	3.5152	35148.5	5e-05	0.00461826
2	107845268	ENSBTAT00000016753	NSYN	missense	L->M	0	220.916	34845.1	0.00315	0.393437
2	107845490	CNPPD1	NSYN	missense	V->M	3.5214	531.731	34682.3	0.00764924	-0.289159
2	107895661	ENSBTAT00000027461	NSYN	missense	G->S	102.097	3235.43	31868.5	0.04885	-0.752645
2	107905585	ANKZF1	LOF	nonsense	R->*	0	327.527	34890.5	0.00465	0.663214
2	108117201	SPEG	NSYN	missense	R->H	63.3852	2415.68	32731.4	0.0361036	-1.07398
2	108275181	SLC4A3	NSYN	missense	S->C	0	175.605	34945.4	0.0025	0.294479
2	108281729	SLC4A3	NSYN	missense	V->M	0	165.525	35052.5	0.00235	0.273408
2	113286961	FAM124B	NSYN	missense	A->T	119.731	2750.29	32348.5	0.0424458	-5.06369
2	114529248	ENSBTAT00000025490	NSYN	missense	R->W	10.5621	1302.66	33890.3	0.0188019	0.155955
2	116019054	ENSBTAT00000018302	NSYN	missense	R->T	3.5218	503.617	34710.9	0.00725	-0.35587
2	118390280	ENSBTAT00000021383	NSYN	missense	S->L	31.6881	2035.08	33142.2	0.0298	-0.0188123
2	118631515	TRIP12	NSYN	missense	R->C	14.0876	1183.36	34021.6	0.0172	-0.350836
2	119709837	HTR2B	NSYN	missense	P->L	0	285.169	34917.3	0.00405041	0.548993
2	120278588	ENSBTAT00000019953	NSYN	missense	R->H	7	546	34447	0.008	-1.13724
2	121235991	ENSBTAT00000061294	NSYN	missense	Y->H	6.972	895.902	33957.1	0.01305	-0.113483
2	121426807	ENSBTAT00000027374	LOF	nonsense	R->*	3.5199	390.709	34804.8	0.00565	-0.693217
2	121790575	SYNC	NSYN	missense	E->K	56.3472	1148.07	34012.6	0.0179	-10.8342
2	122237743	ENSBTAT00000016581	NSYN	missense	G->S	549.292	6281.64	28376.5	0.10481	-7.48819
2	122690089	ENSBTAT00000038022	NSYN	missense	E->V	0	429.66	34788.3	0.0061	0.976913
2	122748388	ENSBTAT00000056771	NSYN	missense	P->H	73.7184	2952.25	32081.5	0.0441456	-0.184242
2	122754834	ENSBTAT00000056771	NSYN	missense	R->C	10.5639	1081.04	34121.4	0.01565	-0.185758
2	125558398	PHACTR4	NSYN	missense	N->Y	109.154	2133.79	32968.1	0.0334	-9.98542
2	126494812	CD164L2	NSYN	missense	Q->K	0	119.643	35069.4	0.0017	0.185755
2	126521070	ENSBTAT00000013544	NSYN	missense	I->M	341.537	5161.79	29706.7	0.083	-4.66466
2	126918506	GPN2	NSYN	missense	A->T	0	636.686	34539.3	0.00905	1.78584
2	127377664	AIM1L	NSYN	missense	V->I	49.1442	2193.94	32863.4	0.0326467	-0.708112
2	127641249	SLC30A2	NSYN	missense	V->M	0	14.0828	35192.9	0.0002	0.0187818
2	127652143	EXTL1	NSYN	missense	R->Q	42.2436	2161.46	32995.8	0.0319032	-0.33641
2	128321698	ENSBTAT00000002165	NSYN	missense	K->T	622.969	6472.54	28100.5	0.10965	-9.9718
2	129388849	ENSBTAT00000019817	NSYN	missense	R->H	7.0354	1132.7	34037.3	0.0163	0.239561
2	129404241	ENSBTAT00000019817	NSYN	missense	P->Q	186.587	3886.63	31128.3	0.0605061	-3.13032
2	129668376	FUCA1	NSYN	missense	T->I	306.327	5168.83	29731.3	0.0821082	-2.62549
2	129672627	FUCA1	NSYN	missense	G->R	0	91.5642	35125.4	0.0013	0.136627
2	129738742	ENSBTAT00000063789	NSYN	missense	T->M	0	650.904	34533.1	0.00925	1.84968
2	130005614	ASAP3	NSYN	missense	G->E	21.1242	1253.37	33932.5	0.0184	-1.0485
2	130851466	ENSBTAT00000037789	NSYN	missense	V->G	0	3.5089	35085.5	5e-05	0.0046141
2	131432669	ENSBTAT00000017401	NSYN	missense	L->F	45.4051	2092.13	32789.5	0.03125	-0.714468
2	131538298	ENSBTAT00000022744	NSYN	missense	V->M	24.6372	2129.36	33042	0.03095	0.610485
2	131585940	ENSBTAT00000022744	NSYN	missense	T->I	617.5	6622.51	27451	0.11325	-7.42223
2	131774319	RAP1GAP	NSYN	missense	R->W	154.867	3878.71	31163.4	0.0595	-1.19146
2	132036890	ECE1	NSYN	missense	V->M	0	249.948	34954.1	0.00355	0.460668
2	132505320	HP1BP3	NSYN	missense	S->F	0	123.116	35052.9	0.00175	0.192109
2	132580493	KIF17	NSYN	missense	E->K	0	73.8906	35112.1	0.00105	0.107573
2	132598582	DDOST	NSYN	missense	G->R	59.6751	2583.58	32456.2	0.0385039	-0.333346
2	134103015	UBR4	NSYN	missense	F->L	10.5096	868.794	34152.7	0.0127	-0.70512
2	134124922	ENSBTAT00000020277	NSYN	missense	V->M	34.628	2340.85	32252.5	0.0348	0.386965
2	135585795	ARHGEF10L	NSYN	missense	R->P	7.0122	792.379	34258.1	0.0115012	-0.329038
2	135843005	PADI4	NSYN	missense	P->L	0	200.623	34996.4	0.00285	0.347219
2	136070183	ENSBTAT00000004411	NSYN	missense	P->S	3.5077	726.094	34347.4	0.01045	0.042964
2	136174567	ATP13A2	NSYN	missense	R->W	7.0112	220.853	34828.1	0.00335	-3.64042
2	136618647	ENSBTAT00000049019	NSYN	missense	P->L	3.5189	457.457	34724.5	0.00660066	-0.477861
3	276353	TBX19	NSYN	missense	R->C	0	401.417	34810.6	0.0057	0.884828
3	885143	ENSBTAT00000001400	NSYN	missense	S->Y	119.7	3830.41	31255.9	0.0578	-0.0495791
3	1068845	RCSD1	NSYN	missense	S->G	28.116	1609.64	33507.2	0.0237	-0.677096
3	1658697	DUSP27	NSYN	missense	W->R	31.6971	2003.96	33183.3	0.02935	-0.0642513
3	2775343	FAM78B	NSYN	missense	R->L	0	70.388	35123.6	0.001	0.101948
3	6568161	ENSBTAT00000039375	NSYN	missense	P->Q	31.6944	1581.2	33603.1	0.02335	-1.1841
3	7121682	NOS1AP	NSYN	missense	L->H	14.072	1368.5	33797.4	0.01985	-0.0140278
3	8192692	C3H1orf192	NSYN	missense	P->Q	3.5199	489.266	34709.7	0.0070493	-0.391522
3	8309983	NDUFS2	NSYN	missense	R->H	0	70.414	35136.6	0.001	0.101969
3	8393132	NIT1	NSYN	missense	T->A	0	151.42	35062.6	0.00215	0.245431
3	8770827	ENSBTAT00000063090	NSYN	missense	R->W	3.517	636.577	34529.9	0.00915	-0.0867161
3	8849047	ENSBTAT00000003840	NSYN	missense	T->S	31.6809	2090.94	33078.4	0.0306	0.0585552
3	9521831	PEX19	NSYN	missense	P->T	224.768	4604.23	30294.5	0.0719428	-1.53257
3	9874630	ENSBTAT00000001940	NSYN	missense	V->I	0	697.316	34520.7	0.0099	2.06543
3	11170412	SPTA1	LOF	nonsense	R->*	0	77.4796	35140.5	0.0011	0.113321
3	12143353	ENSBTAT00000033956	NSYN	missense	A->V	0	352.14	34861.9	0.005	0.733922
3	12172315	ENSBTAT00000012703	LOF	nonsense	Q->*	3.5178	724.667	34453.3	0.010399	0.0380314
3	12560765	CD5L	NSYN	missense	V->M	0	242.901	34960.1	0.00345	0.443739
3	12604380	CD5L	NSYN	missense	R->C	3.5049	599.338	34446.2	0.00865	-0.14621
3	12699962	ENSBTAT00000001279	NSYN	missense	G->R	0	725.367	34486.6	0.0103	2.20289
3	13778690	ETV3L	NSYN	missense	N->I	176.368	3918.14	30490.9	0.0617438	-2.04449
3	14023923	ENSBTAT00000003980	NSYN	missense	R->W	0	102.126	35113.9	0.00145	0.15467
3	14210397	ENSBTAT00000020974	NSYN	missense	A->G	0	588.007	34618.5	0.00835084	1.57359
3	14211933	NES	NSYN	missense	S->C	0	591.646	34625.4	0.0084	1.58854
3	14213142	NES	NSYN	missense	L->M	291.704	4656.71	30196.6	0.07455	-5.28094
3	14316025	IQGAP3	NSYN	missense	A->V	225.331	4570	30412.7	0.0713	-1.73847
3	14576644	SMG5	NSYN	missense	V->M	0	595.184	34622.8	0.00845	1.60346
3	14871936	RXFP4	NSYN	missense	H->Y	0	573.956	34638	0.00815	1.51494
3	14872586	RXFP4	NSYN	missense	Y->S	0	559.012	34595.5	0.0079508	1.45582
3	14968479	ENSBTAT00000065433	NSYN	missense	R->W	0	580.981	34630	0.00825	1.54407
3	14975808	ENSBTAT00000065433	NSYN	missense	Q->L	0	584.586	34631.4	0.0083	1.55893
3	14986633	ENSBTAT00000065433	NSYN	missense	G->R	63.3474	2181.97	32947.7	0.0328	-2.11978
3	15437820	ENSBTAT00000066098	NSYN	missense	L->R	0	200.412	34959.6	0.00285	0.346988
3	15466019	MTX1	NSYN	missense	G->E	10.5633	1542.24	33654.7	0.0222022	0.670676
3	16450078	ENSBTAT00000006566	NSYN	missense	G->E	7.042	728.847	34477.6	0.0105489	-0.5
3	16758175	NPR1	NSYN	missense	T->M	0	165.487	35044.5	0.00235	0.27337
3	16785057	SNAPIN	NSYN	missense	S->Y	219.901	4010.58	30674.5	0.06375	-4.75606
3	17165076	S100A12	NSYN	missense	A->T	3.5218	207.786	35006.7	0.00305	-1.63861
3	18894576	THEM4	NSYN	missense	R->P	10.4907	888.213	34073.8	0.0129987	-0.638089
3	18984559	ENSBTAT00000065982	NSYN	missense	E->K	0	14.012	35016	0.0002	0.0187335
3	19299258	CGN	NSYN	missense	T->M	0	140.82	35064.2	0.002	0.225025
3	19308922	CGN	NSYN	missense	R->H	10.4094	1658.56	33025.6	0.0242024	1.06624
3	19407305	POGZ	NSYN	missense	T->M	0	211.272	34997.2	0.0030003	0.370657
3	19648954	ENSBTAT00000036689	NSYN	missense	R->S	10.5615	1299.06	33895.4	0.01875	0.149915
3	19753088	GABPB2	NSYN	missense	T->N	0	3.5219	35215.5	5e-05	0.00462269
3	20189903	ADAMTSL4	NSYN	missense	R->C	10.4988	860.902	34124.6	0.0126	-0.727493
3	20400973	ENSBTAT00000028639	NSYN	missense	P->L	1148.07	8578.86	25490.1	0.1544	-12.2961
3	20403619	ENSBTAT00000028639	NSYN	missense	S->F	14.0796	696.94	34488	0.0103	-2.41192
3	20426345	ENSBTAT00000028634	NSYN	missense	V->M	0	556.35	34655.7	0.0079	1.44324
3	21546781	ENSBTAT00000011015	NSYN	missense	R->G	24.6463	1197.11	33987.2	0.0177	-1.89398
3	21559844	ENSBTAT00000011019	NSYN	missense	A->S	70.242	2778.07	32272.7	0.04155	-0.404094
3	21578588	ITGA10	NSYN	missense	T->M	0	130.292	35083.7	0.00185	0.205194
3	21619851	ENSBTAT00000028829	NSYN	missense	T->M	70.402	2851.28	32279.3	0.0425	-0.258187
3	21621113	PIAS3	NSYN	missense	H->R	31.6566	1938.09	33204.3	0.02845	-0.168656
3	22603017	FMO5	NSYN	missense	R->C	0	21.1296	35194.9	0.0003	0.0284728
3	22979849	ENSBTAT00000052249	NSYN	missense	R->Q	0	126.778	35089.2	0.0018	0.198691
3	25447310	GDAP2	NSYN	missense	R->H	218.29	4950.24	30039.5	0.0765	-0.260339
3	26336788	CD101	NSYN	missense	E->D	0	253.519	34957.5	0.0036	0.469281
3	27014362	ATP1A1	NSYN	missense	R->W	28.168	1897.82	33284	0.02775	-0.0521478
3	29400425	ENSBTAT00000025132	NSYN	missense	L->P	3.511	842.64	34263.8	0.0121	0.229437
3	29709425	PTPN22	LOF	splice-site	-	7.0408	936.426	34260.5	0.0135	-0.0636637
3	30318931	ENSBTAT00000038959	NSYN	missense	G->S	189.232	3753.11	31100.7	0.05895	-4.20285
3	31465306	KCND3	NSYN	missense	P->L	66.9104	3060.27	32088.8	0.04535	0.192393
3	31732048	ENSBTAT00000030590	NSYN	missense	R->H	932.111	7703.11	26535.3	0.136014	-12.8676
3	33798941	GSTM1	LOF	nonsense	C->*	0	56.2656	35109.7	0.0008	0.0798866
3	34019325	GPR61	NSYN	missense	R->W	355.581	5643.52	29206.9	0.09025	-2.26658
3	34056999	ENSBTAT00000018722	NSYN	missense	P->L	669.226	6891.97	27476.8	0.11745	-7.89809
3	34241409	PSRC1	NSYN	missense	G->V	31.6836	2126.32	33046	0.0311	0.112605
3	34261793	CELSR2	NSYN	missense	S->L	204.813	4429.51	30079.7	0.0697	-1.25039
3	34403626	ENSBTAT00000056397	NSYN	missense	D->E	577.264	6490.7	28131	0.1086	-7.04412
3	39935699	AMY2B	NSYN	missense	G->R	59.806	3412.46	31707.7	0.0502	1.6757
3	43412427	SLC35A3	NSYN	missense	V->F	0	799.403	34416.6	0.01135	2.5862
3	43531671	AGL	NSYN	missense	R->C	0	231.739	34880.3	0.0033	0.418109
3	44679982	SNX7	NSYN	missense	I->T	3.5201	679.379	34518.1	0.00975	-0.0237023
3	46311905	DPYD	NSYN	missense	R->H	17.6005	1668.53	33518.4	0.0241976	0.200553
3	48855652	ENSBTAT00000033542	NSYN	missense	F->L	1362.05	9080.31	24752.6	0.1677	-15.039
3	48855688	SLC44A3	LOF	nonsense	R->*	38.731	2123.16	33048.1	0.03125	-0.216564
3	49669201	ABCA4	NSYN	missense	R->Q	164.589	4279.32	30575.1	0.0658	-0.335712
3	49758450	GCLM	NSYN	missense	R->P	10.5654	1472.11	33735.3	0.0212	0.496071
3	49951843	BCAR3	NSYN	missense	P->R	0	245.581	34833.9	0.00350035	0.451188
3	54362974	ENSBTAT00000056911	NSYN	missense	L->M	7.0272	762.451	34366.5	0.01105	-0.405994
3	55073213	ENSBTAT00000032697	NSYN	missense	L->V	105.054	3638.37	31274.6	0.05495	0.0166236
3	56178902	ENSBTAT00000002439	NSYN	missense	W->L	0	485.87	34722.1	0.0069	1.17328
3	57411243	ENSBTAT00000044128	NSYN	missense	R->Q	13.8652	1570.23	33078.9	0.02305	0.363888
3	57421819	ENSBTAT00000044128	NSYN	missense	A->T	549.167	7206.05	27447.8	0.11795	-1.21663
3	57835178	ODF2L	NSYN	missense	K->E	35.142	1641.13	33465.7	0.02435	-1.35893
3	59634016	SSX2IP	NSYN	missense	R->C	3.5205	577.362	34624.1	0.0083	-0.192777
3	59707190	CTBS	NSYN	missense	S->F	0	203.632	34905.4	0.0029	0.354369
3	59968849	SAMD13	NSYN	missense	K->E	0	137.288	35064.7	0.00195	0.218337
3	59969367	SAMD13	NSYN	missense	S->F	3.5217	1133.99	34079.5	0.0162	0.894633
3	60449065	TTLL7	NSYN	missense	T->I	334.505	4975.31	29901.2	0.08015	-5.73028
3	66011018	ENSBTAT00000026299	NSYN	missense	K->R	59.7907	2159.5	32951.7	0.0324	-1.83487
3	67011142	ENSBTAT00000039125	NSYN	missense	R->K	168.614	4015.13	30947.8	0.0619438	-1.32687
3	69318970	RABGGTB	NSYN	missense	Y->C	0	952.863	34208.1	0.01355	3.48625
3	75083217	CTH	NSYN	missense	A->T	24.5882	2170.79	32930.6	0.0316	0.732015
3	78244447	SERBP1	NSYN	missense	R->L	374.318	3466.82	31138.4	0.060256	-35.5449
3	78554503	C3H1orf141	NSYN	missense	S->F	358.102	5954.32	28795.6	0.095	-0.971263
3	78984284	ENSBTAT00000030846	LOF	splice-site	-	31.5333	1611.7	33393.8	0.0239	-1.03061
3	80249044	LEPROT	NSYN	missense	I->V	1548.98	11363.9	22294.7	0.205379	-0.630638
3	80302577	ENSBTAT00000043462	NSYN	missense	T->I	38.7365	2458.01	32718.3	0.036	0.339259
3	80965150	ENSBTAT00000043383	NSYN	missense	R->Q	0	144.316	35054.7	0.00205	0.231734
3	81120665	ENSBTAT00000021878	NSYN	missense	P->L	0	544.747	34600.3	0.00775	1.39897
3	82253594	PGM1	NSYN	missense	R->W	84.4992	3401.09	31722.4	0.0507	0.186147
3	82275163	PGM1	NSYN	missense	Q->P	672.492	6640.42	27899.6	0.113389	-11.157
3	82279986	PGM1	NSYN	missense	K->N	1164.39	8530.66	25486.5	0.154335	-13.6206
3	82435602	ITGB3BP	NSYN	missense	G->V	0	281.512	34907.5	0.004	0.539677
3	83590427	DOCK7	NSYN	missense	R->Q	10.5615	1116	34078.4	0.01615	-0.123036
3	83849494	KANK4	NSYN	missense	S->N	119.724	3637.5	31455.8	0.05505	-0.418272
3	86287932	C3H1orf87	LOF	nonsense	Q->*	1009.67	7989.38	26181	0.14225	-13.2176
3	86490464	ENSBTAT00000013230	NSYN	missense	R->C	136.945	4817.64	30155.9	0.0725073	2.03794
3	89750271	C8B	NSYN	missense	T->M	24.6477	1767.59	33418.8	0.0258	-0.0650674
3	89769140	C8B	NSYN	missense	Y->H	91.4836	2853.58	32240.9	0.04315	-1.49172
3	92963212	ENSBTAT00000043246	NSYN	missense	I->M	495.53	6916.34	27732.1	0.1125	-1.03295
3	93604109	CPT2	NSYN	missense	E->D	656.095	8011.99	26045.9	0.1343	-0.401988
3	93885052	SCP2	NSYN	missense	I->V	91.5304	3133.16	31979.3	0.0471	-0.530238
3	94565598	ORC1	NSYN	missense	V->G	35.158	1743.84	33379	0.0258	-0.959114
3	94583704	ENSBTAT00000021129	NSYN	missense	T->M	1295.76	9415.42	24496.3	0.170517	-8.3491
3	94929953	RAB3B	NSYN	missense	R->C	1323.71	9473.67	24407.6	0.17215	-8.67053
3	95116567	NRD1	NSYN	missense	R->W	0	190.172	35026.8	0.0027	0.324549
3	95336331	ENSBTAT00000033333	NSYN	missense	P->A	355.49	3297.96	31543.6	0.05695	-36.6701
3	98078224	ENSBTAT00000012132	NSYN	missense	A->T	6.9796	792.185	34095.3	0.0115512	-0.320043
3	98578797	SLC5A9	NSYN	missense	R->H	76.4676	2926.62	31754.9	0.0443	-0.311816
3	98584811	SLC5A9	NSYN	missense	S->P	3.5136	442.714	34693.3	0.00639936	-0.518898
3	98675186	SKINT1	NSYN	missense	D->N	77.4664	3176.12	31958.4	0.0473	0.0379327
3	98715526	ENSBTAT00000038816	NSYN	missense	G->R	69.42	3189.85	31450.7	0.04795	0.398067
3	99540741	STIL	NSYN	missense	P->S	77.4532	3165.02	31963.5	0.04715	0.0232033
3	99564474	ENSBTAT00000023728	NSYN	missense	K->R	77.3608	3055.75	32030.9	0.04565	-0.131924
3	99687370	ENSBTAT00000020783	NSYN	missense	G->A	91.5252	3242.1	31868.4	0.04865	-0.274974
3	99695288	GSR	NSYN	missense	G->A	77.044	3172.81	31770.1	0.0475	0.0580798
3	99695307	GSR	NSYN	missense	G->R	77.4554	3168.63	31960.9	0.0472	0.0280642
3	99695797	GSR	NSYN	missense	G->R	0	306.336	34904.7	0.00435	0.604939
3	99695980	GSR	NSYN	missense	A->T	35.19	2150.11	33004.7	0.03155	-0.00674787
3	99929529	CYP4A22	NSYN	missense	V->M	0	228.858	34980.1	0.00325	0.410667
3	100300080	ENSBTAT00000055811	NSYN	missense	I->N	0	197.159	35009.8	0.0028	0.339626
3	100416552	ENSBTAT00000064452	LOF	splice-site	-	84.4968	3189.75	31929.2	0.0477048	-0.13597
3	100483136	ENSBTAT00000033319	NSYN	missense	G->E	84.432	3152.13	31943.4	0.0472	-0.198964
3	100498539	TSPAN1	NSYN	missense	L->R	84.2736	3167.28	31862.4	0.0475	-0.160432
3	100683883	ENSBTAT00000033290	NSYN	missense	R->C	10.5633	1485.9	33714.5	0.0214	0.529348
3	100765874	ENSBTAT00000033290	NSYN	missense	R->W	123.256	3401.87	31690.9	0.0518	-1.34265
3	100970797	ENSBTAT00000031396	NSYN	missense	A->S	84.5112	3190.3	31934.7	0.0477048	-0.135983
3	101319589	ENSBTAT00000014930	NSYN	missense	S->G	83.5728	3189.7	31545.2	0.0482048	-0.078438
3	101329400	MUTYH	NSYN	missense	E->K	49.28	2249.28	32901.4	0.03335	-0.567009
3	101331146	MUTYH	NSYN	missense	R->C	0	7.0142	35064	0.0001	0.00927453
3	101333708	HPDL	NSYN	missense	L->V	80.914	3127.5	31971.6	0.04675	-0.126521
3	101334736	HPDL	NSYN	missense	L->W	77.3212	3110.42	31954.7	0.0464546	-0.0436442
3	101682765	EIF2B3	NSYN	missense	K->E	0	197.204	35017.8	0.0028	0.339674
3	101911551	C3H1orf228	NSYN	missense	P->L	63.3906	2606.06	32547.6	0.0388	-0.483867
3	102304848	ERI3	NSYN	missense	M->V	295.798	5299.71	29618.5	0.08365	-1.5166
3	102660628	B4GALT2	NSYN	missense	G->R	0	165.426	35031.6	0.00235	0.273309
3	103216440	ENSBTAT00000022477	NSYN	missense	L->F	0	119.741	35098.3	0.0017	0.185844
3	103287009	ENSBTAT00000004917	NSYN	missense	E->K	14.0812	1330.67	33858.2	0.0193	-0.069687
3	103287853	TIE1	NSYN	missense	R->W	56.1808	2559.74	32500.6	0.0380462	-0.22064
3	103378518	ENSBTAT00000022486	NSYN	missense	R->W	281.52	4919.56	29992.4	0.0778922	-2.78105
3	103689175	ENSBTAT00000023048	NSYN	missense	M->V	0	285.144	34917.9	0.00405	0.548924
3	103723446	ENSBTAT00000016480	NSYN	missense	H->Q	3.5211	292.251	34918.7	0.00424958	-1.11723
3	104093309	CLDN19	NSYN	missense	V->M	70.344	590.89	34507.2	0.010401	-31.2972
3	104170059	ENSBTAT00000006021	NSYN	missense	D->N	17.604	1246.36	33944	0.0182	-0.597144
3	104347766	ZMYND12	NSYN	missense	I->L	87.765	2092.32	32925.9	0.0323	-6.37601
3	106191566	LOC511494	NSYN	missense	I->T	0	257.033	34953	0.00365	0.477886
3	106317545	SMAP2	NSYN	missense	G->E	0	49.294	35160.7	0.0007	0.0692368
3	106317587	ENSBTAT00000029227	NSYN	missense	Y->F	42.2532	2313.36	32855.4	0.03405	-0.0580199
3	106500655	RLF	NSYN	missense	P->L	0	520.235	34630.8	0.0074	1.3032
3	106903768	OXCT2	NSYN	missense	R->W	0	267.482	34927.5	0.0038	0.503949
3	107138394	BMP8A	NSYN	missense	E->K	10.5474	1511.79	33635.7	0.0218	0.597742
3	107161676	ENSBTAT00000065198	NSYN	missense	L->F	133.574	3458.86	31558.6	0.053	-1.73204
3	107180612	MACF1	NSYN	missense	L->F	0	264.053	34942.9	0.00375	0.495267
3	107228154	MACF1	NSYN	missense	I->V	0	264.127	34952.9	0.00375	0.495361
3	107265721	MACF1	NSYN	missense	V->I	0	260.576	34948.9	0.00370037	0.48662
3	107283762	MACF1	NSYN	missense	L->P	0	80.6035	34964.4	0.00115	0.118741
3	107297752	ENSBTAT00000033270	NSYN	missense	R->Q	313.066	5315.09	29551.4	0.0844416	-2.13817
3	108904337	GNL2	NSYN	missense	I->M	1809.59	12230.6	21169.4	0.225077	-0.182249
3	109667200	GRIK3	NSYN	missense	V->L	3.5215	771.208	34440.3	0.01105	0.105685
3	110041572	ENSBTAT00000010509	NSYN	missense	T->M	31.671	2055.1	33103.2	0.0301	0.00928945
3	110236003	ENSBTAT00000002583	NSYN	missense	R->W	24.4636	1537.71	33385.8	0.0227	-0.511631
3	110236131	ENSBTAT00000002583	NSYN	missense	R->Q	7.0342	759.694	34404.3	0.011	-0.415178
3	110236141	ENSBTAT00000002583	NSYN	missense	S->P	575.853	6801.39	27735.8	0.11325	-4.26403
3	110764474	ENSBTAT00000002546	NSYN	missense	E->K	70.388	2864.79	32262.3	0.0426957	-0.230519
3	111191980	ENSBTAT00000061426	NSYN	missense	L->F	80.4195	3027.97	31856.6	0.0456	-0.276581
3	112591493	ENSBTAT00000007609	NSYN	missense	C->F	7.0316	1118.02	34032.9	0.0161	0.213764
3	113798458	ENSBTAT00000000172	NSYN	missense	R->C	0	274.279	34889.7	0.0039	0.521413
3	114232815	TRPM8	NSYN	missense	S->L	0	144.365	35066.6	0.00205	0.231781
3	116581386	IQCA1	NSYN	missense	R->C	0	323.996	34893	0.0046	0.653345
3	117506715	ENSBTAT00000002015	NSYN	missense	R->H	105.336	3153.06	31853.6	0.0479	-1.20642
3	117629153	MLPH	NSYN	missense	D->H	0	316.53	34853.5	0.0045	0.63324
3	117810657	LRRFIP1	NSYN	missense	S->L	10.5609	1221.54	33970.9	0.01765	0.0312657
3	117840087	LRRFIP1	LOF	splice-site	-	126.72	3252.48	31820.8	0.0498	-2.28745
3	118051241	SCLY	NSYN	missense	M->V	28.1248	1740.22	33387.7	0.02555	-0.336631
3	118056131	ENSBTAT00000013719	NSYN	missense	D->N	24.6295	1706.47	33453.9	0.02495	-0.163533
3	118199167	ENSBTAT00000002448	NSYN	missense	A->T	217.999	2633.29	31751.7	0.04435	-23.7283
3	118222501	PER2	NSYN	missense	T->A	24.6253	1741.36	33416.5	0.0254475	-0.103689
3	118280038	TRAF3IP1	NSYN	missense	E->Q	1213.26	9871.38	24082.4	0.17485	-2.5198
3	118298926	ENSBTAT00000048470	NSYN	missense	T->M	24.6463	1728.76	33455.6	0.02525	-0.126879
3	118299247	TRAF3IP1	NSYN	missense	A->V	21.1098	1727.49	33430.9	0.0251525	0.0643229
3	119949566	ENSBTAT00000056641	NSYN	missense	S->C	267.459	5173.22	29751.3	0.0811	-0.993699
3	120133591	OTOS	NSYN	missense	L->M	0	112.4	35012.6	0.0016	0.172947
3	120133663	OTOS	LOF	nonsense	E->*	3.5163	73.8423	35085.6	0.00115	-3.2136
3	120335698	ENSBTAT00000003637	NSYN	missense	V->M	3.512	491.68	34628.3	0.00709929	-0.381892
3	120708899	ENSBTAT00000006833	NSYN	missense	R->W	181.314	4009.82	30673.4	0.0627063	-1.96663
3	120791923	ENSBTAT00000018790	NSYN	missense	R->H	498.226	6835.8	27507	0.1124	-1.26932
3	121168177	ATG4B	NSYN	missense	P->S	0	3.5171	35167.5	5e-05	0.00461952
3	121213924	D2HGDH	NSYN	missense	V->M	0	151.442	35067.6	0.00215	0.245452
4	5360979	DDC	NSYN	missense	R->C	7.0418	1109.08	34089.4	0.0159516	0.195218
4	5376771	FIGNL1	NSYN	missense	R->L	77.3696	2890.81	32199.8	0.0433	-0.478621
4	7257578	ENSBTAT00000034269	NSYN	missense	K->E	28.1728	1648.11	33539.7	0.0242	-0.575726
4	7333141	ENSBTAT00000061018	NSYN	missense	T->I	0	507.11	34708.9	0.0072	1.25161
4	7339891	ENSBTAT00000061018	NSYN	missense	R->H	193.688	4247.05	30775.3	0.0658	-1.63398
4	7399710	ENSBTAT00000061018	NSYN	missense	E->D	73.7184	2555.57	32474.7	0.0385	-1.34274
4	7435562	ENSBTAT00000061018	NSYN	missense	R->C	151.429	3620.2	31444.4	0.0557	-2.15701
4	9094103	ENSBTAT00000063305	LOF	nonsense	L->*	204.027	5185.09	29787.9	0.0795	0.423343
4	9279567	ENSBTAT00000009791	NSYN	missense	Q->H	24.6512	1788.97	33402.4	0.0261	-0.0342282
4	9292553	ENSBTAT00000009791	NSYN	missense	R->Q	38.7398	1877.12	33305.7	0.0277472	-0.859443
4	9297972	ENSBTAT00000009791	NSYN	missense	S->F	14.0844	1070.41	34126.5	0.0156	-0.651355
4	9344500	LRRD1	LOF	nonsense	Q->*	0	17.598	35178.4	0.00025	0.0235968
4	9669985	PEX1	NSYN	missense	V->G	3.5169	393.893	34771.6	0.0057	-0.680247
4	10499211	CCDC132	NSYN	missense	R->L	66.7831	2520.18	32562	0.03775	-0.949128
4	11912229	PEG10	LOF	nonsense	R->*	70.426	3169.17	31973.4	0.047	0.261018
4	11920317	PEG10	NSYN	missense	E->G	31.6926	1433.21	33749.1	0.02125	-1.86172
4	12308388	PPP1R9A	NSYN	missense	V->I	7.0412	658.352	34540.6	0.00955	-0.715717
4	12351603	PPP1R9A	NSYN	missense	R->G	10.5537	1291.07	33877.4	0.01865	0.138149
4	12478649	PON3	NSYN	missense	M->T	14.0836	119.711	35078.7	0.00209979	-11.7156
4	13235608	DYNC1I1	NSYN	missense	V->M	24.6526	1947.56	33245.8	0.02835	0.208046
4	17124908	ENSBTAT00000040129	NSYN	missense	C->W	52.818	2345.12	32814.1	0.0348	-0.540594
4	19485462	THSD7A	NSYN	missense	C->Y	98.5992	2901.63	32213.8	0.044	-1.83733
4	28456701	TWISTNB	NSYN	missense	E->A	0	59.7907	35111.2	0.00085	0.085319
4	28837196	ENSBTAT00000004882	NSYN	missense	H->Y	119.714	3936.48	31150.3	0.0593059	0.101119
4	30619315	ENSBTAT00000061103	NSYN	missense	H->R	3.5218	623.359	34591.1	0.00895	-0.109877
4	30623890	ENSBTAT00000061103	NSYN	missense	G->V	112.486	2910.59	32128.9	0.0446	-3.027
4	30784197	ENSBTAT00000061103	NSYN	missense	A->G	0	813.259	34392.7	0.01155	2.66209
4	30802707	CDCA7L	NSYN	missense	P->R	0	116.19	35092.8	0.00165	0.179474
4	31045224	ENSBTAT00000033832	NSYN	missense	D->N	206.358	4609.84	30156.3	0.0718072	-0.746631
4	32029259	GPNMB	NSYN	missense	P->L	169.032	4106.07	30936.4	0.0631063	-1.02198
4	33047384	ENSBTAT00000020806	NSYN	missense	E->K	0	429.55	34779.5	0.0061	0.97673
4	33047402	ENSBTAT00000020806	NSYN	missense	I->V	24.6155	745.498	34394.9	0.0113	-5.51079
4	37833154	ENSBTAT00000033801	NSYN	missense	R->Q	10.5645	905.025	34299.4	0.01315	-0.608993
4	37839014	ENSBTAT00000033801	NSYN	missense	Y->C	7.0412	341.498	34857.5	0.00505	-2.41587
4	37839893	ENSBTAT00000033801	NSYN	missense	G->E	10.563	1024.61	34178.3	0.0148485	-0.300277
4	38806629	CACNA2D1	NSYN	missense	E->D	3.5218	454.312	34760.2	0.00655	-0.488373
4	40453008	ENSBTAT00000064572	NSYN	missense	K->E	24.2592	1621.9	33013.3	0.0240976	-0.277329
4	44158747	CCDC146	NSYN	missense	R->H	3.5217	450.778	34762.7	0.0065	-0.498666
4	46564228	MLL5	NSYN	missense	T->P	59.7227	2965.06	32106.2	0.0439	0.315661
4	48554442	HBP1	NSYN	missense	R->C	0	56.3328	35151.7	0.0008	0.0799381
4	49405517	ENSBTAT00000047111	NSYN	missense	H->L	63.369	2703.74	32437.9	0.0402	-0.259042
4	49409854	ENSBTAT00000047110	NSYN	missense	C->R	17.6045	1471.74	33719.7	0.0214	-0.0983895
4	49569734	NRCAM	NSYN	missense	N->S	7.0414	830.885	34369.1	0.012	-0.252657
4	51936179	MET	NSYN	missense	N->Y	0	88.02	35120	0.00125	0.1307
4	60493048	ELMO1	NSYN	missense	Q->K	10.5648	993.091	34212.3	0.0144	-0.372781
4	61220955	ENSBTAT00000046371	NSYN	missense	P->Q	24.6351	1812.44	33352.4	0.0264526	-0.000569702
4	62346174	DPY19L2	NSYN	missense	E->K	3.5209	549.26	34659.7	0.00789921	-0.250402
4	63715370	BBS9	NSYN	missense	R->Q	246.463	4559.57	30403	0.07175	-2.94457
4	63715457	ENSBTAT00000008587	NSYN	missense	K->R	249.97	4559.31	30397.7	0.07185	-3.16039
4	65884888	FAM188B	NSYN	missense	G->R	3.5203	341.469	34858	0.00495	-0.886278
4	66807285	SCRN1	NSYN	missense	A->T	0	31.6962	35186.3	0.00045	0.0433824
4	66858561	ENSBTAT00000021581	NSYN	missense	E->K	3.5162	1005.63	34149.3	0.0144014	0.566897
4	67490150	ENSBTAT00000009404	NSYN	missense	P->L	3.5204	975.151	34225.3	0.01395	0.494104
4	74954413	ENSBTAT00000004561	NSYN	missense	D->Y	14.0856	1510.68	33689.2	0.02185	0.201742
4	77239894	ENSBTAT00000010646	NSYN	missense	A->T	28.1616	1411.6	33762.2	0.02085	-1.42397
4	77574050	ENSBTAT00000061036	NSYN	missense	R->C	24.4202	1493.12	33368.5	0.0221	-0.628428
4	77910536	POLM	NSYN	missense	G->W	517.175	6149.81	28515	0.1021	-6.83829
4	77912411	POLM	LOF	splice-site	-	17.598	1291.69	33886.7	0.01885	-0.471577
4	78319868	ENSBTAT00000028268	NSYN	missense	R->W	38.7277	2045.53	33122.7	0.03015	-0.381095
4	79758216	ENSBTAT00000033607	NSYN	missense	D->N	77.4708	2609.36	32527.2	0.03925	-1.44185
4	83185477	AMPH	NSYN	missense	T->M	38.7398	2056.73	33122.5	0.0303	-0.356846
4	83468369	ENSBTAT00000056695	NSYN	missense	F->I	10.4304	441.554	34316	0.00665	-3.05864
4	86057707	TSPAN12	NSYN	missense	K->R	529.089	6549.64	27498.8	0.110011	-3.65906
4	87245656	PTPRZ1	NSYN	missense	D->H	0	63.2772	35090.7	0.0009	0.0907736
4	87919000	RNF148	NSYN	missense	S->F	24.5686	1579.41	33494	0.0232	-0.423158
4	88642865	IQUB	NSYN	missense	E->Q	77.473	2926.37	32211.2	0.04375	-0.40167
4	88728328	ASB15	NSYN	missense	R->Q	801.716	7669.05	26695.7	0.131837	-6.81088
4	89884975	ENSBTAT00000017541	NSYN	missense	S->C	0	348.421	34845.6	0.00495	0.723334
4	92425793	ZNF800	NSYN	missense	K->N	0	366.215	34846.8	0.0052	0.775745
4	92618248	GCC1	NSYN	missense	R->C	42.1068	2505.35	32541.5	0.0369	0.256914
4	93516181	ENSBTAT00000013015	NSYN	missense	E->K	17.6075	1359.3	33841.6	0.019798	-0.311888
4	93623277	FLNC	NSYN	missense	V->M	65.8787	2818.91	31788.2	0.04255	-0.106046
4	93656036	ENSBTAT00000033567	NSYN	missense	Q->P	21.06	1063.53	34015.4	0.01575	-1.906
4	93665149	ENSBTAT00000066110	LOF	nonsense	R->*	21.0954	1149.7	33988.2	0.01695	-1.48056
4	93666838	ENSBTAT00000066110	NSYN	missense	P->S	10.5558	1037.99	34137.5	0.01505	-0.269742
4	93677350	ENSBTAT00000033567	NSYN	missense	R->W	10.56	1063.04	34126.4	0.0154	-0.219542
4	94107389	AHCYL2	NSYN	missense	G->A	66.8895	2619.25	32518.9	0.0391	-0.648388
4	94336691	NRF1	NSYN	missense	T->M	10.5651	1327.68	33875.2	0.0191519	0.198776
4	94637780	ZC3HC1	NSYN	missense	G->S	10.4457	1128.14	33680.4	0.0165	-0.0824002
4	96038677	ENSBTAT00000013799	NSYN	missense	P->R	10.5543	1104.68	34065.8	0.016	-0.141115
4	96038768	ENSBTAT00000013799	NSYN	missense	P->S	10.5615	1087.83	34106.6	0.01575	-0.172673
4	96629180	PLXNA4	NSYN	missense	D->N	0	3.5218	35214.5	5e-05	0.00462262
4	97825717	EXOC4	NSYN	missense	R->Q	0	17.609	35200.4	0.00025	0.0236043
4	99801711	LOC514257	NSYN	missense	V->M	28.0256	2357.65	32646.3	0.03445	0.943575
4	103334357	ENSBTAT00000028068	NSYN	missense	K->Q	3.5184	767.011	34413.5	0.011	0.100187
4	103463587	ZC3HAV1L	NSYN	missense	R->W	3.5214	591.595	34618.9	0.0085	-0.165948
4	103783164	ENSBTAT00000023628	NSYN	missense	H->Y	10.4763	1232.71	33681.3	0.0179482	0.0610741
4	104370916	ENSBTAT00000033494	NSYN	missense	P->S	10.5576	1474.54	33703.4	0.0212521	0.504264
4	105004665	ENSBTAT00000009043	NSYN	missense	R->T	119.296	3017.48	31953.7	0.0463954	-2.99046
4	105833214	ENSBTAT00000050790	NSYN	missense	D->E	0	137.342	35078.7	0.00195	0.218389
4	106144840	ENSBTAT00000065670	NSYN	missense	F->L	21.0414	1378.21	33669.7	0.02025	-0.609875
4	106385807	ENSBTAT00000033479	NSYN	missense	N->S	0	304.161	34656.8	0.00435	0.602
4	106990767	EPHB6	NSYN	missense	E->D	10.5519	1125.54	34036.9	0.0163	-0.105413
4	113293195	ENSBTAT00000018668	NSYN	missense	G->R	17.541	1473.44	33591	0.0215	-0.0870069
4	113430163	ENSBTAT00000026440	NSYN	missense	P->L	112.586	3926.42	31147.5	0.0589941	0.282621
4	113439179	ENSBTAT00000043975	NSYN	missense	V->I	59.8587	2718.29	32429.3	0.040304	-0.0945399
4	113445111	SSPO	NSYN	missense	S->F	0	77.462	35132.5	0.0011	0.113306
4	113449671	SSPO	NSYN	missense	D->A	0	27.8728	34813.1	0.0004	0.0381481
4	113476577	SSPO	NSYN	missense	G->W	0	126.479	35006.5	0.0018	0.198416
4	113480775	ENSBTAT00000043975	NSYN	missense	P->L	334.906	5393.38	29157.7	0.0869	-2.56672
4	113506975	ZNF862	NSYN	missense	E->A	112.442	3882.75	31142.8	0.05845	0.208124
4	113522279	ENSBTAT00000054909	NSYN	missense	D->E	348.5	5382.39	29474.6	0.0863414	-3.47927
4	114116369	ENSBTAT00000055206	NSYN	missense	R->H	0	3.5198	35194.5	5e-05	0.0046213
4	114257531	ABP1	NSYN	missense	R->W	7.036	826.73	34346.2	0.01195	-0.259921
4	114566921	ENSBTAT00000025079	NSYN	missense	M->I	295.697	5040.93	29865.4	0.08	-2.82349
4	114615819	SMARCD3	NSYN	missense	V->I	10.539	1015.26	34107.7	0.0147485	-0.315429
4	115408096	ENSBTAT00000028347	NSYN	missense	R->W	0	77.4796	35140.5	0.0011	0.113321
4	115408131	ENSBTAT00000028347	NSYN	missense	T->M	49.2352	2373.84	32744.9	0.03515	-0.264962
4	115408426	ENSBTAT00000028347	NSYN	missense	Y->H	10.5624	943.574	34250.3	0.0137014	-0.498279
4	115798867	XRCC2	NSYN	missense	D->Y	0	260.569	34951.4	0.0037	0.486578
4	117411186	DPP6	NSYN	missense	A->T	0	183.056	35019.9	0.0026	0.30957
4	118003679	ENSBTAT00000028648	NSYN	missense	G->C	3.5043	627.27	34415.7	0.0090491	-0.0979773
4	120336070	ENSBTAT00000033340	NSYN	missense	T->M	886.939	7746.64	26562.4	0.13525	-10.0116
4	120357027	ENSBTAT00000033340	NSYN	missense	A->V	142.496	3969.02	30643.5	0.0612	-0.345723
5	1271874	ENSBTAT00000030417	NSYN	missense	Q->K	7.043	926.154	34281.8	0.01335	-0.0799351
5	1314946	TMEM19	NSYN	missense	K->T	102.01	3039.21	32031.3	0.0461046	-1.4604
5	2309986	ENSBTAT00000049552	NSYN	missense	R->H	17.532	1371	33672	0.020052	-0.27309
5	7661563	NAV3	NSYN	missense	D->G	161.929	4020.07	31020	0.0617	-1.00833
5	9899308	ENSBTAT00000048210	NSYN	missense	S->C	70.43	993.063	34151.5	0.0161	-19.0109
5	12082504	ENSBTAT00000011034	NSYN	missense	R->Q	0	21.12	35178.9	0.0003	0.0284662
5	14595970	SLC6A15	NSYN	missense	S->F	0	3.5218	35214.5	5e-05	0.00462262
5	14761161	LRRIQ1	NSYN	missense	W->L	24.6393	802.537	34375.3	0.0120988	-4.90048
5	14881534	LRRIQ1	NSYN	missense	R->G	34.94	2047.48	32857.6	0.0303	-0.139915
5	14881590	LRRIQ1	NSYN	missense	E->D	216.752	4597.24	30146	0.07195	-1.17027
5	17935576	CEP290	NSYN	missense	T->I	3.5142	593.9	34544.6	0.00855	-0.159237
5	18326615	KITLG	NSYN	missense	R->T	0	151.343	35044.7	0.00215	0.245355
5	19459586	GALNT4	NSYN	missense	H->Y	3.5219	669.161	34546.3	0.0096	-0.0386387
5	24872055	NDUFA12	NSYN	missense	N->H	0	17.5575	35093.9	0.000250025	0.0235701
5	25024630	ENSBTAT00000018650	NSYN	missense	P->R	17.6065	1405	33793.9	0.020448	-0.217186
5	25300864	USP44	NSYN	missense	P->L	3.5178	643.757	34530.7	0.00925	-0.075587
5	25637510	ENSBTAT00000003552	NSYN	missense	H->N	28.1064	449.702	34655.2	0.0072	-11.9541
5	27069391	ENSBTAT00000009070	NSYN	missense	P->H	10.551	3.517	35159.4	0.000349965	-16.6209
5	27262088	KRT78	NSYN	missense	L->F	13.9408	1003.74	33834.3	0.0148	-0.828687
5	27297081	KRT4	NSYN	missense	R->Q	0	426.089	34787.9	0.00605	0.965106
5	27490042	KRT74	NSYN	missense	D->Y	0	440.213	34776.8	0.00625	1.01247
5	27668414	KRT82	NSYN	missense	R->Q	28.172	1605.8	33584.5	0.0235976	-0.699703
5	28676368	BIN2	NSYN	missense	E->K	1837.44	9613.12	23749.4	0.18875	-27.9743
5	30410350	ENSBTAT00000025675	NSYN	missense	I->T	0	175.335	34891.7	0.0025	0.2942
5	30659024	ENSBTAT00000011203	NSYN	missense	H->N	70.412	3249.51	31886.1	0.04815	0.433841
5	31095415	RND1	NSYN	missense	R->H	0	116.206	35097.8	0.00165	0.179489
5	31168894	ADCY6	NSYN	missense	R->C	10.5618	978.727	34220.2	0.0141986	-0.407112
5	35877795	NELL2	NSYN	missense	T->N	0	59.7975	35115.2	0.00085	0.0853243
5	37289545	ADAMTS20	NSYN	missense	C->Y	0	207.615	34981.4	0.00295	0.36265
5	37332388	ADAMTS20	NSYN	missense	C->Y	24.6491	1912.07	33276.3	0.02785	0.146326
5	37603995	ENSBTAT00000063366	NSYN	missense	C->Y	7.0328	858.002	34295.4	0.0124012	-0.196015
5	38752558	YAF2	NSYN	missense	I->V	14.084	1320.38	33875.5	0.01915	-0.0860647
5	40904669	LRRK2	NSYN	missense	R->C	3.5216	468.373	34744.1	0.00675	-0.44831
5	41696622	ABCD2	NSYN	missense	A->P	0	3.521	35206.5	5e-05	0.00462209
5	43000936	PTPRR	NSYN	missense	V->I	14.0868	130.303	35072.6	0.00225	-11.2924
5	43125346	PTPRB	NSYN	missense	P->L	24.6463	1968.18	33219.7	0.0286471	0.247231
5	44047768	ENSBTAT00000003810	NSYN	missense	S->F	337.258	4946.44	29843.8	0.080008	-6.12826
5	47748587	HELB	NSYN	missense	P->S	0	95.0805	35119.9	0.00135	0.142583
5	48781846	ENSBTAT00000053178	NSYN	missense	T->I	66.8135	1765.28	33336.4	0.0269973	-5.75728
5	49181796	ENSBTAT00000015086	NSYN	missense	T->I	24.6288	1611.43	33544.4	0.0236024	-0.356803
5	49828919	ENSBTAT00000015786	NSYN	missense	P->L	296.582	5132.61	29462.8	0.08205	-2.21578
5	54926530	ENSBTAT00000002883	NSYN	missense	T->M	98.5936	3066.97	32042.9	0.0463546	-1.1273
5	56075482	OS9	NSYN	missense	R->Q	3.5163	886.108	34269.9	0.0127013	0.30899
5	56322488	GLI1	NSYN	missense	R->H	70.432	2440.47	32701.6	0.0366537	-1.57434
5	56323803	GLI1	NSYN	missense	S->C	3.5198	344.94	34849.5	0.005	-0.871263
5	56766103	ENSBTAT00000056411	NSYN	missense	R->C	0	267.55	34936.4	0.0038	0.504035
5	57333859	IL23A	NSYN	missense	D->N	263.993	4403.39	30531.6	0.07005	-5.3026
5	57409352	ANKRD52	NSYN	missense	R->W	38.7046	2329.31	32818	0.0342	0.105208
5	57541992	ERBB3	NSYN	missense	P->R	17.606	1813.42	33384.5	0.0262474	0.502011
5	57617112	ENSBTAT00000038192	NSYN	missense	T->M	73.7667	2497.53	32555.7	0.03765	-1.60286
5	57640735	SUOX	NSYN	missense	L->Q	0	443.633	34765.4	0.0063	1.02428
5	57676232	PMEL	NSYN	missense	R->C	38.7387	2384.19	32794.1	0.03495	0.194732
5	57769141	ENSBTAT00000027541	NSYN	missense	K->R	232.379	4059.6	30917	0.06425	-5.59163
5	57882393	ITGA7	NSYN	missense	F->L	63.2664	2787.24	32297.5	0.04145	-0.0997554
5	59881757	ENSBTAT00000053805	NSYN	missense	A->V	0	66.842	35113.2	0.00095	0.0963418
5	60292567	ENSBTAT00000006753	NSYN	missense	S->N	63.387	2605.91	32545.7	0.0388	-0.483849
5	60635654	HAL	NSYN	missense	A->S	56.1648	2337.86	32709	0.0349	-0.778679
5	61273324	ENSBTAT00000020972	NSYN	missense	T->I	38.709	1214.06	33940.8	0.0183482	-4.87847
5	65568559	ENSBTAT00000004204	NSYN	missense	R->C	21.1272	1419.04	33775.4	0.0207479	-0.513557
5	65924572	GNPTAB	NSYN	missense	R->G	31.5927	1688.45	33383	0.02495	-0.776488
5	65996181	GNPTAB	NSYN	missense	S->T	73.9116	2787.52	32334.6	0.0417	-0.575692
5	66306515	ENSBTAT00000061381	LOF	nonsense	S->*	0	123.263	35094.7	0.00175	0.192243
5	67774568	STAB2	NSYN	missense	T->I	63.369	2640.38	32501.3	0.0393	-0.397557
5	67884785	ENSBTAT00000040243	NSYN	missense	E->G	63.3348	2501.72	32620.9	0.03735	-0.773296
5	68261633	ENSBTAT00000064242	NSYN	missense	T->M	3.5217	690.253	34526.7	0.00989901	-0.00935689
5	69049545	APPL2	NSYN	missense	P->S	218.271	4823.09	30163.6	0.0747	-0.555845
5	70442702	ENSBTAT00000029270	NSYN	missense	L->F	14.0868	1218.51	33984.4	0.0177	-0.273144
5	71926706	SYN3	NSYN	missense	R->W	3.5213	630.313	34579.2	0.00905	-0.0981856
5	74998032	ENSBTAT00000016190	NSYN	missense	A->P	10.4379	3.4793	34782.6	0.000349965	-16.4515
5	75741403	CSF2RB	NSYN	missense	T->A	0	168.85	35008.2	0.0024	0.280341
5	75744035	CSF2RB	NSYN	missense	S->N	3.5142	664.184	34474.3	0.00955	-0.0436863
5	75997501	C1QTNF6	NSYN	missense	G->E	21.1152	2231.17	32939.7	0.0323	1.32204
5	76013369	ENSBTAT00000011728	NSYN	missense	P->S	13.946	1767.66	33083.4	0.02575	0.838754
5	77632752	ENSBTAT00000007175	LOF	splice-site	-	31.662	2346.51	32801.8	0.03425	0.569003
5	80227398	TMTC1	NSYN	missense	T->M	0	130.299	35082.2	0.00185019	0.205213
5	80544577	ENSBTAT00000007060	NSYN	missense	R->C	0	123.267	35095.7	0.00175	0.192246
5	81689601	CCDC91	NSYN	missense	L->F	10.5603	989.148	34197.8	0.0143514	-0.381007
5	82539655	ENSBTAT00000029688	NSYN	missense	Y->N	17.6075	1207.87	33989.5	0.01765	-0.714317
5	82542699	ENSBTAT00000005615	NSYN	missense	V->M	154.911	4122.74	30929.3	0.06295	-0.438621
5	84291246	ENSBTAT00000029308	NSYN	missense	R->Q	116.134	2702.75	32376.6	0.0416958	-5.00055
5	84863385	ENSBTAT00000000995	NSYN	missense	T->M	70.434	2525.06	32621.5	0.03785	-1.21834
5	89089628	C5H12orf39	NSYN	missense	N->K	3.5216	450.765	34761.7	0.0065	-0.498656
5	89217533	IAPP	NSYN	missense	R->P	84.5016	862.62	34261.9	0.01465	-28.765
5	89273641	SLCO1A2	NSYN	missense	N->H	0	63.387	35151.6	0.0009	0.0908595
5	91881897	ENSBTAT00000063303	NSYN	missense	D->Y	0	165.529	35053.5	0.00235	0.273413
5	92006908	PIK3C2G	NSYN	missense	A->V	49.3024	1877.01	33289.7	0.02805	-2.04575
5	92218488	PIK3C2G	LOF	nonsense	Q->*	10.5657	848.778	34359.7	0.01235	-0.789995
5	92260276	PIK3C2G	LOF	splice-site	-	0	45.7535	35149.2	0.00065	0.0639479
5	94319926	DERA	NSYN	missense	R->H	10.5654	1274.89	33932.5	0.0184	0.109773
5	94721790	ENSBTAT00000000479	LOF	nonsense	Y->*	0	235.941	34979.1	0.00335	0.427154
5	95500301	ENSBTAT00000065211	LOF	splice-site	-	0	49.2912	35158.7	0.0007	0.0692347
5	95542873	WBP11	NSYN	missense	P->L	0	3.5039	35035.5	5e-05	0.0046108
5	97404273	GPRC5D	NSYN	missense	G->S	0	714.743	34494.3	0.01015	2.15056
5	97932565	MANSC1	NSYN	missense	E->K	38.6452	878.3	34211.5	0.0136014	-8.87548
5	100388766	ENSBTAT00000017022	NSYN	missense	E->D	70.432	2651.76	32493.8	0.03965	-0.771457
5	101249365	ENSBTAT00000037743	NSYN	missense	R->W	88.0475	3159.14	31971.8	0.04735	-0.321169
5	101324190	A2M	NSYN	missense	L->F	45.7483	2069.23	33079.5	0.0306969	-0.84166
5	102020138	FOXJ2	NSYN	missense	G->R	0	228.885	34984.1	0.00325	0.410697
5	102421580	ENSBTAT00000055624	NSYN	missense	E->K	0	3.5054	35050.5	5e-05	0.00461179
5	102965003	ENSBTAT00000051899	NSYN	missense	G->S	0	267.664	34951.3	0.0038	0.504178
5	103108609	WC1.3	NSYN	missense	A->V	177.47	4680.33	29940.2	0.07235	0.0942365
5	103110081	WC1.3	NSYN	missense	T->A	186.099	4550.64	30376.3	0.0701	-0.32772
5	103589033	CLSTN3	NSYN	missense	G->R	24.6197	492.394	34657.5	0.00769923	-9.20645
5	103746567	ENSBTAT00000011362	NSYN	missense	T->M	245.731	4876.55	29491.2	0.0775422	-1.14095
5	103909482	LRRC23	NSYN	missense	L->V	0	158.085	34971.9	0.00225	0.258921
5	104040236	PTMS	NSYN	missense	G->S	0	73.8276	35082.2	0.00105	0.107522
5	104061217	MLF2	LOF	nonsense	Y->*	0	70.276	35067.7	0.001	0.101859
5	104151951	ENSBTAT00000022686	NSYN	missense	T->A	0	661.948	34548.1	0.0094	1.89918
5	104192344	ENSBTAT00000019612	NSYN	missense	G->S	0	412.039	34801.4	0.00585059	0.918985
5	104648087	VWF	NSYN	missense	A->E	7.0298	857.636	34284.3	0.0124	-0.19605
5	104682197	VWF	NSYN	missense	V->M	35.216	1753.76	33427	0.0259	-0.935351
5	104691542	ENSBTAT00000016273	NSYN	missense	P->S	31.6557	1751.62	33393.2	0.0257974	-0.597127
5	107377551	RHNO1	NSYN	missense	H->Y	52.8015	2365.51	32782.7	0.0351	-0.485218
5	107476299	ENSBTAT00000009329	NSYN	missense	D->G	130.192	3110.53	31946.3	0.0479	-3.45771
5	107626237	ENSBTAT00000025372	LOF	nonsense	R->*	0	281.736	34935.3	0.004	0.539965
5	107769810	KDM5A	NSYN	missense	P->L	0	91.5278	35111.5	0.0013	0.136596
5	107780004	KDM5A	NSYN	missense	D->G	0	193.567	35000.4	0.00275	0.331953
5	108167792	ENSBTAT00000006875	NSYN	missense	S->F	95.0778	3292.51	31826.4	0.04945	-0.300161
5	108198407	ENSBTAT00000006875	NSYN	missense	R->Q	3.5216	493.024	34723	0.00709929	-0.382559
5	108210163	ENSBTAT00000055617	NSYN	missense	R->M	3.5186	499.641	34682.8	0.0072	-0.364438
5	108210820	RAD52	NSYN	missense	S->R	7.032	411.372	34741.6	0.00605	-1.89294
5	108613343	FBXL14	NSYN	missense	V->G	0	3.5133	35129.5	5e-05	0.00461701
5	108779919	ENSBTAT00000037708	NSYN	missense	E->K	0	552.389	34631.6	0.00785	1.42822
5	109385787	ENSBTAT00000014695	NSYN	missense	H->Y	7.0362	710.656	34463.3	0.0103	-0.549764
5	109454455	ENSBTAT00000023021	NSYN	missense	V->G	0	3.5158	35154.5	5e-05	0.00461866
5	109992495	ENSBTAT00000016495	LOF	splice-site	-	0	3.5103	35099.5	5e-05	0.00461503
5	110041883	ENSBTAT00000042716	NSYN	missense	Q->R	10.5567	348.371	34833.6	0.00524948	-4.11057
5	110052417	ENSBTAT00000042716	NSYN	missense	I->T	151.377	4037.9	31014.7	0.06165	-0.534946
5	111110071	CBX7	NSYN	missense	A->V	0	77.429	35117.6	0.0011	0.11328
5	111456520	SMCR7L	NSYN	missense	T->I	0	10.548	35149.5	0.00015	0.0140031
5	113432466	TNFRSF13C	NSYN	missense	A->V	455.689	5650.54	28946.8	0.0936	-7.71405
5	113567683	FAM109B	NSYN	missense	E->Q	31.6917	221.842	34963	0.0040496	-21.9017
5	113611450	MGC127055	NSYN	missense	E->K	0	3.5211	35207.5	5e-05	0.00462216
5	113977311	RRP7A	NSYN	missense	R->G	7.0426	968.357	34237.6	0.01395	-0.0180738
5	115060129	ENSBTAT00000066219	NSYN	missense	A->S	0	3.5172	35168.5	5e-05	0.00461958
5	115060186	ENSBTAT00000066219	NSYN	missense	H->N	346.797	5370.1	29313.1	0.08655	-3.3706
5	115521404	PARVB	NSYN	missense	V->A	52.7685	344.754	34778	0.00640064	-31.2914
5	116422227	ENSBTAT00000013081	NSYN	missense	V->M	87.8275	1271.74	33767.9	0.0206021	-19.0657
5	116459449	FAM118A	LOF	extension	*->L	17.604	605.578	34584.8	0.0091	-4.41997
5	117683083	ENSBTAT00000009339	NSYN	missense	K->N	42.2568	933.171	34238.6	0.01445	-9.37444
5	117708260	ENSBTAT00000010610	NSYN	missense	A->V	59.7159	3519.73	31547.6	0.0518	2.16171
5	117770939	ENSBTAT00000010571	NSYN	missense	S->C	84.4368	2645.69	32451.9	0.04	-1.86954
5	119874723	ENSBTAT00000034474	LOF	splice-site	-	0	3.4836	34832.5	5e-05	0.00459735
5	119875142	ENSBTAT00000034474	NSYN	missense	Q->L	0	73.9221	35127.1	0.00105	0.107598
5	120017498	LMF2	NSYN	missense	A->T	59.3997	3211.08	31670.5	0.04765	1.0124
5	120017685	LMF2	NSYN	missense	P->S	10.4352	1040.04	33730	0.0152515	-0.238841
5	120133318	MAPK8IP2	NSYN	missense	R->C	7.035	907.515	34260.4	0.0131	-0.1082
5	120857288	ENSBTAT00000065149	NSYN	missense	K->N	52.797	1474.8	33670.4	0.02245	-5.68717
5	120858496	ENSBTAT00000065149	NSYN	missense	Y->H	0	183.076	35023.9	0.0026	0.309592
6	2147034	TKTL2	NSYN	missense	H->Q	45.7639	2538.14	32619.1	0.03735	0.13515
6	2147761	TKTL2	NSYN	missense	L->V	45.7847	2532.25	32637.4	0.0372537	0.123785
6	2386705	NPY5R	NSYN	missense	E->G	14.074	1002.77	34168.2	0.01465	-0.871435
6	12803704	ENSBTAT00000023672	NSYN	missense	G->R	10.5645	827.553	34376.9	0.01205	-0.864421
6	13410979	ENSBTAT00000063504	NSYN	missense	R->H	14.0308	1157.54	33905.4	0.0169	-0.39994
6	13411076	ENSBTAT00000063504	NSYN	missense	A->T	10.5651	1063.55	34139.4	0.0154015	-0.219498
6	14306130	ENSBTAT00000013457	NSYN	missense	A->T	45.0957	2036.24	32607.7	0.03065	-0.844193
6	14342337	ENSBTAT00000013457	NSYN	missense	D->N	45.7158	1972.81	33147.5	0.02935	-1.1842
6	16867546	ENSBTAT00000016642	NSYN	missense	K->R	3.5186	552.42	34630.1	0.00795	-0.242762
6	17727745	AGXT2L1	NSYN	missense	S->C	0	56.16	35043.8	0.0008	0.0798055
6	20203875	ENSBTAT00000005539	NSYN	missense	P->L	63.3834	3003.67	32142.4	0.0444544	0.226682
6	20861785	ENSBTAT00000047794	NSYN	missense	V->D	81.0014	2789.27	32351.3	0.0418958	-1.00195
6	23014271	ENSBTAT00000063749	NSYN	missense	R->Q	14.0872	1155.15	34048.8	0.0168	-0.418297
6	23404303	MANBA	NSYN	missense	I->T	56.32	2632.96	32510.7	0.039	-0.102521
6	23422202	MANBA	NSYN	missense	S->L	17.6045	341.527	34853.4	0.00534947	-8.2063
6	31431815	PDLIM5	NSYN	missense	C->Y	3.5204	506.938	34693.5	0.0073	-0.347103
6	35765653	CCSER1	NSYN	missense	L->M	0	77.418	35112.6	0.0011	0.113271
6	36160224	ENSBTAT00000047683	NSYN	missense	Q->H	112.528	3340.68	31711.8	0.0507	-0.949195
6	36199302	MMRN1	NSYN	missense	T->A	161.69	4365.63	30626.2	0.0666933	-0.116906
6	37452164	FAM13A	NSYN	missense	F->V	267.505	5072.03	29862	0.079642	-1.37916
6	38627468	ENSBTAT00000007791	NSYN	missense	S->I	0	84.2736	35029.7	0.0012	0.124661
6	38670534	ENSBTAT00000007791	NSYN	missense	L->P	144.222	4266.85	30764.9	0.06475	0.0712092
6	44875999	PPARGC1A	NSYN	missense	S->L	0	190.177	35027.8	0.0027	0.324555
6	46504214	ANAPC4	NSYN	missense	R->P	0	3.5183	35179.5	5e-05	0.00462031
6	46865845	ENSBTAT00000002970	NSYN	missense	L->M	35.209	2003.39	33170.4	0.02945	-0.252294
6	57250944	ENSBTAT00000047153	NSYN	missense	K->T	343.343	5623.12	29068.5	0.09005	-1.8046
6	58471273	ENSBTAT00000001952	NSYN	missense	R->H	21.1308	1211.5	33985.4	0.0178	-1.21776
6	60043644	WDR19	NSYN	missense	D->Y	24.6323	1960.03	33204.3	0.02855	0.234007
6	61356003	ENSBTAT00000061142	NSYN	missense	P->R	186.581	4534.28	30483.1	0.0697	-0.391475
6	62130271	LIMCH1	NSYN	missense	T->M	31.6962	1803.16	33383.1	0.0265	-0.465093
6	62894492	ATP8A1	NSYN	missense	V->M	10.5639	922.581	34279.9	0.0134	-0.557398
6	63303442	HTATSF1	NSYN	missense	E->K	0	454.119	34748.9	0.00645	1.06051
6	67995745	ENSBTAT00000002847	NSYN	missense	S->F	56.2992	2628.47	32498.7	0.0389539	-0.107974
6	68292259	ENSBTAT00000061348	NSYN	missense	T->M	42.258	2148.11	33024.6	0.0317	-0.368569
6	68886403	FRYL	NSYN	missense	P->L	0	535.192	34671.3	0.00760076	1.35948
6	70570695	SCFD2	NSYN	missense	G->D	1063.07	8945.81	24728.6	0.159366	-4.62498
6	87705347	AMBN	NSYN	missense	R->C	7.0356	172.372	34998.6	0.00265	-4.37604
6	90304507	AFM	NSYN	missense	R->C	21.0702	1773.41	33322.5	0.02585	0.14158
6	91130494	ENSBTAT00000024140	NSYN	missense	T->N	732.16	7694.72	26776.6	0.130087	-3.92658
6	92325244	USO1	NSYN	missense	I->T	137.12	3839.36	31186	0.0584942	-0.540021
6	92967875	ENSBTAT00000013713	NSYN	missense	V->I	119.677	3597.34	31478.5	0.0545055	-0.513927
6	93032544	ENSBTAT00000016131	NSYN	missense	R->Q	3.5213	573.972	34635.5	0.00825	-0.199713
6	93365696	SHROOM3	NSYN	missense	G->E	0	415.561	34801.4	0.0059	0.930382
6	93365882	SHROOM3	NSYN	missense	G->A	0	84.4944	35121.5	0.0012	0.124844
6	95092441	ENSBTAT00000045455	NSYN	missense	Y->H	35.212	1873.28	33300	0.0276028	-0.561189
6	96723572	FGF5	NSYN	missense	S->F	0	228.644	34943.8	0.00325033	0.410445
6	96745803	FGF5	NSYN	missense	T->K	0	21.1308	35196.9	0.0003	0.0284737
6	99020011	ENOPH1	NSYN	missense	A->V	0	49.3052	35168.7	0.0007	0.0692453
6	99517558	ENSBTAT00000030398	NSYN	missense	S->L	24.6491	1623.32	33565	0.02375	-0.333266
6	99573363	LIN54	NSYN	missense	I->V	0	133.661	35040.3	0.0019	0.211618
6	103415739	PTPN13	NSYN	missense	S->I	471.747	6604.46	28128.8	0.1072	-1.68523
6	103856929	ENSBTAT00000003191	NSYN	missense	S->F	7.0428	683.152	34523.8	0.0099	-0.635555
6	104167497	SPARCL1	NSYN	missense	L->V	0	190.129	35018.9	0.0027	0.324503
6	104686438	ENSBTAT00000066249	NSYN	missense	T->A	0	3.5131	35127.5	5e-05	0.00461688
6	104889886	JAKMIP1	NSYN	missense	L->M	38.4934	2495.07	32460.4	0.03675	0.454753
6	104991492	ENSBTAT00000028965	NSYN	missense	D->E	109.011	3298.48	31757.5	0.05	-0.904047
6	105015064	ENSBTAT00000028965	NSYN	missense	G->R	45.7808	2422.86	32747.4	0.0357	-0.0340183
6	105239913	EVC	NSYN	missense	E->K	28.1616	1777.7	33396.1	0.02605	-0.261501
6	105926868	ENSBTAT00000014829	NSYN	missense	T->R	24.4811	1325.48	33619.5	0.019652	-1.23504
6	106637680	CPZ	NSYN	missense	I->V	373.152	6283.74	28549.6	0.09984	-0.393349
6	107277197	HGFAC	NSYN	missense	P->S	0	274.552	34924.4	0.0039	0.52176
6	107289327	ENSBTAT00000022222	NSYN	missense	P->L	24.647	1401.36	33784	0.0206	-0.979884
6	107533936	ENSBTAT00000004759	NSYN	missense	E->K	14.066	1230.78	33923.7	0.0178982	-0.243967
6	107538225	OTOP1	NSYN	missense	S->C	274.7	5057.3	29886	0.0796	-1.74102
6	107678870	ENSBTAT00000001972	NSYN	missense	R->W	0	151.42	35062.6	0.00215	0.245431
6	107729823	ENSBTAT00000001972	NSYN	missense	S->F	0	151.433	35062	0.00215022	0.245458
6	107885114	ENSBTAT00000001970	NSYN	missense	P->L	3.5218	834.667	34376.3	0.0119512	0.211052
6	107935753	ENSBTAT00000028152	NSYN	missense	E->Q	3.5179	840.778	34334.7	0.01205	0.223375
6	107949212	ADD1	NSYN	missense	S->N	17.5515	1713.03	33372.4	0.0249	0.293709
6	108643736	ENSBTAT00000023023	NSYN	missense	R->L	140.06	3711.59	31163.4	0.057	-1.03613
6	108996617	GAK	NSYN	missense	S->L	3.5035	609.609	34421.9	0.0088	-0.12755
6	109366875	ENSBTAT00000016697	NSYN	missense	P->R	371.106	5976.21	28662.7	0.09595	-1.22611
6	113654913	BOD1L	NSYN	missense	R->C	0	161.938	35042.1	0.0023	0.266268
6	113679087	BOD1L	NSYN	missense	G->R	0	140.792	35057.2	0.002	0.224998
6	115523457	ENSBTAT00000024802	NSYN	missense	Y->C	10.5627	1334.42	33864	0.01925	0.211275
6	115526209	ENSBTAT00000024802	NSYN	missense	R->Q	264.067	4946.86	29998.1	0.07775	-1.78522
6	115553606	ENSBTAT00000024802	NSYN	missense	E->K	299.353	5018.56	29896.6	0.079758	-3.16444
6	116025778	PROM1	NSYN	missense	V->I	0	253.548	34961.5	0.0036	0.469316
6	118164182	ENSBTAT00000025878	NSYN	missense	A->T	186.602	4214.4	30807	0.06515	-1.41859
6	118212990	TBC1D14	NSYN	missense	P->L	0	186.655	35031.3	0.00265	0.317074
6	119345684	ENSBTAT00000066026	NSYN	missense	R->W	83.604	3037.61	31710.3	0.0460046	-0.371618
7	1334326	C7H5orf45	NSYN	missense	R->G	0	10.5603	35190.4	0.00015	0.0140114
7	1335423	SQSTM1	NSYN	missense	R->W	278.001	4792.88	30122.6	0.0759924	-3.36726
7	2184983	ENSBTAT00000021140	NSYN	missense	V->A	3.4673	759.339	33906.7	0.0110511	0.104844
7	2242733	ZNF879	NSYN	missense	V->I	178.73	4026.67	30839.6	0.06255	-1.79112
7	2586258	ENSBTAT00000002103	NSYN	missense	R->H	147.844	3787.63	31265.5	0.058	-1.18548
7	3153245	ENSBTAT00000014891	NSYN	missense	E->K	24.6505	214.812	34975.5	0.00375	-16.706
7	3340648	SNAP47	NSYN	missense	R->C	17.609	1366.46	33833.9	0.0199	-0.29643
7	3442656	ENSBTAT00000022760	NSYN	missense	T->A	17.6015	1485.57	33696.3	0.0216022	-0.0760748
7	3967045	ENSBTAT00000002312	NSYN	missense	E->D	55.9536	2119.24	32795.8	0.0319	-1.58623
7	4099522	ARMC6	NSYN	missense	Q->P	14.046	1323.84	33777.1	0.01925	-0.0749839
7	4216492	DDX49	NSYN	missense	R->W	31.6062	1717.27	33365.6	0.0253525	-0.688674
7	4531375	C7H19orf60	NSYN	missense	A->V	45.7756	1985.96	33180.3	0.0295	-1.14415
7	4571201	FKBP8	NSYN	missense	A->S	0	10.5507	35158.4	0.00015	0.0140049
7	4879213	ENSBTAT00000000218	NSYN	missense	S->P	338.569	5347.29	29214.6	0.0863086	-3.02262
7	4908780	CIST1	NSYN	missense	H->Y	84.468	3174.59	31939.5	0.0474953	-0.16094
7	5022827	ENSBTAT00000036459	NSYN	missense	D->N	3.5168	791.28	34373.2	0.01135	0.139156
7	5360853	MAP1S	NSYN	missense	E->K	3.5096	519.421	34573.1	0.0075	-0.312766
7	5361602	MAP1S	NSYN	missense	S->F	10.5102	1243.71	33783.3	0.0180482	0.0715658
7	5474361	COLGALT1	LOF	nonsense	R->*	0	274.685	34941.3	0.0039	0.521929
7	5501171	ENSBTAT00000025214	NSYN	missense	R->C	63.2394	2750.91	32318.8	0.04095	-0.158914
7	5502650	ENSBTAT00000025214	LOF	nonsense	Y->*	260.532	4728.3	30218.2	0.07455	-2.75519
7	5710408	GTPBP3	NSYN	missense	G->E	0	341.586	34873.4	0.00485	0.703229
7	5722470	ENSBTAT00000022706	NSYN	missense	R->W	101.854	3238.25	31781.9	0.049	-0.719322
7	5761170	ENSBTAT00000047445	NSYN	missense	T->M	7.0406	749.824	34446.1	0.01085	-0.442742
7	5773225	USHBP1	NSYN	missense	R->W	17.569	1721.76	33398.7	0.025	0.308021
7	5806443	MYO9B	NSYN	missense	R->W	3.5156	646.87	34509.1	0.00929907	-0.0701421
7	6081341	ENSBTAT00000047290	NSYN	missense	R->C	14.038	1186.21	33894.8	0.0173	-0.333979
7	6223709	NWD1	NSYN	missense	R->W	42.2568	1954.38	33217.4	0.02895	-0.923212
7	6380685	MED26	NSYN	missense	R->W	0	31.284	34728.7	0.00045	0.0430863
7	6534222	EPS15L1	NSYN	missense	P->S	14.0752	1266.77	33907.2	0.0184	-0.17599
7	7886492	ENSBTAT00000021412	NSYN	missense	G->D	203.052	4190.58	30615.4	0.06565	-2.36995
7	8396642	ENSBTAT00000040185	NSYN	missense	L->M	10.5582	1122.69	34060.8	0.01625	-0.111241
7	8565267	CYP4F2	NSYN	missense	D->N	66.8819	2770.32	32363.8	0.04125	-0.275143
7	8704118	ENSBTAT00000047024	NSYN	missense	P->L	21.1032	1695.29	33455.6	0.0247	0.0192402
7	8786568	ENSBTAT00000013781	NSYN	missense	Q->R	225.274	4604.03	30369.7	0.0718	-1.58006
7	8800299	AKAP8	NSYN	missense	S->C	80.9922	3119.96	32013	0.0466	-0.144543
7	8915543	EPHX3	NSYN	missense	T->I	0	63.36	35136.6	0.0009	0.0908383
7	9209947	ENSBTAT00000017953	NSYN	missense	A->V	0	552.923	34665.1	0.00785	1.42929
7	11632281	ENSBTAT00000027132	NSYN	missense	A->P	107.74	1713.42	32930.4	0.0277528	-16.0415
7	12866062	ENSBTAT00000007981	NSYN	missense	R->Q	91.5434	1352.03	33765.4	0.0218	-18.6117
7	12932897	ENSBTAT00000003269	NSYN	missense	E->Q	87.985	1281.06	33825	0.0207	-18.9446
7	12937815	MRI1	NSYN	missense	V->M	0	7.037	35178	0.0001	0.00928975
7	12941095	MRI1	NSYN	missense	V->I	0	207.686	34993.3	0.00295	0.362728
7	12977444	ENSBTAT00000003278	NSYN	missense	T->P	0	3.5159	35155.5	5e-05	0.00461873
7	13791076	DNASE2	NSYN	missense	R->C	7.033	1220.23	33937.7	0.01755	0.4169
7	14760385	ENSBTAT00000057086	NSYN	missense	H->N	56.1584	2425.34	32617.5	0.03615	-0.524123
7	14948132	ENSBTAT00000062997	LOF	nonsense	S->*	56.0464	2564.12	32408.8	0.0382	-0.200048
7	14948653	ENSBTAT00000062997	LOF	nonsense	C->*	45.5507	2613.91	32379.5	0.0386	0.296624
7	15302829	ENSBTAT00000053009	NSYN	missense	L->R	3.5187	767.077	34419.9	0.0109989	0.100132
7	15344797	ZNF177	NSYN	missense	T->I	0	214.799	34998.2	0.00305	0.378532
7	15445216	ENSBTAT00000053834	NSYN	missense	E->K	21.1284	1855.78	33337.1	0.02695	0.283027
7	15769950	COL5A3	NSYN	missense	A->P	14.0848	1253.55	33944.4	0.0182	-0.202454
7	15788327	COL5A3	NSYN	missense	R->W	0	387.321	34823.7	0.0055	0.840395
7	16886960	DOCK6	NSYN	missense	A->V	10.5159	1128.71	33913.8	0.0164	-0.0938365
7	16998619	EPOR	NSYN	missense	Y->C	10.5594	999.623	34187.8	0.0145	-0.355998
7	17021672	RGL3	NSYN	missense	A->T	10.5594	999.623	34187.8	0.0145	-0.355998
7	17084806	ENSBTAT00000019173	NSYN	missense	A->V	1174.74	8724.67	25167.6	0.1579	-11.343
7	17611619	ENSBTAT00000066296	NSYN	missense	P->R	3.5115	628.558	34486.4	0.0090491	-0.0980877
7	17701359	ENSBTAT00000011725	NSYN	missense	P->S	42.1644	2642.3	32452.5	0.0388	0.55458
7	18018486	ENSBTAT00000035613	NSYN	missense	C->Y	0	3.5194	35190.5	5e-05	0.00462104
7	18022294	ENSBTAT00000035613	NSYN	missense	L->M	214.751	3650.76	31339.5	0.05795	-7.76478
7	18159002	CERS4	NSYN	missense	R->Q	0	687.666	34397.3	0.0098	2.02547
7	18778830	ENSBTAT00000010390	NSYN	missense	E->A	3.5208	644.306	34556.7	0.00925093	-0.0755708
7	18957598	ENSBTAT00000018405	NSYN	missense	R->Q	0	249.743	34921.7	0.00355036	0.460449
7	18981234	GPR108	NSYN	missense	G->S	3.5212	679.592	34528.9	0.00975	-0.0237061
7	19691639	CAPS	NSYN	missense	D->Y	31.689	1922.47	33255.8	0.0282	-0.201204
7	19836742	HSD11B1L	NSYN	missense	R->C	3.5199	503.346	34692.1	0.00725	-0.355748
7	20513383	ENSBTAT00000015669	NSYN	missense	R->P	0	288.542	34899.5	0.0041	0.557928
7	20549204	TICAM1	NSYN	missense	S->F	17.549	1965.49	33115	0.0285	0.928843
7	21084349	SIRT6	NSYN	missense	T->M	0	211.254	34994.2	0.0030003	0.370637
7	21581760	GIPC3	NSYN	missense	V->G	0	3.5143	35139.5	5e-05	0.00461767
7	22088668	ZNF555	NSYN	missense	E->A	14.0828	1073.81	34119.1	0.01565	-0.640616
7	22110583	ENSBTAT00000000456	NSYN	missense	R->C	154.044	4320.23	30535.7	0.0661	-0.0219074
7	22460504	ENSBTAT00000000958	NSYN	missense	R->H	10.4892	1454.5	33495.5	0.0211021	0.477572
7	22668843	ENSBTAT00000013182	NSYN	missense	R->Q	1187.97	8825.41	25133.6	0.15935	-10.827
7	22735818	AP3D1	NSYN	missense	R->W	38.6716	1687.49	33429.8	0.0251	-1.60453
7	22766173	MOB3A	NSYN	missense	T->P	640.939	6658.06	27725	0.11335	-8.7678
7	23120647	RAD50	NSYN	missense	R->C	0	77.4752	35138.5	0.0011	0.113317
7	26313691	ENSBTAT00000044112	NSYN	missense	D->N	10.56	1094.72	34091.2	0.0158516	-0.159763
7	26329342	SLC27A6	LOF	nonsense	Q->*	35.218	2039.12	33143.7	0.02995	-0.184425
7	26840449	ENSBTAT00000020360	NSYN	missense	K->Q	14.0372	382.514	34696.4	0.00585	-5.49145
7	26842512	ENSBTAT00000020360	NSYN	missense	I->M	3.5182	696.604	34481.9	0.01	0
7	26904808	ENSBTAT00000020360	NSYN	missense	G->R	130.24	3604.48	31465.3	0.0549	-0.962573
7	27862467	MEGF10	NSYN	missense	T->K	17.5945	1509.61	33661.8	0.02195	-0.039551
7	32756424	SNCAIP	NSYN	missense	G->R	31.6602	1797.6	33348.7	0.02645	-0.473707
7	34616810	ENSBTAT00000016457	NSYN	missense	K->R	0	3.5058	35054.5	5e-05	0.00461205
7	39204119	NOP16	NSYN	missense	I->T	0	334.447	34870.6	0.00475	0.68294
7	39424159	ENSBTAT00000061410	NSYN	missense	D->V	3.5215	887.418	34324.1	0.0127	0.309187
7	40260318	F12	NSYN	missense	N->T	0	42.2568	35171.7	0.0006	0.0587431
7	41276847	ENSBTAT00000064375	NSYN	missense	M->V	52.8225	2574.22	32584.4	0.0380538	-0.0671715
7	41719166	TRIM7	NSYN	missense	V->L	10.3719	1299.94	33262.7	0.0191	0.190337
7	41779781	TRIM52	NSYN	missense	E->K	76.681	3872.39	30905.9	0.05775	2.25386
7	42049310	NLRP3	NSYN	missense	Q->K	0	253.476	34951.5	0.0036	0.469228
7	42623386	ENSBTAT00000009824	NSYN	missense	L->P	3.5216	281.728	34934.3	0.00409959	-1.17273
7	42637694	ENSBTAT00000009824	NSYN	missense	T->M	10.5198	1125.62	33929.9	0.01635	-0.0995152
7	44848826	ENSBTAT00000020032	NSYN	missense	R->W	3.5217	278.214	34935.3	0.00405	-1.19166
7	45070377	ENSBTAT00000054521	NSYN	missense	P->H	129.33	3715.61	31109.1	0.05685	-0.542635
7	45086258	ARID3A	NSYN	missense	G->S	35.176	2036.69	33104.1	0.02995	-0.184297
7	45176984	ABCA7	NSYN	missense	Y->F	3.5188	387.068	34797.4	0.0056	-0.705781
7	45186059	ENSBTAT00000027682	NSYN	missense	Q->H	0	295.772	34915.2	0.0042	0.576694
7	45738776	ATP8B3	NSYN	missense	V->I	3.5215	380.322	34831.2	0.0055	-0.732069
7	45772444	REXO1	NSYN	missense	L->V	3.5212	376.768	34831.7	0.00545	-0.745215
7	46035918	ENSBTAT00000035443	NSYN	missense	S->I	20.8326	1798.55	32898.1	0.0265027	0.220671
7	48858317	SLC25A48	LOF	nonsense	Q->*	0	49.2814	35151.7	0.0007	0.0692274
7	48976148	FBXL21	NSYN	missense	T->M	3.5169	1301.25	33860.7	0.0186019	1.41564
7	48983366	FBXL21	NSYN	missense	R->W	3.5105	1309.42	33792.1	0.01875	1.44921
7	49391367	TRPC7	NSYN	missense	D->N	1430.49	9129.35	24241.7	0.172267	-16.3688
7	50304249	SPOCK1	NSYN	missense	N->S	3.5072	694.426	34370.6	0.010001	4.58915e-05
7	51008144	ENSBTAT00000026700	NSYN	missense	K->E	21.129	1422.69	33771.2	0.0208	-0.504001
7	51175277	NME5	NSYN	missense	A->V	17.6045	348.569	34842.8	0.00545	-8.06882
7	51176094	NME5	NSYN	missense	A->T	281.744	5582.05	29354.2	0.08725	-0.253795
7	53614973	ENSBTAT00000063152	NSYN	missense	A->T	17.5865	1114.98	34040.4	0.01635	-1.03345
7	53854297	ENSBTAT00000052339	NSYN	missense	I->T	1390.24	9735.21	24070.5	0.1778	-8.0792
7	53934112	PCDHB6	LOF	frame-shift	INS	31.5531	1816.06	33214.9	0.0267973	-0.411805
7	53980258	ENSBTAT00000064522	NSYN	missense	L->P	10.557	1326.66	33852.8	0.01915	0.198566
7	54022290	PCDHB11	NSYN	missense	S->C	0	31.6647	35151.3	0.00045	0.0433598
7	54028235	ENSBTAT00000054682	NSYN	missense	A->V	4524.1	12664	18018.9	0.30835	-46.4456
7	54112559	ENSBTAT00000053597	NSYN	missense	R->Q	0	225.293	34976.7	0.0032	0.402485
7	54153289	ENSBTAT00000023076	NSYN	missense	T->M	3.5205	749.866	34448.1	0.0107511	0.0736626
7	54680255	KIAA0141	NSYN	missense	R->H	10.482	1121.57	33811.4	0.0163484	-0.0994114
7	54683059	KIAA0141	NSYN	missense	R->W	63.3528	2706.57	32422.6	0.040254	-0.251629
7	54723181	RNF14	NSYN	missense	P->L	24.6484	1662.01	33525.3	0.0243	-0.250832
7	54877727	ENSBTAT00000024632	NSYN	missense	R->K	593.847	7644.06	26288.1	0.1279	-0.411943
7	54987607	ENSBTAT00000016387	NSYN	missense	I->T	0	388.855	34643.1	0.00555	0.848285
7	61351182	SPINK5	NSYN	missense	N->S	140.808	3555.4	31502.3	0.0545055	-1.76478
7	61378396	SPINK5	NSYN	missense	D->V	10.5642	859.222	34344.2	0.0125	-0.754069
7	61387671	SPINK5	NSYN	missense	R->T	10.5648	912.094	34293.3	0.01325	-0.588102
7	61933230	HTR4	NSYN	missense	R->W	0	154.942	35059.1	0.0022	0.252335
7	62229226	ADRB2	NSYN	missense	P->L	17.5765	1448.3	33683.6	0.0211021	-0.1332
7	63167484	ENSBTAT00000017197	NSYN	missense	R->C	0	295.806	34919.2	0.0042	0.576738
7	63722316	ENSBTAT00000020259	NSYN	missense	P->L	3.5217	750.122	34463.4	0.01075	0.07362
7	64438109	CCDC69	NSYN	missense	A->T	3.5208	95.0616	35109.4	0.00145	-2.84094
7	64743228	FAT2	NSYN	missense	Q->H	10.5594	1052.42	34135	0.01525	-0.240653
7	64752605	FAT2	NSYN	missense	R->W	0	267.239	34895.8	0.0038	0.503644
7	64755855	FAT2	NSYN	missense	L->F	0	179.607	35037.4	0.00255	0.302282
7	64773895	FAT2	NSYN	missense	R->Q	0	295.789	34917.2	0.0042	0.576716
7	67999137	ENSBTAT00000011109	NSYN	missense	N->S	0	574.004	34641	0.00815	1.51504
7	68066507	ENSBTAT00000016037	NSYN	missense	L->F	98.5488	2583.39	32514.1	0.0395	-3.74298
7	70221292	HAVCR1	NSYN	missense	T->I	77.3432	1617.18	33461.5	0.0252	-9.84554
7	71296169	SOX30	NSYN	missense	R->Q	0	49.2856	35154.7	0.0007	0.0692305
7	75937465	GABRG2	NSYN	missense	G->R	0	168.907	35020.1	0.0024	0.2804
7	77302373	HMMR	NSYN	missense	D->N	3.5101	744.141	34353.3	0.0107	0.0683007
7	77329647	MAT2B	NSYN	missense	L->M	334.457	5977.98	28897.1	0.0943906	-0.386963
7	82526374	ENSBTAT00000035030	NSYN	missense	Y->H	7.0436	1000.19	34207.2	0.0144014	0.0243638
7	82733463	ENSBTAT00000019472	LOF	nonsense	R->*	0	316.926	34897.1	0.0045	0.633785
7	82835689	ENSBTAT00000006113	NSYN	missense	R->C	52.8225	2377.01	32785.2	0.03525	-0.458654
7	83133327	ENSBTAT00000010107	NSYN	missense	L->F	7.019	898.432	34193.1	0.0129987	-0.119892
7	83210525	MSH3	NSYN	missense	R->K	7.0356	464.35	34710.1	0.00679932	-1.5698
7	83434418	ENSBTAT00000035048	NSYN	missense	I->M	17.601	1443.28	33741.1	0.021	-0.145599
7	83571083	CKMT2	NSYN	missense	R->H	56.0912	2019.28	32981.6	0.0304	-2.11354
7	83576448	CKMT2	NSYN	missense	V->M	73.9515	2859.46	32281.6	0.0427	-0.397088
7	84548573	ATP6AP1L	NSYN	missense	D->N	10.5648	943.789	34261.6	0.0137	-0.498485
7	85298955	XRCC4	NSYN	missense	F->I	0	217.341	34837.7	0.0031	0.385373
7	85732218	VCAN	NSYN	missense	P->L	10.5612	932.906	34260.5	0.01355	-0.527443
7	85846230	HAPLN1	NSYN	missense	F->S	42.2496	2087.83	33077.9	0.03085	-0.516069
7	92303651	CETN3	NSYN	missense	R->G	10.5558	978.171	34197.3	0.0142	-0.406839
7	92513091	ENSBTAT00000007926	NSYN	missense	A->E	10.5531	956.814	34209.6	0.0139	-0.46058
7	92540480	ENSBTAT00000007926	NSYN	missense	D->A	0	63.3564	35134.6	0.0009	0.0908355
7	92541565	ENSBTAT00000007926	LOF	nonsense	R->*	0	10.5561	35176.4	0.00015	0.0140085
7	92544268	ENSBTAT00000007926	NSYN	missense	V->E	3.5217	570.515	34643	0.0082	-0.206716
7	92625179	ENSBTAT00000007926	NSYN	missense	L->P	246.225	4607.93	30320.8	0.0725	-2.63014
7	92650864	ENSBTAT00000007926	NSYN	missense	G->D	345.136	4877.69	29998.7	0.0790421	-7.47128
7	92693639	ENSBTAT00000007926	NSYN	missense	R->H	0	211.254	34997.7	0.003	0.370613
7	92693716	ENSBTAT00000007926	NSYN	missense	A->T	271.055	3840.54	31093.9	0.0622438	-12.2003
7	92872540	ENSBTAT00000011370	NSYN	missense	P->L	66.7565	1946.48	33118.3	0.029603	-4.13308
7	96212145	ENSBTAT00000000923	NSYN	missense	Y->D	10.4301	698.817	34057.8	0.01035	-1.35123
7	98583287	ERAP1	NSYN	missense	G->R	0	281.72	34933.3	0.004	0.539945
7	98588983	ERAP1	LOF	nonsense	W->*	0	292.293	34923.7	0.00415	0.567458
7	98951785	LIX1	NSYN	missense	E->K	0	80.9945	35134	0.00115	0.119062
7	99017561	RIOK2	LOF	nonsense	W->*	7.0388	911.525	34275.4	0.01315	-0.102442
7	104634730	PPIP5K2	NSYN	missense	R->W	17.6005	1446.76	33736.6	0.02105	-0.139483
7	104704892	C7H5orf30	NSYN	missense	R->H	0	235.9	34973.1	0.00335	0.427107
7	111442759	ENSBTAT00000042616	NSYN	missense	K->R	70.384	2741.46	32383.7	0.0409459	-0.509767
7	112334401	ENSBTAT00000042610	LOF	splice-site	-	1112.32	8141.76	25945.9	0.14725	-16.587
8	1311067	ENSBTAT00000018438	NSYN	missense	Y->C	0	165.402	35026.6	0.00235	0.273285
8	1794158	AADAT	NSYN	missense	C->Y	101.984	3530.77	31534.2	0.0531	-0.074994
8	5508228	ENSBTAT00000056644	NSYN	missense	R->S	0	527.1	34609.4	0.00750075	1.33006
8	7793855	ENSBTAT00000036775	NSYN	missense	R->Q	2137.13	11502.5	21568.4	0.22405	-9.21281
8	8512594	ENSBTAT00000026846	NSYN	missense	S->R	126.601	3815.62	31224.8	0.05785	-0.247555
8	8513547	ENSBTAT00000026846	NSYN	missense	S->Y	87.7325	2937.28	32064.5	0.0443544	-0.898176
8	8514672	ENSBTAT00000026846	NSYN	missense	A->V	10.4817	1187.93	33740.6	0.0173	-0.00188326
8	8587697	ENSBTAT00000049259	NSYN	missense	A->T	7.043	1133.92	34074	0.0163	0.239716
8	9426978	ENSBTAT00000022902	NSYN	missense	E->K	171.294	4544.54	30242.2	0.0699	-0.00928462
8	10627607	ENSBTAT00000015047	NSYN	missense	R->W	3.5207	630.205	34573.3	0.00905	-0.0981764
8	11001589	ENSBTAT00000010075	NSYN	missense	R->H	3.5198	531.49	34663	0.00765	-0.289018
8	11434686	ENSBTAT00000061377	LOF	nonsense	Q->*	59.8672	2820.8	32335.3	0.04175	0.0503212
8	11448278	ENSBTAT00000061377	LOF	splice-site	-	21.1278	1440.21	33751.7	0.02105	-0.458183
8	16750851	IFNK	NSYN	missense	L->P	253.397	5208.71	29731.9	0.0812	-0.485083
8	22147496	ENSBTAT00000055845	NSYN	missense	L->Q	346.262	5875.97	28753.8	0.0939	-0.875928
8	23254024	ENSBTAT00000065677	NSYN	missense	S->I	0	27.6256	34504.4	0.0004	0.0379716
8	27189135	ENSBTAT00000061355	NSYN	missense	L->P	70.312	1402.72	33683	0.02195	-11.0927
8	27976799	ENSBTAT00000004780	NSYN	missense	K->T	7.043	968.413	34239.5	0.01395	-0.0180743
8	29433977	FREM1	LOF	nonsense	R->*	3.5217	697.297	34516.2	0.01	-6.85017e-07
8	30029750	ENSBTAT00000011234	NSYN	missense	S->F	21.051	1308.67	33755.3	0.01925	-0.830591
8	31188367	MPDZ	NSYN	missense	H->Y	3.521	855.603	34347.4	0.0122512	0.249165
8	31582182	LURAP1L	NSYN	missense	E->D	0	298.648	34836.4	0.00425	0.585185
8	38636759	UHRF2	NSYN	missense	S->Y	3.5213	823.984	34385.5	0.0118	0.192464
8	38744355	IL33	NSYN	missense	G->V	10.5642	369.747	34833.7	0.00555	-3.86902
8	42120298	VLDLR	NSYN	missense	N->S	0	133.809	35079.2	0.0019	0.211756
8	44393864	DOCK8	NSYN	missense	H->L	38.731	2112.6	33058.7	0.0311	-0.237163
8	44411151	TSPAN3	NSYN	missense	F->L	0	149.769	34680.2	0.00215	0.243816
8	44846672	PGM5	NSYN	missense	E->K	17.609	1753.86	33446.5	0.0254	0.367066
8	45671773	ENSBTAT00000047115	LOF	splice-site	-	3.5215	158.468	35053	0.00235	-2.05785
8	45678993	TJP2	NSYN	missense	A->T	109.129	3432.29	31665.1	0.0518448	-0.518536
8	47316049	ENSBTAT00000061517	NSYN	missense	A->S	87.495	2474.36	32432.6	0.0378538	-3.12843
8	53046040	ENSBTAT00000017205	NSYN	missense	S->L	73.9536	2613.03	32529	0.0392	-1.15011
8	53046634	ENSBTAT00000017205	NSYN	missense	G->V	14.0716	1143.32	34021.6	0.01665	-0.444545
8	53048462	ENSBTAT00000017205	NSYN	missense	E->Q	3.5142	614.985	34523.5	0.00885	-0.121691
8	53048734	ENSBTAT00000017205	NSYN	missense	G->V	0	443.646	34766.4	0.0063	1.02431
8	58590175	ENSBTAT00000066014	LOF	nonsense	R->*	13.8848	1253.1	33445	0.01845	-0.168229
8	59755801	ENSBTAT00000061353	NSYN	missense	P->A	239.306	4757.96	30194.7	0.0744	-1.5367
8	59756865	ENSBTAT00000061353	NSYN	missense	Q->H	239.414	4753.08	30215.5	0.0743	-1.56777
8	60009488	UNC13B	NSYN	missense	Q->H	241.672	4721.37	30062	0.0743	-1.75123
8	60195616	RUSC2	NSYN	missense	E->G	27.7872	1653.34	33049.4	0.0246025	-0.494649
8	60262205	ENSBTAT00000015174	NSYN	missense	L->F	35.132	1679.31	33417.6	0.0249	-1.19801
8	60401096	ENSBTAT00000055552	NSYN	missense	G->W	0	84.4752	35113.5	0.0012	0.124828
8	62025431	FBXO10	NSYN	missense	G->S	38.7376	2169.31	33004.4	0.0319032	-0.133495
8	62044460	FBXO10	NSYN	missense	I->V	3.5212	813.397	34395.1	0.01165	0.174345
8	62437088	MCART1	NSYN	missense	M->V	0	21.1278	35191.9	0.0003	0.0284716
8	62892491	ENSBTAT00000027172	NSYN	missense	P->L	3.5211	651.404	34556.1	0.00935	-0.06474
8	62952593	MGC157266	NSYN	missense	G->R	0	45.7834	35172.2	0.00065	0.0639702
8	62957332	MGC157266	NSYN	missense	G->R	3.5213	757.079	34452.4	0.01085	0.0841369
8	63260701	TMOD1	NSYN	missense	T->M	285.144	5333.25	29584.6	0.08385	-1.01132
8	63546834	C8H9orf156	NSYN	missense	V->E	17.608	1715.02	33483.4	0.02485	0.28729
8	63557147	C8H9orf156	NSYN	missense	A->E	7.0304	242.549	34902.4	0.00365	-3.38649
8	63783148	TBC1D2	NSYN	missense	Q->R	1798.91	11977.5	21362.1	0.221628	-0.686321
8	63789638	TBC1D2	NSYN	missense	E->G	281.608	5273.11	29646.3	0.0829	-1.11002
8	64268293	ENSBTAT00000006765	NSYN	missense	Q->H	35.201	1929.01	33236.8	0.0284	-0.415997
8	64327600	GALNT12	NSYN	missense	R->Q	3.4881	59.2977	34821.7	0.000949905	-3.49844
8	64491630	COL15A1	NSYN	missense	D->N	0	528.24	34687.8	0.0075	1.33217
8	64999307	LOC539818	NSYN	missense	H->Q	3.5215	415.537	34799.5	0.0059994	-0.608571
8	65722117	INVS	NSYN	missense	I->T	7.0082	890.041	34144	0.0129	-0.131709
8	69851928	NPM2	NSYN	missense	Q->E	0	24.6344	35167.4	0.00035	0.0333802
8	70042286	PHYHIP	NSYN	missense	T->M	0	17.599	35180.4	0.00025	0.0235975
8	70397833	PDLIM2	NSYN	missense	R->C	17.608	1774.89	33423.5	0.0257	0.413113
8	70848032	ENSBTAT00000045250	NSYN	missense	E->K	0	3.5145	35141.5	5e-05	0.0046178
8	73087903	ENSBTAT00000001613	NSYN	missense	R->W	7.009	813.044	34224.9	0.0118	-0.281855
8	73818731	CDCA2	NSYN	missense	S->C	0	21.129	35193.9	0.0003	0.0284724
8	75094820	ENSBTAT00000024448	NSYN	missense	R->H	295.781	5535.33	29377.4	0.0870087	-0.674303
8	75681959	ENSBTAT00000013134	NSYN	missense	V->L	17.5485	1800.48	33275.5	0.0261526	0.484733
8	76025138	ENSBTAT00000020003	NSYN	missense	F->L	83.868	2813.07	32048.1	0.04265	-1.06593
8	76542942	NOL6	NSYN	missense	S->L	0	228.917	34989.1	0.00325	0.410735
8	76701036	UBAP2	NSYN	missense	P->S	28.1656	2172.27	33006.6	0.03165	0.419727
8	76978968	UBAP1	NSYN	missense	L->P	130.166	3648.17	31405.2	0.0555444	-0.811637
8	77091765	C8H9orf24	LOF	nonsense	L->*	0	169.032	35046	0.0024	0.280527
8	77368352	ENSBTAT00000019846	NSYN	missense	R->C	3.5215	971.934	34239.5	0.0139	0.486293
8	78204172	ENSBTAT00000064590	NSYN	missense	R->C	17.609	1493.24	33710.7	0.0216978	-0.0655741
8	78392391	ENSBTAT00000012912	NSYN	missense	T->K	0	549.229	34654.3	0.00780078	1.41499
8	78555045	C8H9orf64	NSYN	missense	T->S	38.7387	1979.2	33199.1	0.0292	-0.549818
8	84978904	CTSL2	NSYN	missense	L->F	0	267.505	34930.5	0.0038	0.503978
8	85848881	FGD3	NSYN	missense	E->V	80.9278	2892.29	32209.3	0.0434043	-0.660398
8	86045954	ENSBTAT00000060961	NSYN	missense	R->W	0	352.15	34859.3	0.0050005	0.733989
8	87006309	ENSBTAT00000044437	NSYN	missense	P->S	259.488	5270.42	29536.1	0.08255	-0.452633
8	87007194	ENSBTAT00000044437	NSYN	missense	V->I	147.903	3972.25	31091.3	0.0606061	-0.587985
8	87007599	ENSBTAT00000044437	NSYN	missense	L->I	3.4816	445.645	34366.9	0.0065	-0.494888
8	88000502	AUH	NSYN	missense	S->R	144.328	3780.69	31280.5	0.0577942	-1.03708
8	92930920	RNF20	LOF	nonsense	K->*	0	1144.52	34071.5	0.01625	4.79279
8	98334540	ZNF462	NSYN	missense	A->G	221.325	3987.37	30925.8	0.0630437	-5.18903
8	98339770	ENSBTAT00000025536	NSYN	missense	V->M	224.57	4136.99	30723.9	0.0653565	-4.24457
8	101647722	ENSBTAT00000001939	NSYN	missense	V->M	7.0416	1063.28	34137.7	0.0153	0.118242
8	102547878	ENSBTAT00000044290	NSYN	missense	V->M	208.35	4545.5	29971.1	0.07145	-0.96874
8	102796725	ENSBTAT00000061241	NSYN	missense	Q->L	28.1744	1774.99	33414.8	0.026	-0.268817
8	103383293	ENSBTAT00000022272	LOF	nonsense	Q->*	0	91.4836	35094.5	0.0013	0.136559
8	103669280	INIP	NSYN	missense	I->L	10.5636	1000.02	34201.4	0.0145	-0.356088
8	103782831	SNX30	NSYN	missense	R->Q	320.151	4541.27	29937.6	0.07445	-8.52401
8	103830884	ENSBTAT00000018168	NSYN	missense	V->L	3.5199	299.192	34896.3	0.00435	-1.08122
8	103831155	SLC46A2	NSYN	missense	M->I	10.5639	341.566	34857.3	0.00515052	-4.19743
8	105006344	AMBP	NSYN	missense	N->T	0	545.693	34656.8	0.00775078	1.40096
8	105036466	ENSBTAT00000020826	NSYN	missense	R->W	0	91.4056	35064.6	0.0013	0.136493
8	105040192	ENSBTAT00000020826	NSYN	missense	R->C	14.056	1444.25	33681.7	0.02095	0.0954947
8	105157381	ENSBTAT00000001200	NSYN	missense	P->S	98.4732	3868.59	31201.9	0.0578	0.696869
8	105353033	ENSBTAT00000013333	NSYN	missense	Y->C	0	102.094	35102.9	0.00145	0.154643
8	107326854	ENSBTAT00000061502	NSYN	missense	D->N	344.784	5273.78	29559.9	0.0847585	-4.00509
8	111745381	CDK5RAP2	NSYN	missense	R->Q	0	151.407	35059.6	0.00215	0.245418
8	112306641	C5	NSYN	missense	V->A	0	122.486	34873.5	0.00175	0.191534
8	112966037	TTC15	NSYN	missense	G->S	17.5795	1483.71	33661.2	0.0215978	-0.076258
8	112991381	TTC15	NSYN	missense	E->K	21.1242	1605.44	33576.9	0.0234023	-0.113579
9	7947013	ENSBTAT00000063222	NSYN	missense	E->K	3.5194	408.25	34785.7	0.00589941	-0.631865
9	10645610	ENSBTAT00000021778	LOF	extension	*->L	0	3.5166	35162.5	5e-05	0.00461919
9	11806314	ENSBTAT00000061208	NSYN	missense	R->G	98.5684	3020.42	32084	0.0457	-1.30576
9	13191859	MTO1	NSYN	missense	V->G	3.5197	591.31	34602.2	0.0085	-0.165902
9	13547247	ENSBTAT00000061271	NSYN	missense	S->N	109.12	3333.44	31757.4	0.05045	-0.801594
9	14965149	COL12A1	NSYN	missense	S->F	88.0225	2978.68	32142.3	0.0448	-0.797543
9	14966421	COL12A1	NSYN	missense	P->L	0	21.123	35183.9	0.0003	0.0284682
9	15058660	ENSBTAT00000006718	NSYN	missense	P->Q	10.5405	1250.81	33873.7	0.0181	0.0770423
9	15769648	IMPG1	NSYN	missense	L->Q	116.134	3512.16	31563.7	0.0532	-0.596576
9	19981168	TTK	NSYN	missense	T->I	7.0422	760.558	34443.4	0.011	-0.415484
9	19981247	TTK	NSYN	missense	D->E	10.5417	1563.69	33564.8	0.02255	0.735062
9	20058734	ENSBTAT00000063897	NSYN	missense	E->K	21.1266	130.281	35063.1	0.00244976	-17.6299
9	22326950	ENSBTAT00000038116	NSYN	missense	R->H	0	440.238	34778.8	0.00625	1.01251
9	23271553	ENSBTAT00000061076	NSYN	missense	E->D	10.5648	1155.08	34050.4	0.0167	-0.0612868
9	23787623	SNAP91	NSYN	missense	G->R	28.1552	1633	33532.8	0.024	-0.61545
9	30205821	ENSBTAT00000047950	NSYN	missense	T->I	908.366	7573.24	26726.4	0.13335	-13.3468
9	30254695	ENSBTAT00000047950	NSYN	missense	L->F	28.1144	1539.26	33579.1	0.0226977	-0.905972
9	30261859	ENSBTAT00000047950	NSYN	missense	P->L	0	246.519	34970.5	0.0035	0.452287
9	30277156	ENSBTAT00000047950	NSYN	missense	V->A	28.0408	1591.32	33431.6	0.0235	-0.718828
9	30366133	ENSBTAT00000047950	NSYN	missense	L->V	0	49.2562	35133.7	0.0007	0.0692084
9	33877707	ENSBTAT00000065858	NSYN	missense	R->W	27.644	2190.79	32336.6	0.0325	0.555195
9	38713882	LAMA4	NSYN	missense	N->T	77.3938	2733.41	32368.2	0.04105	-0.951031
9	38793952	LAMA4	NSYN	missense	S->Y	21.1224	1760.2	33422.7	0.0256	0.112997
9	39513576	REV3L	NSYN	missense	L->F	0	7.0398	35192	0.0001	0.00929161
9	39837202	RPF2	NSYN	missense	V->L	193.561	3916.98	31086	0.0611439	-3.45596
9	40254169	SLC22A16	NSYN	missense	G->R	179.551	3953.63	31072.8	0.06125	-2.25629
9	40997023	FIG4	NSYN	missense	R->C	0	24.5805	35090.4	0.00035	0.0333423
9	41162027	ENSBTAT00000013345	NSYN	missense	R->W	45.6794	2340.19	32752.1	0.0346	-0.156484
9	41196266	MICAL1	NSYN	missense	T->A	73.2186	2580.08	32212.7	0.0391	-1.16829
9	41384875	ENSBTAT00000064270	NSYN	missense	Q->R	3.5209	915.434	34290	0.0131	0.365449
9	41715399	ARMC2	LOF	nonsense	G->*	0	151.416	35061.6	0.00215	0.245427
9	44186544	ATG5	NSYN	missense	T->M	59.8434	3129.46	32012.7	0.04615	0.699616
9	45199853	PREP	NSYN	missense	G->D	70.432	2662.33	32483.2	0.0398	-0.738734
9	45786675	HACE1	NSYN	missense	S->N	0	151.437	35066.6	0.00215	0.245448
9	45803743	ENSBTAT00000002010	NSYN	missense	G->R	140.432	3791.66	31179.4	0.0579942	-0.802813
9	45811668	HACE1	NSYN	missense	R->H	0	52.8195	35160.2	0.00075	0.0745662
9	51012432	USP45	NSYN	missense	Y->F	31.6953	2049.63	33135.7	0.03	0
9	53352218	MMS22L	LOF	extension	*->W	0	197.064	34992.9	0.0028	0.339523
9	54045673	UFL1	NSYN	missense	V->A	3.5199	725.099	34466.9	0.010401	0.0381457
9	54045713	UFL1	NSYN	missense	H->D	0	3.5214	35210.5	5e-05	0.00462236
9	61106599	ENSBTAT00000056313	NSYN	missense	K->N	0	281.704	34931.3	0.004	0.539924
9	61299349	MDN1	NSYN	missense	G->R	348.322	5601.29	29230.9	0.089509	-2.17272
9	61400953	MDN1	NSYN	missense	C->S	70.434	2768.06	32378.5	0.0413	-0.447297
9	61464285	ANKRD6	NSYN	missense	R->C	158.468	4271.58	30781.4	0.0651565	-0.217377
9	63283218	RARS2	NSYN	missense	D->H	0	169.027	35045	0.0024	0.280522
9	63522716	ZNF292	NSYN	missense	R->W	0	161.998	35055	0.0023	0.266328
9	63763362	HTR1E	NSYN	missense	R->W	10.5657	1053.05	34155.4	0.01525	-0.240739
9	66192987	KIAA1009	NSYN	missense	K->M	70.408	2707.19	32426.4	0.04045	-0.604439
9	66210799	KIAA1009	NSYN	missense	H->Y	432.763	5562.59	29188.6	0.09135	-7.14327
9	68530668	ENSBTAT00000061257	NSYN	missense	S->F	7.0426	1102.17	34103.8	0.01585	0.182806
9	70792696	ENPP1	NSYN	missense	N->D	0	3.5206	35202.5	5e-05	0.00462183
9	70875490	CTGF	NSYN	missense	G->A	0	422.424	34779.6	0.006	0.953209
9	73145661	TBPL1	NSYN	missense	R->C	119.734	3243.39	31856.4	0.0494451	-1.81099
9	73994476	ALDH8A1	LOF	splice-site	-	0	14.0824	35191.9	0.0002	0.0187815
9	73997652	ALDH8A1	NSYN	missense	E->K	17.5875	1533.63	33623.8	0.0223	-0.00561684
9	74034541	ENSBTAT00000026869	NSYN	missense	G->R	14.014	1425.92	33595.1	0.02075	0.0738919
9	74478844	ENSBTAT00000023877	NSYN	missense	F->L	0	70.378	35118.6	0.001	0.10194
9	77241618	NHSL1	NSYN	missense	L->F	0	24.5756	35083.4	0.00035	0.0333389
9	77254188	NHSL1	NSYN	missense	W->R	66.8914	1520.9	33618.2	0.0235	-8.53421
9	81265106	ENSBTAT00000001526	NSYN	missense	N->S	542.157	6002.45	28663.9	0.10064	-10.0544
9	82980358	ENSBTAT00000012740	NSYN	missense	P->R	17.577	1606.54	33529.9	0.02335	0.0999242
9	83000453	ENSBTAT00000012740	NSYN	missense	T->M	31.6962	1764.42	33418.4	0.0259526	-0.567553
9	85170705	ENSBTAT00000063488	NSYN	missense	Y->H	35.191	2107.94	33047.9	0.03095	-0.0666293
9	87771505	TAB2	NSYN	missense	D->Y	281.72	4648.38	30284.9	0.074	-4.66056
9	88020185	LATS1	NSYN	missense	R->C	28.1752	1683.47	33507.4	0.0247	-0.481125
9	88249934	ENSBTAT00000016352	NSYN	missense	A->S	0	6.9622	34804	0.0001	0.00923972
9	89177883	MTHFD1L	NSYN	missense	L->F	28.0976	540.879	34553	0.0085	-10.0417
9	89193131	ENSBTAT00000052076	NSYN	missense	S->P	0	471.947	34487.1	0.00675	1.1291
9	89558914	ENSBTAT00000019669	NSYN	missense	S->N	288.599	4455.69	30450.7	0.0715	-6.88397
9	89558945	ENSBTAT00000019669	NSYN	missense	E->D	288.771	4444.26	30479.4	0.0713071	-7.02325
9	89643509	RMND1	NSYN	missense	S->F	193.572	4128.37	30869.5	0.0641564	-2.19488
9	89643602	RMND1	LOF	nonsense	W->*	0	6.9724	34855	0.0001	0.00924656
9	89643644	RMND1	NSYN	missense	P->L	0	238.088	34774.9	0.0034	0.433838
9	90497701	ENSBTAT00000012328	NSYN	missense	S->F	244.972	4601.97	30149.1	0.07275	-2.51964
9	95193475	ENSBTAT00000061484	NSYN	missense	S->T	21.1296	1648.11	33546.8	0.024	-0.0481185
9	95903001	SNX9	NSYN	missense	E->A	38.7233	2129.78	33038	0.0313469	-0.203327
9	96039215	ENSBTAT00000039096	NSYN	missense	Q->R	59.7227	2557.54	32513.7	0.0381	-0.397964
9	96952224	ENSBTAT00000039897	NSYN	missense	K->M	133.787	1003.4	34069.8	0.01805	-46.107
9	97000393	ENSBTAT00000039897	NSYN	missense	A->V	17.567	1658.32	33458.1	0.0241	0.187924
9	97000398	ENSBTAT00000039897	NSYN	missense	T->P	0	10.4703	34890.5	0.00015	0.0139506
9	97020615	ENSBTAT00000039897	NSYN	missense	S->C	14.0844	1218.3	33978.6	0.0177	-0.273115
9	97693464	IGF2R	NSYN	missense	T->M	0	91.546	35118.5	0.0013	0.136611
9	97840655	ENSBTAT00000012607	NSYN	missense	D->N	6.9942	856.79	34107.2	0.01245	-0.188769
9	97840739	ENSBTAT00000012607	LOF	nonsense	R->*	10.5228	894.438	34171	0.01305	-0.628552
9	99077128	PARK2	NSYN	missense	R->L	0	70.426	35142.6	0.001	0.101979
9	99279570	PARK2	NSYN	missense	R->W	175.74	4024.45	30947.8	0.06225	-1.66486
9	99410867	PARK2	NSYN	missense	A->S	7.0258	3.5129	35114.9	0.000250025	-11.7426
9	101960877	C9H6orf118	NSYN	missense	V->G	21.075	1591.16	33512.8	0.02325	-0.131251
9	103376252	FGFR1OP	NSYN	missense	K->Q	3.5168	165.29	34999.2	0.00245	-1.98837
9	104741956	THBS2	NSYN	missense	R->W	0	232.34	34970.7	0.0033	0.418811
9	105106950	TCTE3	NSYN	missense	D->A	10.4847	335.51	34603	0.0051	-4.21296
10	555591	ENSBTAT00000064562	NSYN	missense	Y->H	400.752	7408.68	27038.6	0.1178	2.24271
10	1119939	ENSBTAT00000025099	NSYN	missense	Q->H	276.674	4577.38	30168	0.07325	-4.74394
10	1716666	EPB41L4A	LOF	splice-site	-	0	14.08	35185.9	0.0002	0.0187799
10	3941836	ENSBTAT00000018634	NSYN	missense	A->V	3.4803	783.067	34016.5	0.01135	0.138338
10	4409723	ENSBTAT00000049503	NSYN	missense	I->F	3.52	637.12	34559.4	0.00915	-0.0867563
10	7016944	POC5	NSYN	missense	T->M	3.5139	502.488	34633	0.00725	-0.355364
10	7029163	POC5	NSYN	missense	R->Q	0	59.857	35150.1	0.00085	0.0853704
10	7031069	POC5	NSYN	missense	D->G	0	14.0736	35169.9	0.0002	0.0187755
10	10079276	ENSBTAT00000048928	NSYN	missense	L->V	117.98	3456.12	31125.9	0.0532	-0.767003
10	10701226	ENSBTAT00000008967	NSYN	missense	A->T	0	232.445	34986.6	0.0033	0.418934
10	11604651	ENSBTAT00000013728	NSYN	missense	L->S	112.582	3310.63	31758.8	0.05025	-1.06114
10	12021804	PDCD7	NSYN	missense	P->L	21.12	1654.4	33524.5	0.0241	-0.0379616
10	12071015	ENSBTAT00000011038	NSYN	missense	R->H	0	207.108	34895.9	0.00295	0.362088
10	12472962	SLC24A1	NSYN	missense	S->C	7.0418	274.63	34927.3	0.0041	-3.03775
10	12473165	SLC24A1	NSYN	missense	V->M	0	336.442	34709.6	0.0048	0.690798
10	12537121	DENND4A	NSYN	missense	H->Y	35.215	1929.78	33250	0.0284	-0.416104
10	14625721	ENSBTAT00000000265	NSYN	missense	V->M	165.355	3891.13	31122	0.060006	-1.69745
10	15154187	ENSBTAT00000011032	NSYN	missense	K->Q	10.485	1065.97	33873.5	0.01555	-0.198212
10	15769935	SPESP1	NSYN	missense	N->S	3.5181	263.858	34917.1	0.00384962	-1.26949
10	15841858	NOX5	NSYN	missense	G->S	0	232.155	34942.8	0.0033	0.418595
10	17524783	UACA	NSYN	missense	K->N	178.883	4433.48	30459.1	0.0683068	-0.39217
10	17663698	LARP6	NSYN	missense	R->Q	10.5597	1235.48	33953	0.01785	0.0511904
10	17721281	THAP10	NSYN	missense	S->F	0	112.701	35106.3	0.0016	0.173215
10	18579794	ENSBTAT00000061141	NSYN	missense	R->Q	3.5178	714.113	34460.4	0.01025	0.0234926
10	18768771	ENSBTAT00000009780	NSYN	missense	G->R	21.1308	1711.59	33485.3	0.0249	0.0387744
10	20572047	KHNYN	NSYN	missense	E->A	0	35.216	35180.8	0.0005	0.0484515
10	20636342	NFATC4	NSYN	missense	I->V	3.5176	837.189	34335.3	0.012	0.217075
10	20683415	ADCY4	NSYN	missense	I->T	84.3048	2869.88	32172.8	0.04325	-0.921182
10	20712164	DHRS1	LOF	nonsense	W->*	0	119.728	35094.3	0.0017	0.185832
10	20815464	REC8	NSYN	missense	R->L	0	313.342	34890.1	0.00445045	0.624076
10	20917847	LRRC16B	NSYN	missense	A->T	73.8801	2237.51	32869.6	0.0339	-3.06519
10	21219730	AP1G2	NSYN	missense	R->W	42.2448	2094.64	33067.1	0.03095	-0.497617
10	21246989	ENSBTAT00000009273	NSYN	missense	L->P	3.5127	572.57	34550.9	0.00825	-0.199426
10	21368465	MYH7	NSYN	missense	E->K	28.128	2088.5	33043.4	0.0305	0.250606
10	21412929	SLC22A17	NSYN	missense	R->Q	42.2616	1993.34	33182.4	0.0295	-0.793884
10	21618371	ENSBTAT00000015372	NSYN	missense	P->L	21.1284	926.128	34270.3	0.0137486	-2.78977
10	21628476	ENSBTAT00000002488	NSYN	missense	P->A	13.868	1684.96	32967.7	0.0247025	0.635274
10	21728894	HAUS4	NSYN	missense	V->M	394.352	5996.26	28819.4	0.09635	-1.99069
10	21770114	RBM23	NSYN	missense	S->L	66.8781	2242.18	32889.9	0.03375	-2.19622
10	21806383	MMP14	NSYN	missense	T->A	352.09	5619.36	29237.6	0.0898	-2.24892
10	21994950	ENSBTAT00000012218	NSYN	missense	R->P	45.7236	2360.04	32766.2	0.03485	-0.126308
10	21994954	ENSBTAT00000012218	NSYN	missense	A->T	0	239.476	34977.5	0.0034	0.435482
10	25737373	ENSBTAT00000020149	NSYN	missense	V->M	0	253.296	34926.7	0.0036	0.469009
10	25757497	RAB2B	NSYN	missense	R->W	3.5211	795.769	34415.2	0.0113989	0.144929
10	26059683	ENSBTAT00000017829	NSYN	missense	A->V	24.6295	1034.44	34125.9	0.0154	-2.89402
10	26152693	SLC39A2	NSYN	missense	R->W	0	154.95	35061	0.0022	0.252344
10	26152696	SLC39A2	NSYN	missense	R->C	0	38.7376	35177.3	0.00055	0.0535727
10	26179458	METTL17	NSYN	missense	H->Y	161.975	3852.19	31197.8	0.0593	-1.68944
10	26729266	KLHL33	NSYN	missense	R->L	0	327.416	34878.6	0.00465	0.663057
10	26773612	ENSBTAT00000001564	NSYN	missense	L->F	218.314	3848.67	31145	0.06085	-6.17697
10	26774981	TEP1	NSYN	missense	E->Q	0	805.943	34388.1	0.01145	2.62295
10	26779474	ENSBTAT00000001564	NSYN	missense	L->P	214.714	3843.73	31140.6	0.0607	-5.8648
10	26851006	TTC5	NSYN	missense	P->S	0	319.073	34740.4	0.00455046	0.641653
10	26998920	ENSBTAT00000055502	NSYN	missense	R->G	267.505	4734.13	30192.8	0.0748575	-3.11697
10	29083318	ENSBTAT00000036191	NSYN	missense	T->K	212.616	3924.67	30717.7	0.0624	-4.80003
10	30138570	ENSBTAT00000035838	NSYN	missense	R->W	0	242.211	34860.8	0.00345	0.442915
10	30526870	ENSBTAT00000061230	NSYN	missense	P->L	0	221.855	34993.1	0.00315	0.39451
10	35567188	GPR176	NSYN	missense	R->C	0	563.296	34642.7	0.008	1.47152
10	35748740	ENSBTAT00000019083	NSYN	missense	G->S	0	56.3312	35150.7	0.0008	0.0799369
10	36008467	PAK6	NSYN	missense	R->C	10.4703	945.817	33944.7	0.01385	-0.467407
10	36028628	PLCB2	NSYN	missense	R->H	56.3504	2416.02	32746.6	0.0359	-0.572706
10	37064040	RPAP1	NSYN	missense	R->W	0	225.37	34988.6	0.0032	0.402574
10	37091888	TYRO3	NSYN	missense	E->K	1	711.181	34495.8	0.0101281	0.603376
10	37336419	ENSBTAT00000032090	NSYN	missense	R->C	861.151	7676.54	26611.3	0.1337	-9.46422
10	37379604	ENSBTAT00000008931	NSYN	missense	R->Q	217.626	4131.39	30752	0.06505	-3.76193
10	37395247	ENSBTAT00000008931	NSYN	missense	L->M	17.4885	1210.2	33749.3	0.0178	-0.678147
10	37650892	PLA2G4F	NSYN	missense	T->M	14.0872	1412.24	33791.7	0.02045	0.043224
10	37896511	ENSBTAT00000005329	NSYN	missense	H->R	0	17.605	35192.4	0.00025	0.0236016
10	38106616	ENSBTAT00000057049	NSYN	missense	K->E	52.74	2510.42	32600.4	0.0371963	-0.165972
10	38151591	ENSBTAT00000007561	NSYN	missense	I->M	52.644	2537.44	32505.9	0.03765	-0.111476
10	38174320	ENSBTAT00000008483	NSYN	missense	R->H	0	196.857	34956.1	0.0028	0.339298
10	38198521	TTBK2	NSYN	missense	L->V	0	70.272	35065.7	0.001	0.101856
10	38335826	UBR1	NSYN	missense	I->T	21.1272	1852.15	33338.7	0.0269	0.276076
10	42861356	NEMF	NSYN	missense	S->T	0	95.0886	35122.9	0.00135	0.14259
10	43525731	ATL1	NSYN	missense	A->V	3.5216	552.891	34659.6	0.00795	-0.242886
10	43596911	SAV1	NSYN	missense	R->C	62.3844	2672.13	31923.5	0.04035	-0.235734
10	44952561	ENSBTAT00000029257	NSYN	missense	A->V	193.688	4472.43	30549.9	0.069	-0.783831
10	45576223	ENSBTAT00000054726	NSYN	missense	D->N	0	359.132	34849.9	0.0051	0.754638
10	46342267	ENSBTAT00000061038	NSYN	missense	R->C	0	123.249	35090.8	0.00175	0.19223
10	47305910	ENSBTAT00000061376	NSYN	missense	R->H	24.6498	1640.97	33548.4	0.024	-0.294793
10	47956452	ENSBTAT00000027736	NSYN	missense	A->T	13.8608	1413.8	33224.3	0.0208	0.0787151
10	49776256	NARG2	NSYN	missense	Q->H	10.5504	344.646	34816.3	0.00519948	-4.15057
10	50687268	GTF2A2	NSYN	missense	E->D	0	264.097	34948.9	0.00375	0.495323
10	51200065	ENSBTAT00000061089	NSYN	missense	K->R	17.5925	1717.03	33450.4	0.0249	0.294132
10	54013605	MNS1	NSYN	missense	Y->C	3.5199	330.871	34864.6	0.0048	-0.932134
10	56122340	UNC13C	NSYN	missense	P->A	10.5627	1112.6	34082.3	0.0161016	-0.128929
10	56388695	UNC13C	NSYN	missense	R->G	0	186.618	35024.4	0.00265	0.317035
10	56696067	ENSBTAT00000061231	NSYN	missense	C->Y	52.824	2035.48	33127.7	0.0304	-1.67399
10	58321604	GNB5	NSYN	missense	V->I	14.084	1313.33	33882.6	0.01905	-0.0972713
10	58742410	LYSMD2	NSYN	missense	I->M	0	250.012	34963	0.00355	0.460745
10	59915219	TRPM7	NSYN	missense	N->Y	0	10.5597	35188.4	0.00015	0.014011
10	60559146	ENSBTAT00000034569	NSYN	missense	L->F	0	359.203	34856.8	0.0051	0.754744
10	61686180	ENSBTAT00000015487	NSYN	missense	D->G	14.0832	1482.26	33711.7	0.02145	0.152653
10	62137535	FBN1	NSYN	missense	C->W	0	3.5101	35097.5	5e-05	0.00461489
10	65066843	SQRDL	NSYN	missense	R->C	0	253.282	34924.7	0.0036	0.468991
10	65263501	SPATA5L1	NSYN	missense	K->T	45.4636	1975.92	32947.1	0.029553	-1.12441
10	65492635	DUOX1	NSYN	missense	R->S	0	109.157	35102.8	0.00155	0.166962
10	65557716	ENSBTAT00000021603	NSYN	missense	K->E	3.5207	447.129	34756.4	0.00645	-0.508991
10	65656118	ENSBTAT00000052094	LOF	splice-site	-	0	3.4584	34580.5	5e-05	0.0045806
10	65657046	ENSBTAT00000052094	NSYN	missense	I->T	59.8128	2360.85	32763.3	0.03525	-0.986947
10	65919770	ENSBTAT00000026549	NSYN	missense	H->R	10.5627	1109.08	34089.4	0.01605	-0.13507
10	67159331	CDKN3	LOF	nonsense	Q->*	0	176.065	35036.9	0.0025	0.294955
10	67215579	GMFB	NSYN	missense	T->I	183.123	3866.72	31169.7	0.060094	-3.0068
10	67763378	MAPK1IP1L	NSYN	missense	P->L	0	105.642	35104.8	0.00150015	0.160798
10	70812777	PSMA3	NSYN	missense	S->T	17.517	1320.78	33695.7	0.01935	-0.382939
10	70817164	PSMA3	NSYN	missense	R->C	28.1752	1845.48	33345.3	0.027	-0.136012
10	70887782	ARID4A	NSYN	missense	D->Y	7.0412	531.611	34667.3	0.00775	-1.22353
10	70887906	ENSBTAT00000025155	NSYN	missense	L->P	14.0104	1278.45	33737	0.0186481	-0.144194
10	71870054	DAAM1	NSYN	missense	A->T	28.1752	1750.38	33440.4	0.02565	-0.321386
10	72879023	ENSBTAT00000019517	NSYN	missense	S->Y	3.521	633.78	34572.7	0.0091	-0.0924418
10	74116692	HIF1A	NSYN	missense	E->Q	0	154.964	35064	0.0022	0.252357
10	74466071	ENSBTAT00000025211	NSYN	missense	R->Q	306.318	4894.05	30012.2	0.0781922	-4.4525
10	74478338	ENSBTAT00000025211	NSYN	missense	S->R	38.5847	1999.39	33039	0.0296	-0.474428
10	74482175	ENSBTAT00000025211	NSYN	missense	H->Q	52.605	2251.49	32765.9	0.0336	-0.785665
10	76526269	ENSBTAT00000029285	NSYN	missense	Y->C	59.8638	2503.72	32650.4	0.03725	-0.549508
10	76556298	SYNE2	NSYN	missense	I->T	7.0414	1006.92	34193	0.0145	0.0340224
10	76604416	SYNE2	NSYN	missense	D->N	3.5212	781.706	34426.8	0.0112	0.122278
10	76927980	AKAP5	NSYN	missense	D->N	206.352	3980.15	30788.5	0.0628	-3.91532
10	76928719	AKAP5	NSYN	missense	M->T	0	105.639	35107.4	0.0015	0.160786
10	77243423	ENSBTAT00000006213	NSYN	missense	R->W	10.5636	1306.37	33898.6	0.0188481	0.161715
10	77370335	CHURC1	NSYN	missense	L->F	112.694	3609.74	31494.6	0.05445	-0.243432
10	80290262	RAD51B	NSYN	missense	S->R	3.5214	197.198	35013.3	0.0029	-1.71913
10	85105737	ENSBTAT00000015505	NSYN	missense	G->A	24.4209	1412.92	33449.7	0.02095	-0.885924
10	85114939	ENSBTAT00000015505	NSYN	missense	G->R	31.6719	1896.79	33262.5	0.02785	-0.249173
10	85115359	ENSBTAT00000015505	NSYN	missense	E->K	17.5625	1457.69	33649.8	0.02125	-0.115495
10	85127028	NUMB	NSYN	missense	T->M	7.0434	369.779	34840.2	0.00545	-2.19417
10	85512916	ENSBTAT00000012212	NSYN	missense	G->A	14.0864	1126.91	34071.5	0.0164016	-0.490563
10	85520528	ENSBTAT00000012216	NSYN	missense	P->S	49.2702	2058.79	33084.9	0.03065	-1.19934
10	85715601	FAM161B	NSYN	missense	R->C	14.0868	1074.12	34128.8	0.01565	-0.640742
10	85721754	FAM161B	NSYN	missense	S->F	0	288.107	34846.9	0.0041	0.55736
10	86039743	ABCD4	NSYN	missense	P->L	1482.15	9538.98	23527.9	0.18095	-12.1202
10	86350279	AREL1	NSYN	missense	R->C	0	417.666	34680.3	0.00595	0.939586
10	87161225	FLVCR2	NSYN	missense	A->V	17.6065	1651.49	33543.9	0.02395	0.169672
10	87673479	ENSBTAT00000007218	NSYN	missense	T->M	91.559	3493.33	31630.1	0.0522	0.125645
10	87903787	ENSBTAT00000015901	NSYN	missense	L->F	0	309.065	34808.4	0.00440044	0.613445
10	89026561	VASH1	NSYN	missense	R->T	0	253.483	34952.5	0.0036	0.469237
10	89405035	ZDHHC22	NSYN	missense	P->L	84.5184	2993.36	32138.1	0.0449	-0.568292
10	89536150	NGB	NSYN	missense	R->H	0	3.5164	35160.5	5e-05	0.00461906
10	89673388	ENSBTAT00000035556	NSYN	missense	P->R	0	239.476	34977.5	0.0034	0.435482
10	89735909	ENSBTAT00000055095	NSYN	missense	L->P	7.043	348.629	34859.3	0.00515	-2.35889
10	90126392	ADCK1	LOF	nonsense	E->*	95.0508	3252.85	31856.1	0.0489	-0.38589
10	92624553	DIO2	NSYN	missense	V->M	10.5639	1010.61	34191.8	0.01465	-0.331675
10	92890722	ENSBTAT00000054915	NSYN	missense	R->G	0	234.835	34815.2	0.00335	0.425854
10	93205113	ENSBTAT00000061224	NSYN	missense	E->K	17.5985	615.948	34563.5	0.00925	-4.3092
10	100753865	GALC	NSYN	missense	V->I	52.8255	489.516	34678.2	0.00844916	-25.1354
10	100789731	GALC	NSYN	missense	R->L	3.5139	520.057	34615.4	0.0075	-0.313004
10	102940218	NRDE2	NSYN	missense	V->G	0	6.971	34848	0.0001	0.00924562
10	103510380	ENSBTAT00000014487	NSYN	missense	G->S	17.6035	1295.62	33893.8	0.0189	-0.462579
10	103970339	CTDSPL2	NSYN	missense	D->N	3.5182	457.366	34721.1	0.0066	-0.477865
11	65600	ENSBTAT00000027514	NSYN	missense	S->C	7.0428	897.957	34309	0.01295	-0.126026
11	333162	MERTK	NSYN	missense	A->T	161.929	3516.68	31523.4	0.05455	-3.59938
11	1482213	ENSBTAT00000033248	NSYN	missense	A->S	1096.35	8308.4	25622.3	0.1499	-13.0254
11	1605181	TPC3	NSYN	missense	R->Q	0	24.6456	35183.4	0.00035	0.0333881
11	1747993	MALL	NSYN	missense	G->R	0	7.042	35203	0.0001	0.00929308
11	1936191	ENSBTAT00000012654	NSYN	missense	G->R	10.5639	964.836	34237.6	0.014	-0.44261
11	2537195	ARID5A	NSYN	missense	P->L	3.5189	837.498	34344.5	0.0120012	0.217198
11	2781570	ANKRD39	LOF	splice-site	-	0	186.576	35016.4	0.00265	0.31699
11	3082239	ENSBTAT00000008872	NSYN	missense	R->Q	0	161.961	35047	0.0023	0.266291
11	3475733	ENSBTAT00000025796	NSYN	missense	K->M	0	330.579	34837.4	0.0047	0.672469
11	3577215	CNGA3	NSYN	missense	R->H	13.9544	819.821	34052.2	0.01215	-1.62276
11	4295093	MITD1	NSYN	missense	C->Y	0	193.694	35023.3	0.00275	0.332089
11	4417169	TXNDC9	NSYN	missense	V->A	0	218.097	34958.9	0.0031	0.386231
11	5553205	PDCL3	NSYN	missense	E->D	77.4466	2534.62	32590.9	0.0382	-1.77731
11	5560429	PDCL3	NSYN	missense	E->G	1854.62	10986.9	22350.4	0.2088	-8.00401
11	5918889	NPAS2	NSYN	missense	P->S	31.5783	1561.37	33494.1	0.02315	-1.23778
11	7134915	IL1RL1	NSYN	missense	D->G	985.712	9318.5	24899.8	0.16035	-1.23201
11	7430262	ENSBTAT00000002247	NSYN	missense	T->M	98.3444	3080.29	31940.9	0.0466547	-1.04764
11	7431503	ENSBTAT00000002247	NSYN	missense	S->N	2146.1	11472.9	21563	0.22405	-9.68472
11	10002258	ENSBTAT00000009183	NSYN	missense	K->T	3.5182	235.719	34946.3	0.00344966	-1.44169
11	10073577	LOXL3	NSYN	missense	S->R	687.294	7207.86	26992.8	0.123	-5.64282
11	10140273	ENSBTAT00000022083	NSYN	missense	R->W	3.5198	813.074	34381.4	0.01165	0.174305
11	10179218	RTKN	NSYN	missense	V->M	3.5176	474.876	34697.6	0.00685	-0.42865
11	10194230	C11H2orf81	NSYN	missense	R->Q	52.809	2496.11	32657.1	0.03695	-0.198031
11	10247298	DCTN1	NSYN	missense	A->S	3.5088	596.496	34484.5	0.00860086	-0.152608
11	10878960	ENSBTAT00000047267	NSYN	missense	S->L	412.051	6286.41	28516	0.10096	-1.2875
11	13059845	DYSF	NSYN	missense	P->L	3.5212	352.12	34856.4	0.0051	-0.842214
11	13162472	ZNF638	NSYN	missense	P->L	6175.33	16503.9	12484.3	0.410291	-1.98631
11	13234602	ENSBTAT00000012184	NSYN	missense	N->K	3.5217	493.038	34720.4	0.0071	-0.382502
11	13410686	NAGK	NSYN	missense	D->N	28.1224	727.667	34397.2	0.01115	-7.05346
11	13410688	NAGK	NSYN	missense	P->R	59.7941	2377.69	32735.5	0.0355	-0.925313
11	14191227	XDH	NSYN	missense	W->C	3.5158	706.676	34444.3	0.010151	0.0140161
11	14201213	XDH	NSYN	missense	I->T	3.5175	390.442	34784.6	0.00564944	-0.692959
11	15087218	BIRC6	NSYN	missense	R->C	0	17.609	35200.4	0.00025	0.0236043
11	18952192	ENSBTAT00000011877	NSYN	missense	V->I	38.7387	2225.71	32952.5	0.0327	-0.0451611
11	19465433	ENSBTAT00000019031	NSYN	missense	I->T	7.0106	858.798	34187.2	0.01245	-0.189027
11	19679809	CEBPZ	NSYN	missense	R->G	105.621	2784.87	32316.5	0.04255	-3.15409
11	20393917	RMDN2	NSYN	missense	S->L	17.6005	1327.08	33856.3	0.01935	-0.384105
11	25633372	ENSBTAT00000004627	NSYN	missense	L->V	14.0816	858.978	34330.9	0.0126	-1.47515
11	25783102	ENSBTAT00000004627	NSYN	missense	L->V	42.2616	2454.69	32724.6	0.0360464	0.148459
11	25784426	ENSBTAT00000004627	NSYN	missense	S->C	7.0428	813.443	34393.5	0.01175	-0.290381
11	26194458	ENSBTAT00000021773	NSYN	missense	E->D	154.902	3978.16	31071.9	0.0609	-0.845078
11	28896872	PIGF	NSYN	missense	W->G	45.656	1984.28	33093.6	0.029547	-1.12877
11	28900559	PIGF	NSYN	missense	F->I	0	126.76	35084.2	0.0018	0.198675
11	29204754	MCFD2	NSYN	missense	G->R	0	3.496	34956.5	5e-05	0.00460557
11	30013271	ENSBTAT00000001868	NSYN	missense	R->C	14.0284	1350.23	33706.7	0.01965	-0.0334294
11	30839424	LHCGR	NSYN	missense	R->W	0	573.89	34634.1	0.00815	1.51481
11	36480454	PSME4	NSYN	missense	D->N	0	59.8689	35157.1	0.00085	0.0853796
11	36683472	ACYP2	NSYN	missense	V->M	0	252.605	34827.9	0.00360036	0.468197
11	37905963	CCDC88A	NSYN	missense	R->C	0	17.599	35180.4	0.00025	0.0235975
11	38095050	ENSBTAT00000000705	NSYN	missense	L->I	171.956	4053.24	30867.8	0.06265	-1.32974
11	44707394	ENSBTAT00000021337	NSYN	missense	G->R	0	168.854	35009.1	0.0024	0.280346
11	44724501	SULT1C4	NSYN	missense	V->M	31.6773	1766.89	33398.4	0.026	-0.557871
11	46131992	POLR1B	NSYN	missense	M->I	66.9142	2511.04	32640	0.03755	-0.999986
11	46132713	POLR1B	NSYN	missense	T->M	0	154.946	35060.1	0.0022	0.252339
11	46228842	SLC20A1	NSYN	missense	L->F	0	147.895	35065.1	0.0021	0.23858
11	47361270	EIF2AK3	NSYN	missense	R->H	792.247	7968.25	26450.5	0.13565	-4.03793
11	47805018	SMYD1	NSYN	missense	R->W	24.5798	1390.51	33702.4	0.020498	-1.00409
11	47878222	KRCC1	NSYN	missense	K->E	73.6302	2457.85	32530.5	0.03715	-1.76454
11	48601455	PTCD3	NSYN	missense	S->L	157.968	4121.21	30824.8	0.0632	-0.526036
11	48692223	POLR1A	NSYN	missense	G->S	0	133.787	35073.2	0.0019	0.211735
11	48711751	POLR1A	NSYN	missense	R->C	3.5212	165.496	35046.5	0.00244976	-1.99046
11	49062836	GNLY	NSYN	missense	A->T	3.4851	651.714	34195.8	0.00945	-0.0538172
11	49284644	GGCX	NSYN	missense	G->D	0	133.593	35022.4	0.0019	0.211554
11	49442295	ELMOD3	NSYN	missense	P->R	14.0856	1214.88	33985	0.01765	-0.280575
11	60936869	TMEM17	NSYN	missense	N->H	7.0398	939.813	34252.1	0.01355	-0.0583603
11	61426175	ENSBTAT00000061137	NSYN	missense	R->W	473.499	5864.37	28736.1	0.0971	-6.79378
11	63590480	ACTR2	LOF	nonsense	R->*	0	500.11	34715.4	0.00710071	1.22547
11	66873911	ENSBTAT00000044615	NSYN	missense	D->A	10.545	1029.89	34109.6	0.01495	-0.284564
11	70645970	ENSBTAT00000009703	NSYN	missense	T->P	0	3.5143	35139.5	5e-05	0.00461767
11	72387540	CAD	NSYN	missense	R->C	253.246	5068.43	29851.3	0.07925	-0.880982
11	72523990	CGREF1	NSYN	missense	N->K	0	440.163	34769.3	0.00625063	1.01246
11	73091800	CCDC164	NSYN	missense	R->H	0	225.389	34991.6	0.0032	0.402596
11	73122427	CCDC164	NSYN	missense	R->W	209.772	4307.32	30444.9	0.0676	-2.12576
11	73304447	ENSBTAT00000064510	LOF	nonsense	S->*	3.518	137.202	35039.3	0.00205	-2.2772
11	78024485	ENSBTAT00000038995	NSYN	missense	R->W	7.043	788.816	34419.1	0.0114	-0.346461
11	78031721	ENSBTAT00000038995	NSYN	missense	L->P	116.206	2369.9	32731.4	0.0369463	-8.37073
11	78322043	ENSBTAT00000020581	NSYN	missense	A->T	10.5651	1264.29	33942.1	0.01825	0.0932484
11	80985170	GEN1	NSYN	missense	K->N	3.5217	401.474	34812	0.0058	-0.656196
11	83079235	NBAS	NSYN	missense	I->T	7.0428	1014.16	34192.8	0.0146	0.0439344
11	87528203	KLF11	NSYN	missense	R->H	14.0824	1239.25	33952.7	0.018	-0.229882
11	87532364	KLF11	NSYN	missense	I->T	10.5618	366.142	34829.3	0.0055	-3.90782
11	87946781	IAH1	NSYN	missense	A->T	0	95.0697	35115.9	0.00135	0.142574
11	88432869	ENSBTAT00000065461	LOF	nonsense	W->*	137.288	4136.23	30928.5	0.06265	0.0188098
11	92654919	DAB2IP	NSYN	missense	R->W	14.0664	1178.06	33970.4	0.0171517	-0.358522
11	93985499	ENSBTAT00000043370	NSYN	missense	D->N	17.599	1513.51	33663.4	0.0220022	-0.0344363
11	98189737	ENSBTAT00000032812	NSYN	missense	A->S	7.041	735.784	34462.2	0.01065	-0.48045
11	98205024	LRSAM1	NSYN	missense	L->V	227.951	4641.91	29668.1	0.0738	-1.3349
11	98408709	ENSBTAT00000016930	NSYN	missense	L->W	108.342	3065.03	31775.6	0.04695	-1.75904
11	98424918	TTC16	NSYN	missense	A->T	3.5216	524.718	34687.8	0.00755	-0.305231
11	98506168	FPGS	NSYN	missense	R->C	1055.91	7581.43	26559.7	0.1377	-22.4034
11	98624428	FAM102A	NSYN	missense	S->L	3.5197	520.916	34672.6	0.0075	-0.313325
11	98882218	GOLGA2	NSYN	missense	E->K	168.994	3693.21	31344.8	0.05725	-3.02033
11	99241214	PKN3	NSYN	missense	I->T	10.5384	1362.97	33754.5	0.0197	0.270143
11	99487310	NUP188	NSYN	missense	F->C	299.192	4593.47	30306.3	0.07375	-6.46692
11	99494079	NUP188	NSYN	missense	P->L	3.5217	1391.07	33822.4	0.01985	1.72758
11	100049512	NTMT1	NSYN	missense	R->W	0	252.878	34869.1	0.0036	0.4685
11	100248350	ENSBTAT00000063118	NSYN	missense	R->W	24.647	1644.31	33537.5	0.0240524	-0.287101
11	100344759	FNBP1	NSYN	missense	R->H	45.7782	2528.37	32636.3	0.0372037	0.118042
11	100448846	GPR107	NSYN	missense	S->Y	0	337.68	34837.3	0.0048	0.692571
11	100802781	ASS1	LOF	nonsense	R->*	0	28.172	35186.8	0.0004	0.0383608
11	101149723	ABL1	NSYN	missense	D->N	3.5184	295.546	34881.4	0.00430043	-1.09849
11	101366845	ENSBTAT00000029190	NSYN	missense	G->V	45.0268	1489.35	33101.6	0.0228	-3.79812
11	101477299	FAM78A	LOF	nonsense	S->*	3.5206	679.476	34523	0.00975	-0.023704
11	101652341	POMT1	NSYN	missense	L->F	0	154.959	35063	0.0022	0.252352
11	102418506	ENSBTAT00000042924	NSYN	missense	S->F	0	186.645	35029.4	0.00265	0.317063
11	102419884	ENSBTAT00000042924	NSYN	missense	A->T	14.0872	1369.98	33833.9	0.01985	-0.0140355
11	102486233	ENSBTAT00000024905	NSYN	missense	I->V	0	52.803	35149.2	0.00075	0.0745537
11	102498942	TTF1	LOF	nonsense	R->*	0	1229.11	33988.9	0.01745	5.44016
11	102863737	AK8	NSYN	missense	H->Y	232.346	4129.43	30838.7	0.0652565	-4.99285
11	102949209	AK8	NSYN	missense	R->C	7.0238	920.118	34191.9	0.0133	-0.0853506
11	102956450	C11H9orf9	NSYN	missense	V->M	0	137.335	35076.7	0.00195	0.218381
11	103047331	GFI1B	NSYN	missense	T->S	3.5214	457.782	34749.2	0.00660066	-0.478086
11	103107385	ENSBTAT00000032655	NSYN	missense	A->E	129.992	3439.52	31560	0.0526553	-1.58231
11	103130436	ENSBTAT00000032653	NSYN	missense	T->A	133.429	3518.32	31457.7	0.0539054	-1.44886
11	103802462	ENSBTAT00000031357	NSYN	missense	G->D	59.5425	2325.66	32639.8	0.0349	-1.07268
11	103886449	ENSBTAT00000042731	LOF	splice-site	-	56.2352	2305.64	32781.6	0.0344034	-0.894035
11	103929231	INPP5E	NSYN	missense	D->N	0	73.9494	35140.1	0.00105	0.10762
11	103929969	ENSBTAT00000001784	NSYN	missense	S->C	0	603.393	34477.6	0.0086	1.64349
11	103962900	ENSBTAT00000042743	NSYN	missense	E->K	312.586	5303.42	29502.5	0.0844084	-2.15043
11	104011104	ENSBTAT00000017746	NSYN	missense	A->D	31.5963	1944.93	33130.5	0.0286	-0.149768
11	104232408	ABO	NSYN	missense	S->R	0	73.8969	35115.1	0.00105	0.107578
11	104319528	ENSBTAT00000000051	NSYN	missense	P->S	0	540.051	34298.5	0.00775078	1.38976
11	105595195	MRPL41	NSYN	missense	F->C	66.8667	2565.57	32560.6	0.03835	-0.809071
11	105671267	ENSBTAT00000016089	NSYN	missense	R->H	0	408.285	34788.7	0.0058	0.907145
11	106160797	ENSBTAT00000065653	NSYN	missense	R->H	389.788	5523.75	29202.5	0.08975	-4.7063
11	106202603	FUT7	NSYN	missense	N->K	0	108.59	34920.4	0.00155	0.166461
11	106216959	ENSBTAT00000063417	NSYN	missense	P->L	389.366	4802.18	29882.9	0.079558	-12.2107
11	106451481	C11H9orf116	NSYN	missense	P->H	111.67	3587.41	31197.9	0.0546	-0.221622
11	106939570	ENSBTAT00000063052	NSYN	missense	S->L	21.1122	1646.75	33522.7	0.0239976	-0.0482207
11	107247302	PSMD13	NSYN	missense	E->D	0	176.075	35038.9	0.0025	0.294965
12	401161	PCDH20	NSYN	missense	P->S	0	105.639	35107.4	0.0015	0.160786
12	1534669	TDRD3	NSYN	missense	R->C	17.606	1102.14	34092.3	0.01615	-1.08932
12	2479198	DIAPH3	NSYN	missense	L->M	45.6378	2253.81	32806.6	0.0334	-0.322619
12	2516219	DIAPH3	NSYN	missense	R->C	77.418	3040.42	32072.2	0.0454	-0.162446
12	5163670	ENSBTAT00000013751	NSYN	missense	Q->H	24.6372	1826.67	33344.7	0.02665	0.0180434
12	11463981	MTRF1	NSYN	missense	R->W	52.827	2828.01	32337.2	0.04165	0.353146
12	11733000	ENSBTAT00000001508	NSYN	missense	D->V	0	288.747	34924.3	0.0041	0.558196
12	12477872	ENSBTAT00000019629	NSYN	missense	S->T	0	197.221	35020.8	0.0028	0.339693
12	12478433	ENSBTAT00000019629	NSYN	missense	H->Y	3.5219	626.898	34588.6	0.009	-0.104003
12	12480845	ENSBTAT00000019629	NSYN	missense	S->C	3.5218	651.533	34562.9	0.00935	-0.0647469
12	13455088	ENSBTAT00000016503	NSYN	missense	L->F	3.5173	830.083	34339.4	0.0119	0.204615
12	14119196	CCDC122	NSYN	missense	T->I	48.9258	2610.54	32287.5	0.03875	0.139191
12	18955313	ENSBTAT00000013838	NSYN	missense	T->M	7.041	1151.2	34046.8	0.01655	0.272881
12	19046742	ENSBTAT00000037908	NSYN	missense	E->K	190.118	3767.15	31249.7	0.0589	-4.24655
12	19180614	PHF11	NSYN	missense	A->V	3.5214	1000.08	34210.4	0.0143	0.55079
12	21418743	ENSBTAT00000013674	NSYN	missense	Q->K	3.5156	562.496	34590	0.0081	-0.220711
12	21494079	ENSBTAT00000013659	NSYN	missense	D->H	0	190.166	35022.3	0.00270027	0.324564
12	21844856	TSPYL5	NSYN	missense	V->A	24.5952	1935.99	33175.4	0.02825	0.195041
12	24705761	ENSBTAT00000015749	NSYN	missense	A->G	31.6809	2435.91	32733.4	0.0355	0.80826
12	26003620	ENSBTAT00000061623	NSYN	missense	L->F	14.0572	2136.69	32992.2	0.0308	2.12438
12	28671545	ENSBTAT00000001311	NSYN	missense	F->V	73.2354	2134.29	32670	0.0326967	-3.62398
12	28691271	ZAR1L	NSYN	missense	T->I	14.0864	1222	33983.4	0.0177482	-0.265894
12	31295580	ENSBTAT00000063280	NSYN	missense	A->T	0	133.745	35062.3	0.0019	0.211696
12	32842933	ENSBTAT00000006899	LOF	nonsense	R->*	28.1584	1928.85	33241	0.0282	-0.00782414
12	34913182	ENSBTAT00000002433	NSYN	missense	R->W	0	147.89	35064.1	0.0021	0.238576
12	34916498	ENSBTAT00000002433	NSYN	missense	A->V	0	137.35	35080.6	0.00195	0.218396
12	36627132	ENSBTAT00000061268	NSYN	missense	K->N	476.348	6323.7	27718	0.1054	-2.93798
12	36904786	ENSBTAT00000019264	NSYN	missense	A->T	140.868	3289.27	31786.9	0.0507	-3.27049
12	44566756	ENSBTAT00000011402	NSYN	missense	H->N	7.0342	893.343	34270.6	0.0129	-0.131984
12	47803896	BORA	NSYN	missense	P->L	7.0436	778.318	34436.2	0.0112489	-0.371835
12	54815732	ENSBTAT00000023371	NSYN	missense	P->L	38.7002	2054.63	33088.7	0.0303	-0.356615
12	59145549	ENSBTAT00000054494	NSYN	missense	R->Q	98.2828	3102.93	31899.8	0.047	-0.960824
12	72157786	ENSBTAT00000035486	NSYN	missense	S->C	796.657	7927.96	26366.9	0.135664	-4.36071
12	75797736	ENSBTAT00000035484	LOF	nonsense	R->*	0	3.4947	34943.5	5e-05	0.00460471
12	77007467	DNAJC3	NSYN	missense	A->V	0	228.865	34981.1	0.00325	0.410674
12	77079551	ENSBTAT00000005775	NSYN	missense	S->Y	70.41	2753.03	32378	0.0411041	-0.482031
12	79022175	IPO5	NSYN	missense	S->N	0	3.4942	34938.5	5e-05	0.00460438
12	79426323	FARP1	NSYN	missense	K->R	3.5216	144.386	35071.6	0.00214979	-2.20198
12	79724075	DOCK9	NSYN	missense	R->W	14.0876	1222.1	33982.8	0.01775	-0.265777
12	80237652	GPR183	NSYN	missense	V->M	301.138	6418.43	28296.4	0.10025	1.31367
12	80892768	PCCA	NSYN	missense	P->S	7.0422	679.572	34520.9	0.00985099	-0.646552
12	81157830	GGACT	NSYN	missense	G->S	133.752	3125.58	31942.2	0.0481952	-3.70935
12	81550234	ENSBTAT00000061374	NSYN	missense	T->M	946.772	8031.73	26221	0.140986	-9.62611
12	82962526	ENSBTAT00000023278	NSYN	missense	R->C	14.0844	982.387	34214.5	0.01435	-0.948792
12	83055243	STK24	NSYN	missense	L->V	184.318	4322.78	30266.4	0.0674567	-0.817711
12	83066552	ERCC5	NSYN	missense	M->T	0	408.39	34797.6	0.0058	0.907314
12	87918921	ENSBTAT00000024275	NSYN	missense	A->V	0	422.016	34746	0.006	0.952535
12	90219678	TUBGCP3	NSYN	missense	R->C	63.3006	2423.01	32680.7	0.03625	-1.03474
12	90535165	ENSBTAT00000025894	NSYN	missense	E->K	253.454	5417.59	29531	0.08415	-0.0698974
12	90664634	ADPRHL1	NSYN	missense	A->T	395.206	5560.87	29017.9	0.0908	-4.63097
13	12301784	DHTKD1	NSYN	missense	A->T	126.54	3585.3	31438.2	0.0546	-0.838234
13	16227871	ITIH2	NSYN	missense	T->M	63.3906	1218.51	33938.6	0.0190981	-11.9637
13	17571567	IL2RA	NSYN	missense	S->P	0	3.454	34536.5	5e-05	0.00457767
13	17763862	ENSBTAT00000050251	NSYN	missense	R->W	0	10.5174	35047.5	0.00015	0.0139824
13	17765476	ENSBTAT00000050251	NSYN	missense	R->C	898.498	8362.67	25703.3	0.145285	-4.35416
13	17767546	ENSBTAT00000050712	NSYN	missense	T->M	17.593	1365.22	33806.7	0.019898	-0.296415
13	20279259	ITGB1	NSYN	missense	G->W	0	98.5516	35098.4	0.0014	0.148555
13	23359228	ENSBTAT00000047358	NSYN	missense	D->N	10.5564	1263.25	33917.7	0.0182482	0.0931072
13	25609465	ENSBTAT00000061384	NSYN	missense	R->Q	0	214.714	34984.3	0.00305	0.378436
13	28648802	FRMD4A	NSYN	missense	R->Q	3.5042	742.89	34292.1	0.0107011	0.0682945
13	29856032	DCLRE1C	NSYN	missense	R->W	0	10.5639	35202.4	0.00015	0.0140138
13	31708676	CUBN	NSYN	missense	G->D	0	151.429	35064.6	0.00215	0.245439
13	31950556	VIM	NSYN	missense	L->M	3.4907	76.7954	34826.7	0.0012	-3.12519
13	32429009	STAM	NSYN	missense	P->L	0	56.3392	35155.7	0.0008	0.0799431
13	33733629	ARHGAP12	NSYN	missense	S->F	647.79	7051.76	27506.4	0.11855	-5.53595
13	34861805	SVIL	NSYN	missense	V->G	0	3.4854	34850.5	5e-05	0.00459854
13	34903580	SVIL	NSYN	missense	R->H	0	436.629	34775.4	0.0062	1.00044
13	34946708	ENSBTAT00000052009	NSYN	missense	R->C	45.7821	2120.06	33047.6	0.0314031	-0.686339
13	35338624	ENSBTAT00000001595	NSYN	missense	E->K	77.4642	2626.74	32510.3	0.0394961	-1.36792
13	35339562	KIAA1462	LOF	nonsense	R->*	3.5213	475.375	34734.1	0.00685	-0.428942
13	35341196	KIAA1462	NSYN	missense	R->Q	3.5212	827.482	34381	0.01185	0.198583
13	36924507	ARMC4	NSYN	missense	R->H	1250.91	10460.6	23426.5	0.18445	-0.598573
13	37060463	ARMC4	NSYN	missense	A->V	3.5217	855.773	34357.7	0.01225	0.249116
13	38047537	PCSK2	NSYN	missense	A->T	14.0868	1630.55	33572.4	0.02355	0.445004
13	38192413	BFSP1	NSYN	missense	R->C	3.5212	630.295	34578.2	0.00905	-0.0981841
13	38296447	ENSBTAT00000061585	LOF	splice-site	-	112.506	3368.14	31677.4	0.0511	-0.855011
13	38379830	BANF2	NSYN	missense	G->R	158.463	4908.83	30146.7	0.0742	1.20397
13	38772202	ENSBTAT00000064615	NSYN	missense	V->M	0	239.476	34977.5	0.0034	0.435482
13	38772838	ENSBTAT00000064615	NSYN	missense	R->W	232.346	3745.71	31229.5	0.059794	-8.72755
13	38772844	ENSBTAT00000064615	NSYN	missense	C->R	161.75	4437.57	30563.7	0.0677	-0.011509
13	38772927	ENSBTAT00000064615	NSYN	missense	H->Q	132.453	4130.44	30593.1	0.06305	0.148136
13	40068856	ENSBTAT00000039379	NSYN	missense	Y->C	80.9899	2873.38	32258.6	0.0431	-0.723866
13	40350171	ENSBTAT00000018848	NSYN	missense	D->N	3.5211	686.615	34520.9	0.00985	-0.01405
13	40368801	ENSBTAT00000018848	NSYN	missense	R->W	3.5107	337.027	34766.5	0.0049	-0.89961
13	42408252	ENSBTAT00000046451	NSYN	missense	R->W	3.5197	918.642	34274.8	0.01315	0.372597
13	43339929	ENSBTAT00000046340	NSYN	missense	E->K	3.5139	720.35	34418.7	0.010349	0.0331084
13	43340513	ENSBTAT00000046340	NSYN	missense	R->H	0	302.875	34915.1	0.0043	0.595542
13	43341341	ENSBTAT00000046340	NSYN	missense	L->P	21.0936	1666.39	33468.5	0.0243	-0.0183097
13	44205037	ENSBTAT00000022850	NSYN	missense	E->K	0	56.3472	35160.7	0.0008	0.0799492
13	48447094	ENSBTAT00000015645	NSYN	missense	E->K	112.643	3189.21	31899.1	0.0485	-1.5559
13	48581333	ENSBTAT00000000073	NSYN	missense	G->S	17.6085	1000.16	34199.2	0.0147	-1.53946
13	51904704	ENSBTAT00000052919	NSYN	missense	T->M	73.6197	2902.72	32080.7	0.0435	-0.272421
13	52565610	AVP	NSYN	missense	Y->H	52.362	3134.74	31717.4	0.0464046	1.3112
13	53929107	SIRPB1	NSYN	missense	P->A	0	20.9634	34918	0.0003	0.0283571
13	53929209	SIRPB1	NSYN	missense	V->M	0	347.51	34754.5	0.00495	0.722006
13	54716195	CHRNA4	NSYN	missense	N->I	24.6484	2038.77	33148.6	0.02965	0.391967
13	54741082	ENSBTAT00000006018	NSYN	missense	R->C	31.2723	1831.17	32884.6	0.02725	-0.336207
13	55048353	OGFR	NSYN	missense	R->Q	105.258	2806.88	32173.9	0.043	-2.94206
13	55427794	ENSBTAT00000003981	NSYN	missense	T->M	59.8145	1928.14	33200.6	0.0290971	-3.1998
13	57177795	ENSBTAT00000004704	NSYN	missense	L->S	154.832	3624.47	31409.7	0.0559	-2.36453
13	57277437	ENSBTAT00000020076	NSYN	missense	P->H	154.361	3929.18	30998.5	0.0604	-0.959722
13	59146699	PCK1	NSYN	missense	D->N	140.868	3257.57	31815	0.050255	-3.48188
13	59979423	FAM209B	NSYN	missense	R->C	0	31.6953	35185.3	0.00045	0.0433817
13	59999499	ENSBTAT00000008192	NSYN	missense	R->H	59.8723	2560.42	32598.7	0.03805	-0.406937
13	60111423	FAM210B	NSYN	missense	S->N	7.0412	1077.3	34121.7	0.0155	0.141078
13	60356030	ENSBTAT00000044308	NSYN	missense	V->M	21.081	1767.29	33346.6	0.02575	0.129977
13	60755639	ANGPT4	NSYN	missense	L->M	28.1512	1597.58	33563.3	0.0235	-0.720813
13	61280116	ENSBTAT00000002731	NSYN	missense	R->C	3.5188	358.918	34829.1	0.00519948	-0.813317
13	61998733	TTLL9	NSYN	missense	L->V	52.305	2168.91	32645.3	0.0326033	-1.02005
13	62881133	BPIFB6	NSYN	missense	T->M	0	151.399	35057.6	0.00215	0.24541
13	63409459	SNTA1	NSYN	missense	E->K	119.306	3537.07	31433.6	0.0538	-0.647372
13	64686987	ENSBTAT00000010424	NSYN	missense	L->F	63.2196	2574.44	32484.3	0.03845	-0.547321
13	65370304	ENSBTAT00000007911	NSYN	missense	R->W	1732.89	11803.4	21613.7	0.2172	-0.727702
13	65962191	ENSBTAT00000002151	NSYN	missense	R->W	24.6435	1559.58	33620.8	0.02285	-0.486312
13	66021572	AAR2	NSYN	missense	R->W	14.0224	1226.96	33815	0.0179	-0.243385
13	66821840	ENSBTAT00000057162	NSYN	missense	S->T	3.5173	408.007	34761.5	0.0059	-0.631535
13	67680142	TGM2	NSYN	missense	G->S	3.5217	461.343	34755.7	0.00664934	-0.468178
13	70650923	ENSBTAT00000063890	NSYN	missense	G->R	3.5216	662.061	34550.4	0.0095	-0.0488934
13	70676668	LPIN3	NSYN	missense	P->L	17.6015	1577.09	33608.3	0.0229	0.0522594
13	70678712	LPIN3	NSYN	missense	T->I	0	151.326	35040.7	0.00215	0.245339
13	70856767	CHD6	NSYN	missense	R->G	0	207.532	34967.5	0.00295	0.362558
13	72907699	IFT52	NSYN	missense	I->M	21.126	1211.22	33977.7	0.0178	-1.21755
13	74373642	ENSBTAT00000014992	NSYN	missense	Q->L	354.823	5680.68	29095.5	0.09095	-2.01201
13	74440423	ENSBTAT00000006831	LOF	nonsense	W->*	10.557	626.382	34556.6	0.00919908	-1.79063
13	74803724	ENSBTAT00000019075	NSYN	missense	F->C	21.1008	1269.56	33880.9	0.0186481	-0.981672
13	75336974	ENSBTAT00000027152	NSYN	missense	Y->C	1059.6	8241.7	25788.2	0.147635	-12.2393
13	75357348	ENSBTAT00000001267	NSYN	missense	S->L	425.799	5665.59	29098.6	0.0926	-5.74649
13	75418550	ZNF335	NSYN	missense	T->M	788.704	7443.39	26981.4	0.128087	-8.52272
13	75568377	CD40	NSYN	missense	V->M	0	7.0422	35204	0.0001	0.00929321
13	75618878	CDH22	NSYN	missense	G->D	0	3.5186	35182.5	5e-05	0.00462051
13	76883960	SULF2	NSYN	missense	R->C	109.132	3347.9	31747	0.05065	-0.757736
13	76907204	SULF2	NSYN	missense	D->N	14.0804	1851.57	33335.3	0.0267	1.04707
13	78715646	ENSBTAT00000024049	NSYN	missense	V->I	77.4202	2495.04	32618.5	0.03765	-1.96816
13	78737673	RNF114	NSYN	missense	C->W	0	34.932	34897.1	0.0005	0.0482456
13	81601952	ENSBTAT00000033918	NSYN	missense	R->H	35.213	2292.37	32885.4	0.03355	0.213002
14	1204707	ENSBTAT00000063925	NSYN	missense	R->Q	31.6494	1814.57	33323.3	0.0266973	-0.429752
14	1657068	KIFC2	NSYN	missense	P->L	0	95.0805	35119.9	0.00135	0.142583
14	1846633	MROH1	NSYN	missense	A->T	0	17.502	34986.5	0.00025	0.0235306
14	1971143	ENSBTAT00000037416	NSYN	missense	G->R	0	482.172	34712.8	0.00685	1.16017
14	1976528	ENSBTAT00000037416	NSYN	missense	V->G	0	10.4247	34738.6	0.00015	0.0139197
14	2026204	ENSBTAT00000012765	NSYN	missense	E->K	0	281.64	34923.4	0.004	0.539842
14	2072259	ENSBTAT00000015828	NSYN	missense	S->L	10.3986	1445.41	33206.2	0.02115	0.482746
14	2254473	CCDC166	NSYN	missense	P->T	3.509	712.327	34374.2	0.01025	0.0234625
14	2282742	ENSBTAT00000063252	NSYN	missense	G->R	7.0402	725.141	34468.8	0.0105	-0.509653
14	2950455	BAI1	NSYN	missense	R->W	0	221.659	34962.3	0.00315	0.394287
14	2951709	ENSBTAT00000008376	NSYN	missense	T->P	0	3.518	35176.5	5e-05	0.00462011
14	4061098	PTK2	NSYN	missense	I->M	734.823	7815.85	26608.3	0.13205	-3.17481
14	16760739	ZNF572	NSYN	missense	C->G	0	158.314	35022.7	0.00225	0.259148
14	17173319	ENSBTAT00000027187	NSYN	missense	L->F	1	912.12	34304.9	0.012978	1.12007
14	17556114	ENSBTAT00000025707	NSYN	missense	N->D	45.7743	1982.38	33182.8	0.02945	-1.15778
14	17564732	ENSBTAT00000025707	NSYN	missense	D->H	35.219	1750.38	33433.4	0.02585	-0.947829
14	18142626	ENSBTAT00000020381	NSYN	missense	S->G	42.2556	1820.51	33350.2	0.02705	-1.44893
14	19717812	ENSBTAT00000026503	NSYN	missense	D->N	24.6211	1737.55	33410.8	0.0254	-0.109264
14	20757774	ENSBTAT00000061199	NSYN	missense	V->G	0	3.4942	34938.5	5e-05	0.00460438
14	21618249	C14H8orf22	NSYN	missense	V->M	345.916	5957.44	28637.6	0.09515	-0.611617
14	23582620	ENSBTAT00000004487	NSYN	missense	F->L	144.349	3957.27	31108.9	0.060294	-0.500393
14	23582636	ENSBTAT00000004487	LOF	nonsense	R->*	101.906	3352.36	31685.7	0.0506	-0.416707
14	24756962	ENSBTAT00000007749	NSYN	missense	K->R	0	549.292	34658.2	0.00780078	1.41511
14	24772607	TGS1	NSYN	missense	G->E	144.386	4088.58	30983	0.06215	-0.211025
14	25056080	CHCHD7	LOF	splice-site	-	105.291	3428.98	31562.7	0.05185	-0.362565
14	26285961	UBXN2B	NSYN	missense	D->G	0	31.6782	35166.3	0.00045	0.0433695
14	26639310	ENSBTAT00000006516	NSYN	missense	P->L	3.514	1208.82	33927.7	0.0173	1.12002
14	29776177	ENSBTAT00000030426	NSYN	missense	D->Y	70.418	2704.05	32434.5	0.0404	-0.614381
14	29847069	YTHDF3	NSYN	missense	A->V	0	172.573	35046.4	0.00245	0.287737
14	31792632	MTFR1	NSYN	missense	E->K	0	496.123	34689.9	0.00705	1.21146
14	32710182	ADHFE1	NSYN	missense	A->G	3.5205	161.943	35039.5	0.0024	-2.02336
14	33178647	PPP1R42	NSYN	missense	N->D	146.929	3806.15	31029.9	0.0586	-1.02538
14	33284718	CSPP1	LOF	nonsense	R->*	0	35.217	35181.8	0.0005	0.0484522
14	33318601	CSPP1	NSYN	missense	R->H	0	3.5138	35134.5	5e-05	0.00461734
14	34171025	PREX2	NSYN	missense	A->V	21.1296	1845.32	33349.6	0.0268	0.262363
14	34197260	PREX2	NSYN	missense	I->V	3.5214	380.311	34833.7	0.00549945	-0.732126
14	34213065	ENSBTAT00000023938	NSYN	missense	R->H	372.611	5930.14	28849.2	0.09495	-1.51426
14	34297947	PREX2	NSYN	missense	H->Y	158.161	3191.35	31797.5	0.0499	-5.79604
14	42011646	ZFHX4	NSYN	missense	G->D	3.5216	655.018	34557.5	0.0094	-0.059398
14	42012327	ZFHX4	NSYN	missense	S->N	309.795	4664.53	30229.7	0.07505	-6.66888
14	57184022	ENSBTAT00000046400	NSYN	missense	P->S	273.273	5682.68	29079	0.0889	0.0569343
14	57340576	NUDCD1	NSYN	missense	R->Q	0	7.042	35203	0.0001	0.00929308
14	60994456	ENSBTAT00000002161	NSYN	missense	G->R	10.56	1182.72	34006.7	0.0171	-0.0207987
14	62356877	DPYS	NSYN	missense	R->C	28.1704	1658.53	33526.3	0.02435	-0.546513
14	62770581	ENSBTAT00000060962	NSYN	missense	S->C	17.3555	836.535	33860.6	0.0125487	-2.3691
14	63462568	BAALC	LOF	nonsense	S->*	269.977	4778.95	30013.1	0.07585	-2.92229
14	66288231	ENSBTAT00000023707	NSYN	missense	E->K	0	566.784	34637.2	0.00805	1.48579
14	66402762	ENSBTAT00000046176	NSYN	missense	T->R	63.2772	2664.67	32426	0.0397	-0.333107
14	69160942	ENSBTAT00000065600	LOF	nonsense	R->*	7.0284	1131.57	34003.4	0.0163	0.239417
14	69948115	ENSBTAT00000019090	NSYN	missense	R->Q	3.5211	514.081	34689.9	0.00740074	-0.33002
14	72120645	KIAA1429	NSYN	missense	Y->D	0	3.5182	35178.5	5e-05	0.00462024
14	72809427	TMEM67	NSYN	missense	R->H	35.214	2172.7	33006.1	0.03185	0.0213864
14	72813865	TMEM67	NSYN	missense	H->R	0	211.302	35005.7	0.003	0.370667
14	72833164	TMEM67	NSYN	missense	P->S	24.4867	1976.43	32983.6	0.0289471	0.28729
14	75397736	SLC26A7	NSYN	missense	H->P	0	178.893	34894.6	0.00255026	0.301556
14	76149704	ENSBTAT00000018177	NSYN	missense	N->H	17.5645	1573.78	33537.7	0.0229	0.0522014
14	79345054	LOC100196897	NSYN	missense	Q->P	3.5173	446.697	34722.8	0.00645	-0.508663
14	79529336	ENSBTAT00000045723	NSYN	missense	E->K	20.9616	1561.64	33353.4	0.02295	-0.167725
14	79530209	ENSBTAT00000045723	NSYN	missense	A->V	10.5168	638.019	34407.5	0.0094	-1.70518
14	83427911	ENPP2	NSYN	missense	F->L	0	3.5218	35214.5	5e-05	0.00462262
14	84281884	ENSBTAT00000061037	NSYN	missense	G->R	24.6351	1706.86	33461.5	0.02495	-0.163554
15	1786847	AASDHPPT	NSYN	missense	T->A	24.3726	2029.89	32763.7	0.02985	0.420254
15	1888165	ENSBTAT00000049639	NSYN	missense	T->I	17.6035	1633.6	33559.3	0.0236976	0.139656
15	3486553	CASP4	NSYN	missense	T->A	7.0422	1119.71	34084.2	0.0161	0.213955
15	6014725	MMP12	NSYN	missense	V->I	0	165.515	35050.5	0.00235	0.273399
15	6015975	MMP12	NSYN	missense	L->P	3.521	609.133	34597.3	0.00875	-0.134063
15	6016999	MMP12	NSYN	missense	V->I	3.5213	647.919	34561.6	0.0093	-0.0701525
15	6029004	MMP3	NSYN	missense	P->L	49.2982	2236.03	32927.7	0.03315	-0.60629
15	14706003	ENSBTAT00000022028	NSYN	missense	V->I	3.5217	320.475	34896.5	0.00464954	-0.980319
15	14719633	CEP57	NSYN	missense	L->F	105.654	2623.74	32492.1	0.040246	-4.32168
15	14741500	ENSBTAT00000049113	NSYN	missense	R->Q	144.377	4345.41	30724.2	0.0658	0.194098
15	15707169	CWC15	LOF	nonsense	R->*	0	218.327	34995.7	0.0031	0.386491
15	16441510	ENSBTAT00000024789	NSYN	missense	D->N	0	38.7398	35179.3	0.00055	0.0535743
15	16910766	GUCY1A2	NSYN	missense	G->E	0	186.655	35031.3	0.00265	0.317074
15	17999979	ACAT1	NSYN	missense	R->W	7.0354	1294.51	33879	0.0185981	0.588192
15	18070878	ENSBTAT00000013589	NSYN	missense	F->S	45.7522	2333.36	32814.9	0.03445	-0.175498
15	20526217	ENSBTAT00000011504	NSYN	missense	K->N	3.5208	630.223	34574.3	0.00905	-0.098178
15	22582224	ENSBTAT00000011420	NSYN	missense	P->T	0	154.845	35037.2	0.0022	0.25224
15	22716211	C15H11orf57	NSYN	missense	D->G	3.5214	485.953	34724.5	0.007	-0.400751
15	22877552	BCO2	LOF	nonsense	W->*	154.959	4426.9	30632.6	0.0672567	0.0931623
15	22886751	BCO2	LOF	nonsense	R->*	249.941	4245.48	30707.6	0.0674	-5.49808
15	22903083	BCO2	NSYN	missense	P->L	116.19	3383.58	31709.2	0.05135	-1.00526
15	28616192	ENSBTAT00000030167	NSYN	missense	D->Y	63.036	2927.67	32029.3	0.0436	0.120927
15	29091018	IL10RA	NSYN	missense	R->C	0	3.5173	35169.5	5e-05	0.00461965
15	29827356	PHLDB1	NSYN	missense	V->A	3.5215	316.935	34894.5	0.0046	-0.996542
15	30162598	ENSBTAT00000013636	NSYN	missense	R->H	144.32	4220.48	30831.7	0.0640564	0.00202782
15	30189243	VPS11	NSYN	missense	V->G	0	7.0278	35132	0.0001	0.00928361
15	30303449	CCDC153	LOF	splice-site	-	3.5215	524.703	34690.3	0.00754925	-0.305287
15	34069857	ENSBTAT00000018593	NSYN	missense	D->N	668.439	7838.33	26674.2	0.1304	-1.35221
15	35048788	SERGEF	NSYN	missense	G->R	232.379	4566.61	30410	0.07145	-2.11001
15	35432074	ENSBTAT00000001310	NSYN	missense	G->R	3.5212	221.836	34983.1	0.00325033	-1.53712
15	35456931	ENSBTAT00000001310	NSYN	missense	E->K	14.0848	1014.11	34183.8	0.0148	-0.834816
15	35633117	ABCC8	NSYN	missense	I->M	3.521	672.511	34534	0.00965	-0.0335975
15	35659714	B7H6	NSYN	missense	I->V	7.0436	309.918	34897.5	0.00460046	-2.69267
15	36207274	ENSBTAT00000034300	NSYN	missense	R->C	0	14.012	35016	0.0002	0.0187335
15	38421002	CYP2R1	NSYN	missense	V->G	0	14.0504	35111.9	0.0002	0.0187597
15	39530784	FAR1	NSYN	missense	R->Q	0	112.682	35100.3	0.0016	0.173198
15	39532774	FAR1	NSYN	missense	I->V	7.0356	710.596	34460.4	0.0103	-0.549732
15	41865905	GALNTL4	NSYN	missense	R->G	0	13.954	34871	0.0002	0.0186939
15	42385550	ENSBTAT00000013974	NSYN	missense	L->I	56.0032	1498.09	33451.4	0.0229977	-6.13332
15	42643543	MRVI1	NSYN	missense	R->H	6.9704	1010.71	33834.3	0.0147	0.0537246
15	43402607	SBF2	NSYN	missense	E->D	0	115.784	34970.2	0.00165	0.17911
15	43445545	SBF2	NSYN	missense	L->Q	0	52.8195	35160.2	0.00075	0.0745662
15	44421315	ST5	NSYN	missense	R->W	10.5615	1485.65	33708.8	0.0214	0.529287
15	45543317	ENSBTAT00000055036	NSYN	missense	V->A	0	98.5068	35082.5	0.0014	0.148517
15	45558789	ENSBTAT00000064976	NSYN	missense	S->P	0	242.549	34909.5	0.00345	0.443319
15	45622689	ENSBTAT00000052858	NSYN	missense	V->M	31.6962	2056.73	33129.6	0.0301	0.00929319
15	45654734	ENSBTAT00000021485	NSYN	missense	T->M	0	672.645	34544.4	0.00955	1.94852
15	45863322	OLFML1	NSYN	missense	D->N	0	352.18	34865.8	0.005	0.733981
15	46370826	ENSBTAT00000027039	NSYN	missense	F->L	66.8496	1980.86	33136.3	0.03005	-3.89198
15	46371319	ENSBTAT00000027039	NSYN	missense	G->R	147.911	3648.48	31420.6	0.056	-1.78514
15	46392900	ZNF215	NSYN	missense	K->N	0	98.6104	35119.4	0.0014	0.148606
15	46856326	ENSBTAT00000055625	NSYN	missense	N->S	80.5667	2718.25	32233.7	0.0410959	-1.20683
15	47044002	ENSBTAT00000020475	NSYN	missense	R->W	133.331	3287.65	31666	0.05065	-2.59049
15	47065617	TPP1	NSYN	missense	P->L	3.5213	897.931	34308	0.0128513	0.330058
15	47226117	HPX	NSYN	missense	R->W	0	119.741	35098.3	0.0017	0.185844
15	47447536	FAM160A2	NSYN	missense	R->C	3.521	943.628	34262.9	0.0135	0.424484
15	47492523	ENSBTAT00000028770	NSYN	missense	G->W	38.7343	2172.64	32998.1	0.0319532	-0.127531
15	48507368	ENSBTAT00000006913	NSYN	missense	Y->H	63.3492	3128.75	32001.9	0.04625	0.499219
15	48537649	TRIM34	NSYN	missense	L->P	38.7255	2217.91	32948.4	0.0326	-0.0554385
15	49023081	HBB	NSYN	missense	K->Q	1345.36	8608.21	24631.4	0.16335	-20.0282
15	49039494	ENSBTAT00000053945	NSYN	missense	T->A	292.052	5102.11	29792.8	0.0808	-2.29056
15	49040169	ENSBTAT00000056194	NSYN	missense	S->F	296.65	4903.45	29699.9	0.07875	-3.59941
15	49085447	ENSBTAT00000052344	NSYN	missense	H->Y	289.869	4857.93	29776.2	0.07785	-3.51293
15	49085483	ENSBTAT00000052344	LOF	nonsense	R->*	0	214.757	34991.2	0.00305	0.378484
15	49098889	ENSBTAT00000027553	NSYN	missense	P->R	76.4632	3093.28	31586.3	0.0467	-0.0190902
15	49155584	ENSBTAT00000065959	NSYN	missense	H->L	0	562.624	34601.4	0.008	1.47015
15	49155754	ENSBTAT00000065959	NSYN	missense	D->Y	10.5375	979.988	34134.5	0.01425	-0.397711
15	49176325	ENSBTAT00000065925	NSYN	missense	Y->H	288	5040.01	29794	0.07995	-2.40046
15	49242974	ENSBTAT00000063738	NSYN	missense	P->L	291.919	5092.76	29782.8	0.0807081	-2.32565
15	49263109	ENSBTAT00000054593	NSYN	missense	H->L	0	523.675	34622.3	0.00745	1.31656
15	50404008	ENSBTAT00000063769	NSYN	missense	V->G	0	278.025	34915	0.00395	0.530679
15	50992458	ENSBTAT00000026212	NSYN	missense	C->Y	77.4818	3166.19	31971.8	0.0471547	0.0234359
15	51047589	TRIM68	NSYN	missense	G->R	273.624	4616.53	30193.4	0.0735926	-4.26065
15	51067181	ENSBTAT00000065182	NSYN	missense	L->S	66.671	2982.65	32040.7	0.0444	0.0807988
15	51072724	ENSBTAT00000055288	NSYN	missense	L->S	63.342	3033.38	32093.3	0.0449	0.288
15	52196617	ENSBTAT00000061577	NSYN	missense	T->M	31.5072	2503.07	32473.4	0.03665	1.05355
15	52421271	NUMA1	NSYN	missense	L->P	0	214.757	34991.2	0.00305	0.378484
15	52431160	NUMA1	NSYN	missense	S->F	1175.71	8856.57	25168.7	0.1592	-10.0623
15	53583991	ENSBTAT00000061460	NSYN	missense	P->L	45.7431	2670.69	32470.6	0.03925	0.394666
15	54320268	ENSBTAT00000003775	NSYN	missense	M->V	161.874	3828.67	31199.5	0.059	-1.78646
15	54425990	P4HA3	NSYN	missense	H->Q	45.7821	2701.14	32473.6	0.039646	0.458931
15	54923064	ENSBTAT00000000969	NSYN	missense	R->H	14.0676	1192.23	33962.7	0.01735	-0.326481
15	55199031	SLCO2B1	NSYN	missense	M->I	13.984	1192.14	33753.9	0.01745	-0.309671
15	55410498	GDPD5	NSYN	missense	R->H	0	178.714	34859.8	0.00255026	0.30137
15	55851072	MARK1	NSYN	missense	P->Q	0	309.707	34884.3	0.0044	0.614276
15	57235023	B3GNT6	NSYN	missense	R->C	130.033	3419.51	31594.5	0.05235	-1.67862
15	57235513	ENSBTAT00000063600	NSYN	missense	S->N	10.548	931.74	34217.7	0.01355	-0.527001
15	58880898	LGR4	NSYN	missense	Q->H	70.374	2755.14	32361.5	0.04115	-0.473336
15	64122602	ENSBTAT00000061531	NSYN	missense	L->R	239.326	4888.59	30067.1	0.07625	-1.02725
15	64390750	QSER1	NSYN	missense	S->F	98.3892	3415.51	31628.6	0.0513949	-0.163923
15	65155647	CD59	NSYN	missense	V->M	45.7821	2345.45	32822.2	0.0346035	-0.15647
15	66292624	PDHX	NSYN	missense	L->Q	0	246.47	34963.5	0.0035	0.452228
15	67515815	LDLRAD3	NSYN	missense	I->L	3.5208	337.997	34870	0.00489951	-0.901561
15	74363408	TTC17	NSYN	missense	Q->R	0	203.012	34799	0.0029	0.353686
15	76139410	ENSBTAT00000008450	NSYN	missense	P->R	0	133.821	35082.2	0.0019	0.211767
15	76827042	GYLTL1B	NSYN	missense	D->N	76.7184	2559.6	32235.7	0.0389	-1.53779
15	77400124	AMBRA1	NSYN	missense	A->T	3.5141	242.473	34895	0.00355	-1.3953
15	77489574	ATG13	NSYN	missense	R->L	0	387.101	34803.9	0.0055	0.840052
15	77613827	CKAP5	NSYN	missense	Y->N	0	137.346	35079.7	0.00195	0.218393
15	78359146	MADD	NSYN	missense	V->M	56.0736	2130.8	32855.6	0.0320032	-1.55641
15	78449126	SLC39A13	NSYN	missense	R->C	66.5266	2748.6	32198.9	0.04115	-0.288836
15	79187997	OR4X1	NSYN	missense	C->S	470.568	6686.28	27960.2	0.1086	-1.27018
15	79261241	ENSBTAT00000016656	NSYN	missense	L->F	94.7646	3415.04	31588.2	0.05135	-0.060048
15	79315315	LOC513151	NSYN	missense	T->I	108.295	3493.4	31332.3	0.0531	-0.308387
15	81989920	SLC43A3	NSYN	missense	L->V	7.0396	172.47	35018.5	0.00265	-4.37823
15	82068538	SLC43A1	NSYN	missense	T->A	3.4997	703.44	34293.6	0.010149	0.0138879
15	83605093	ENSBTAT00000003182	NSYN	missense	H->P	80.5391	903.439	34029.5	0.0152015	-25.6011
15	84088828	ENSBTAT00000003469	NSYN	missense	A->D	7.01	1184.69	33858.3	0.0171	0.349004
15	84168334	PATL1	NSYN	missense	A->V	59.8621	2482.52	32670.6	0.03695	-0.607606
15	84237913	ENSBTAT00000065002	NSYN	missense	T->M	42.2508	2094.94	33071.8	0.03095	-0.497664
15	84485278	ENSBTAT00000026770	NSYN	missense	R->W	66.5494	2977.21	31982.2	0.0444	0.080719
15	84538208	MS4A7	NSYN	missense	V->I	105.648	3007.45	32102.9	0.0457	-1.88813
15	84900033	ENSBTAT00000016226	NSYN	missense	T->P	0	3.5199	35195.5	5e-05	0.00462137
16	43330720	ANGPTL7	LOF	nonsense	W->*	10.5639	1345.14	33860.8	0.0193981	0.230487
17	1931330	ENSBTAT00000025362	NSYN	missense	E->K	97.5576	1721.19	33026.7	0.0274973	-13.2668
17	2060505	NPY2R	NSYN	missense	G->D	0	565.609	34565.4	0.00805	1.48339
17	2848486	ENSBTAT00000002145	NSYN	missense	S->T	7.0436	947.364	34263.6	0.01365	-0.0479543
17	3310754	ENSBTAT00000017605	NSYN	missense	R->W	0	295.831	34922.2	0.0042	0.576771
17	3951733	TLR2	NSYN	missense	S->F	3.5211	669.009	34538.5	0.0096	-0.0386342
17	6927665	ENSBTAT00000061161	LOF	splice-site	-	0	77.4554	35129.5	0.0011	0.113301
17	6957524	ENSBTAT00000061161	NSYN	missense	E->Q	809.899	7648.26	26754.8	0.1316	-7.4316
17	9743140	NR3C2	NSYN	missense	N->H	24.647	415.478	34766.4	0.00660066	-10.7798
17	9743469	NR3C2	NSYN	missense	N->K	0	157.72	34891.3	0.00225	0.258558
17	13324953	ENSBTAT00000026452	NSYN	missense	L->V	158.247	3615.06	31392.7	0.0559	-2.66043
17	13325377	OTUD4	NSYN	missense	R->H	0	253.548	34961.5	0.0036	0.469316
17	14312136	GYPB	NSYN	missense	L->F	1436.24	8659.37	24849.4	0.165	-25.0439
17	17374357	ENSBTAT00000029790	NSYN	missense	Y->C	883.52	7712.32	26604.2	0.13465	-10.246
17	18882903	ELF2	NSYN	missense	S->L	0	218.314	34993.7	0.0031	0.386477
17	25481925	PCDH10	NSYN	missense	R->C	0	242.783	34943.2	0.00345	0.443599
17	25494268	PCDH10	NSYN	missense	L->F	3.5192	496.207	34692.3	0.00715	-0.373352
17	29225501	ENSBTAT00000061229	NSYN	missense	T->I	3.5217	496.56	34716.9	0.00715	-0.373521
17	30144235	MFSD8	NSYN	missense	D->N	0	499.67	34688.3	0.0071	1.22456
17	30170411	ENSBTAT00000061407	NSYN	missense	N->S	14.052	1201.45	33914.5	0.0175	-0.302888
17	32796702	ENSBTAT00000013316	NSYN	missense	R->C	151.356	4596.99	30450.7	0.0696	0.538935
17	32888187	ENSBTAT00000013316	NSYN	missense	R->W	98.5768	3495.96	31611.5	0.05245	-0.0450275
17	33529167	ANKRD50	NSYN	missense	S->L	137.346	3704.83	31374.8	0.0565	-0.967796
17	33529880	ANKRD50	NSYN	missense	Q->E	24.6526	1954.6	33238.7	0.02845	0.220984
17	37404736	FSTL5	NSYN	missense	Y->S	0	42.258	35172.7	0.0006	0.058744
17	40492982	RAPGEF2	NSYN	missense	R->W	3.5191	1150.75	34036.7	0.01645	0.943954
17	41330115	ENSBTAT00000013620	NSYN	missense	R->Q	3.5211	1102.1	34105.4	0.01575	0.807528
17	44509453	GUCY1B3	NSYN	missense	R->G	0	77.4092	35108.6	0.0011	0.113264
17	44967031	ENSBTAT00000006896	NSYN	missense	F->V	10.5564	348.361	34832.6	0.00524948	-4.11046
17	44968356	ENSBTAT00000006896	NSYN	missense	P->L	0	443.155	34727.8	0.0063	1.02347
17	45141622	LOC100125388	NSYN	missense	K->E	49.2786	2347.77	32798.4	0.0347535	-0.32441
17	45518146	POLE	NSYN	missense	H->Y	10.5648	1690.37	33518.6	0.0242976	1.09993
17	45542570	POLE	NSYN	missense	A->G	52.8195	2436.74	32719.9	0.0361036	-0.318684
17	45548471	POLE	NSYN	missense	G->R	658.846	6686.59	27699.6	0.1142	-9.53617
17	45680700	ENSBTAT00000056742	NSYN	missense	P->T	62.7678	414.965	34389.8	0.00775078	-34.3716
17	46017518	ENSBTAT00000022893	NSYN	missense	P->L	3.5215	746.558	34461.4	0.0107011	0.0684748
17	46018517	ENSBTAT00000022893	NSYN	missense	M->T	0	376.34	34795.7	0.00535	0.807125
17	46059263	EP400	NSYN	missense	A->T	14.0844	1330.98	33865.9	0.0193	-0.0696955
17	46108162	EP400	NSYN	missense	P->S	0	545.662	34658.3	0.00775	1.40079
17	46127808	EP400	NSYN	missense	N->T	0	7.0262	35124	0.0001	0.00928254
17	46247073	ENSBTAT00000029698	NSYN	missense	R->Q	91.4628	2947.92	32138.6	0.0445	-1.1088
17	47174079	GPR133	NSYN	missense	G->R	49.2884	1380.08	33776.6	0.021	-5.83357
17	47667319	ENSBTAT00000037063	NSYN	missense	R->Q	0	49.2926	35159.7	0.0007	0.0692358
17	49259129	ENSBTAT00000029686	NSYN	missense	L->F	7.0434	834.643	34375.3	0.01205	-0.245389
17	52784685	ENSBTAT00000029679	NSYN	missense	T->P	7.0132	1122.11	33936.9	0.0162	0.226179
17	52785279	ENSBTAT00000029679	NSYN	missense	P->S	3.5217	676.166	34537.3	0.0097	-0.0286245
17	53098524	DHX37	NSYN	missense	V->A	3.5217	1190.33	34023.1	0.017	1.05784
17	54050265	ENSBTAT00000029664	NSYN	missense	I->T	3.5211	570.418	34633.5	0.00820082	-0.206638
17	54569027	ENSBTAT00000027321	NSYN	missense	R->W	24.6512	1521.33	33673.5	0.0222978	-0.59206
17	54629507	MPHOSPH9	NSYN	missense	P->S	0	443.394	34746.6	0.0063	1.02387
17	55036020	HCAR1	NSYN	missense	S->F	7.0438	947.391	34268.1	0.0136486	-0.0480253
17	55131692	KNTC1	NSYN	missense	E->G	151.081	4237.28	30743.1	0.0646065	-0.0991285
17	55319050	CLIP1	NSYN	missense	D->G	21.114	1910.82	33258.1	0.02775	0.400772
17	55378379	VPS33A	NSYN	missense	V->L	0	123.186	35072.8	0.00175	0.192173
17	55849698	MORN3	NSYN	missense	G->A	73.9494	1852.26	33287.8	0.0284	-6.29691
17	55849758	MORN3	NSYN	missense	L->P	10.5357	1194.05	33914.4	0.0173	-0.00188811
17	56745080	TCTN1	NSYN	missense	L->F	3.519	214.659	34975.3	0.00314969	-1.58623
17	57695395	ACAD10	LOF	splice-site	-	3.5199	489.266	34706.2	0.00705	-0.391457
17	57866688	ENSBTAT00000061505	NSYN	missense	R->C	801.739	7303.56	27058.7	0.12665	-10.7183
17	57907681	ENSBTAT00000061505	NSYN	missense	C->F	14.0764	1066.29	34110.6	0.01555	-0.661871
17	57974132	ENSBTAT00000061505	NSYN	missense	G->R	130.292	3609.43	31470.8	0.0549555	-0.950113
17	60340179	ENSBTAT00000064959	NSYN	missense	R->C	3.5156	562.496	34593.5	0.00809919	-0.220769
17	63462022	ENSBTAT00000029525	NSYN	missense	G->S	399.889	4184.81	30493.3	0.07105	-23.6175
17	63612891	OAS2	NSYN	missense	D->Y	0	91.5356	35114.5	0.0013	0.136602
17	63624332	OAS2	NSYN	missense	N->H	0	28.1616	35173.8	0.0004	0.0383534
17	63676915	OAS1Z	NSYN	missense	S->N	17.595	1562.44	33613.5	0.0226977	0.0321381
17	63712051	RPH3A	NSYN	missense	R->H	77.4664	3017.67	32116.9	0.04505	-0.20763
17	64245043	ENSBTAT00000014551	NSYN	missense	A->V	0	35.217	35181.8	0.0005	0.0484522
17	64253891	ENSBTAT00000065760	NSYN	missense	M->T	84.5136	3007.28	32122.2	0.0451	-0.530603
17	64292206	ENSBTAT00000011545	NSYN	missense	A->E	24.521	1453.75	33551.7	0.02145	-0.770776
17	64292376	ENSBTAT00000011545	NSYN	missense	G->S	84.3624	3026.5	32036.6	0.0454545	-0.466382
17	64323728	ENSBTAT00000011542	NSYN	missense	H->R	88.0325	3042.4	32082.6	0.0457	-0.608818
17	64778918	ENSBTAT00000023117	NSYN	missense	R->C	102.097	3524.12	31583.3	0.0529447	-0.0917445
17	64886119	SIRT4	NSYN	missense	F->S	21.0582	1614.46	33458	0.0236024	-0.0906432
17	65000650	GATC	NSYN	missense	W->C	105.291	3028.87	31962.8	0.04615	-1.73145
17	65431215	HNF1A	NSYN	missense	M->V	3.5205	42.246	35159.2	0.0007	-4.01934
17	65534618	ANKRD13A	NSYN	missense	V->I	42.2592	1869.97	33303.8	0.02775	-1.24057
17	65740757	C17H12orf34	NSYN	missense	R->C	0	207.639	34985.4	0.00295	0.362676
17	65892158	MMAB	NSYN	missense	R->C	10.5633	1133.79	34066.6	0.0164	-0.0940676
17	65917323	UBE3B	NSYN	missense	L->V	0	59.8383	35139.2	0.00085	0.0853559
17	66010091	ENSBTAT00000003490	NSYN	missense	Y->C	95.0427	3171.61	31934.3	0.04775	-0.590977
17	66124999	ENSBTAT00000029560	NSYN	missense	E->G	10.5447	1339.18	33799.3	0.01935	0.223882
17	66572403	SELPLG	NSYN	missense	P->L	0	225.133	34951.9	0.0032	0.402301
17	66592293	TMEM119	NSYN	missense	D->N	84.4392	2814.64	32283.9	0.0424	-1.13676
17	66629697	ENSBTAT00000015620	NSYN	missense	Q->H	200.572	4261.27	30726.2	0.06625	-1.9232
17	66827784	CMKLR1	NSYN	missense	S->T	52.7505	2292.89	32821.4	0.0341	-0.679053
17	66853185	ENSBTAT00000018189	NSYN	missense	R->H	133.752	3755.63	31308.6	0.05715	-0.645143
17	67415079	ENSBTAT00000061095	NSYN	missense	R->P	52.8015	2326.79	32821.4	0.03455	-0.588493
17	67549847	CRYBB3	LOF	nonsense	R->*	0	183.087	35025.9	0.0026	0.309602
17	67790907	ENSBTAT00000000932	NSYN	missense	R->W	31.635	1335.7	33779.2	0.019902	-2.39185
17	68354352	ENSBTAT00000055936	NSYN	missense	V->G	0	55.6032	34696.4	0.0008	0.0793767
17	69474630	ENSBTAT00000013813	NSYN	missense	F->L	270.308	5455.32	29375.9	0.0854085	-0.274974
17	69475844	ENSBTAT00000013813	NSYN	missense	Y->S	0	24.22	34575.8	0.00035	0.0330881
17	69663115	ENSBTAT00000031632	NSYN	missense	S->L	7.0166	1122.66	33953.3	0.0162	0.226244
17	70345611	XBP1	NSYN	missense	P->A	1550.06	10084.1	23355.8	0.1884	-8.88512
17	70534278	ENSBTAT00000028780	NSYN	missense	G->R	228.488	4492.43	30427.6	0.070407	-2.26437
17	70659038	EMID1	NSYN	missense	T->M	14.0832	1003.43	34190.5	0.01465	-0.871847
17	70724358	GAS2L1	NSYN	missense	A->D	62.451	2345.38	32287.2	0.0356	-1.19524
17	70828174	ENSBTAT00000029508	NSYN	missense	S->N	10.5372	1485.75	33627.7	0.02145	0.536911
17	71247152	MTMR3	NSYN	missense	S->L	0	411.758	34781.2	0.00585	0.918463
17	72056880	SMTN	NSYN	missense	R->Q	31.6791	1897.23	33270.1	0.02785	-0.249207
17	72056984	SMTN	NSYN	missense	E->K	0	313.387	34898.6	0.00445	0.624095
17	72089872	ENSBTAT00000015876	LOF	nonsense	W->*	538.606	6973.71	27687.2	0.114361	-1.94032
17	72405571	ENSBTAT00000011845	NSYN	missense	F->L	73.8507	2809.84	32283.3	0.04205	-0.509733
17	72484775	ENSBTAT00000011858	NSYN	missense	R->C	123.252	3176.39	31915.4	0.0486	-2.43012
17	72495583	ENSBTAT00000011858	NSYN	missense	H->Y	0	10.5654	35207.4	0.00015	0.0140148
17	72549250	ENSBTAT00000001707	NSYN	missense	D->N	0	56.3488	35161.7	0.0008	0.0799504
17	73347745	ENSBTAT00000018360	NSYN	missense	V->M	7.0294	984.116	34155.9	0.0142	0.00534559
17	73647845	SPECC1L	NSYN	missense	D->G	38.4417	2362.42	32546.1	0.0349	0.187571
17	73649699	ENSBTAT00000029400	NSYN	missense	R->H	104.868	2929.31	31921.8	0.0449	-2.1626
17	73800987	RTDR1	NSYN	missense	P->H	73.9116	3199.32	31919.3	0.0475548	0.188065
17	73801124	RTDR1	NSYN	missense	E->K	0	3.516	35156.5	5e-05	0.00461879
17	73945924	TOP3B	NSYN	missense	L->V	21.1026	1716.34	33430	0.0250025	0.0489067
17	73948395	TOP3B	NSYN	missense	D->N	17.5445	445.63	34629.3	0.00684932	-6.38107
17	74157067	ENSBTAT00000064964	NSYN	missense	D->N	3.5209	700.659	34504.8	0.01005	0.0046184
17	74287839	ENSBTAT00000066024	NSYN	missense	R->H	7.0434	1123.42	34090.1	0.0161484	0.220242
17	74445920	PRODH	NSYN	missense	G->S	320.093	5381.77	29473.1	0.0856	-2.1019
17	74616168	DGCR14	NSYN	missense	E->D	3.5177	158.296	35011.7	0.00235024	-2.05597
17	74736111	CDC45	NSYN	missense	R->W	0	271.032	34928	0.00385	0.512843
17	75041084	ENSBTAT00000006197	NSYN	missense	G->D	6.9468	1264.32	33462.7	0.0184	0.54942
18	1843971	ENSBTAT00000026393	NSYN	missense	T->M	337.949	5625.44	29236.1	0.089509	-1.6606
18	1875024	MRCL	NSYN	missense	R->G	17.6005	1358.76	33824.6	0.0198	-0.311658
18	1933657	F1N4M3_BOVIN	LOF	frame-shift	DEL	10.5477	1160.25	33988.2	0.0168	-0.0507825
18	2291467	WDR59	NSYN	missense	T->P	0	7.0232	35109	0.0001	0.00928054
18	2536012	ENSBTAT00000001155	NSYN	missense	G->R	0	341.556	34870.4	0.00485	0.703187
18	2617711	BCAR1	NSYN	missense	D->N	179.127	3930.26	31013.6	0.06105	-2.32732
18	2838676	BCNT2	NSYN	missense	P->L	3.5143	369.002	34774	0.00534947	-0.771082
18	2965794	KARS	NSYN	missense	T->N	35.202	1802.34	33364.5	0.0266	-0.77002
18	3744056	ENSBTAT00000036878	NSYN	missense	Q->R	137.323	3330.96	31742.7	0.0512	-2.70178
18	4449730	MON1B	NSYN	missense	V->M	17.5935	1301.92	33867.5	0.019	-0.444454
18	5551460	WWOX	NSYN	missense	R->H	0	348.371	34840.6	0.00495	0.723262
18	7824841	ENSBTAT00000061305	NSYN	missense	R->G	0	820.416	34390.6	0.01165	2.70109
18	8497657	ENSBTAT00000002717	NSYN	missense	L->F	2435.77	10542.1	22221.1	0.21895	-34.6688
18	10304872	ENSBTAT00000055672	NSYN	missense	Q->P	230.512	4386.71	30308.8	0.0694	-2.89567
18	11203625	FAM92B	NSYN	missense	L->M	3.5198	348.46	34849.5	0.0050495	-0.8566
18	14058675	APRT	NSYN	missense	G->R	0	176.015	35027	0.0025	0.294903
18	14067020	GALNS	NSYN	missense	T->I	21.1212	1429.2	33751.7	0.0209	-0.485333
18	14102775	ENSBTAT00000014515	NSYN	missense	P->S	101.903	3218.73	31818.4	0.0487	-0.78435
18	14108206	ENSBTAT00000014515	NSYN	missense	G->S	87.365	3256.97	31598.2	0.0491049	-0.0906297
18	14309222	ENSBTAT00000032542	NSYN	missense	G->S	3.5207	257.011	34946.5	0.00375	-1.31125
18	14525178	SPG7	NSYN	missense	R->C	59.84	2340.8	32795.8	0.0349535	-1.0632
18	14658801	FANCA	NSYN	missense	G->S	101.755	3203.53	31782.7	0.04855	-0.816875
18	14684273	FANCA	NSYN	missense	R->W	952.646	8457.81	25742.5	0.1474	-5.60027
18	14684345	FANCA	NSYN	missense	R->W	214.683	4677.28	30302	0.07255	-0.870438
18	14747566	TCF25	NSYN	missense	T->M	200.674	4379.63	30622.2	0.0679068	-1.40103
18	15388825	GPT2	NSYN	missense	E->K	0	133.752	35064.2	0.0019	0.211703
18	16820437	LONP2	NSYN	missense	G->S	0	38.7354	35175.3	0.00055	0.053571
18	18195357	ENSBTAT00000023130	NSYN	missense	T->M	56.2848	2089.57	33028.6	0.0313031	-1.79327
18	18782767	ADCY7	NSYN	missense	A->V	56.1968	2887.11	32179.7	0.0427	0.320007
18	18798323	ADCY7	NSYN	missense	P->S	203.568	2018.13	32876.3	0.03455	-36.056
18	19183481	NOD2	NSYN	missense	R->C	52.812	1929.4	33225.8	0.0289	-2.21581
18	19268985	ENSBTAT00000008257	NSYN	missense	K->E	3.5217	531.777	34681.7	0.00765	-0.289114
18	20318610	ENSBTAT00000045009	NSYN	missense	A->T	7.0254	1127.58	33992.4	0.01625	0.232862
18	22056270	ENSBTAT00000016585	NSYN	missense	S->R	281.656	5344.42	29580.9	0.0839	-0.86754
18	22063244	ENSBTAT00000016585	NSYN	missense	R->L	3.5207	383.756	34823.2	0.00554945	-0.718993
18	24057863	CES1	NSYN	missense	A->T	7.0114	1016.65	34033.3	0.0147	0.0538914
18	25052883	HERPUD1	NSYN	missense	R->Q	0	246.533	34972.5	0.0035	0.452303
18	25275983	ENSBTAT00000002896	NSYN	missense	F->L	3.5218	651.533	34562.9	0.00935	-0.0647469
18	25721124	GPR56	NSYN	missense	Y->C	63.3168	2194.98	32917.7	0.033	-2.04438
18	25767306	CCDC135	NSYN	missense	R->W	0	390.931	34828.1	0.00555	0.85154
18	25808235	ENSBTAT00000032447	NSYN	missense	R->Q	95.0481	2904.25	32203.7	0.04395	-1.54383
18	25911789	CNGB1	NSYN	missense	M->R	0	302.797	34902.7	0.00430043	0.595479
18	25974915	ENSBTAT00000016991	NSYN	missense	I->M	3.5184	689.606	34487.4	0.00990099	-0.0092592
18	26033967	MMP15	NSYN	missense	R->C	0	84.4872	35118.5	0.0012	0.124838
18	26203871	PRSS54	NSYN	missense	Q->H	3.5218	750.143	34464.3	0.01075	0.0736211
18	26287999	GINS3	NSYN	missense	T->M	0	24.6449	35182.4	0.00035	0.0333876
18	29576098	CDH8	NSYN	missense	L->P	3.5214	1119.81	34090.7	0.016	0.855484
18	32844936	CDH11	NSYN	missense	E->K	105.57	2477.38	32610.6	0.0381962	-5.54445
18	34394625	ENSBTAT00000054860	NSYN	missense	S->T	84.3936	2007.86	33071.7	0.03095	-6.65566
18	34710522	ENSBTAT00000063372	NSYN	missense	R->C	24.6512	1355.82	33839.1	0.019948	-1.15573
18	34738958	ENSBTAT00000012610	NSYN	missense	H->Y	3.494	0	34933	0.00010001	-7.07023
18	34806245	CES4A	NSYN	missense	V->M	123.246	2968.46	32121.3	0.04565	-3.75537
18	34936891	KIAA0895L	NSYN	missense	G->C	341.479	5255.96	29606.6	0.08435	-3.95671
18	34943983	EXOC3L1	NSYN	missense	V->M	235.867	4541.32	30423.3	0.0712071	-2.42976
18	34978159	FHOD1	NSYN	missense	R->C	0	98.6076	35118.4	0.0014	0.148603
18	35101756	RAB27A	NSYN	missense	S->L	123.246	3729.06	31357.2	0.0564556	-0.329613
18	35328469	ENSBTAT00000025159	NSYN	missense	S->L	0	274.677	34940.3	0.0039	0.521919
18	35457993	ENSBTAT00000008380	NSYN	missense	P->L	3.5215	915.59	34295.9	0.0131	0.365488
18	35463252	ENSBTAT00000008380	NSYN	missense	Y->N	45.7574	2052.04	33100.2	0.03045	-0.900526
18	35587877	ENSBTAT00000003655	NSYN	missense	T->I	344.627	5281.93	29539.4	0.0849	-3.93054
18	36273231	ENSBTAT00000018522	NSYN	missense	Y->C	0	87.995	35110	0.00125	0.13068
18	37084965	WWP2	NSYN	missense	G->R	49.3052	2398.35	32770.3	0.03545	-0.223162
18	39218128	DHODH	NSYN	missense	A->V	0	379.814	34788.2	0.0054	0.817861
18	40173045	ENSBTAT00000005218	NSYN	missense	R->C	161.046	3760.07	31085.4	0.0583058	-2.01683
18	40300873	ENSBTAT00000005218	NSYN	missense	L->P	7.0242	1074.7	34039.3	0.0155	0.140885
18	40741129	URI1	NSYN	missense	V->F	105.609	3407.65	31689.7	0.0514	-0.437548
18	40744920	URI1	NSYN	missense	N->T	17.584	1227.36	33919.5	0.0179518	-0.648381
18	41212892	ENSBTAT00000009552	NSYN	missense	L->F	387.376	6275.49	28549.6	0.10011	-0.700876
18	44378414	CHST8	NSYN	missense	A->T	21.0576	1888.16	33186.8	0.0275	0.361933
18	45732153	ZNF599	NSYN	missense	E->G	238.483	5095.82	29736.7	0.07945	-0.376099
18	46038868	FXYD3	LOF	nonsense	R->*	0	285.144	34917.9	0.00405	0.548924
18	46162874	ENSBTAT00000022648	NSYN	missense	R->W	104.874	3516.77	31336.4	0.0533	-0.157809
18	46189698	MAG	NSYN	missense	A->V	0	207.692	34994.3	0.00295	0.362735
18	46200693	MAG	LOF	nonsense	R->*	3.5212	658.464	34546.5	0.00945095	-0.0540615
18	46391562	GAPDHS	NSYN	missense	D->N	0	91.5668	35126.4	0.0013	0.136629
18	46623839	ENSBTAT00000003584	NSYN	missense	P->Q	151.154	3673.38	31327.5	0.05655	-1.85435
18	46641902	IGFR1_BOVIN	LOF	frame-shift	DEL	0	239.387	34964.6	0.0034	0.435377
18	46703673	PRODH2	NSYN	missense	R->W	31.689	2014.01	33167.8	0.0294971	-0.0487641
18	46749570	ENSBTAT00000010297	NSYN	missense	S->N	17.606	1031.71	34166.2	0.0151485	-1.38986
18	46760309	APLP1	NSYN	missense	H->N	45.7509	1823	33324.3	0.0272	-1.8644
18	46922366	ENSBTAT00000019966	NSYN	missense	R->Q	77.0946	2782.41	32183.5	0.0419	-0.753127
18	47673744	ZNF570	NSYN	missense	Q->R	123.221	3193.18	31889.6	0.04885	-2.33202
18	47753551	ENSBTAT00000006317	NSYN	missense	G->R	0	3.5166	35162.5	5e-05	0.00461919
18	47778596	ZNF345	NSYN	missense	I->T	27.8136	1595.81	33143.4	0.02375	-0.661547
18	48183675	ENSBTAT00000024256	NSYN	missense	A->V	45.3284	2374.51	32448.2	0.03535	-0.0697506
18	48433990	ENSBTAT00000000821	NSYN	missense	L->P	0	10.5636	35201.4	0.00015	0.0140136
18	48863200	SIRT2	NSYN	missense	I->S	0	49.2884	35156.7	0.0007	0.0692326
18	48892616	LOC614600	NSYN	missense	R->C	10.5513	1220.43	33936.5	0.0176518	0.0313373
18	49448951	DLL3	NSYN	missense	P->Q	0	35.205	35169.8	0.0005	0.0484435
18	49450445	DLL3	NSYN	missense	N->S	42.228	2121.96	33025.8	0.03135	-0.426697
18	49739458	ENSBTAT00000006924	NSYN	missense	G->R	38.6969	2019.27	33117.5	0.029803	-0.439759
18	49740310	ENSBTAT00000006924	NSYN	missense	P->A	42.228	2234.57	32913.2	0.03295	-0.186548
18	50109665	ENSBTAT00000007434	NSYN	missense	C->Y	139.464	3259.97	31466.6	0.05075	-3.2197
18	50274584	ITPKC	NSYN	missense	E->K	0	176.04	35032	0.0025	0.294929
18	51226903	LIPE	NSYN	missense	A->E	21.0492	1003.35	34057.6	0.0149	-2.25047
18	51371551	GSK3A	NSYN	missense	L->P	319.856	5908.55	28920.6	0.09315	-0.260802
18	51660589	ENSBTAT00000025175	NSYN	missense	V->G	0	3.4843	34839.5	5e-05	0.00459781
18	52123956	ENSBTAT00000031940	NSYN	missense	M->T	73.2102	3329.32	31459.5	0.04985	0.531493
18	52124181	ENSBTAT00000031940	NSYN	missense	F->C	59.5374	1218.77	33740.2	0.0191019	-10.682
18	52268228	ENSBTAT00000043768	NSYN	missense	P->L	91.5486	3278.14	31841.3	0.04915	-0.205685
18	52331351	LYPD5	NSYN	missense	S->F	66.8686	2590.28	32536.9	0.0387	-0.731949
18	52485200	ZNF226	NSYN	missense	F->C	91.377	3272	31781.6	0.04915	-0.205458
18	52485751	ENSBTAT00000037250	NSYN	missense	E->K	91.4784	3286.19	31806.3	0.0493	-0.185976
18	52503876	ZNF227	NSYN	missense	H->N	95.0319	3266.28	31839.2	0.0490951	-0.354144
18	52639960	ZNF180	NSYN	missense	R->I	139.24	3087.65	31583.1	0.04835	-4.42108
18	52739333	ENSBTAT00000064678	NSYN	missense	V->E	56.3184	2717.36	32425.3	0.0402	0.0187791
18	53204841	PPP1R37	NSYN	missense	R->C	3.5196	556.097	34636.4	0.008	-0.235405
18	53520236	RTN2	NSYN	missense	V->A	140.6	3399	31610.4	0.05235	-2.55075
18	53677218	ENSBTAT00000007271	NSYN	missense	E->D	1056.54	9308.79	24735.7	0.1627	-2.47205
18	53755668	SIX5	NSYN	missense	E->K	0	59.8128	35124.2	0.00085	0.0853362
18	53943570	ENSBTAT00000007652	NSYN	missense	R->G	38.7134	1566.13	33585.6	0.0233523	-2.24597
18	54126696	CCDC8	NSYN	missense	R->K	3058.3	13220	18713.7	0.2763	-7.16018
18	54273797	ENSBTAT00000007668	NSYN	missense	R->G	98.5684	3055.62	32045.3	0.0462046	-1.16698
18	54295030	FKRP	NSYN	missense	L->F	3.5209	387.299	34821.7	0.00559944	-0.706147
18	54779449	GPR77	NSYN	missense	A->E	0	38.7387	35178.3	0.00055	0.0535735
18	54788709	DHX34	NSYN	missense	R->H	0	763.688	34429.3	0.01085	2.39858
18	55071529	ENSBTAT00000028239	NSYN	missense	G->S	190.053	3758.83	31242.6	0.0588059	-4.29699
18	55092550	GLTSCR2	NSYN	missense	Y->C	28.1064	1763.68	33341.2	0.0259	-0.283082
18	55097310	GLTSCR2	NSYN	missense	R->Q	0	535.253	34678.7	0.0076	1.3595
18	55173560	Q45UD2_BOVIN	LOF	frame-shift	DEL	0	95.0913	35123.9	0.00135	0.142592
18	55370913	ENSBTAT00000054463	NSYN	missense	R->Q	178.118	3897.63	30849.3	0.0609	-2.37365
18	55454297	ENSBTAT00000043347	NSYN	missense	E->Q	10.4571	1185.14	33661.4	0.0173	-0.00188104
18	55787426	FUT2	NSYN	missense	V->M	0	598.23	34591.8	0.0085	1.61741
18	55878920	HSD17B14	NSYN	missense	G->D	1595.18	9731.99	23654.8	0.1847	-14.7982
18	55916148	PLEKHA4	LOF	splice-site	-	0	355.702	34858.8	0.00505051	0.744398
18	56024851	RUVBL2	NSYN	missense	R->Q	0	496.517	34717.5	0.00705	1.21219
18	56111463	HRC	NSYN	missense	E->K	3.5212	947.203	34261.3	0.01355	0.43207
[truncated: 926 more rows]
